# Supplementary material
Source: publisher figshare collection journal article supplement (https://acs.figshare.com/ndownloader/files/4700950)
Supplement: Supplementary file 1 [file 4700950]

CRYST1  121.563  123.903   74.614  90.00  90.00  90.00 P 1           1
ATOM      1  N   VAL c  83       7.123  35.345  75.013  1.00  0.00      chA   
ATOM      2  H1  VAL c  83       7.786  36.078  74.802  1.00  0.00      chA   
ATOM      3  H2  VAL c  83       6.233  35.824  75.019  1.00  0.00      chA   
ATOM      4  H3  VAL c  83       7.206  34.661  74.275  1.00  0.00      chA   
ATOM      5  CA  VAL c  83       7.472  34.794  76.388  1.00  0.00      chA   
ATOM      6  HA  VAL c  83       8.519  34.496  76.345  1.00  0.00      chA   
ATOM      7  CB  VAL c  83       7.171  35.903  77.414  1.00  0.00      chA   
ATOM      8  HB  VAL c  83       6.122  36.197  77.413  1.00  0.00      chA   
ATOM      9  CG1 VAL c  83       7.436  35.623  78.917  1.00  0.00      chA   
ATOM     10 HG11 VAL c  83       8.445  35.223  79.015  1.00  0.00      chA   
ATOM     11 HG12 VAL c  83       7.204  36.479  79.551  1.00  0.00      chA   
ATOM     12 HG13 VAL c  83       6.745  34.810  79.140  1.00  0.00      chA   
ATOM     13  CG2 VAL c  83       7.991  37.133  77.154  1.00  0.00      chA   
ATOM     14 HG21 VAL c  83       7.963  37.582  76.161  1.00  0.00      chA   
ATOM     15 HG22 VAL c  83       7.679  37.866  77.898  1.00  0.00      chA   
ATOM     16 HG23 VAL c  83       9.046  36.894  77.284  1.00  0.00      chA   
ATOM     17  C   VAL c  83       6.612  33.528  76.659  1.00  0.00      chA   
ATOM     18  O   VAL c  83       5.403  33.630  76.428  1.00  0.00      chA   
ATOM     19  N   LYS c  84       7.187  32.434  77.050  1.00  0.00      chA   
ATOM     20  H   LYS c  84       8.188  32.518  77.158  1.00  0.00      chA   
ATOM     21  CA  LYS c  84       6.528  31.069  77.135  1.00  0.00      chA   
ATOM     22  HA  LYS c  84       5.479  31.183  77.414  1.00  0.00      chA   
ATOM     23  CB  LYS c  84       6.746  30.356  75.750  1.00  0.00      chA   
ATOM     24  HB2 LYS c  84       6.385  31.103  75.043  1.00  0.00      chA   
ATOM     25  HB3 LYS c  84       7.812  30.242  75.554  1.00  0.00      chA   
ATOM     26  CG  LYS c  84       6.112  28.941  75.540  1.00  0.00      chA   
ATOM     27  HG2 LYS c  84       6.138  28.685  74.481  1.00  0.00      chA   
ATOM     28  HG3 LYS c  84       6.750  28.137  75.907  1.00  0.00      chA   
ATOM     29  CD  LYS c  84       4.648  28.812  76.038  1.00  0.00      chA   
ATOM     30  HD2 LYS c  84       4.266  27.810  75.843  1.00  0.00      chA   
ATOM     31  HD3 LYS c  84       4.643  28.868  77.127  1.00  0.00      chA   
ATOM     32  CE  LYS c  84       3.734  29.797  75.337  1.00  0.00      chA   
ATOM     33  HE2 LYS c  84       4.118  30.790  75.571  1.00  0.00      chA   
ATOM     34  HE3 LYS c  84       3.612  29.721  74.256  1.00  0.00      chA   
ATOM     35  NZ  LYS c  84       2.394  29.706  76.028  1.00  0.00      chA   
ATOM     36  HZ1 LYS c  84       2.452  29.901  77.018  1.00  0.00      chA   
ATOM     37  HZ2 LYS c  84       1.670  30.301  75.653  1.00  0.00      chA   
ATOM     38  HZ3 LYS c  84       1.944  28.806  75.941  1.00  0.00      chA   
ATOM     39  C   LYS c  84       7.265  30.214  78.267  1.00  0.00      chA   
ATOM     40  O   LYS c  84       6.736  29.123  78.578  1.00  0.00      chA   
ATOM     41  N   LEU c  85       8.274  30.751  78.977  1.00  0.00      chA   
ATOM     42  H   LEU c  85       8.769  31.622  78.852  1.00  0.00      chA   
ATOM     43  CA  LEU c  85       8.794  30.040  80.172  1.00  0.00      chA   
ATOM     44  HA  LEU c  85       9.562  30.645  80.654  1.00  0.00      chA   
ATOM     45  CB  LEU c  85       7.678  29.896  81.203  1.00  0.00      chA   
ATOM     46  HB2 LEU c  85       6.852  30.572  80.982  1.00  0.00      chA   
ATOM     47  HB3 LEU c  85       7.192  28.925  81.104  1.00  0.00      chA   
ATOM     48  CG  LEU c  85       8.254  29.983  82.646  1.00  0.00      chA   
ATOM     49  HG  LEU c  85       9.143  29.351  82.636  1.00  0.00      chA   
ATOM     50  CD1 LEU c  85       8.551  31.429  83.223  1.00  0.00      chA   
ATOM     51 HD11 LEU c  85       9.002  31.401  84.215  1.00  0.00      chA   
ATOM     52 HD12 LEU c  85       9.200  31.992  82.552  1.00  0.00      chA   
ATOM     53 HD13 LEU c  85       7.623  32.001  83.261  1.00  0.00      chA   
ATOM     54  CD2 LEU c  85       7.234  29.394  83.587  1.00  0.00      chA   
ATOM     55 HD21 LEU c  85       7.041  28.350  83.340  1.00  0.00      chA   
ATOM     56 HD22 LEU c  85       7.650  29.318  84.591  1.00  0.00      chA   
ATOM     57 HD23 LEU c  85       6.319  29.983  83.547  1.00  0.00      chA   
ATOM     58  C   LEU c  85       9.364  28.644  79.936  1.00  0.00      chA   
ATOM     59  O   LEU c  85       9.236  27.732  80.784  1.00  0.00      chA   
ATOM     60  N   ALA c  86      10.117  28.426  78.874  1.00  0.00      chA   
ATOM     61  H   ALA c  86      10.244  29.140  78.170  1.00  0.00      chA   
ATOM     62  CA  ALA c  86      10.860  27.191  78.642  1.00  0.00      chA   
ATOM     63  HA  ALA c  86      10.093  26.450  78.417  1.00  0.00      chA   
ATOM     64  CB  ALA c  86      11.674  27.425  77.326  1.00  0.00      chA   
ATOM     65  HB1 ALA c  86      12.195  26.509  77.049  1.00  0.00      chA   
ATOM     66  HB2 ALA c  86      11.008  27.778  76.538  1.00  0.00      chA   
ATOM     67  HB3 ALA c  86      12.438  28.201  77.321  1.00  0.00      chA   
ATOM     68  C   ALA c  86      11.692  26.592  79.770  1.00  0.00      chA   
ATOM     69  O   ALA c  86      12.119  27.253  80.713  1.00  0.00      chA   
ATOM     70  N   GLY c  87      11.930  25.280  79.628  1.00  0.00      chA   
ATOM     71  H   GLY c  87      11.528  24.786  78.843  1.00  0.00      chA   
ATOM     72  CA  GLY c  87      12.829  24.508  80.555  1.00  0.00      chA   
ATOM     73  HA2 GLY c  87      13.717  25.090  80.803  1.00  0.00      chA   
ATOM     74  HA3 GLY c  87      12.284  24.333  81.482  1.00  0.00      chA   
ATOM     75  C   GLY c  87      13.168  23.098  80.032  1.00  0.00      chA   
ATOM     76  O   GLY c  87      13.424  22.181  80.793  1.00  0.00      chA   
ATOM     77  N   ASN c  88      13.186  22.900  78.751  1.00  0.00      chA   
ATOM     78  H   ASN c  88      12.676  23.497  78.116  1.00  0.00      chA   
ATOM     79  CA  ASN c  88      14.022  21.874  78.068  1.00  0.00      chA   
ATOM     80  HA  ASN c  88      13.858  20.883  78.491  1.00  0.00      chA   
ATOM     81  CB  ASN c  88      13.535  21.650  76.678  1.00  0.00      chA   
ATOM     82  HB2 ASN c  88      12.463  21.464  76.720  1.00  0.00      chA   
ATOM     83  HB3 ASN c  88      13.648  22.593  76.146  1.00  0.00      chA   
ATOM     84  CG  ASN c  88      14.346  20.521  75.990  1.00  0.00      chA   
ATOM     85  OD1 ASN c  88      14.907  19.612  76.618  1.00  0.00      chA   
ATOM     86  ND2 ASN c  88      14.303  20.455  74.672  1.00  0.00      chA   
ATOM     87 HD21 ASN c  88      14.702  19.621  74.267  1.00  0.00      chA   
ATOM     88 HD22 ASN c  88      13.794  21.153  74.149  1.00  0.00      chA   
ATOM     89  C   ASN c  88      15.549  22.230  78.202  1.00  0.00      chA   
ATOM     90  O   ASN c  88      16.249  22.527  77.211  1.00  0.00      chA   
ATOM     91  N   SER c  89      16.045  22.262  79.441  1.00  0.00      chA   
ATOM     92  H   SER c  89      15.508  21.847  80.190  1.00  0.00      chA   
ATOM     93  CA  SER c  89      17.354  22.820  79.814  1.00  0.00      chA   
ATOM     94  HA  SER c  89      18.208  22.693  79.150  1.00  0.00      chA   
ATOM     95  CB  SER c  89      17.244  24.325  80.120  1.00  0.00      chA   
ATOM     96  HB2 SER c  89      16.410  24.372  80.819  1.00  0.00      chA   
ATOM     97  HB3 SER c  89      18.087  24.743  80.671  1.00  0.00      chA   
ATOM     98  OG  SER c  89      16.980  25.061  78.933  1.00  0.00      chA   
ATOM     99  HG  SER c  89      17.705  24.787  78.366  1.00  0.00      chA   
ATOM    100  C   SER c  89      17.918  22.184  81.110  1.00  0.00      chA   
ATOM    101  O   SER c  89      17.128  21.745  81.989  1.00  0.00      chA   
ATOM    102  N   SER c  90      19.253  22.063  81.180  1.00  0.00      chA   
ATOM    103  H   SER c  90      19.837  22.224  80.373  1.00  0.00      chA   
ATOM    104  CA  SER c  90      19.971  21.539  82.367  1.00  0.00      chA   
ATOM    105  HA  SER c  90      19.603  20.520  82.487  1.00  0.00      chA   
ATOM    106  CB  SER c  90      21.472  21.458  82.103  1.00  0.00      chA   
ATOM    107  HB2 SER c  90      21.885  22.467  82.095  1.00  0.00      chA   
ATOM    108  HB3 SER c  90      21.917  21.110  83.036  1.00  0.00      chA   
ATOM    109  OG  SER c  90      21.854  20.612  81.046  1.00  0.00      chA   
ATOM    110  HG  SER c  90      22.800  20.773  81.061  1.00  0.00      chA   
ATOM    111  C   SER c  90      19.746  22.405  83.607  1.00  0.00      chA   
ATOM    112  O   SER c  90      19.603  23.616  83.422  1.00  0.00      chA   
ATOM    113  N   LEU c  91      19.848  21.855  84.796  1.00  0.00      chA   
ATOM    114  H   LEU c  91      19.953  20.872  85.000  1.00  0.00      chA   
ATOM    115  CA  LEU c  91      20.170  22.691  85.930  1.00  0.00      chA   
ATOM    116  HA  LEU c  91      19.526  23.567  86.017  1.00  0.00      chA   
ATOM    117  CB  LEU c  91      20.273  21.898  87.251  1.00  0.00      chA   
ATOM    118  HB2 LEU c  91      21.008  21.124  87.028  1.00  0.00      chA   
ATOM    119  HB3 LEU c  91      20.743  22.495  88.034  1.00  0.00      chA   
ATOM    120  CG  LEU c  91      18.934  21.378  87.849  1.00  0.00      chA   
ATOM    121  HG  LEU c  91      18.519  20.622  87.182  1.00  0.00      chA   
ATOM    122  CD1 LEU c  91      19.267  20.610  89.124  1.00  0.00      chA   
ATOM    123 HD11 LEU c  91      20.003  19.846  88.875  1.00  0.00      chA   
ATOM    124 HD12 LEU c  91      19.527  21.235  89.980  1.00  0.00      chA   
ATOM    125 HD13 LEU c  91      18.421  20.069  89.549  1.00  0.00      chA   
ATOM    126  CD2 LEU c  91      17.843  22.385  88.308  1.00  0.00      chA   
ATOM    127 HD21 LEU c  91      18.284  23.245  88.812  1.00  0.00      chA   
ATOM    128 HD22 LEU c  91      17.240  22.886  87.550  1.00  0.00      chA   
ATOM    129 HD23 LEU c  91      17.207  21.895  89.046  1.00  0.00      chA   
ATOM    130  C   LEU c  91      21.538  23.425  85.689  1.00  0.00      chA   
ATOM    131  O   LEU c  91      22.385  22.744  85.055  1.00  0.00      chA   
ATOM    132  N   CYX c  92      21.603  24.635  86.184  1.00  0.00      chA   
ATOM    133  H   CYX c  92      20.805  25.149  86.529  1.00  0.00      chA   
ATOM    134  CA  CYX c  92      22.852  25.352  85.927  1.00  0.00      chA   
ATOM    135  HA  CYX c  92      23.100  25.324  84.866  1.00  0.00      chA   
ATOM    136  CB  CYX c  92      22.687  26.772  86.473  1.00  0.00      chA   
ATOM    137  HB2 CYX c  92      22.400  26.809  87.524  1.00  0.00      chA   
ATOM    138  HB3 CYX c  92      23.584  27.375  86.338  1.00  0.00      chA   
ATOM    139  SG  CYX c  92      21.414  27.660  85.523  1.00  0.00      chA   
ATOM    140  C   CYX c  92      23.996  24.732  86.772  1.00  0.00      chA   
ATOM    141  O   CYX c  92      23.724  24.122  87.841  1.00  0.00      chA   
ATOM    142  N   PRO c  93      25.247  24.840  86.262  1.00  0.00      chA   
ATOM    143  CD  PRO c  93      25.701  25.282  84.913  1.00  0.00      chA   
ATOM    144  HD2 PRO c  93      25.251  26.224  84.596  1.00  0.00      chA   
ATOM    145  HD3 PRO c  93      25.539  24.484  84.189  1.00  0.00      chA   
ATOM    146  CG  PRO c  93      27.185  25.494  85.098  1.00  0.00      chA   
ATOM    147  HG2 PRO c  93      27.335  26.417  85.657  1.00  0.00      chA   
ATOM    148  HG3 PRO c  93      27.694  25.676  84.151  1.00  0.00      chA   
ATOM    149  CB  PRO c  93      27.560  24.301  86.048  1.00  0.00      chA   
ATOM    150  HB2 PRO c  93      28.520  24.465  86.538  1.00  0.00      chA   
ATOM    151  HB3 PRO c  93      27.516  23.376  85.474  1.00  0.00      chA   
ATOM    152  CA  PRO c  93      26.406  24.377  87.044  1.00  0.00      chA   
ATOM    153  HA  PRO c  93      26.288  23.376  87.457  1.00  0.00      chA   
ATOM    154  C   PRO c  93      26.681  25.305  88.200  1.00  0.00      chA   
ATOM    155  O   PRO c  93      26.492  26.548  88.104  1.00  0.00      chA   
ATOM    156  N   ILE c  94      27.070  24.693  89.291  1.00  0.00      chA   
ATOM    157  H   ILE c  94      27.064  23.688  89.190  1.00  0.00      chA   
ATOM    158  CA  ILE c  94      27.247  25.264  90.580  1.00  0.00      chA   
ATOM    159  HA  ILE c  94      27.400  26.341  90.526  1.00  0.00      chA   
ATOM    160  CB  ILE c  94      25.951  25.096  91.455  1.00  0.00      chA   
ATOM    161  HB  ILE c  94      26.186  25.522  92.429  1.00  0.00      chA   
ATOM    162  CG2 ILE c  94      24.844  26.061  90.911  1.00  0.00      chA   
ATOM    163 HG21 ILE c  94      24.172  26.302  91.736  1.00  0.00      chA   
ATOM    164 HG22 ILE c  94      25.316  26.968  90.533  1.00  0.00      chA   
ATOM    165 HG23 ILE c  94      24.209  25.566  90.177  1.00  0.00      chA   
ATOM    166  CG1 ILE c  94      25.544  23.708  91.879  1.00  0.00      chA   
ATOM    167 HG12 ILE c  94      24.921  23.270  91.098  1.00  0.00      chA   
ATOM    168 HG13 ILE c  94      26.392  23.141  92.261  1.00  0.00      chA   
ATOM    169  CD1 ILE c  94      24.515  23.735  92.999  1.00  0.00      chA   
ATOM    170 HD11 ILE c  94      24.752  24.473  93.765  1.00  0.00      chA   
ATOM    171 HD12 ILE c  94      23.611  23.927  92.421  1.00  0.00      chA   
ATOM    172 HD13 ILE c  94      24.442  22.713  93.369  1.00  0.00      chA   
ATOM    173  C   ILE c  94      28.410  24.705  91.393  1.00  0.00      chA   
ATOM    174  O   ILE c  94      29.019  23.695  91.030  1.00  0.00      chA   
ATOM    175  N   ASN c  95      28.896  25.459  92.362  1.00  0.00      chA   
ATOM    176  H   ASN c  95      28.464  26.371  92.403  1.00  0.00      chA   
ATOM    177  CA  ASN c  95      30.074  25.182  93.266  1.00  0.00      chA   
ATOM    178  HA  ASN c  95      30.247  24.108  93.204  1.00  0.00      chA   
ATOM    179  CB  ASN c  95      31.351  25.859  92.746  1.00  0.00      chA   
ATOM    180  HB2 ASN c  95      31.674  25.381  91.822  1.00  0.00      chA   
ATOM    181  HB3 ASN c  95      31.003  26.881  92.591  1.00  0.00      chA   
ATOM    182  CG  ASN c  95      32.558  25.728  93.680  1.00  0.00      chA   
ATOM    183  OD1 ASN c  95      32.955  24.616  94.008  1.00  0.00      chA   
ATOM    184  ND2 ASN c  95      33.018  26.864  94.257  1.00  0.00      chA   
ATOM    185 HD21 ASN c  95      33.754  26.743  94.938  1.00  0.00      chA   
ATOM    186 HD22 ASN c  95      32.738  27.790  93.965  1.00  0.00      chA   
ATOM    187  C   ASN c  95      29.752  25.547  94.750  1.00  0.00      chA   
ATOM    188  O   ASN c  95      30.442  25.211  95.655  1.00  0.00      chA   
ATOM    189  N   GLY c  96      28.622  26.125  95.053  1.00  0.00      chA   
ATOM    190  H   GLY c  96      27.989  26.327  94.293  1.00  0.00      chA   
ATOM    191  CA  GLY c  96      28.163  26.614  96.352  1.00  0.00      chA   
ATOM    192  HA2 GLY c  96      27.877  25.671  96.817  1.00  0.00      chA   
ATOM    193  HA3 GLY c  96      28.981  27.045  96.931  1.00  0.00      chA   
ATOM    194  C   GLY c  96      26.834  27.461  96.152  1.00  0.00      chA   
ATOM    195  O   GLY c  96      26.255  27.460  95.073  1.00  0.00      chA   
ATOM    196  N   TRP c  97      26.321  28.033  97.229  1.00  0.00      chA   
ATOM    197  H   TRP c  97      26.684  27.738  98.125  1.00  0.00      chA   
ATOM    198  CA  TRP c  97      25.064  28.750  97.211  1.00  0.00      chA   
ATOM    199  HA  TRP c  97      24.622  28.862  96.221  1.00  0.00      chA   
ATOM    200  CB  TRP c  97      24.015  27.853  97.879  1.00  0.00      chA   
ATOM    201  HB2 TRP c  97      24.071  27.948  98.963  1.00  0.00      chA   
ATOM    202  HB3 TRP c  97      23.040  28.214  97.551  1.00  0.00      chA   
ATOM    203  CG  TRP c  97      24.002  26.426  97.355  1.00  0.00      chA   
ATOM    204  CD1 TRP c  97      24.887  25.416  97.537  1.00  0.00      chA   
ATOM    205  HD1 TRP c  97      25.855  25.458  98.014  1.00  0.00      chA   
ATOM    206  NE1 TRP c  97      24.486  24.265  96.892  1.00  0.00      chA   
ATOM    207  HE1 TRP c  97      25.099  23.475  96.744  1.00  0.00      chA   
ATOM    208  CE2 TRP c  97      23.291  24.438  96.334  1.00  0.00      chA   
ATOM    209  CZ2 TRP c  97      22.425  23.582  95.645  1.00  0.00      chA   
ATOM    210  HZ2 TRP c  97      22.749  22.573  95.437  1.00  0.00      chA   
ATOM    211  CH2 TRP c  97      21.160  23.944  95.261  1.00  0.00      chA   
ATOM    212  HH2 TRP c  97      20.584  23.193  94.739  1.00  0.00      chA   
ATOM    213  CZ3 TRP c  97      20.756  25.267  95.589  1.00  0.00      chA   
ATOM    214  HZ3 TRP c  97      19.784  25.536  95.201  1.00  0.00      chA   
ATOM    215  CE3 TRP c  97      21.579  26.148  96.258  1.00  0.00      chA   
ATOM    216  HE3 TRP c  97      21.211  27.153  96.405  1.00  0.00      chA   
ATOM    217  CD2 TRP c  97      22.866  25.765  96.680  1.00  0.00      chA   
ATOM    218  C   TRP c  97      25.117  30.147  97.867  1.00  0.00      chA   
ATOM    219  O   TRP c  97      25.846  30.415  98.785  1.00  0.00      chA   
ATOM    220  N   ALA c  98      24.273  31.113  97.370  1.00  0.00      chA   
ATOM    221  H   ALA c  98      23.707  30.972  96.545  1.00  0.00      chA   
ATOM    222  CA  ALA c  98      24.462  32.577  97.685  1.00  0.00      chA   
ATOM    223  HA  ALA c  98      25.320  32.754  98.333  1.00  0.00      chA   
ATOM    224  CB  ALA c  98      24.798  33.292  96.344  1.00  0.00      chA   
ATOM    225  HB1 ALA c  98      25.004  34.360  96.410  1.00  0.00      chA   
ATOM    226  HB2 ALA c  98      25.719  32.795  96.037  1.00  0.00      chA   
ATOM    227  HB3 ALA c  98      24.100  33.101  95.528  1.00  0.00      chA   
ATOM    228  C   ALA c  98      23.083  33.091  98.217  1.00  0.00      chA   
ATOM    229  O   ALA c  98      22.059  32.737  97.662  1.00  0.00      chA   
ATOM    230  N   VAL c  99      23.076  33.795  99.389  1.00  0.00      chA   
ATOM    231  H   VAL c  99      23.991  34.081  99.708  1.00  0.00      chA   
ATOM    232  CA  VAL c  99      21.843  34.177 100.131  1.00  0.00      chA   
ATOM    233  HA  VAL c  99      21.152  33.334 100.108  1.00  0.00      chA   
ATOM    234  CB  VAL c  99      22.132  34.632 101.623  1.00  0.00      chA   
ATOM    235  HB  VAL c  99      22.673  33.787 102.048  1.00  0.00      chA   
ATOM    236  CG1 VAL c  99      22.847  35.996 101.582  1.00  0.00      chA   
ATOM    237 HG11 VAL c  99      23.703  36.017 100.906  1.00  0.00      chA   
ATOM    238 HG12 VAL c  99      22.125  36.688 101.149  1.00  0.00      chA   
ATOM    239 HG13 VAL c  99      23.117  36.359 102.574  1.00  0.00      chA   
ATOM    240  CG2 VAL c  99      20.909  34.847 102.417  1.00  0.00      chA   
ATOM    241 HG21 VAL c  99      20.283  35.632 101.994  1.00  0.00      chA   
ATOM    242 HG22 VAL c  99      20.334  33.934 102.266  1.00  0.00      chA   
ATOM    243 HG23 VAL c  99      20.974  34.884 103.504  1.00  0.00      chA   
ATOM    244  C   VAL c  99      20.997  35.200  99.359  1.00  0.00      chA   
ATOM    245  O   VAL c  99      21.488  36.252  98.862  1.00  0.00      chA   
ATOM    246  N   TYR c 100      19.648  34.945  99.388  1.00  0.00      chA   
ATOM    247  H   TYR c 100      19.217  34.107  99.750  1.00  0.00      chA   
ATOM    248  CA  TYR c 100      18.701  35.738  98.586  1.00  0.00      chA   
ATOM    249  HA  TYR c 100      19.189  36.634  98.201  1.00  0.00      chA   
ATOM    250  CB  TYR c 100      18.200  34.882  97.383  1.00  0.00      chA   
ATOM    251  HB2 TYR c 100      18.961  34.404  96.765  1.00  0.00      chA   
ATOM    252  HB3 TYR c 100      17.606  34.105  97.864  1.00  0.00      chA   
ATOM    253  CG  TYR c 100      17.324  35.473  96.369  1.00  0.00      chA   
ATOM    254  CD1 TYR c 100      17.764  36.618  95.689  1.00  0.00      chA   
ATOM    255  HD1 TYR c 100      18.641  37.154  96.020  1.00  0.00      chA   
ATOM    256  CE1 TYR c 100      16.956  37.060  94.598  1.00  0.00      chA   
ATOM    257  HE1 TYR c 100      17.283  37.977  94.132  1.00  0.00      chA   
ATOM    258  CZ  TYR c 100      15.846  36.244  94.196  1.00  0.00      chA   
ATOM    259  OH  TYR c 100      15.068  36.715  93.197  1.00  0.00      chA   
ATOM    260  HH  TYR c 100      15.182  37.662  93.091  1.00  0.00      chA   
ATOM    261  CE2 TYR c 100      15.526  35.038  94.860  1.00  0.00      chA   
ATOM    262  HE2 TYR c 100      14.705  34.435  94.502  1.00  0.00      chA   
ATOM    263  CD2 TYR c 100      16.196  34.727  95.998  1.00  0.00      chA   
ATOM    264  HD2 TYR c 100      16.056  33.786  96.510  1.00  0.00      chA   
ATOM    265  C   TYR c 100      17.552  36.324  99.420  1.00  0.00      chA   
ATOM    266  O   TYR c 100      16.911  37.207  98.939  1.00  0.00      chA   
ATOM    267  N   SER c 101      17.373  35.946 100.676  1.00  0.00      chA   
ATOM    268  H   SER c 101      17.887  35.161 101.049  1.00  0.00      chA   
ATOM    269  CA  SER c 101      16.301  36.473 101.525  1.00  0.00      chA   
ATOM    270  HA  SER c 101      16.303  37.550 101.358  1.00  0.00      chA   
ATOM    271  CB  SER c 101      14.907  36.060 101.144  1.00  0.00      chA   
ATOM    272  HB2 SER c 101      14.204  36.823 101.482  1.00  0.00      chA   
ATOM    273  HB3 SER c 101      14.766  35.953 100.069  1.00  0.00      chA   
ATOM    274  OG  SER c 101      14.676  34.760 101.699  1.00  0.00      chA   
ATOM    275  HG  SER c 101      13.998  34.869 102.371  1.00  0.00      chA   
ATOM    276  C   SER c 101      16.467  36.314 103.049  1.00  0.00      chA   
ATOM    277  O   SER c 101      16.947  35.309 103.544  1.00  0.00      chA   
ATOM    278  N   LYS c 102      15.888  37.288 103.885  1.00  0.00      chA   
ATOM    279  H   LYS c 102      15.603  38.124 103.394  1.00  0.00      chA   
ATOM    280  CA  LYS c 102      15.614  37.242 105.320  1.00  0.00      chA   
ATOM    281  HA  LYS c 102      15.271  36.273 105.684  1.00  0.00      chA   
ATOM    282  CB  LYS c 102      16.884  37.478 106.172  1.00  0.00      chA   
ATOM    283  HB2 LYS c 102      17.765  37.006 105.739  1.00  0.00      chA   
ATOM    284  HB3 LYS c 102      17.067  38.551 106.103  1.00  0.00      chA   
ATOM    285  CG  LYS c 102      16.700  37.099 107.623  1.00  0.00      chA   
ATOM    286  HG2 LYS c 102      15.939  37.705 108.113  1.00  0.00      chA   
ATOM    287  HG3 LYS c 102      16.337  36.074 107.701  1.00  0.00      chA   
ATOM    288  CD  LYS c 102      18.001  37.206 108.425  1.00  0.00      chA   
ATOM    289  HD2 LYS c 102      18.812  36.794 107.825  1.00  0.00      chA   
ATOM    290  HD3 LYS c 102      18.239  38.265 108.530  1.00  0.00      chA   
ATOM    291  CE  LYS c 102      18.051  36.400 109.722  1.00  0.00      chA   
ATOM    292  HE2 LYS c 102      17.920  35.331 109.557  1.00  0.00      chA   
ATOM    293  HE3 LYS c 102      18.991  36.609 110.235  1.00  0.00      chA   
ATOM    294  NZ  LYS c 102      16.837  36.672 110.532  1.00  0.00      chA   
ATOM    295  HZ1 LYS c 102      16.795  36.304 111.471  1.00  0.00      chA   
ATOM    296  HZ2 LYS c 102      16.647  37.656 110.658  1.00  0.00      chA   
ATOM    297  HZ3 LYS c 102      16.037  36.260 110.075  1.00  0.00      chA   
ATOM    298  C   LYS c 102      14.579  38.355 105.763  1.00  0.00      chA   
ATOM    299  O   LYS c 102      15.021  39.491 105.756  1.00  0.00      chA   
ATOM    300  N   ASP c 103      13.357  37.996 106.111  1.00  0.00      chA   
ATOM    301  H   ASP c 103      13.079  37.065 105.835  1.00  0.00      chA   
ATOM    302  CA  ASP c 103      12.275  38.978 106.380  1.00  0.00      chA   
ATOM    303  HA  ASP c 103      12.486  39.909 105.853  1.00  0.00      chA   
ATOM    304  CB  ASP c 103      10.912  38.442 105.877  1.00  0.00      chA   
ATOM    305  HB2 ASP c 103      10.110  39.179 105.838  1.00  0.00      chA   
ATOM    306  HB3 ASP c 103      11.043  38.106 104.849  1.00  0.00      chA   
ATOM    307  CG  ASP c 103      10.485  37.254 106.748  1.00  0.00      chA   
ATOM    308  OD1 ASP c 103      10.742  36.176 106.222  1.00  0.00      chA   
ATOM    309  OD2 ASP c 103       9.945  37.418 107.885  1.00  0.00      chA   
ATOM    310  C   ASP c 103      12.025  39.479 107.816  1.00  0.00      chA   
ATOM    311  O   ASP c 103      11.316  40.468 107.945  1.00  0.00      chA   
ATOM    312  N   ASN c 104      12.732  38.854 108.754  1.00  0.00      chA   
ATOM    313  H   ASN c 104      13.236  38.051 108.401  1.00  0.00      chA   
ATOM    314  CA  ASN c 104      12.775  39.160 110.177  1.00  0.00      chA   
ATOM    315  HA  ASN c 104      13.248  38.274 110.600  1.00  0.00      chA   
ATOM    316  CB  ASN c 104      13.672  40.336 110.406  1.00  0.00      chA   
ATOM    317  HB2 ASN c 104      13.419  41.165 109.746  1.00  0.00      chA   
ATOM    318  HB3 ASN c 104      13.563  40.627 111.451  1.00  0.00      chA   
ATOM    319  CG  ASN c 104      15.182  40.226 110.163  1.00  0.00      chA   
ATOM    320  OD1 ASN c 104      15.874  39.254 110.483  1.00  0.00      chA   
ATOM    321  ND2 ASN c 104      15.763  41.189 109.443  1.00  0.00      chA   
ATOM    322 HD21 ASN c 104      16.772  41.210 109.422  1.00  0.00      chA   
ATOM    323 HD22 ASN c 104      15.146  41.872 109.029  1.00  0.00      chA   
ATOM    324  C   ASN c 104      11.449  39.304 110.876  1.00  0.00      chA   
ATOM    325  O   ASN c 104      11.513  39.711 112.060  1.00  0.00      chA   
ATOM    326  N   SER c 105      10.284  39.081 110.253  1.00  0.00      chA   
ATOM    327  H   SER c 105      10.360  38.691 109.325  1.00  0.00      chA   
ATOM    328  CA  SER c 105       8.903  39.342 110.854  1.00  0.00      chA   
ATOM    329  HA  SER c 105       8.717  40.391 110.625  1.00  0.00      chA   
ATOM    330  CB  SER c 105       7.870  38.492 110.045  1.00  0.00      chA   
ATOM    331  HB2 SER c 105       6.904  38.549 110.545  1.00  0.00      chA   
ATOM    332  HB3 SER c 105       7.870  38.867 109.021  1.00  0.00      chA   
ATOM    333  OG  SER c 105       8.255  37.130 109.887  1.00  0.00      chA   
ATOM    334  HG  SER c 105       8.688  37.121 109.031  1.00  0.00      chA   
ATOM    335  C   SER c 105       8.661  39.179 112.426  1.00  0.00      chA   
ATOM    336  O   SER c 105       8.188  40.123 113.104  1.00  0.00      chA   
ATOM    337  N   ILE c 106       9.064  38.142 113.173  1.00  0.00      chA   
ATOM    338  H   ILE c 106       9.547  37.382 112.713  1.00  0.00      chA   
ATOM    339  CA  ILE c 106       8.978  37.981 114.647  1.00  0.00      chA   
ATOM    340  HA  ILE c 106       8.021  38.286 115.071  1.00  0.00      chA   
ATOM    341  CB  ILE c 106       9.088  36.467 114.962  1.00  0.00      chA   
ATOM    342  HB  ILE c 106       9.160  36.278 116.034  1.00  0.00      chA   
ATOM    343  CG2 ILE c 106       7.775  35.781 114.503  1.00  0.00      chA   
ATOM    344 HG21 ILE c 106       6.885  36.316 114.833  1.00  0.00      chA   
ATOM    345 HG22 ILE c 106       7.682  35.819 113.418  1.00  0.00      chA   
ATOM    346 HG23 ILE c 106       7.706  34.736 114.808  1.00  0.00      chA   
ATOM    347  CG1 ILE c 106      10.214  35.756 114.138  1.00  0.00      chA   
ATOM    348 HG12 ILE c 106      10.114  35.824 113.054  1.00  0.00      chA   
ATOM    349 HG13 ILE c 106      11.105  36.311 114.433  1.00  0.00      chA   
ATOM    350  CD1 ILE c 106      10.472  34.190 114.387  1.00  0.00      chA   
ATOM    351 HD11 ILE c 106      11.219  33.736 113.736  1.00  0.00      chA   
ATOM    352 HD12 ILE c 106      10.766  34.103 115.434  1.00  0.00      chA   
ATOM    353 HD13 ILE c 106       9.550  33.617 114.296  1.00  0.00      chA   
ATOM    354  C   ILE c 106      10.063  38.689 115.485  1.00  0.00      chA   
ATOM    355  O   ILE c 106      10.087  38.502 116.753  1.00  0.00      chA   
ATOM    356  N   ARG c 107      10.884  39.504 114.823  1.00  0.00      chA   
ATOM    357  H   ARG c 107      10.913  39.325 113.830  1.00  0.00      chA   
ATOM    358  CA  ARG c 107      11.838  40.489 115.459  1.00  0.00      chA   
ATOM    359  HA  ARG c 107      11.801  40.360 116.541  1.00  0.00      chA   
ATOM    360  CB  ARG c 107      13.235  40.282 114.830  1.00  0.00      chA   
ATOM    361  HB2 ARG c 107      13.567  39.267 115.049  1.00  0.00      chA   
ATOM    362  HB3 ARG c 107      13.112  40.533 113.778  1.00  0.00      chA   
ATOM    363  CG  ARG c 107      14.334  41.205 115.373  1.00  0.00      chA   
ATOM    364  HG2 ARG c 107      14.171  42.263 115.169  1.00  0.00      chA   
ATOM    365  HG3 ARG c 107      14.405  41.015 116.444  1.00  0.00      chA   
ATOM    366  CD  ARG c 107      15.666  40.990 114.587  1.00  0.00      chA   
ATOM    367  HD2 ARG c 107      16.003  39.979 114.817  1.00  0.00      chA   
ATOM    368  HD3 ARG c 107      15.282  41.092 113.572  1.00  0.00      chA   
ATOM    369  NE  ARG c 107      16.684  41.928 114.923  1.00  0.00      chA   
ATOM    370  HE  ARG c 107      16.985  42.513 114.156  1.00  0.00      chA   
ATOM    371  CZ  ARG c 107      17.399  42.175 116.031  1.00  0.00      chA   
ATOM    372  NH1 ARG c 107      18.184  43.229 116.144  1.00  0.00      chA   
ATOM    373 HH11 ARG c 107      18.259  43.971 115.462  1.00  0.00      chA   
ATOM    374 HH12 ARG c 107      18.756  43.298 116.974  1.00  0.00      chA   
ATOM    375  NH2 ARG c 107      17.227  41.560 117.159  1.00  0.00      chA   
ATOM    376 HH21 ARG c 107      16.761  40.667 117.243  1.00  0.00      chA   
ATOM    377 HH22 ARG c 107      17.799  41.762 117.965  1.00  0.00      chA   
ATOM    378  C   ARG c 107      11.189  41.908 115.203  1.00  0.00      chA   
ATOM    379  O   ARG c 107      11.532  42.893 115.883  1.00  0.00      chA   
ATOM    380  N   ILE c 108      10.167  42.066 114.331  1.00  0.00      chA   
ATOM    381  H   ILE c 108       9.934  41.238 113.801  1.00  0.00      chA   
ATOM    382  CA  ILE c 108       9.435  43.289 113.986  1.00  0.00      chA   
ATOM    383  HA  ILE c 108       9.992  44.162 114.328  1.00  0.00      chA   
ATOM    384  CB  ILE c 108       9.346  43.506 112.461  1.00  0.00      chA   
ATOM    385  HB  ILE c 108       9.030  42.580 111.980  1.00  0.00      chA   
ATOM    386  CG2 ILE c 108       8.384  44.609 112.010  1.00  0.00      chA   
ATOM    387 HG21 ILE c 108       8.581  45.611 112.393  1.00  0.00      chA   
ATOM    388 HG22 ILE c 108       8.366  44.613 110.920  1.00  0.00      chA   
ATOM    389 HG23 ILE c 108       7.322  44.417 112.163  1.00  0.00      chA   
ATOM    390  CG1 ILE c 108      10.736  43.776 111.769  1.00  0.00      chA   
ATOM    391 HG12 ILE c 108      10.958  44.839 111.869  1.00  0.00      chA   
ATOM    392 HG13 ILE c 108      11.451  43.210 112.366  1.00  0.00      chA   
ATOM    393  CD1 ILE c 108      10.889  43.293 110.348  1.00  0.00      chA   
ATOM    394 HD11 ILE c 108      11.867  43.554 109.942  1.00  0.00      chA   
ATOM    395 HD12 ILE c 108      10.807  42.212 110.237  1.00  0.00      chA   
ATOM    396 HD13 ILE c 108      10.263  43.840 109.641  1.00  0.00      chA   
ATOM    397  C   ILE c 108       8.051  43.321 114.693  1.00  0.00      chA   
ATOM    398  O   ILE c 108       7.678  44.448 115.010  1.00  0.00      chA   
ATOM    399  N   GLY c 109       7.364  42.209 114.929  1.00  0.00      chA   
ATOM    400  H   GLY c 109       7.768  41.336 114.619  1.00  0.00      chA   
ATOM    401  CA  GLY c 109       5.926  42.129 115.397  1.00  0.00      chA   
ATOM    402  HA2 GLY c 109       5.278  42.679 114.715  1.00  0.00      chA   
ATOM    403  HA3 GLY c 109       5.668  41.073 115.306  1.00  0.00      chA   
ATOM    404  C   GLY c 109       5.704  42.682 116.833  1.00  0.00      chA   
ATOM    405  O   GLY c 109       4.550  42.838 117.287  1.00  0.00      chA   
ATOM    406  N   SER c 110       6.740  42.837 117.618  1.00  0.00      chA   
ATOM    407  H   SER c 110       7.671  42.752 117.235  1.00  0.00      chA   
ATOM    408  CA  SER c 110       6.693  43.538 118.936  1.00  0.00      chA   
ATOM    409  HA  SER c 110       5.855  43.076 119.457  1.00  0.00      chA   
ATOM    410  CB  SER c 110       8.108  43.618 119.549  1.00  0.00      chA   
ATOM    411  HB2 SER c 110       8.216  44.314 120.381  1.00  0.00      chA   
ATOM    412  HB3 SER c 110       8.460  42.660 119.931  1.00  0.00      chA   
ATOM    413  OG  SER c 110       9.096  43.847 118.622  1.00  0.00      chA   
ATOM    414  HG  SER c 110       9.617  44.584 118.949  1.00  0.00      chA   
ATOM    415  C   SER c 110       6.287  45.037 118.776  1.00  0.00      chA   
ATOM    416  O   SER c 110       5.790  45.567 119.747  1.00  0.00      chA   
ATOM    417  N   LYS c 111       6.496  45.672 117.624  1.00  0.00      chA   
ATOM    418  H   LYS c 111       7.078  45.309 116.882  1.00  0.00      chA   
ATOM    419  CA  LYS c 111       6.049  47.031 117.350  1.00  0.00      chA   
ATOM    420  HA  LYS c 111       5.272  47.262 118.078  1.00  0.00      chA   
ATOM    421  CB  LYS c 111       7.262  47.984 117.582  1.00  0.00      chA   
ATOM    422  HB2 LYS c 111       7.631  47.794 118.590  1.00  0.00      chA   
ATOM    423  HB3 LYS c 111       8.093  47.721 116.927  1.00  0.00      chA   
ATOM    424  CG  LYS c 111       6.824  49.460 117.561  1.00  0.00      chA   
ATOM    425  HG2 LYS c 111       6.365  49.799 116.633  1.00  0.00      chA   
ATOM    426  HG3 LYS c 111       6.068  49.419 118.344  1.00  0.00      chA   
ATOM    427  CD  LYS c 111       8.008  50.408 117.976  1.00  0.00      chA   
ATOM    428  HD2 LYS c 111       8.379  50.206 118.981  1.00  0.00      chA   
ATOM    429  HD3 LYS c 111       8.799  50.406 117.226  1.00  0.00      chA   
ATOM    430  CE  LYS c 111       7.417  51.783 117.986  1.00  0.00      chA   
ATOM    431  HE2 LYS c 111       6.842  52.001 117.085  1.00  0.00      chA   
ATOM    432  HE3 LYS c 111       6.677  51.796 118.786  1.00  0.00      chA   
ATOM    433  NZ  LYS c 111       8.479  52.717 118.215  1.00  0.00      chA   
ATOM    434  HZ1 LYS c 111       8.177  53.677 118.297  1.00  0.00      chA   
ATOM    435  HZ2 LYS c 111       8.878  52.605 119.137  1.00  0.00      chA   
ATOM    436  HZ3 LYS c 111       9.197  52.549 117.524  1.00  0.00      chA   
ATOM    437  C   LYS c 111       5.281  47.248 116.023  1.00  0.00      chA   
ATOM    438  O   LYS c 111       4.317  47.942 115.868  1.00  0.00      chA   
ATOM    439  N   GLY c 112       5.604  46.497 114.947  1.00  0.00      chA   
ATOM    440  H   GLY c 112       6.331  45.809 115.084  1.00  0.00      chA   
ATOM    441  CA  GLY c 112       4.942  46.408 113.644  1.00  0.00      chA   
ATOM    442  HA2 GLY c 112       4.582  47.389 113.334  1.00  0.00      chA   
ATOM    443  HA3 GLY c 112       5.579  45.947 112.890  1.00  0.00      chA   
ATOM    444  C   GLY c 112       3.759  45.457 113.743  1.00  0.00      chA   
ATOM    445  O   GLY c 112       3.610  44.690 114.717  1.00  0.00      chA   
ATOM    446  N   ASP c 113       2.870  45.471 112.738  1.00  0.00      chA   
ATOM    447  H   ASP c 113       3.103  46.070 111.958  1.00  0.00      chA   
ATOM    448  CA  ASP c 113       1.571  44.842 112.711  1.00  0.00      chA   
ATOM    449  HA  ASP c 113       1.310  44.510 113.716  1.00  0.00      chA   
ATOM    450  CB  ASP c 113       0.529  45.847 112.277  1.00  0.00      chA   
ATOM    451  HB2 ASP c 113       0.855  46.320 111.351  1.00  0.00      chA   
ATOM    452  HB3 ASP c 113      -0.401  45.349 112.005  1.00  0.00      chA   
ATOM    453  CG  ASP c 113       0.222  46.905 113.405  1.00  0.00      chA   
ATOM    454  OD1 ASP c 113      -0.494  47.901 113.120  1.00  0.00      chA   
ATOM    455  OD2 ASP c 113       0.830  46.817 114.478  1.00  0.00      chA   
ATOM    456  C   ASP c 113       1.841  43.632 111.808  1.00  0.00      chA   
ATOM    457  O   ASP c 113       1.713  43.735 110.610  1.00  0.00      chA   
ATOM    458  N   VAL c 114       2.198  42.469 112.392  1.00  0.00      chA   
ATOM    459  H   VAL c 114       2.215  42.430 113.401  1.00  0.00      chA   
ATOM    460  CA  VAL c 114       2.557  41.283 111.588  1.00  0.00      chA   
ATOM    461  HA  VAL c 114       2.522  41.577 110.539  1.00  0.00      chA   
ATOM    462  CB  VAL c 114       4.009  40.750 111.650  1.00  0.00      chA   
ATOM    463  HB  VAL c 114       4.002  39.900 110.969  1.00  0.00      chA   
ATOM    464  CG1 VAL c 114       4.937  41.860 111.302  1.00  0.00      chA   
ATOM    465 HG11 VAL c 114       4.802  42.565 112.123  1.00  0.00      chA   
ATOM    466 HG12 VAL c 114       5.947  41.451 111.337  1.00  0.00      chA   
ATOM    467 HG13 VAL c 114       4.768  42.276 110.310  1.00  0.00      chA   
ATOM    468  CG2 VAL c 114       4.331  40.098 113.013  1.00  0.00      chA   
ATOM    469 HG21 VAL c 114       5.378  39.814 112.912  1.00  0.00      chA   
ATOM    470 HG22 VAL c 114       4.136  40.774 113.846  1.00  0.00      chA   
ATOM    471 HG23 VAL c 114       3.734  39.189 113.076  1.00  0.00      chA   
ATOM    472  C   VAL c 114       1.583  40.169 111.837  1.00  0.00      chA   
ATOM    473  O   VAL c 114       1.204  39.973 112.944  1.00  0.00      chA   
ATOM    474  N   PHE c 115       1.262  39.380 110.810  1.00  0.00      chA   
ATOM    475  H   PHE c 115       1.523  39.614 109.862  1.00  0.00      chA   
ATOM    476  CA  PHE c 115       0.580  38.080 110.980  1.00  0.00      chA   
ATOM    477  HA  PHE c 115      -0.363  38.335 111.463  1.00  0.00      chA   
ATOM    478  CB  PHE c 115       0.259  37.512 109.628  1.00  0.00      chA   
ATOM    479  HB2 PHE c 115       1.237  37.218 109.248  1.00  0.00      chA   
ATOM    480  HB3 PHE c 115      -0.187  36.542 109.847  1.00  0.00      chA   
ATOM    481  CG  PHE c 115      -0.586  38.333 108.661  1.00  0.00      chA   
ATOM    482  CD1 PHE c 115      -0.097  38.615 107.342  1.00  0.00      chA   
ATOM    483  HD1 PHE c 115       0.794  38.126 106.978  1.00  0.00      chA   
ATOM    484  CE1 PHE c 115      -0.857  39.379 106.424  1.00  0.00      chA   
ATOM    485  HE1 PHE c 115      -0.465  39.489 105.424  1.00  0.00      chA   
ATOM    486  CZ  PHE c 115      -2.099  39.934 106.795  1.00  0.00      chA   
ATOM    487  HZ  PHE c 115      -2.714  40.448 106.072  1.00  0.00      chA   
ATOM    488  CE2 PHE c 115      -2.480  39.805 108.132  1.00  0.00      chA   
ATOM    489  HE2 PHE c 115      -3.363  40.368 108.394  1.00  0.00      chA   
ATOM    490  CD2 PHE c 115      -1.766  38.986 109.032  1.00  0.00      chA   
ATOM    491  HD2 PHE c 115      -2.030  38.999 110.079  1.00  0.00      chA   
ATOM    492  C   PHE c 115       1.329  37.081 111.877  1.00  0.00      chA   
ATOM    493  O   PHE c 115       2.520  36.835 111.778  1.00  0.00      chA   
ATOM    494  N   VAL c 116       0.498  36.293 112.591  1.00  0.00      chA   
ATOM    495  H   VAL c 116      -0.504  36.382 112.498  1.00  0.00      chA   
ATOM    496  CA  VAL c 116       1.003  34.922 112.843  1.00  0.00      chA   
ATOM    497  HA  VAL c 116       1.996  34.855 113.290  1.00  0.00      chA   
ATOM    498  CB  VAL c 116       0.129  33.976 113.763  1.00  0.00      chA   
ATOM    499  HB  VAL c 116      -0.782  33.605 113.294  1.00  0.00      chA   
ATOM    500  CG1 VAL c 116       0.837  32.733 114.217  1.00  0.00      chA   
ATOM    501 HG11 VAL c 116       1.575  32.856 115.010  1.00  0.00      chA   
ATOM    502 HG12 VAL c 116       0.111  32.026 114.620  1.00  0.00      chA   
ATOM    503 HG13 VAL c 116       1.328  32.249 113.372  1.00  0.00      chA   
ATOM    504  CG2 VAL c 116      -0.239  34.733 114.988  1.00  0.00      chA   
ATOM    505 HG21 VAL c 116      -0.767  34.009 115.608  1.00  0.00      chA   
ATOM    506 HG22 VAL c 116       0.642  34.999 115.573  1.00  0.00      chA   
ATOM    507 HG23 VAL c 116      -0.934  35.517 114.691  1.00  0.00      chA   
ATOM    508  C   VAL c 116       1.125  34.188 111.514  1.00  0.00      chA   
ATOM    509  O   VAL c 116       0.051  34.026 110.870  1.00  0.00      chA   
ATOM    510  N   ILE c 117       2.257  33.714 111.118  1.00  0.00      chA   
ATOM    511  H   ILE c 117       3.028  33.794 111.764  1.00  0.00      chA   
ATOM    512  CA  ILE c 117       2.245  32.774 109.986  1.00  0.00      chA   
ATOM    513  HA  ILE c 117       1.236  32.510 109.672  1.00  0.00      chA   
ATOM    514  CB  ILE c 117       3.042  33.384 108.827  1.00  0.00      chA   
ATOM    515  HB  ILE c 117       2.874  32.709 107.988  1.00  0.00      chA   
ATOM    516  CG2 ILE c 117       2.392  34.690 108.336  1.00  0.00      chA   
ATOM    517 HG21 ILE c 117       1.326  34.507 108.195  1.00  0.00      chA   
ATOM    518 HG22 ILE c 117       2.620  35.445 109.088  1.00  0.00      chA   
ATOM    519 HG23 ILE c 117       2.841  35.088 107.426  1.00  0.00      chA   
ATOM    520  CG1 ILE c 117       4.507  33.508 109.195  1.00  0.00      chA   
ATOM    521 HG12 ILE c 117       4.720  34.347 109.857  1.00  0.00      chA   
ATOM    522 HG13 ILE c 117       4.841  32.612 109.716  1.00  0.00      chA   
ATOM    523  CD1 ILE c 117       5.379  33.670 107.914  1.00  0.00      chA   
ATOM    524 HD11 ILE c 117       6.272  34.168 108.292  1.00  0.00      chA   
ATOM    525 HD12 ILE c 117       5.515  32.635 107.601  1.00  0.00      chA   
ATOM    526 HD13 ILE c 117       4.882  34.152 107.073  1.00  0.00      chA   
ATOM    527  C   ILE c 117       2.852  31.422 110.406  1.00  0.00      chA   
ATOM    528  O   ILE c 117       3.400  31.356 111.498  1.00  0.00      chA   
ATOM    529  N   ARG c 118       2.873  30.426 109.544  1.00  0.00      chA   
ATOM    530  H   ARG c 118       2.269  30.580 108.749  1.00  0.00      chA   
ATOM    531  CA  ARG c 118       3.569  29.129 109.616  1.00  0.00      chA   
ATOM    532  HA  ARG c 118       4.552  29.388 110.009  1.00  0.00      chA   
ATOM    533  CB  ARG c 118       2.862  28.149 110.509  1.00  0.00      chA   
ATOM    534  HB2 ARG c 118       1.800  28.234 110.279  1.00  0.00      chA   
ATOM    535  HB3 ARG c 118       3.148  27.147 110.190  1.00  0.00      chA   
ATOM    536  CG  ARG c 118       3.163  28.163 111.953  1.00  0.00      chA   
ATOM    537  HG2 ARG c 118       2.561  28.960 112.390  1.00  0.00      chA   
ATOM    538  HG3 ARG c 118       2.841  27.182 112.302  1.00  0.00      chA   
ATOM    539  CD  ARG c 118       4.610  28.359 112.438  1.00  0.00      chA   
ATOM    540  HD2 ARG c 118       4.872  29.410 112.314  1.00  0.00      chA   
ATOM    541  HD3 ARG c 118       4.602  28.180 113.512  1.00  0.00      chA   
ATOM    542  NE  ARG c 118       5.554  27.424 111.851  1.00  0.00      chA   
ATOM    543  HE  ARG c 118       5.900  27.635 110.925  1.00  0.00      chA   
ATOM    544  CZ  ARG c 118       5.678  26.163 112.290  1.00  0.00      chA   
ATOM    545  NH1 ARG c 118       6.494  25.414 111.767  1.00  0.00      chA   
ATOM    546 HH11 ARG c 118       6.917  25.705 110.896  1.00  0.00      chA   
ATOM    547 HH12 ARG c 118       6.667  24.539 112.240  1.00  0.00      chA   
ATOM    548  NH2 ARG c 118       5.265  25.720 113.452  1.00  0.00      chA   
ATOM    549 HH21 ARG c 118       4.620  26.263 114.007  1.00  0.00      chA   
ATOM    550 HH22 ARG c 118       5.431  24.750 113.683  1.00  0.00      chA   
ATOM    551  C   ARG c 118       3.593  28.610 108.181  1.00  0.00      chA   
ATOM    552  O   ARG c 118       2.816  29.130 107.418  1.00  0.00      chA   
ATOM    553  N   GLU c 119       4.414  27.606 107.890  1.00  0.00      chA   
ATOM    554  H   GLU c 119       4.957  27.278 108.676  1.00  0.00      chA   
ATOM    555  CA  GLU c 119       4.624  26.995 106.560  1.00  0.00      chA   
ATOM    556  HA  GLU c 119       5.646  26.618 106.584  1.00  0.00      chA   
ATOM    557  CB  GLU c 119       3.855  25.707 106.389  1.00  0.00      chA   
ATOM    558  HB2 GLU c 119       4.129  25.355 105.396  1.00  0.00      chA   
ATOM    559  HB3 GLU c 119       4.365  25.014 107.058  1.00  0.00      chA   
ATOM    560  CG  GLU c 119       2.344  25.693 106.576  1.00  0.00      chA   
ATOM    561  HG2 GLU c 119       1.956  26.632 106.179  1.00  0.00      chA   
ATOM    562  HG3 GLU c 119       1.902  24.868 106.020  1.00  0.00      chA   
ATOM    563  CD  GLU c 119       1.891  25.475 108.097  1.00  0.00      chA   
ATOM    564  OE1 GLU c 119       1.125  26.244 108.639  1.00  0.00      chA   
ATOM    565  OE2 GLU c 119       2.259  24.357 108.595  1.00  0.00      chA   
ATOM    566  C   GLU c 119       4.653  28.064 105.468  1.00  0.00      chA   
ATOM    567  O   GLU c 119       3.826  28.099 104.541  1.00  0.00      chA   
ATOM    568  N   PRO c 120       5.617  29.010 105.579  1.00  0.00      chA   
ATOM    569  CD  PRO c 120       6.747  29.137 106.527  1.00  0.00      chA   
ATOM    570  HD2 PRO c 120       7.363  28.238 106.511  1.00  0.00      chA   
ATOM    571  HD3 PRO c 120       6.356  29.318 107.528  1.00  0.00      chA   
ATOM    572  CG  PRO c 120       7.595  30.316 106.175  1.00  0.00      chA   
ATOM    573  HG2 PRO c 120       8.579  29.961 105.871  1.00  0.00      chA   
ATOM    574  HG3 PRO c 120       7.678  30.933 107.069  1.00  0.00      chA   
ATOM    575  CB  PRO c 120       6.851  30.960 105.056  1.00  0.00      chA   
ATOM    576  HB2 PRO c 120       7.480  31.431 104.299  1.00  0.00      chA   
ATOM    577  HB3 PRO c 120       6.138  31.706 105.406  1.00  0.00      chA   
ATOM    578  CA  PRO c 120       6.010  29.870 104.472  1.00  0.00      chA   
ATOM    579  HA  PRO c 120       5.113  30.347 104.078  1.00  0.00      chA   
ATOM    580  C   PRO c 120       6.686  29.141 103.290  1.00  0.00      chA   
ATOM    581  O   PRO c 120       7.331  28.082 103.525  1.00  0.00      chA   
ATOM    582  N   PHE c 121       6.500  29.631 102.033  1.00  0.00      chA   
ATOM    583  H   PHE c 121       5.793  30.336 101.885  1.00  0.00      chA   
ATOM    584  CA  PHE c 121       7.278  29.237 100.873  1.00  0.00      chA   
ATOM    585  HA  PHE c 121       8.258  28.912 101.223  1.00  0.00      chA   
ATOM    586  CB  PHE c 121       6.652  27.885 100.268  1.00  0.00      chA   
ATOM    587  HB2 PHE c 121       7.402  27.550  99.552  1.00  0.00      chA   
ATOM    588  HB3 PHE c 121       6.524  27.072 100.984  1.00  0.00      chA   
ATOM    589  CG  PHE c 121       5.353  27.995  99.502  1.00  0.00      chA   
ATOM    590  CD1 PHE c 121       5.308  28.391  98.191  1.00  0.00      chA   
ATOM    591  HD1 PHE c 121       6.153  28.417  97.520  1.00  0.00      chA   
ATOM    592  CE1 PHE c 121       4.106  28.537  97.535  1.00  0.00      chA   
ATOM    593  HE1 PHE c 121       4.162  28.698  96.468  1.00  0.00      chA   
ATOM    594  CZ  PHE c 121       2.876  28.301  98.184  1.00  0.00      chA   
ATOM    595  HZ  PHE c 121       1.947  28.361  97.637  1.00  0.00      chA   
ATOM    596  CE2 PHE c 121       2.919  27.956  99.512  1.00  0.00      chA   
ATOM    597  HE2 PHE c 121       1.990  27.847 100.051  1.00  0.00      chA   
ATOM    598  CD2 PHE c 121       4.139  27.777 100.192  1.00  0.00      chA   
ATOM    599  HD2 PHE c 121       4.149  27.467 101.226  1.00  0.00      chA   
ATOM    600  C   PHE c 121       7.412  30.347  99.797  1.00  0.00      chA   
ATOM    601  O   PHE c 121       6.891  31.476  99.946  1.00  0.00      chA   
ATOM    602  N   ILE c 122       8.279  30.119  98.844  1.00  0.00      chA   
ATOM    603  H   ILE c 122       8.775  29.239  98.803  1.00  0.00      chA   
ATOM    604  CA  ILE c 122       8.591  31.137  97.790  1.00  0.00      chA   
ATOM    605  HA  ILE c 122       7.828  31.914  97.814  1.00  0.00      chA   
ATOM    606  CB  ILE c 122      10.074  31.788  97.886  1.00  0.00      chA   
ATOM    607  HB  ILE c 122      10.801  30.982  97.786  1.00  0.00      chA   
ATOM    608  CG2 ILE c 122      10.422  32.693  96.725  1.00  0.00      chA   
ATOM    609 HG21 ILE c 122      10.561  32.179  95.774  1.00  0.00      chA   
ATOM    610 HG22 ILE c 122       9.724  33.530  96.717  1.00  0.00      chA   
ATOM    611 HG23 ILE c 122      11.435  33.068  96.874  1.00  0.00      chA   
ATOM    612  CG1 ILE c 122      10.185  32.454  99.270  1.00  0.00      chA   
ATOM    613 HG12 ILE c 122       9.431  33.222  99.437  1.00  0.00      chA   
ATOM    614 HG13 ILE c 122       9.998  31.629  99.957  1.00  0.00      chA   
ATOM    615  CD1 ILE c 122      11.560  33.093  99.576  1.00  0.00      chA   
ATOM    616 HD11 ILE c 122      12.280  32.639  98.895  1.00  0.00      chA   
ATOM    617 HD12 ILE c 122      11.641  34.135  99.266  1.00  0.00      chA   
ATOM    618 HD13 ILE c 122      11.799  32.995 100.635  1.00  0.00      chA   
ATOM    619  C   ILE c 122       8.380  30.439  96.428  1.00  0.00      chA   
ATOM    620  O   ILE c 122       8.795  29.330  96.278  1.00  0.00      chA   
ATOM    621  N   SER c 123       7.918  31.225  95.438  1.00  0.00      chA   
ATOM    622  H   SER c 123       7.662  32.172  95.677  1.00  0.00      chA   
ATOM    623  CA  SER c 123       7.747  30.861  93.985  1.00  0.00      chA   
ATOM    624  HA  SER c 123       8.230  29.928  93.696  1.00  0.00      chA   
ATOM    625  CB  SER c 123       6.222  30.588  93.875  1.00  0.00      chA   
ATOM    626  HB2 SER c 123       5.696  31.280  94.534  1.00  0.00      chA   
ATOM    627  HB3 SER c 123       5.883  30.542  92.840  1.00  0.00      chA   
ATOM    628  OG  SER c 123       5.884  29.301  94.372  1.00  0.00      chA   
ATOM    629  HG  SER c 123       5.309  28.861  93.740  1.00  0.00      chA   
ATOM    630  C   SER c 123       8.221  31.913  93.016  1.00  0.00      chA   
ATOM    631  O   SER c 123       8.238  33.052  93.467  1.00  0.00      chA   
ATOM    632  N   CYX c 124       8.449  31.718  91.770  1.00  0.00      chA   
ATOM    633  H   CYX c 124       8.452  30.761  91.446  1.00  0.00      chA   
ATOM    634  CA  CYX c 124       8.627  32.773  90.728  1.00  0.00      chA   
ATOM    635  HA  CYX c 124       8.589  33.765  91.177  1.00  0.00      chA   
ATOM    636  CB  CYX c 124      10.125  32.673  90.288  1.00  0.00      chA   
ATOM    637  HB2 CYX c 124      10.255  31.770  89.690  1.00  0.00      chA   
ATOM    638  HB3 CYX c 124      10.314  33.515  89.622  1.00  0.00      chA   
ATOM    639  SG  CYX c 124      11.396  32.857  91.587  1.00  0.00      chA   
ATOM    640  C   CYX c 124       7.684  32.815  89.562  1.00  0.00      chA   
ATOM    641  O   CYX c 124       6.745  32.002  89.389  1.00  0.00      chA   
ATOM    642  N   SER c 125       7.993  33.766  88.708  1.00  0.00      chA   
ATOM    643  H   SER c 125       8.777  34.390  88.833  1.00  0.00      chA   
ATOM    644  CA  SER c 125       7.320  34.017  87.423  1.00  0.00      chA   
ATOM    645  HA  SER c 125       6.792  33.139  87.050  1.00  0.00      chA   
ATOM    646  CB  SER c 125       6.393  35.271  87.540  1.00  0.00      chA   
ATOM    647  HB2 SER c 125       5.755  35.305  86.657  1.00  0.00      chA   
ATOM    648  HB3 SER c 125       5.747  35.122  88.407  1.00  0.00      chA   
ATOM    649  OG  SER c 125       7.196  36.399  87.735  1.00  0.00      chA   
ATOM    650  HG  SER c 125       7.621  36.250  88.583  1.00  0.00      chA   
ATOM    651  C   SER c 125       8.415  34.373  86.370  1.00  0.00      chA   
ATOM    652  O   SER c 125       9.624  34.352  86.594  1.00  0.00      chA   
ATOM    653  N   HID c 126       7.901  34.765  85.193  1.00  0.00      chA   
ATOM    654  H   HID c 126       6.919  34.660  84.980  1.00  0.00      chA   
ATOM    655  CA  HID c 126       8.690  35.320  84.088  1.00  0.00      chA   
ATOM    656  HA  HID c 126       9.501  34.598  83.997  1.00  0.00      chA   
ATOM    657  CB  HID c 126       7.866  35.234  82.831  1.00  0.00      chA   
ATOM    658  HB2 HID c 126       8.497  35.376  81.953  1.00  0.00      chA   
ATOM    659  HB3 HID c 126       7.254  34.341  82.704  1.00  0.00      chA   
ATOM    660  CG  HID c 126       6.902  36.426  82.733  1.00  0.00      chA   
ATOM    661  ND1 HID c 126       5.592  36.248  82.977  1.00  0.00      chA   
ATOM    662  HD1 HID c 126       5.108  35.468  83.398  1.00  0.00      chA   
ATOM    663  CE1 HID c 126       4.880  37.305  82.499  1.00  0.00      chA   
ATOM    664  HE1 HID c 126       3.801  37.339  82.486  1.00  0.00      chA   
ATOM    665  NE2 HID c 126       5.724  38.187  81.970  1.00  0.00      chA   
ATOM    666  CD2 HID c 126       7.041  37.615  82.096  1.00  0.00      chA   
ATOM    667  HD2 HID c 126       7.992  37.974  81.732  1.00  0.00      chA   
ATOM    668  C   HID c 126       9.426  36.656  84.338  1.00  0.00      chA   
ATOM    669  O   HID c 126      10.254  37.013  83.471  1.00  0.00      chA   
ATOM    670  N   LEU c 127       9.071  37.490  85.327  1.00  0.00      chA   
ATOM    671  H   LEU c 127       8.334  37.223  85.965  1.00  0.00      chA   
ATOM    672  CA  LEU c 127       9.684  38.806  85.713  1.00  0.00      chA   
ATOM    673  HA  LEU c 127      10.634  38.786  85.181  1.00  0.00      chA   
ATOM    674  CB  LEU c 127       8.941  39.962  84.957  1.00  0.00      chA   
ATOM    675  HB2 LEU c 127       9.671  40.767  84.882  1.00  0.00      chA   
ATOM    676  HB3 LEU c 127       8.521  39.647  84.002  1.00  0.00      chA   
ATOM    677  CG  LEU c 127       7.605  40.545  85.479  1.00  0.00      chA   
ATOM    678  HG  LEU c 127       7.704  40.843  86.522  1.00  0.00      chA   
ATOM    679  CD1 LEU c 127       7.166  41.761  84.702  1.00  0.00      chA   
ATOM    680 HD11 LEU c 127       7.920  42.536  84.565  1.00  0.00      chA   
ATOM    681 HD12 LEU c 127       6.889  41.296  83.756  1.00  0.00      chA   
ATOM    682 HD13 LEU c 127       6.279  42.216  85.142  1.00  0.00      chA   
ATOM    683  CD2 LEU c 127       6.547  39.484  85.462  1.00  0.00      chA   
ATOM    684 HD21 LEU c 127       6.686  38.778  86.280  1.00  0.00      chA   
ATOM    685 HD22 LEU c 127       5.577  39.929  85.681  1.00  0.00      chA   
ATOM    686 HD23 LEU c 127       6.395  38.938  84.531  1.00  0.00      chA   
ATOM    687  C   LEU c 127       9.941  39.064  87.204  1.00  0.00      chA   
ATOM    688  O   LEU c 127      10.649  40.007  87.487  1.00  0.00      chA   
ATOM    689  N   GLU c 128       9.351  38.308  88.096  1.00  0.00      chA   
ATOM    690  H   GLU c 128       8.723  37.542  87.898  1.00  0.00      chA   
ATOM    691  CA  GLU c 128       9.514  38.478  89.525  1.00  0.00      chA   
ATOM    692  HA  GLU c 128      10.572  38.711  89.637  1.00  0.00      chA   
ATOM    693  CB  GLU c 128       8.627  39.636  89.956  1.00  0.00      chA   
ATOM    694  HB2 GLU c 128       8.880  39.961  90.966  1.00  0.00      chA   
ATOM    695  HB3 GLU c 128       8.875  40.434  89.257  1.00  0.00      chA   
ATOM    696  CG  GLU c 128       7.065  39.281  89.866  1.00  0.00      chA   
ATOM    697  HG2 GLU c 128       6.911  38.780  88.910  1.00  0.00      chA   
ATOM    698  HG3 GLU c 128       6.760  38.650  90.702  1.00  0.00      chA   
ATOM    699  CD  GLU c 128       6.317  40.550  89.981  1.00  0.00      chA   
ATOM    700  OE1 GLU c 128       6.511  41.258  91.058  1.00  0.00      chA   
ATOM    701  OE2 GLU c 128       5.740  41.021  89.016  1.00  0.00      chA   
ATOM    702  C   GLU c 128       9.292  37.183  90.285  1.00  0.00      chA   
ATOM    703  O   GLU c 128       8.658  36.307  89.763  1.00  0.00      chA   
ATOM    704  N   CYX c 129       9.716  37.194  91.591  1.00  0.00      chA   
ATOM    705  H   CYX c 129      10.200  37.986  91.989  1.00  0.00      chA   
ATOM    706  CA  CYX c 129       9.346  36.217  92.597  1.00  0.00      chA   
ATOM    707  HA  CYX c 129       8.657  35.491  92.162  1.00  0.00      chA   
ATOM    708  CB  CYX c 129      10.582  35.530  93.082  1.00  0.00      chA   
ATOM    709  HB2 CYX c 129      11.054  36.335  93.646  1.00  0.00      chA   
ATOM    710  HB3 CYX c 129      10.274  34.675  93.684  1.00  0.00      chA   
ATOM    711  SG  CYX c 129      11.647  34.809  91.781  1.00  0.00      chA   
ATOM    712  C   CYX c 129       8.580  36.756  93.803  1.00  0.00      chA   
ATOM    713  O   CYX c 129       8.412  37.935  94.191  1.00  0.00      chA   
ATOM    714  N   ARG c 130       7.810  35.867  94.427  1.00  0.00      chA   
ATOM    715  H   ARG c 130       7.800  34.907  94.112  1.00  0.00      chA   
ATOM    716  CA  ARG c 130       6.881  36.167  95.588  1.00  0.00      chA   
ATOM    717  HA  ARG c 130       7.133  37.138  96.018  1.00  0.00      chA   
ATOM    718  CB  ARG c 130       5.479  36.239  94.970  1.00  0.00      chA   
ATOM    719  HB2 ARG c 130       5.350  35.448  94.230  1.00  0.00      chA   
ATOM    720  HB3 ARG c 130       4.729  36.172  95.758  1.00  0.00      chA   
ATOM    721  CG  ARG c 130       5.268  37.598  94.229  1.00  0.00      chA   
ATOM    722  HG2 ARG c 130       5.620  38.467  94.784  1.00  0.00      chA   
ATOM    723  HG3 ARG c 130       5.829  37.659  93.296  1.00  0.00      chA   
ATOM    724  CD  ARG c 130       3.788  37.711  93.917  1.00  0.00      chA   
ATOM    725  HD2 ARG c 130       3.609  38.544  93.238  1.00  0.00      chA   
ATOM    726  HD3 ARG c 130       3.437  36.796  93.438  1.00  0.00      chA   
ATOM    727  NE  ARG c 130       2.958  38.003  95.113  1.00  0.00      chA   
ATOM    728  HE  ARG c 130       2.492  37.223  95.553  1.00  0.00      chA   
ATOM    729  CZ  ARG c 130       2.627  39.228  95.530  1.00  0.00      chA   
ATOM    730  NH1 ARG c 130       1.851  39.447  96.559  1.00  0.00      chA   
ATOM    731 HH11 ARG c 130       1.503  38.704  97.149  1.00  0.00      chA   
ATOM    732 HH12 ARG c 130       1.696  40.436  96.695  1.00  0.00      chA   
ATOM    733  NH2 ARG c 130       3.039  40.319  94.973  1.00  0.00      chA   
ATOM    734 HH21 ARG c 130       3.858  40.359  94.384  1.00  0.00      chA   
ATOM    735 HH22 ARG c 130       2.883  41.262  95.297  1.00  0.00      chA   
ATOM    736  C   ARG c 130       6.908  35.102  96.664  1.00  0.00      chA   
ATOM    737  O   ARG c 130       6.761  33.925  96.297  1.00  0.00      chA   
ATOM    738  N   THR c 131       6.998  35.554  97.880  1.00  0.00      chA   
ATOM    739  H   THR c 131       6.940  36.556  97.992  1.00  0.00      chA   
ATOM    740  CA  THR c 131       6.941  34.779  99.088  1.00  0.00      chA   
ATOM    741  HA  THR c 131       7.499  33.871  98.860  1.00  0.00      chA   
ATOM    742  CB  THR c 131       7.618  35.381 100.290  1.00  0.00      chA   
ATOM    743  HB  THR c 131       7.110  36.312 100.539  1.00  0.00      chA   
ATOM    744  CG2 THR c 131       7.719  34.534 101.539  1.00  0.00      chA   
ATOM    745 HG21 THR c 131       8.630  34.790 102.080  1.00  0.00      chA   
ATOM    746 HG22 THR c 131       6.871  34.702 102.202  1.00  0.00      chA   
ATOM    747 HG23 THR c 131       7.735  33.514 101.155  1.00  0.00      chA   
ATOM    748  OG1 THR c 131       8.954  35.724  99.994  1.00  0.00      chA   
ATOM    749  HG1 THR c 131       9.383  36.200 100.708  1.00  0.00      chA   
ATOM    750  C   THR c 131       5.468  34.560  99.438  1.00  0.00      chA   
ATOM    751  O   THR c 131       4.564  35.313  99.034  1.00  0.00      chA   
ATOM    752  N   PHE c 132       5.161  33.482 100.150  1.00  0.00      chA   
ATOM    753  H   PHE c 132       5.922  32.943 100.536  1.00  0.00      chA   
ATOM    754  CA  PHE c 132       3.835  32.946 100.455  1.00  0.00      chA   
ATOM    755  HA  PHE c 132       3.043  33.693 100.412  1.00  0.00      chA   
ATOM    756  CB  PHE c 132       3.512  31.868  99.385  1.00  0.00      chA   
ATOM    757  HB2 PHE c 132       4.392  31.228  99.312  1.00  0.00      chA   
ATOM    758  HB3 PHE c 132       2.702  31.220  99.718  1.00  0.00      chA   
ATOM    759  CG  PHE c 132       3.068  32.318  97.996  1.00  0.00      chA   
ATOM    760  CD1 PHE c 132       4.056  32.630  97.079  1.00  0.00      chA   
ATOM    761  HD1 PHE c 132       5.110  32.638  97.321  1.00  0.00      chA   
ATOM    762  CE1 PHE c 132       3.655  33.008  95.802  1.00  0.00      chA   
ATOM    763  HE1 PHE c 132       4.430  33.367  95.141  1.00  0.00      chA   
ATOM    764  CZ  PHE c 132       2.365  33.105  95.461  1.00  0.00      chA   
ATOM    765  HZ  PHE c 132       2.048  33.429  94.480  1.00  0.00      chA   
ATOM    766  CE2 PHE c 132       1.366  32.749  96.306  1.00  0.00      chA   
ATOM    767  HE2 PHE c 132       0.309  32.856  96.108  1.00  0.00      chA   
ATOM    768  CD2 PHE c 132       1.684  32.419  97.611  1.00  0.00      chA   
ATOM    769  HD2 PHE c 132       0.867  32.157  98.267  1.00  0.00      chA   
ATOM    770  C   PHE c 132       3.801  32.399 101.905  1.00  0.00      chA   
ATOM    771  O   PHE c 132       4.893  31.964 102.382  1.00  0.00      chA   
ATOM    772  N   PHE c 133       2.592  32.522 102.486  1.00  0.00      chA   
ATOM    773  H   PHE c 133       1.843  32.834 101.884  1.00  0.00      chA   
ATOM    774  CA  PHE c 133       2.328  31.972 103.861  1.00  0.00      chA   
ATOM    775  HA  PHE c 133       3.037  31.170 104.063  1.00  0.00      chA   
ATOM    776  CB  PHE c 133       2.846  33.117 104.799  1.00  0.00      chA   
ATOM    777  HB2 PHE c 133       2.698  32.723 105.803  1.00  0.00      chA   
ATOM    778  HB3 PHE c 133       3.923  33.162 104.641  1.00  0.00      chA   
ATOM    779  CG  PHE c 133       2.300  34.598 104.760  1.00  0.00      chA   
ATOM    780  CD1 PHE c 133       1.048  34.953 105.365  1.00  0.00      chA   
ATOM    781  HD1 PHE c 133       0.450  34.262 105.940  1.00  0.00      chA   
ATOM    782  CE1 PHE c 133       0.523  36.236 105.174  1.00  0.00      chA   
ATOM    783  HE1 PHE c 133      -0.441  36.495 105.589  1.00  0.00      chA   
ATOM    784  CZ  PHE c 133       1.348  37.213 104.528  1.00  0.00      chA   
ATOM    785  HZ  PHE c 133       0.981  38.228 104.521  1.00  0.00      chA   
ATOM    786  CE2 PHE c 133       2.499  36.844 103.822  1.00  0.00      chA   
ATOM    787  HE2 PHE c 133       3.141  37.498 103.249  1.00  0.00      chA   
ATOM    788  CD2 PHE c 133       2.916  35.524 103.969  1.00  0.00      chA   
ATOM    789  HD2 PHE c 133       3.829  35.307 103.437  1.00  0.00      chA   
ATOM    790  C   PHE c 133       0.946  31.588 104.124  1.00  0.00      chA   
ATOM    791  O   PHE c 133       0.069  32.317 103.640  1.00  0.00      chA   
ATOM    792  N   LEU c 134       0.691  30.727 105.135  1.00  0.00      chA   
ATOM    793  H   LEU c 134       1.497  30.243 105.506  1.00  0.00      chA   
ATOM    794  CA  LEU c 134      -0.664  30.457 105.740  1.00  0.00      chA   
ATOM    795  HA  LEU c 134      -1.408  30.787 105.016  1.00  0.00      chA   
ATOM    796  CB  LEU c 134      -0.755  28.960 105.966  1.00  0.00      chA   
ATOM    797  HB2 LEU c 134       0.015  28.628 106.664  1.00  0.00      chA   
ATOM    798  HB3 LEU c 134      -1.658  28.728 106.533  1.00  0.00      chA   
ATOM    799  CG  LEU c 134      -0.712  28.006 104.772  1.00  0.00      chA   
ATOM    800  HG  LEU c 134       0.299  27.788 104.425  1.00  0.00      chA   
ATOM    801  CD1 LEU c 134      -1.153  26.639 105.312  1.00  0.00      chA   
ATOM    802 HD11 LEU c 134      -2.224  26.527 105.474  1.00  0.00      chA   
ATOM    803 HD12 LEU c 134      -0.906  25.862 104.589  1.00  0.00      chA   
ATOM    804 HD13 LEU c 134      -0.691  26.406 106.272  1.00  0.00      chA   
ATOM    805  CD2 LEU c 134      -1.530  28.424 103.568  1.00  0.00      chA   
ATOM    806 HD21 LEU c 134      -2.565  28.354 103.899  1.00  0.00      chA   
ATOM    807 HD22 LEU c 134      -1.135  29.342 103.129  1.00  0.00      chA   
ATOM    808 HD23 LEU c 134      -1.373  27.820 102.675  1.00  0.00      chA   
ATOM    809  C   LEU c 134      -0.760  31.190 107.081  1.00  0.00      chA   
ATOM    810  O   LEU c 134      -0.084  30.952 108.095  1.00  0.00      chA   
ATOM    811  N   THR c 135      -1.608  32.219 107.016  1.00  0.00      chA   
ATOM    812  H   THR c 135      -2.050  32.376 106.121  1.00  0.00      chA   
ATOM    813  CA  THR c 135      -2.192  32.921 108.165  1.00  0.00      chA   
ATOM    814  HA  THR c 135      -1.401  33.477 108.668  1.00  0.00      chA   
ATOM    815  CB  THR c 135      -3.279  33.945 107.786  1.00  0.00      chA   
ATOM    816  HB  THR c 135      -3.271  34.685 108.587  1.00  0.00      chA   
ATOM    817  CG2 THR c 135      -2.791  34.702 106.518  1.00  0.00      chA   
ATOM    818 HG21 THR c 135      -1.702  34.749 106.533  1.00  0.00      chA   
ATOM    819 HG22 THR c 135      -3.186  34.067 105.724  1.00  0.00      chA   
ATOM    820 HG23 THR c 135      -3.351  35.636 106.538  1.00  0.00      chA   
ATOM    821  OG1 THR c 135      -4.644  33.602 107.635  1.00  0.00      chA   
ATOM    822  HG1 THR c 135      -4.950  33.801 106.747  1.00  0.00      chA   
ATOM    823  C   THR c 135      -2.810  31.945 109.206  1.00  0.00      chA   
ATOM    824  O   THR c 135      -3.007  30.694 108.994  1.00  0.00      chA   
ATOM    825  N   GLN c 136      -3.257  32.556 110.300  1.00  0.00      chA   
ATOM    826  H   GLN c 136      -2.985  33.513 110.472  1.00  0.00      chA   
ATOM    827  CA  GLN c 136      -4.130  32.074 111.341  1.00  0.00      chA   
ATOM    828  HA  GLN c 136      -4.742  31.221 111.046  1.00  0.00      chA   
ATOM    829  CB  GLN c 136      -3.275  31.845 112.680  1.00  0.00      chA   
ATOM    830  HB2 GLN c 136      -2.928  32.773 113.137  1.00  0.00      chA   
ATOM    831  HB3 GLN c 136      -3.997  31.508 113.424  1.00  0.00      chA   
ATOM    832  CG  GLN c 136      -2.147  30.813 112.853  1.00  0.00      chA   
ATOM    833  HG2 GLN c 136      -1.392  30.959 112.082  1.00  0.00      chA   
ATOM    834  HG3 GLN c 136      -1.735  30.929 113.855  1.00  0.00      chA   
ATOM    835  CD  GLN c 136      -2.676  29.386 112.646  1.00  0.00      chA   
ATOM    836  OE1 GLN c 136      -3.849  29.068 112.817  1.00  0.00      chA   
ATOM    837  NE2 GLN c 136      -1.867  28.432 112.290  1.00  0.00      chA   
ATOM    838 HE21 GLN c 136      -2.152  27.494 112.043  1.00  0.00      chA   
ATOM    839 HE22 GLN c 136      -0.860  28.472 112.373  1.00  0.00      chA   
ATOM    840  C   GLN c 136      -5.189  33.093 111.607  1.00  0.00      chA   
ATOM    841  O   GLN c 136      -5.525  33.362 112.770  1.00  0.00      chA   
ATOM    842  N   GLY c 137      -5.623  33.824 110.598  1.00  0.00      chA   
ATOM    843  H   GLY c 137      -5.461  33.433 109.680  1.00  0.00      chA   
ATOM    844  CA  GLY c 137      -6.372  35.088 110.752  1.00  0.00      chA   
ATOM    845  HA2 GLY c 137      -6.239  35.569 109.783  1.00  0.00      chA   
ATOM    846  HA3 GLY c 137      -7.446  34.921 110.675  1.00  0.00      chA   
ATOM    847  C   GLY c 137      -6.090  36.069 111.893  1.00  0.00      chA   
ATOM    848  O   GLY c 137      -7.092  36.423 112.381  1.00  0.00      chA   
ATOM    849  N   ALA c 138      -4.870  36.268 112.366  1.00  0.00      chA   
ATOM    850  H   ALA c 138      -4.095  35.927 111.816  1.00  0.00      chA   
ATOM    851  CA  ALA c 138      -4.541  37.085 113.570  1.00  0.00      chA   
ATOM    852  HA  ALA c 138      -5.366  37.769 113.772  1.00  0.00      chA   
ATOM    853  CB  ALA c 138      -4.432  36.240 114.860  1.00  0.00      chA   
ATOM    854  HB1 ALA c 138      -3.538  35.624 114.766  1.00  0.00      chA   
ATOM    855  HB2 ALA c 138      -4.146  36.812 115.742  1.00  0.00      chA   
ATOM    856  HB3 ALA c 138      -5.316  35.645 115.089  1.00  0.00      chA   
ATOM    857  C   ALA c 138      -3.239  37.936 113.342  1.00  0.00      chA   
ATOM    858  O   ALA c 138      -2.479  37.477 112.513  1.00  0.00      chA   
ATOM    859  N   LEU c 139      -2.944  38.915 114.275  1.00  0.00      chA   
ATOM    860  H   LEU c 139      -3.609  38.994 115.030  1.00  0.00      chA   
ATOM    861  CA  LEU c 139      -1.610  39.599 114.365  1.00  0.00      chA   
ATOM    862  HA  LEU c 139      -1.014  39.241 113.526  1.00  0.00      chA   
ATOM    863  CB  LEU c 139      -1.770  41.098 114.433  1.00  0.00      chA   
ATOM    864  HB2 LEU c 139      -2.285  41.277 115.377  1.00  0.00      chA   
ATOM    865  HB3 LEU c 139      -0.800  41.565 114.598  1.00  0.00      chA   
ATOM    866  CG  LEU c 139      -2.483  41.773 113.200  1.00  0.00      chA   
ATOM    867  HG  LEU c 139      -3.355  41.203 112.882  1.00  0.00      chA   
ATOM    868  CD1 LEU c 139      -3.007  43.168 113.684  1.00  0.00      chA   
ATOM    869 HD11 LEU c 139      -2.202  43.835 113.992  1.00  0.00      chA   
ATOM    870 HD12 LEU c 139      -3.631  43.551 112.877  1.00  0.00      chA   
ATOM    871 HD13 LEU c 139      -3.654  42.962 114.538  1.00  0.00      chA   
ATOM    872  CD2 LEU c 139      -1.631  42.011 111.954  1.00  0.00      chA   
ATOM    873 HD21 LEU c 139      -0.843  42.676 112.307  1.00  0.00      chA   
ATOM    874 HD22 LEU c 139      -1.471  40.972 111.664  1.00  0.00      chA   
ATOM    875 HD23 LEU c 139      -2.197  42.616 111.246  1.00  0.00      chA   
ATOM    876  C   LEU c 139      -0.882  39.123 115.651  1.00  0.00      chA   
ATOM    877  O   LEU c 139      -1.525  38.554 116.537  1.00  0.00      chA   
ATOM    878  N   LEU c 140       0.454  39.227 115.659  1.00  0.00      chA   
ATOM    879  H   LEU c 140       0.881  39.775 114.926  1.00  0.00      chA   
ATOM    880  CA  LEU c 140       1.343  38.666 116.674  1.00  0.00      chA   
ATOM    881  HA  LEU c 140       1.184  37.590 116.738  1.00  0.00      chA   
ATOM    882  CB  LEU c 140       2.816  38.938 116.302  1.00  0.00      chA   
ATOM    883  HB2 LEU c 140       2.810  38.866 115.214  1.00  0.00      chA   
ATOM    884  HB3 LEU c 140       3.120  39.962 116.518  1.00  0.00      chA   
ATOM    885  CG  LEU c 140       3.812  37.843 116.788  1.00  0.00      chA   
ATOM    886  HG  LEU c 140       3.784  37.684 117.866  1.00  0.00      chA   
ATOM    887  CD1 LEU c 140       3.624  36.455 116.123  1.00  0.00      chA   
ATOM    888 HD11 LEU c 140       4.220  35.680 116.603  1.00  0.00      chA   
ATOM    889 HD12 LEU c 140       2.605  36.075 116.036  1.00  0.00      chA   
ATOM    890 HD13 LEU c 140       4.009  36.509 115.105  1.00  0.00      chA   
ATOM    891  CD2 LEU c 140       5.271  38.380 116.588  1.00  0.00      chA   
ATOM    892 HD21 LEU c 140       5.937  37.735 117.161  1.00  0.00      chA   
ATOM    893 HD22 LEU c 140       5.400  38.389 115.506  1.00  0.00      chA   
ATOM    894 HD23 LEU c 140       5.228  39.331 117.119  1.00  0.00      chA   
ATOM    895  C   LEU c 140       1.001  39.207 118.126  1.00  0.00      chA   
ATOM    896  O   LEU c 140       0.968  40.362 118.433  1.00  0.00      chA   
ATOM    897  N   ASN c 141       0.826  38.205 118.984  1.00  0.00      chA   
ATOM    898  H   ASN c 141       0.926  37.274 118.603  1.00  0.00      chA   
ATOM    899  CA  ASN c 141       0.752  38.336 120.408  1.00  0.00      chA   
ATOM    900  HA  ASN c 141       0.710  37.323 120.810  1.00  0.00      chA   
ATOM    901  CB  ASN c 141       2.029  39.048 120.878  1.00  0.00      chA   
ATOM    902  HB2 ASN c 141       2.976  38.735 120.441  1.00  0.00      chA   
ATOM    903  HB3 ASN c 141       2.029  40.074 120.512  1.00  0.00      chA   
ATOM    904  CG  ASN c 141       2.271  39.037 122.353  1.00  0.00      chA   
ATOM    905  OD1 ASN c 141       2.758  38.057 122.845  1.00  0.00      chA   
ATOM    906  ND2 ASN c 141       2.016  40.138 123.049  1.00  0.00      chA   
ATOM    907 HD21 ASN c 141       2.107  40.206 124.053  1.00  0.00      chA   
ATOM    908 HD22 ASN c 141       1.733  40.979 122.569  1.00  0.00      chA   
ATOM    909  C   ASN c 141      -0.542  38.870 120.909  1.00  0.00      chA   
ATOM    910  O   ASN c 141      -0.773  38.942 122.105  1.00  0.00      chA   
ATOM    911  N   ASP c 142      -1.496  39.195 119.983  1.00  0.00      chA   
ATOM    912  H   ASP c 142      -1.242  38.909 119.049  1.00  0.00      chA   
ATOM    913  CA  ASP c 142      -2.879  39.310 120.263  1.00  0.00      chA   
ATOM    914  HA  ASP c 142      -2.964  40.112 120.995  1.00  0.00      chA   
ATOM    915  CB  ASP c 142      -3.627  39.765 118.998  1.00  0.00      chA   
ATOM    916  HB2 ASP c 142      -3.107  40.594 118.517  1.00  0.00      chA   
ATOM    917  HB3 ASP c 142      -3.665  38.987 118.234  1.00  0.00      chA   
ATOM    918  CG  ASP c 142      -5.135  40.055 119.315  1.00  0.00      chA   
ATOM    919  OD1 ASP c 142      -5.404  41.079 119.941  1.00  0.00      chA   
ATOM    920  OD2 ASP c 142      -5.986  39.298 118.886  1.00  0.00      chA   
ATOM    921  C   ASP c 142      -3.540  38.017 120.744  1.00  0.00      chA   
ATOM    922  O   ASP c 142      -3.148  36.942 120.250  1.00  0.00      chA   
ATOM    923  N   LYS c 143      -4.629  38.123 121.540  1.00  0.00      chA   
ATOM    924  H   LYS c 143      -4.933  39.019 121.892  1.00  0.00      chA   
ATOM    925  CA  LYS c 143      -5.407  37.006 121.995  1.00  0.00      chA   
ATOM    926  HA  LYS c 143      -4.775  36.462 122.697  1.00  0.00      chA   
ATOM    927  CB  LYS c 143      -6.680  37.542 122.677  1.00  0.00      chA   
ATOM    928  HB2 LYS c 143      -6.495  38.478 123.203  1.00  0.00      chA   
ATOM    929  HB3 LYS c 143      -7.340  37.848 121.865  1.00  0.00      chA   
ATOM    930  CG  LYS c 143      -7.403  36.605 123.618  1.00  0.00      chA   
ATOM    931  HG2 LYS c 143      -7.497  35.685 123.039  1.00  0.00      chA   
ATOM    932  HG3 LYS c 143      -6.753  36.429 124.476  1.00  0.00      chA   
ATOM    933  CD  LYS c 143      -8.875  36.948 124.034  1.00  0.00      chA   
ATOM    934  HD2 LYS c 143      -8.895  37.838 124.662  1.00  0.00      chA   
ATOM    935  HD3 LYS c 143      -9.406  37.205 123.116  1.00  0.00      chA   
ATOM    936  CE  LYS c 143      -9.626  35.875 124.888  1.00  0.00      chA   
ATOM    937  HE2 LYS c 143      -9.492  34.917 124.383  1.00  0.00      chA   
ATOM    938  HE3 LYS c 143      -9.274  35.858 125.919  1.00  0.00      chA   
ATOM    939  NZ  LYS c 143     -11.055  36.290 124.874  1.00  0.00      chA   
ATOM    940  HZ1 LYS c 143     -11.497  36.306 123.966  1.00  0.00      chA   
ATOM    941  HZ2 LYS c 143     -11.606  35.687 125.468  1.00  0.00      chA   
ATOM    942  HZ3 LYS c 143     -11.239  37.209 125.249  1.00  0.00      chA   
ATOM    943  C   LYS c 143      -5.741  35.952 120.929  1.00  0.00      chA   
ATOM    944  O   LYS c 143      -5.497  34.788 121.176  1.00  0.00      chA   
ATOM    945  N   HID c 144      -6.319  36.353 119.834  1.00  0.00      chA   
ATOM    946  H   HID c 144      -6.405  37.355 119.735  1.00  0.00      chA   
ATOM    947  CA  HID c 144      -6.754  35.520 118.711  1.00  0.00      chA   
ATOM    948  HA  HID c 144      -7.559  34.911 119.122  1.00  0.00      chA   
ATOM    949  CB  HID c 144      -7.439  36.480 117.706  1.00  0.00      chA   
ATOM    950  HB2 HID c 144      -6.818  37.293 117.329  1.00  0.00      chA   
ATOM    951  HB3 HID c 144      -7.725  35.983 116.779  1.00  0.00      chA   
ATOM    952  CG  HID c 144      -8.609  37.250 118.352  1.00  0.00      chA   
ATOM    953  ND1 HID c 144      -8.597  38.417 119.024  1.00  0.00      chA   
ATOM    954  HD1 HID c 144      -7.755  38.928 119.250  1.00  0.00      chA   
ATOM    955  CE1 HID c 144      -9.769  38.727 119.528  1.00  0.00      chA   
ATOM    956  HE1 HID c 144      -9.991  39.640 120.060  1.00  0.00      chA   
ATOM    957  NE2 HID c 144     -10.607  37.757 119.074  1.00  0.00      chA   
ATOM    958  CD2 HID c 144      -9.895  36.892 118.277  1.00  0.00      chA   
ATOM    959  HD2 HID c 144     -10.207  35.988 117.775  1.00  0.00      chA   
ATOM    960  C   HID c 144      -5.623  34.623 118.188  1.00  0.00      chA   
ATOM    961  O   HID c 144      -5.941  33.661 117.511  1.00  0.00      chA   
ATOM    962  N   SER c 145      -4.337  34.972 118.362  1.00  0.00      chA   
ATOM    963  H   SER c 145      -4.084  35.877 118.731  1.00  0.00      chA   
ATOM    964  CA  SER c 145      -3.194  34.069 117.964  1.00  0.00      chA   
ATOM    965  HA  SER c 145      -3.261  33.878 116.893  1.00  0.00      chA   
ATOM    966  CB  SER c 145      -1.810  34.888 118.038  1.00  0.00      chA   
ATOM    967  HB2 SER c 145      -1.018  34.283 117.599  1.00  0.00      chA   
ATOM    968  HB3 SER c 145      -1.771  35.786 117.421  1.00  0.00      chA   
ATOM    969  OG  SER c 145      -1.463  35.220 119.326  1.00  0.00      chA   
ATOM    970  HG  SER c 145      -2.076  35.882 119.649  1.00  0.00      chA   
ATOM    971  C   SER c 145      -3.139  32.755 118.699  1.00  0.00      chA   
ATOM    972  O   SER c 145      -2.368  31.910 118.258  1.00  0.00      chA   
ATOM    973  N   ASN c 146      -3.777  32.562 119.883  1.00  0.00      chA   
ATOM    974  H   ASN c 146      -4.391  33.302 120.193  1.00  0.00      chA   
ATOM    975  CA  ASN c 146      -3.710  31.385 120.771  1.00  0.00      chA   
ATOM    976  HA  ASN c 146      -2.632  31.245 120.858  1.00  0.00      chA   
ATOM    977  CB  ASN c 146      -4.227  31.719 122.178  1.00  0.00      chA   
ATOM    978  HB2 ASN c 146      -3.621  32.535 122.570  1.00  0.00      chA   
ATOM    979  HB3 ASN c 146      -5.272  32.029 122.162  1.00  0.00      chA   
ATOM    980  CG  ASN c 146      -4.162  30.529 123.130  1.00  0.00      chA   
ATOM    981  OD1 ASN c 146      -3.195  29.778 123.089  1.00  0.00      chA   
ATOM    982  ND2 ASN c 146      -5.232  30.247 123.776  1.00  0.00      chA   
ATOM    983 HD21 ASN c 146      -5.080  29.517 124.458  1.00  0.00      chA   
ATOM    984 HD22 ASN c 146      -6.086  30.771 123.641  1.00  0.00      chA   
ATOM    985  C   ASN c 146      -4.292  30.116 120.248  1.00  0.00      chA   
ATOM    986  O   ASN c 146      -3.520  29.115 120.138  1.00  0.00      chA   
ATOM    987  N   GLY c 147      -5.524  30.092 119.816  1.00  0.00      chA   
ATOM    988  H   GLY c 147      -5.953  30.983 120.014  1.00  0.00      chA   
ATOM    989  CA  GLY c 147      -6.217  28.915 119.242  1.00  0.00      chA   
ATOM    990  HA2 GLY c 147      -6.594  29.233 118.269  1.00  0.00      chA   
ATOM    991  HA3 GLY c 147      -5.603  28.023 119.119  1.00  0.00      chA   
ATOM    992  C   GLY c 147      -7.395  28.436 120.098  1.00  0.00      chA   
ATOM    993  O   GLY c 147      -7.185  27.632 121.025  1.00  0.00      chA   
ATOM    994  N   THR c 148      -8.665  28.697 119.740  1.00  0.00      chA   
ATOM    995  H   THR c 148      -8.804  29.343 118.977  1.00  0.00      chA   
ATOM    996  CA  THR c 148      -9.879  28.215 120.448  1.00  0.00      chA   
ATOM    997  HA  THR c 148      -9.498  27.618 121.276  1.00  0.00      chA   
ATOM    998  CB  THR c 148     -10.734  29.408 120.957  1.00  0.00      chA   
ATOM    999  HB  THR c 148     -11.632  28.976 121.398  1.00  0.00      chA   
ATOM   1000  CG2 THR c 148     -10.057  30.069 122.091  1.00  0.00      chA   
ATOM   1001 HG21 THR c 148      -9.130  30.473 121.681  1.00  0.00      chA   
ATOM   1002 HG22 THR c 148     -10.710  30.849 122.482  1.00  0.00      chA   
ATOM   1003 HG23 THR c 148      -9.984  29.371 122.925  1.00  0.00      chA   
ATOM   1004  OG1 THR c 148     -10.974  30.390 119.957  1.00  0.00      chA   
ATOM   1005  HG1 THR c 148     -10.519  31.204 120.188  1.00  0.00      chA   
ATOM   1006  C   THR c 148     -10.700  27.240 119.669  1.00  0.00      chA   
ATOM   1007  O   THR c 148     -11.709  26.618 120.107  1.00  0.00      chA   
ATOM   1008  N   VAL c 149     -10.264  27.042 118.416  1.00  0.00      chA   
ATOM   1009  H   VAL c 149      -9.345  27.337 118.115  1.00  0.00      chA   
ATOM   1010  CA  VAL c 149     -10.722  25.916 117.576  1.00  0.00      chA   
ATOM   1011  HA  VAL c 149     -11.312  25.187 118.133  1.00  0.00      chA   
ATOM   1012  CB  VAL c 149     -11.443  26.487 116.348  1.00  0.00      chA   
ATOM   1013  HB  VAL c 149     -11.705  25.608 115.758  1.00  0.00      chA   
ATOM   1014  CG1 VAL c 149     -12.695  27.185 116.696  1.00  0.00      chA   
ATOM   1015 HG11 VAL c 149     -13.266  27.471 115.813  1.00  0.00      chA   
ATOM   1016 HG12 VAL c 149     -13.314  26.440 117.194  1.00  0.00      chA   
ATOM   1017 HG13 VAL c 149     -12.549  28.005 117.399  1.00  0.00      chA   
ATOM   1018  CG2 VAL c 149     -10.616  27.342 115.346  1.00  0.00      chA   
ATOM   1019 HG21 VAL c 149      -9.645  26.936 115.057  1.00  0.00      chA   
ATOM   1020 HG22 VAL c 149     -11.102  27.314 114.372  1.00  0.00      chA   
ATOM   1021 HG23 VAL c 149     -10.476  28.340 115.761  1.00  0.00      chA   
ATOM   1022  C   VAL c 149      -9.482  25.199 116.964  1.00  0.00      chA   
ATOM   1023  O   VAL c 149      -8.408  25.822 116.986  1.00  0.00      chA   
ATOM   1024  N   LYS c 150      -9.687  24.031 116.367  1.00  0.00      chA   
ATOM   1025  H   LYS c 150     -10.656  23.821 116.178  1.00  0.00      chA   
ATOM   1026  CA  LYS c 150      -8.713  23.106 115.685  1.00  0.00      chA   
ATOM   1027  HA  LYS c 150      -8.274  22.492 116.473  1.00  0.00      chA   
ATOM   1028  CB  LYS c 150      -9.525  22.221 114.667  1.00  0.00      chA   
ATOM   1029  HB2 LYS c 150      -8.850  21.630 114.050  1.00  0.00      chA   
ATOM   1030  HB3 LYS c 150     -10.043  21.421 115.196  1.00  0.00      chA   
ATOM   1031  CG  LYS c 150     -10.483  23.045 113.742  1.00  0.00      chA   
ATOM   1032  HG2 LYS c 150     -11.271  23.520 114.326  1.00  0.00      chA   
ATOM   1033  HG3 LYS c 150      -9.990  23.925 113.328  1.00  0.00      chA   
ATOM   1034  CD  LYS c 150     -11.196  22.108 112.644  1.00  0.00      chA   
ATOM   1035  HD2 LYS c 150     -12.097  21.753 113.145  1.00  0.00      chA   
ATOM   1036  HD3 LYS c 150     -11.475  22.774 111.827  1.00  0.00      chA   
ATOM   1037  CE  LYS c 150     -10.424  20.932 112.063  1.00  0.00      chA   
ATOM   1038  HE2 LYS c 150      -9.508  21.234 111.554  1.00  0.00      chA   
ATOM   1039  HE3 LYS c 150     -10.180  20.359 112.957  1.00  0.00      chA   
ATOM   1040  NZ  LYS c 150     -11.302  20.027 111.281  1.00  0.00      chA   
ATOM   1041  HZ1 LYS c 150     -11.501  20.358 110.348  1.00  0.00      chA   
ATOM   1042  HZ2 LYS c 150     -10.747  19.197 111.132  1.00  0.00      chA   
ATOM   1043  HZ3 LYS c 150     -12.164  19.795 111.753  1.00  0.00      chA   
ATOM   1044  C   LYS c 150      -7.595  23.915 114.937  1.00  0.00      chA   
ATOM   1045  O   LYS c 150      -7.776  24.964 114.364  1.00  0.00      chA   
ATOM   1046  N   ASP c 151      -6.420  23.264 114.898  1.00  0.00      chA   
ATOM   1047  H   ASP c 151      -6.424  22.389 115.402  1.00  0.00      chA   
ATOM   1048  CA  ASP c 151      -5.236  23.540 114.018  1.00  0.00      chA   
ATOM   1049  HA  ASP c 151      -4.734  24.343 114.557  1.00  0.00      chA   
ATOM   1050  CB  ASP c 151      -4.423  22.267 113.983  1.00  0.00      chA   
ATOM   1051  HB2 ASP c 151      -4.136  21.825 114.937  1.00  0.00      chA   
ATOM   1052  HB3 ASP c 151      -5.069  21.545 113.483  1.00  0.00      chA   
ATOM   1053  CG  ASP c 151      -3.155  22.550 113.216  1.00  0.00      chA   
ATOM   1054  OD1 ASP c 151      -3.073  22.280 111.976  1.00  0.00      chA   
ATOM   1055  OD2 ASP c 151      -2.124  22.963 113.739  1.00  0.00      chA   
ATOM   1056  C   ASP c 151      -5.639  23.917 112.578  1.00  0.00      chA   
ATOM   1057  O   ASP c 151      -5.164  24.897 111.950  1.00  0.00      chA   
ATOM   1058  N   ARG c 152      -6.537  23.136 111.962  1.00  0.00      chA   
ATOM   1059  H   ARG c 152      -6.760  22.272 112.437  1.00  0.00      chA   
ATOM   1060  CA  ARG c 152      -6.856  23.206 110.571  1.00  0.00      chA   
ATOM   1061  HA  ARG c 152      -6.081  23.675 109.965  1.00  0.00      chA   
ATOM   1062  CB  ARG c 152      -7.116  21.761 109.962  1.00  0.00      chA   
ATOM   1063  HB2 ARG c 152      -7.906  21.294 110.552  1.00  0.00      chA   
ATOM   1064  HB3 ARG c 152      -7.410  21.806 108.913  1.00  0.00      chA   
ATOM   1065  CG  ARG c 152      -5.891  20.908 109.719  1.00  0.00      chA   
ATOM   1066  HG2 ARG c 152      -5.312  21.578 109.082  1.00  0.00      chA   
ATOM   1067  HG3 ARG c 152      -5.370  20.645 110.639  1.00  0.00      chA   
ATOM   1068  CD  ARG c 152      -6.184  19.580 108.974  1.00  0.00      chA   
ATOM   1069  HD2 ARG c 152      -6.966  19.787 108.244  1.00  0.00      chA   
ATOM   1070  HD3 ARG c 152      -5.237  19.291 108.519  1.00  0.00      chA   
ATOM   1071  NE  ARG c 152      -6.640  18.562 109.883  1.00  0.00      chA   
ATOM   1072  HE  ARG c 152      -7.640  18.428 109.890  1.00  0.00      chA   
ATOM   1073  CZ  ARG c 152      -5.921  17.721 110.656  1.00  0.00      chA   
ATOM   1074  NH1 ARG c 152      -6.523  16.808 111.351  1.00  0.00      chA   
ATOM   1075 HH11 ARG c 152      -7.529  16.739 111.274  1.00  0.00      chA   
ATOM   1076 HH12 ARG c 152      -5.928  16.233 111.930  1.00  0.00      chA   
ATOM   1077  NH2 ARG c 152      -4.655  17.773 110.920  1.00  0.00      chA   
ATOM   1078 HH21 ARG c 152      -4.051  18.502 110.568  1.00  0.00      chA   
ATOM   1079 HH22 ARG c 152      -4.338  17.207 111.694  1.00  0.00      chA   
ATOM   1080  C   ARG c 152      -8.035  24.185 110.374  1.00  0.00      chA   
ATOM   1081  O   ARG c 152      -9.156  23.796 110.091  1.00  0.00      chA   
ATOM   1082  N   SER c 153      -7.803  25.385 110.884  1.00  0.00      chA   
ATOM   1083  H   SER c 153      -6.839  25.550 111.139  1.00  0.00      chA   
ATOM   1084  CA  SER c 153      -8.948  26.232 111.259  1.00  0.00      chA   
ATOM   1085  HA  SER c 153      -9.660  25.558 111.735  1.00  0.00      chA   
ATOM   1086  CB  SER c 153      -8.447  27.196 112.315  1.00  0.00      chA   
ATOM   1087  HB2 SER c 153      -9.227  27.351 113.061  1.00  0.00      chA   
ATOM   1088  HB3 SER c 153      -7.465  26.882 112.669  1.00  0.00      chA   
ATOM   1089  OG  SER c 153      -8.320  28.398 111.693  1.00  0.00      chA   
ATOM   1090  HG  SER c 153      -7.668  28.860 112.226  1.00  0.00      chA   
ATOM   1091  C   SER c 153      -9.719  26.699 110.000  1.00  0.00      chA   
ATOM   1092  O   SER c 153      -9.105  26.900 108.939  1.00  0.00      chA   
ATOM   1093  N   PRO c 154     -11.015  27.123 110.063  1.00  0.00      chA   
ATOM   1094  CD  PRO c 154     -11.994  26.878 111.132  1.00  0.00      chA   
ATOM   1095  HD2 PRO c 154     -11.592  27.211 112.089  1.00  0.00      chA   
ATOM   1096  HD3 PRO c 154     -12.147  25.801 111.188  1.00  0.00      chA   
ATOM   1097  CG  PRO c 154     -13.234  27.737 110.821  1.00  0.00      chA   
ATOM   1098  HG2 PRO c 154     -13.088  28.700 111.310  1.00  0.00      chA   
ATOM   1099  HG3 PRO c 154     -14.210  27.320 111.067  1.00  0.00      chA   
ATOM   1100  CB  PRO c 154     -13.127  27.893 109.263  1.00  0.00      chA   
ATOM   1101  HB2 PRO c 154     -13.663  28.775 108.915  1.00  0.00      chA   
ATOM   1102  HB3 PRO c 154     -13.499  26.951 108.861  1.00  0.00      chA   
ATOM   1103  CA  PRO c 154     -11.618  27.955 109.022  1.00  0.00      chA   
ATOM   1104  HA  PRO c 154     -11.348  27.494 108.072  1.00  0.00      chA   
ATOM   1105  C   PRO c 154     -11.187  29.438 108.955  1.00  0.00      chA   
ATOM   1106  O   PRO c 154     -11.759  30.209 108.221  1.00  0.00      chA   
ATOM   1107  N   HID c 155     -10.125  29.819 109.757  1.00  0.00      chA   
ATOM   1108  H   HID c 155      -9.573  29.166 110.294  1.00  0.00      chA   
ATOM   1109  CA  HID c 155      -9.657  31.228 109.818  1.00  0.00      chA   
ATOM   1110  HA  HID c 155     -10.232  31.898 109.178  1.00  0.00      chA   
ATOM   1111  CB  HID c 155      -9.711  31.680 111.298  1.00  0.00      chA   
ATOM   1112  HB2 HID c 155      -8.832  31.261 111.787  1.00  0.00      chA   
ATOM   1113  HB3 HID c 155      -9.674  32.766 111.219  1.00  0.00      chA   
ATOM   1114  CG  HID c 155     -10.908  31.337 112.138  1.00  0.00      chA   
ATOM   1115  ND1 HID c 155     -10.795  31.024 113.468  1.00  0.00      chA   
ATOM   1116  HD1 HID c 155     -10.018  31.122 114.105  1.00  0.00      chA   
ATOM   1117  CE1 HID c 155     -12.015  30.517 113.887  1.00  0.00      chA   
ATOM   1118  HE1 HID c 155     -12.180  29.971 114.804  1.00  0.00      chA   
ATOM   1119  NE2 HID c 155     -12.905  30.727 112.919  1.00  0.00      chA   
ATOM   1120  CD2 HID c 155     -12.210  31.213 111.823  1.00  0.00      chA   
ATOM   1121  HD2 HID c 155     -12.686  31.309 110.858  1.00  0.00      chA   
ATOM   1122  C   HID c 155      -8.273  31.343 109.143  1.00  0.00      chA   
ATOM   1123  O   HID c 155      -7.881  32.397 108.630  1.00  0.00      chA   
ATOM   1124  N   ARG c 156      -7.578  30.254 109.062  1.00  0.00      chA   
ATOM   1125  H   ARG c 156      -7.881  29.422 109.547  1.00  0.00      chA   
ATOM   1126  CA  ARG c 156      -6.366  30.126 108.196  1.00  0.00      chA   
ATOM   1127  HA  ARG c 156      -5.594  30.831 108.507  1.00  0.00      chA   
ATOM   1128  CB  ARG c 156      -5.889  28.705 108.332  1.00  0.00      chA   
ATOM   1129  HB2 ARG c 156      -6.668  27.976 108.108  1.00  0.00      chA   
ATOM   1130  HB3 ARG c 156      -5.138  28.595 107.549  1.00  0.00      chA   
ATOM   1131  CG  ARG c 156      -5.372  28.284 109.708  1.00  0.00      chA   
ATOM   1132  HG2 ARG c 156      -5.219  29.110 110.403  1.00  0.00      chA   
ATOM   1133  HG3 ARG c 156      -6.227  27.818 110.196  1.00  0.00      chA   
ATOM   1134  CD  ARG c 156      -4.250  27.273 109.821  1.00  0.00      chA   
ATOM   1135  HD2 ARG c 156      -4.229  27.027 110.883  1.00  0.00      chA   
ATOM   1136  HD3 ARG c 156      -4.459  26.327 109.324  1.00  0.00      chA   
ATOM   1137  NE  ARG c 156      -2.982  27.799 109.354  1.00  0.00      chA   
ATOM   1138  HE  ARG c 156      -2.994  28.794 109.179  1.00  0.00      chA   
ATOM   1139  CZ  ARG c 156      -1.784  27.236 109.175  1.00  0.00      chA   
ATOM   1140  NH1 ARG c 156      -0.767  28.028 109.018  1.00  0.00      chA   
ATOM   1141 HH11 ARG c 156      -0.827  29.022 108.850  1.00  0.00      chA   
ATOM   1142 HH12 ARG c 156       0.134  27.602 108.857  1.00  0.00      chA   
ATOM   1143  NH2 ARG c 156      -1.604  25.966 109.167  1.00  0.00      chA   
ATOM   1144 HH21 ARG c 156      -2.339  25.297 109.353  1.00  0.00      chA   
ATOM   1145 HH22 ARG c 156      -0.679  25.602 108.991  1.00  0.00      chA   
ATOM   1146  C   ARG c 156      -6.666  30.366 106.640  1.00  0.00      chA   
ATOM   1147  O   ARG c 156      -7.632  29.945 106.043  1.00  0.00      chA   
ATOM   1148  N   THR c 157      -5.825  31.154 106.093  1.00  0.00      chA   
ATOM   1149  H   THR c 157      -5.130  31.577 106.693  1.00  0.00      chA   
ATOM   1150  CA  THR c 157      -5.867  31.477 104.622  1.00  0.00      chA   
ATOM   1151  HA  THR c 157      -6.397  30.699 104.075  1.00  0.00      chA   
ATOM   1152  CB  THR c 157      -6.588  32.837 104.409  1.00  0.00      chA   
ATOM   1153  HB  THR c 157      -6.529  33.080 103.347  1.00  0.00      chA   
ATOM   1154  CG2 THR c 157      -8.023  32.891 104.967  1.00  0.00      chA   
ATOM   1155 HG21 THR c 157      -8.635  32.105 104.524  1.00  0.00      chA   
ATOM   1156 HG22 THR c 157      -7.992  32.747 106.047  1.00  0.00      chA   
ATOM   1157 HG23 THR c 157      -8.471  33.885 104.934  1.00  0.00      chA   
ATOM   1158  OG1 THR c 157      -5.906  33.884 105.083  1.00  0.00      chA   
ATOM   1159  HG1 THR c 157      -6.466  34.660 105.009  1.00  0.00      chA   
ATOM   1160  C   THR c 157      -4.441  31.582 104.041  1.00  0.00      chA   
ATOM   1161  O   THR c 157      -3.485  31.809 104.785  1.00  0.00      chA   
ATOM   1162  N   LEU c 158      -4.174  31.376 102.749  1.00  0.00      chA   
ATOM   1163  H   LEU c 158      -4.972  31.078 102.207  1.00  0.00      chA   
ATOM   1164  CA  LEU c 158      -2.983  31.664 101.947  1.00  0.00      chA   
ATOM   1165  HA  LEU c 158      -2.168  31.526 102.657  1.00  0.00      chA   
ATOM   1166  CB  LEU c 158      -2.938  30.639 100.781  1.00  0.00      chA   
ATOM   1167  HB2 LEU c 158      -2.925  29.665 101.269  1.00  0.00      chA   
ATOM   1168  HB3 LEU c 158      -3.842  30.725 100.179  1.00  0.00      chA   
ATOM   1169  CG  LEU c 158      -1.711  30.727  99.864  1.00  0.00      chA   
ATOM   1170  HG  LEU c 158      -1.576  31.740  99.486  1.00  0.00      chA   
ATOM   1171  CD1 LEU c 158      -0.340  30.471 100.522  1.00  0.00      chA   
ATOM   1172 HD11 LEU c 158      -0.339  30.991 101.480  1.00  0.00      chA   
ATOM   1173 HD12 LEU c 158      -0.109  29.409 100.606  1.00  0.00      chA   
ATOM   1174 HD13 LEU c 158       0.394  30.910  99.847  1.00  0.00      chA   
ATOM   1175  CD2 LEU c 158      -1.986  29.817  98.648  1.00  0.00      chA   
ATOM   1176 HD21 LEU c 158      -2.875  30.221  98.164  1.00  0.00      chA   
ATOM   1177 HD22 LEU c 158      -1.244  29.956  97.862  1.00  0.00      chA   
ATOM   1178 HD23 LEU c 158      -2.194  28.816  99.022  1.00  0.00      chA   
ATOM   1179  C   LEU c 158      -2.982  33.080 101.504  1.00  0.00      chA   
ATOM   1180  O   LEU c 158      -3.946  33.542 100.879  1.00  0.00      chA   
ATOM   1181  N   MET c 159      -1.737  33.631 101.570  1.00  0.00      chA   
ATOM   1182  H   MET c 159      -0.984  33.181 102.070  1.00  0.00      chA   
ATOM   1183  CA  MET c 159      -1.367  34.957 101.155  1.00  0.00      chA   
ATOM   1184  HA  MET c 159      -2.105  35.322 100.441  1.00  0.00      chA   
ATOM   1185  CB  MET c 159      -1.326  35.909 102.373  1.00  0.00      chA   
ATOM   1186  HB2 MET c 159      -0.593  35.525 103.083  1.00  0.00      chA   
ATOM   1187  HB3 MET c 159      -0.977  36.893 102.061  1.00  0.00      chA   
ATOM   1188  CG  MET c 159      -2.631  36.116 103.108  1.00  0.00      chA   
ATOM   1189  HG2 MET c 159      -3.438  35.753 102.472  1.00  0.00      chA   
ATOM   1190  HG3 MET c 159      -2.615  35.525 104.024  1.00  0.00      chA   
ATOM   1191  SD  MET c 159      -2.799  37.867 103.578  1.00  0.00      chA   
ATOM   1192  CE  MET c 159      -4.488  37.808 104.038  1.00  0.00      chA   
ATOM   1193  HE1 MET c 159      -5.118  37.323 103.293  1.00  0.00      chA   
ATOM   1194  HE2 MET c 159      -4.585  37.069 104.833  1.00  0.00      chA   
ATOM   1195  HE3 MET c 159      -4.998  38.765 104.149  1.00  0.00      chA   
ATOM   1196  C   MET c 159       0.004  34.965 100.476  1.00  0.00      chA   
ATOM   1197  O   MET c 159       0.703  33.997 100.589  1.00  0.00      chA   
ATOM   1198  N   SER c 160       0.361  36.111  99.817  1.00  0.00      chA   
ATOM   1199  H   SER c 160      -0.303  36.869  99.737  1.00  0.00      chA   
ATOM   1200  CA  SER c 160       1.634  36.293  99.183  1.00  0.00      chA   
ATOM   1201  HA  SER c 160       2.374  35.656  99.667  1.00  0.00      chA   
ATOM   1202  CB  SER c 160       1.562  35.838  97.673  1.00  0.00      chA   
ATOM   1203  HB2 SER c 160       2.561  35.516  97.379  1.00  0.00      chA   
ATOM   1204  HB3 SER c 160       1.030  34.889  97.727  1.00  0.00      chA   
ATOM   1205  OG  SER c 160       0.934  36.838  96.890  1.00  0.00      chA   
ATOM   1206  HG  SER c 160       0.071  36.489  96.650  1.00  0.00      chA   
ATOM   1207  C   SER c 160       2.174  37.752  99.407  1.00  0.00      chA   
ATOM   1208  O   SER c 160       1.419  38.722  99.647  1.00  0.00      chA   
ATOM   1209  N   CYS c 161       3.457  37.921  99.187  1.00  0.00      chA   
ATOM   1210  H   CYS c 161       4.037  37.095  99.209  1.00  0.00      chA   
ATOM   1211  CA  CYS c 161       4.131  39.231  99.249  1.00  0.00      chA   
ATOM   1212  HA  CYS c 161       3.459  39.951  98.782  1.00  0.00      chA   
ATOM   1213  CB  CYS c 161       4.234  39.596 100.749  1.00  0.00      chA   
ATOM   1214  HB2 CYS c 161       4.496  40.644 100.901  1.00  0.00      chA   
ATOM   1215  HB3 CYS c 161       3.214  39.443 101.098  1.00  0.00      chA   
ATOM   1216  SG  CYS c 161       5.373  38.482 101.586  1.00  0.00      chA   
ATOM   1217  HG  CYS c 161       6.444  38.667 100.808  1.00  0.00      chA   
ATOM   1218  C   CYS c 161       5.466  39.259  98.478  1.00  0.00      chA   
ATOM   1219  O   CYS c 161       6.005  38.185  98.274  1.00  0.00      chA   
ATOM   1220  N   PRO c 162       6.126  40.417  98.303  1.00  0.00      chA   
ATOM   1221  CD  PRO c 162       5.588  41.708  98.583  1.00  0.00      chA   
ATOM   1222  HD2 PRO c 162       5.675  41.813  99.666  1.00  0.00      chA   
ATOM   1223  HD3 PRO c 162       4.591  41.846  98.164  1.00  0.00      chA   
ATOM   1224  CG  PRO c 162       6.543  42.685  97.954  1.00  0.00      chA   
ATOM   1225  HG2 PRO c 162       6.690  43.636  98.465  1.00  0.00      chA   
ATOM   1226  HG3 PRO c 162       6.156  42.760  96.938  1.00  0.00      chA   
ATOM   1227  CB  PRO c 162       7.947  42.050  97.743  1.00  0.00      chA   
ATOM   1228  HB2 PRO c 162       8.574  42.256  98.611  1.00  0.00      chA   
ATOM   1229  HB3 PRO c 162       8.352  42.407  96.797  1.00  0.00      chA   
ATOM   1230  CA  PRO c 162       7.497  40.527  97.751  1.00  0.00      chA   
ATOM   1231  HA  PRO c 162       7.339  40.139  96.746  1.00  0.00      chA   
ATOM   1232  C   PRO c 162       8.498  39.708  98.510  1.00  0.00      chA   
ATOM   1233  O   PRO c 162       8.370  39.481  99.699  1.00  0.00      chA   
ATOM   1234  N   VAL c 163       9.586  39.343  97.781  1.00  0.00      chA   
ATOM   1235  H   VAL c 163       9.869  39.789  96.922  1.00  0.00      chA   
ATOM   1236  CA  VAL c 163      10.593  38.601  98.421  1.00  0.00      chA   
ATOM   1237  HA  VAL c 163      10.075  37.701  98.756  1.00  0.00      chA   
ATOM   1238  CB  VAL c 163      11.700  38.121  97.477  1.00  0.00      chA   
ATOM   1239  HB  VAL c 163      12.105  38.888  96.817  1.00  0.00      chA   
ATOM   1240  CG1 VAL c 163      12.969  37.513  98.165  1.00  0.00      chA   
ATOM   1241 HG11 VAL c 163      13.572  37.029  97.397  1.00  0.00      chA   
ATOM   1242 HG12 VAL c 163      13.412  38.258  98.825  1.00  0.00      chA   
ATOM   1243 HG13 VAL c 163      12.630  36.662  98.757  1.00  0.00      chA   
ATOM   1244  CG2 VAL c 163      11.193  37.051  96.565  1.00  0.00      chA   
ATOM   1245 HG21 VAL c 163      10.312  37.393  96.023  1.00  0.00      chA   
ATOM   1246 HG22 VAL c 163      11.929  36.837  95.790  1.00  0.00      chA   
ATOM   1247 HG23 VAL c 163      10.979  36.160  97.155  1.00  0.00      chA   
ATOM   1248  C   VAL c 163      11.208  39.340  99.621  1.00  0.00      chA   
ATOM   1249  O   VAL c 163      11.665  40.493  99.478  1.00  0.00      chA   
ATOM   1250  N   GLY c 164      11.265  38.710 100.835  1.00  0.00      chA   
ATOM   1251  H   GLY c 164      10.908  37.768 100.908  1.00  0.00      chA   
ATOM   1252  CA  GLY c 164      11.807  39.258 102.143  1.00  0.00      chA   
ATOM   1253  HA2 GLY c 164      11.947  38.415 102.819  1.00  0.00      chA   
ATOM   1254  HA3 GLY c 164      12.740  39.791 101.958  1.00  0.00      chA   
ATOM   1255  C   GLY c 164      10.796  40.259 102.765  1.00  0.00      chA   
ATOM   1256  O   GLY c 164      11.126  40.970 103.719  1.00  0.00      chA   
ATOM   1257  N   GLU c 165       9.554  40.410 102.254  1.00  0.00      chA   
ATOM   1258  H   GLU c 165       9.301  39.788 101.500  1.00  0.00      chA   
ATOM   1259  CA  GLU c 165       8.549  41.231 102.906  1.00  0.00      chA   
ATOM   1260  HA  GLU c 165       9.054  42.188 103.040  1.00  0.00      chA   
ATOM   1261  CB  GLU c 165       7.431  41.476 101.854  1.00  0.00      chA   
ATOM   1262  HB2 GLU c 165       7.881  41.648 100.876  1.00  0.00      chA   
ATOM   1263  HB3 GLU c 165       6.953  40.511 101.692  1.00  0.00      chA   
ATOM   1264  CG  GLU c 165       6.410  42.513 102.390  1.00  0.00      chA   
ATOM   1265  HG2 GLU c 165       5.562  42.512 101.706  1.00  0.00      chA   
ATOM   1266  HG3 GLU c 165       6.086  42.238 103.394  1.00  0.00      chA   
ATOM   1267  CD  GLU c 165       7.009  43.889 102.492  1.00  0.00      chA   
ATOM   1268  OE1 GLU c 165       7.618  44.190 103.550  1.00  0.00      chA   
ATOM   1269  OE2 GLU c 165       6.907  44.554 101.468  1.00  0.00      chA   
ATOM   1270  C   GLU c 165       8.192  40.642 104.280  1.00  0.00      chA   
ATOM   1271  O   GLU c 165       7.760  39.433 104.382  1.00  0.00      chA   
ATOM   1272  N   ALA c 166       8.137  41.539 105.244  1.00  0.00      chA   
ATOM   1273  H   ALA c 166       8.152  42.518 104.994  1.00  0.00      chA   
ATOM   1274  CA  ALA c 166       7.586  41.082 106.570  1.00  0.00      chA   
ATOM   1275  HA  ALA c 166       7.986  40.086 106.758  1.00  0.00      chA   
ATOM   1276  CB  ALA c 166       7.987  42.088 107.686  1.00  0.00      chA   
ATOM   1277  HB1 ALA c 166       7.533  41.786 108.629  1.00  0.00      chA   
ATOM   1278  HB2 ALA c 166       9.051  42.036 107.909  1.00  0.00      chA   
ATOM   1279  HB3 ALA c 166       7.626  43.093 107.464  1.00  0.00      chA   
ATOM   1280  C   ALA c 166       6.036  40.940 106.495  1.00  0.00      chA   
ATOM   1281  O   ALA c 166       5.411  41.976 106.285  1.00  0.00      chA   
ATOM   1282  N   PRO c 167       5.375  39.776 106.775  1.00  0.00      chA   
ATOM   1283  CD  PRO c 167       6.043  38.481 106.826  1.00  0.00      chA   
ATOM   1284  HD2 PRO c 167       6.693  38.340 107.689  1.00  0.00      chA   
ATOM   1285  HD3 PRO c 167       6.564  38.267 105.892  1.00  0.00      chA   
ATOM   1286  CG  PRO c 167       4.991  37.396 106.872  1.00  0.00      chA   
ATOM   1287  HG2 PRO c 167       5.228  36.518 107.474  1.00  0.00      chA   
ATOM   1288  HG3 PRO c 167       4.874  37.161 105.814  1.00  0.00      chA   
ATOM   1289  CB  PRO c 167       3.672  38.145 107.228  1.00  0.00      chA   
ATOM   1290  HB2 PRO c 167       3.710  38.221 108.314  1.00  0.00      chA   
ATOM   1291  HB3 PRO c 167       2.837  37.596 106.794  1.00  0.00      chA   
ATOM   1292  CA  PRO c 167       3.916  39.576 106.592  1.00  0.00      chA   
ATOM   1293  HA  PRO c 167       3.703  39.574 105.524  1.00  0.00      chA   
ATOM   1294  C   PRO c 167       3.019  40.584 107.306  1.00  0.00      chA   
ATOM   1295  O   PRO c 167       2.809  40.406 108.511  1.00  0.00      chA   
ATOM   1296  N   SER c 168       2.333  41.524 106.573  1.00  0.00      chA   
ATOM   1297  H   SER c 168       2.573  41.632 105.599  1.00  0.00      chA   
ATOM   1298  CA  SER c 168       1.410  42.488 107.153  1.00  0.00      chA   
ATOM   1299  HA  SER c 168       0.950  42.074 108.052  1.00  0.00      chA   
ATOM   1300  CB  SER c 168       2.134  43.846 107.374  1.00  0.00      chA   
ATOM   1301  HB2 SER c 168       2.853  43.616 108.160  1.00  0.00      chA   
ATOM   1302  HB3 SER c 168       2.580  44.208 106.448  1.00  0.00      chA   
ATOM   1303  OG  SER c 168       1.167  44.804 107.868  1.00  0.00      chA   
ATOM   1304  HG  SER c 168       1.288  45.010 108.798  1.00  0.00      chA   
ATOM   1305  C   SER c 168       0.158  42.715 106.334  1.00  0.00      chA   
ATOM   1306  O   SER c 168       0.244  42.732 105.088  1.00  0.00      chA   
ATOM   1307  N   PRO c 169      -1.043  42.947 106.903  1.00  0.00      chA   
ATOM   1308  CD  PRO c 169      -1.326  43.032 108.294  1.00  0.00      chA   
ATOM   1309  HD2 PRO c 169      -0.800  43.819 108.834  1.00  0.00      chA   
ATOM   1310  HD3 PRO c 169      -1.367  42.035 108.731  1.00  0.00      chA   
ATOM   1311  CG  PRO c 169      -2.747  43.431 108.273  1.00  0.00      chA   
ATOM   1312  HG2 PRO c 169      -2.765  44.513 108.405  1.00  0.00      chA   
ATOM   1313  HG3 PRO c 169      -3.345  43.137 109.136  1.00  0.00      chA   
ATOM   1314  CB  PRO c 169      -3.476  43.233 106.936  1.00  0.00      chA   
ATOM   1315  HB2 PRO c 169      -4.163  44.021 106.630  1.00  0.00      chA   
ATOM   1316  HB3 PRO c 169      -3.880  42.221 106.907  1.00  0.00      chA   
ATOM   1317  CA  PRO c 169      -2.248  43.217 106.035  1.00  0.00      chA   
ATOM   1318  HA  PRO c 169      -2.325  42.551 105.175  1.00  0.00      chA   
ATOM   1319  C   PRO c 169      -2.163  44.597 105.302  1.00  0.00      chA   
ATOM   1320  O   PRO c 169      -3.066  45.027 104.617  1.00  0.00      chA   
ATOM   1321  N   TYR c 170      -1.064  45.312 105.506  1.00  0.00      chA   
ATOM   1322  H   TYR c 170      -0.320  44.936 106.075  1.00  0.00      chA   
ATOM   1323  CA  TYR c 170      -0.687  46.633 104.867  1.00  0.00      chA   
ATOM   1324  HA  TYR c 170      -1.597  47.091 104.477  1.00  0.00      chA   
ATOM   1325  CB  TYR c 170      -0.205  47.670 105.928  1.00  0.00      chA   
ATOM   1326  HB2 TYR c 170       0.848  47.445 106.102  1.00  0.00      chA   
ATOM   1327  HB3 TYR c 170      -0.205  48.614 105.381  1.00  0.00      chA   
ATOM   1328  CG  TYR c 170      -0.968  47.708 107.293  1.00  0.00      chA   
ATOM   1329  CD1 TYR c 170      -0.172  47.967 108.425  1.00  0.00      chA   
ATOM   1330  HD1 TYR c 170       0.866  48.226 108.285  1.00  0.00      chA   
ATOM   1331  CE1 TYR c 170      -0.663  47.963 109.759  1.00  0.00      chA   
ATOM   1332  HE1 TYR c 170      -0.055  48.286 110.592  1.00  0.00      chA   
ATOM   1333  CZ  TYR c 170      -2.071  47.638 110.008  1.00  0.00      chA   
ATOM   1334  OH  TYR c 170      -2.585  47.734 111.262  1.00  0.00      chA   
ATOM   1335  HH  TYR c 170      -1.901  47.795 111.932  1.00  0.00      chA   
ATOM   1336  CE2 TYR c 170      -2.858  47.339 108.859  1.00  0.00      chA   
ATOM   1337  HE2 TYR c 170      -3.919  47.272 109.055  1.00  0.00      chA   
ATOM   1338  CD2 TYR c 170      -2.329  47.344 107.515  1.00  0.00      chA   
ATOM   1339  HD2 TYR c 170      -2.904  47.077 106.641  1.00  0.00      chA   
ATOM   1340  C   TYR c 170       0.414  46.574 103.753  1.00  0.00      chA   
ATOM   1341  O   TYR c 170       0.836  47.540 103.303  1.00  0.00      chA   
ATOM   1342  N   ASN c 171       0.908  45.360 103.395  1.00  0.00      chA   
ATOM   1343  H   ASN c 171       0.404  44.522 103.646  1.00  0.00      chA   
ATOM   1344  CA  ASN c 171       2.060  45.094 102.457  1.00  0.00      chA   
ATOM   1345  HA  ASN c 171       1.986  45.765 101.601  1.00  0.00      chA   
ATOM   1346  CB  ASN c 171       3.342  45.366 103.284  1.00  0.00      chA   
ATOM   1347  HB2 ASN c 171       4.158  45.697 102.642  1.00  0.00      chA   
ATOM   1348  HB3 ASN c 171       3.087  46.119 104.029  1.00  0.00      chA   
ATOM   1349  CG  ASN c 171       3.836  44.179 104.154  1.00  0.00      chA   
ATOM   1350  OD1 ASN c 171       3.243  43.136 104.109  1.00  0.00      chA   
ATOM   1351  ND2 ASN c 171       4.908  44.442 104.859  1.00  0.00      chA   
ATOM   1352 HD21 ASN c 171       5.308  43.630 105.307  1.00  0.00      chA   
ATOM   1353 HD22 ASN c 171       5.319  45.364 104.888  1.00  0.00      chA   
ATOM   1354  C   ASN c 171       2.038  43.784 101.646  1.00  0.00      chA   
ATOM   1355  O   ASN c 171       3.036  43.462 100.971  1.00  0.00      chA   
ATOM   1356  N   SER c 172       0.983  42.978 101.745  1.00  0.00      chA   
ATOM   1357  H   SER c 172       0.168  43.384 102.187  1.00  0.00      chA   
ATOM   1358  CA  SER c 172       0.798  41.634 101.269  1.00  0.00      chA   
ATOM   1359  HA  SER c 172       1.508  41.429 100.468  1.00  0.00      chA   
ATOM   1360  CB  SER c 172       1.149  40.695 102.451  1.00  0.00      chA   
ATOM   1361  HB2 SER c 172       1.284  39.727 101.969  1.00  0.00      chA   
ATOM   1362  HB3 SER c 172       2.151  40.971 102.777  1.00  0.00      chA   
ATOM   1363  OG  SER c 172       0.166  40.649 103.392  1.00  0.00      chA   
ATOM   1364  HG  SER c 172       0.135  41.406 103.981  1.00  0.00      chA   
ATOM   1365  C   SER c 172      -0.533  41.541 100.534  1.00  0.00      chA   
ATOM   1366  O   SER c 172      -1.142  42.555 100.116  1.00  0.00      chA   
ATOM   1367  N   ARG c 173      -0.946  40.271 100.238  1.00  0.00      chA   
ATOM   1368  H   ARG c 173      -0.326  39.530 100.533  1.00  0.00      chA   
ATOM   1369  CA  ARG c 173      -2.090  39.966  99.356  1.00  0.00      chA   
ATOM   1370  HA  ARG c 173      -2.838  40.700  99.659  1.00  0.00      chA   
ATOM   1371  CB  ARG c 173      -1.697  40.072  97.878  1.00  0.00      chA   
ATOM   1372  HB2 ARG c 173      -1.392  41.082  97.603  1.00  0.00      chA   
ATOM   1373  HB3 ARG c 173      -0.924  39.335  97.661  1.00  0.00      chA   
ATOM   1374  CG  ARG c 173      -2.870  39.920  96.928  1.00  0.00      chA   
ATOM   1375  HG2 ARG c 173      -3.485  39.039  97.114  1.00  0.00      chA   
ATOM   1376  HG3 ARG c 173      -3.586  40.713  97.147  1.00  0.00      chA   
ATOM   1377  CD  ARG c 173      -2.526  39.832  95.466  1.00  0.00      chA   
ATOM   1378  HD2 ARG c 173      -3.487  39.876  94.954  1.00  0.00      chA   
ATOM   1379  HD3 ARG c 173      -2.005  40.758  95.223  1.00  0.00      chA   
ATOM   1380  NE  ARG c 173      -1.857  38.545  95.058  1.00  0.00      chA   
ATOM   1381  HE  ARG c 173      -1.791  37.802  95.739  1.00  0.00      chA   
ATOM   1382  CZ  ARG c 173      -0.988  38.331  94.053  1.00  0.00      chA   
ATOM   1383  NH1 ARG c 173      -0.261  37.253  93.869  1.00  0.00      chA   
ATOM   1384 HH11 ARG c 173      -0.430  36.567  94.591  1.00  0.00      chA   
ATOM   1385 HH12 ARG c 173       0.485  37.235  93.188  1.00  0.00      chA   
ATOM   1386  NH2 ARG c 173      -0.798  39.266  93.175  1.00  0.00      chA   
ATOM   1387 HH21 ARG c 173      -1.378  40.091  93.131  1.00  0.00      chA   
ATOM   1388 HH22 ARG c 173      -0.170  39.240  92.384  1.00  0.00      chA   
ATOM   1389  C   ARG c 173      -2.709  38.521  99.585  1.00  0.00      chA   
ATOM   1390  O   ARG c 173      -2.037  37.516  99.601  1.00  0.00      chA   
ATOM   1391  N   PHE c 174      -4.053  38.420  99.707  1.00  0.00      chA   
ATOM   1392  H   PHE c 174      -4.732  39.167  99.658  1.00  0.00      chA   
ATOM   1393  CA  PHE c 174      -4.722  37.085  99.974  1.00  0.00      chA   
ATOM   1394  HA  PHE c 174      -4.211  36.549 100.772  1.00  0.00      chA   
ATOM   1395  CB  PHE c 174      -6.218  37.437 100.389  1.00  0.00      chA   
ATOM   1396  HB2 PHE c 174      -6.231  37.708 101.444  1.00  0.00      chA   
ATOM   1397  HB3 PHE c 174      -6.586  38.233  99.742  1.00  0.00      chA   
ATOM   1398  CG  PHE c 174      -7.257  36.369 100.144  1.00  0.00      chA   
ATOM   1399  CD1 PHE c 174      -7.341  35.409 101.119  1.00  0.00      chA   
ATOM   1400  HD1 PHE c 174      -6.719  35.475 101.999  1.00  0.00      chA   
ATOM   1401  CE1 PHE c 174      -8.247  34.365 100.927  1.00  0.00      chA   
ATOM   1402  HE1 PHE c 174      -8.233  33.651 101.737  1.00  0.00      chA   
ATOM   1403  CZ  PHE c 174      -9.016  34.238  99.759  1.00  0.00      chA   
ATOM   1404  HZ  PHE c 174      -9.656  33.370  99.706  1.00  0.00      chA   
ATOM   1405  CE2 PHE c 174      -9.016  35.267  98.785  1.00  0.00      chA   
ATOM   1406  HE2 PHE c 174      -9.737  35.216  97.982  1.00  0.00      chA   
ATOM   1407  CD2 PHE c 174      -8.075  36.367  98.958  1.00  0.00      chA   
ATOM   1408  HD2 PHE c 174      -8.191  37.256  98.355  1.00  0.00      chA   
ATOM   1409  C   PHE c 174      -4.774  36.207  98.678  1.00  0.00      chA   
ATOM   1410  O   PHE c 174      -4.719  36.740  97.571  1.00  0.00      chA   
ATOM   1411  N   GLU c 175      -4.877  34.864  98.717  1.00  0.00      chA   
ATOM   1412  H   GLU c 175      -4.879  34.482  99.652  1.00  0.00      chA   
ATOM   1413  CA  GLU c 175      -4.808  33.924  97.577  1.00  0.00      chA   
ATOM   1414  HA  GLU c 175      -4.930  34.438  96.624  1.00  0.00      chA   
ATOM   1415  CB  GLU c 175      -3.463  33.155  97.520  1.00  0.00      chA   
ATOM   1416  HB2 GLU c 175      -3.376  32.743  98.526  1.00  0.00      chA   
ATOM   1417  HB3 GLU c 175      -3.413  32.419  96.717  1.00  0.00      chA   
ATOM   1418  CG  GLU c 175      -2.251  34.182  97.479  1.00  0.00      chA   
ATOM   1419  HG2 GLU c 175      -2.299  34.900  98.298  1.00  0.00      chA   
ATOM   1420  HG3 GLU c 175      -1.363  33.576  97.651  1.00  0.00      chA   
ATOM   1421  CD  GLU c 175      -2.120  34.913  96.146  1.00  0.00      chA   
ATOM   1422  OE1 GLU c 175      -2.982  34.720  95.204  1.00  0.00      chA   
ATOM   1423  OE2 GLU c 175      -1.314  35.857  96.016  1.00  0.00      chA   
ATOM   1424  C   GLU c 175      -5.866  32.842  97.595  1.00  0.00      chA   
ATOM   1425  O   GLU c 175      -6.642  32.584  96.711  1.00  0.00      chA   
ATOM   1426  N   SER c 176      -6.075  32.287  98.829  1.00  0.00      chA   
ATOM   1427  H   SER c 176      -5.388  32.476  99.545  1.00  0.00      chA   
ATOM   1428  CA  SER c 176      -6.981  31.151  99.051  1.00  0.00      chA   
ATOM   1429  HA  SER c 176      -7.901  31.189  98.468  1.00  0.00      chA   
ATOM   1430  CB  SER c 176      -6.257  29.879  98.742  1.00  0.00      chA   
ATOM   1431  HB2 SER c 176      -5.528  29.952  97.937  1.00  0.00      chA   
ATOM   1432  HB3 SER c 176      -5.719  29.530  99.623  1.00  0.00      chA   
ATOM   1433  OG  SER c 176      -7.198  28.950  98.403  1.00  0.00      chA   
ATOM   1434  HG  SER c 176      -7.121  28.754  97.467  1.00  0.00      chA   
ATOM   1435  C   SER c 176      -7.465  31.028 100.468  1.00  0.00      chA   
ATOM   1436  O   SER c 176      -6.663  31.143 101.431  1.00  0.00      chA   
ATOM   1437  N   VAL c 177      -8.751  30.623 100.607  1.00  0.00      chA   
ATOM   1438  H   VAL c 177      -9.353  30.616  99.794  1.00  0.00      chA   
ATOM   1439  CA  VAL c 177      -9.200  30.199 101.929  1.00  0.00      chA   
ATOM   1440  HA  VAL c 177      -8.696  30.828 102.663  1.00  0.00      chA   
ATOM   1441  CB  VAL c 177     -10.629  30.377 102.226  1.00  0.00      chA   
ATOM   1442  HB  VAL c 177     -11.209  30.043 101.365  1.00  0.00      chA   
ATOM   1443  CG1 VAL c 177     -11.027  29.569 103.449  1.00  0.00      chA   
ATOM   1444 HG11 VAL c 177     -12.109  29.434 103.463  1.00  0.00      chA   
ATOM   1445 HG12 VAL c 177     -10.637  28.552 103.478  1.00  0.00      chA   
ATOM   1446 HG13 VAL c 177     -10.595  29.971 104.365  1.00  0.00      chA   
ATOM   1447  CG2 VAL c 177     -11.026  31.835 102.363  1.00  0.00      chA   
ATOM   1448 HG21 VAL c 177     -10.696  32.377 101.477  1.00  0.00      chA   
ATOM   1449 HG22 VAL c 177     -12.088  32.026 102.521  1.00  0.00      chA   
ATOM   1450 HG23 VAL c 177     -10.494  32.286 103.200  1.00  0.00      chA   
ATOM   1451  C   VAL c 177      -8.624  28.763 102.092  1.00  0.00      chA   
ATOM   1452  O   VAL c 177      -9.059  27.819 101.353  1.00  0.00      chA   
ATOM   1453  N   ALA c 178      -7.564  28.609 102.934  1.00  0.00      chA   
ATOM   1454  H   ALA c 178      -7.335  29.438 103.466  1.00  0.00      chA   
ATOM   1455  CA  ALA c 178      -6.765  27.396 102.909  1.00  0.00      chA   
ATOM   1456  HA  ALA c 178      -7.486  26.580 102.966  1.00  0.00      chA   
ATOM   1457  CB  ALA c 178      -6.038  27.357 101.624  1.00  0.00      chA   
ATOM   1458  HB1 ALA c 178      -5.404  26.471 101.593  1.00  0.00      chA   
ATOM   1459  HB2 ALA c 178      -6.717  27.389 100.772  1.00  0.00      chA   
ATOM   1460  HB3 ALA c 178      -5.410  28.243 101.540  1.00  0.00      chA   
ATOM   1461  C   ALA c 178      -5.825  27.185 104.091  1.00  0.00      chA   
ATOM   1462  O   ALA c 178      -5.208  28.042 104.689  1.00  0.00      chA   
ATOM   1463  N   TRP c 179      -5.708  25.840 104.369  1.00  0.00      chA   
ATOM   1464  H   TRP c 179      -6.340  25.207 103.901  1.00  0.00      chA   
ATOM   1465  CA  TRP c 179      -4.846  25.140 105.394  1.00  0.00      chA   
ATOM   1466  HA  TRP c 179      -4.332  25.998 105.828  1.00  0.00      chA   
ATOM   1467  CB  TRP c 179      -5.678  24.568 106.637  1.00  0.00      chA   
ATOM   1468  HB2 TRP c 179      -4.976  23.942 107.189  1.00  0.00      chA   
ATOM   1469  HB3 TRP c 179      -6.016  25.455 107.174  1.00  0.00      chA   
ATOM   1470  CG  TRP c 179      -6.952  23.794 106.484  1.00  0.00      chA   
ATOM   1471  CD1 TRP c 179      -8.191  24.150 106.987  1.00  0.00      chA   
ATOM   1472  HD1 TRP c 179      -8.401  25.086 107.481  1.00  0.00      chA   
ATOM   1473  NE1 TRP c 179      -9.158  23.099 106.670  1.00  0.00      chA   
ATOM   1474  HE1 TRP c 179     -10.101  23.241 107.005  1.00  0.00      chA   
ATOM   1475  CE2 TRP c 179      -8.546  22.023 106.148  1.00  0.00      chA   
ATOM   1476  CZ2 TRP c 179      -8.990  20.700 105.785  1.00  0.00      chA   
ATOM   1477  HZ2 TRP c 179     -10.038  20.439 105.824  1.00  0.00      chA   
ATOM   1478  CH2 TRP c 179      -8.055  19.830 105.193  1.00  0.00      chA   
ATOM   1479  HH2 TRP c 179      -8.312  18.855 104.807  1.00  0.00      chA   
ATOM   1480  CZ3 TRP c 179      -6.698  20.235 104.988  1.00  0.00      chA   
ATOM   1481  HZ3 TRP c 179      -6.043  19.611 104.399  1.00  0.00      chA   
ATOM   1482  CE3 TRP c 179      -6.360  21.526 105.310  1.00  0.00      chA   
ATOM   1483  HE3 TRP c 179      -5.332  21.765 105.083  1.00  0.00      chA   
ATOM   1484  CD2 TRP c 179      -7.195  22.459 105.939  1.00  0.00      chA   
ATOM   1485  C   TRP c 179      -3.823  24.092 104.905  1.00  0.00      chA   
ATOM   1486  O   TRP c 179      -3.014  23.721 105.718  1.00  0.00      chA   
ATOM   1487  N   SER c 180      -3.801  23.803 103.650  1.00  0.00      chA   
ATOM   1488  H   SER c 180      -4.603  24.135 103.135  1.00  0.00      chA   
ATOM   1489  CA  SER c 180      -2.756  23.115 102.880  1.00  0.00      chA   
ATOM   1490  HA  SER c 180      -1.767  23.446 103.199  1.00  0.00      chA   
ATOM   1491  CB  SER c 180      -2.832  21.551 103.046  1.00  0.00      chA   
ATOM   1492  HB2 SER c 180      -2.884  21.191 104.074  1.00  0.00      chA   
ATOM   1493  HB3 SER c 180      -3.859  21.388 102.717  1.00  0.00      chA   
ATOM   1494  OG  SER c 180      -1.930  20.733 102.288  1.00  0.00      chA   
ATOM   1495  HG  SER c 180      -1.047  21.108 102.308  1.00  0.00      chA   
ATOM   1496  C   SER c 180      -2.789  23.632 101.407  1.00  0.00      chA   
ATOM   1497  O   SER c 180      -3.853  23.940 100.878  1.00  0.00      chA   
ATOM   1498  N   ALA c 181      -1.550  23.919 100.930  1.00  0.00      chA   
ATOM   1499  H   ALA c 181      -0.750  23.541 101.419  1.00  0.00      chA   
ATOM   1500  CA  ALA c 181      -1.423  24.933  99.801  1.00  0.00      chA   
ATOM   1501  HA  ALA c 181      -2.292  24.825  99.153  1.00  0.00      chA   
ATOM   1502  CB  ALA c 181      -1.370  26.307 100.434  1.00  0.00      chA   
ATOM   1503  HB1 ALA c 181      -0.446  26.495 100.979  1.00  0.00      chA   
ATOM   1504  HB2 ALA c 181      -1.272  27.009  99.606  1.00  0.00      chA   
ATOM   1505  HB3 ALA c 181      -2.326  26.508 100.918  1.00  0.00      chA   
ATOM   1506  C   ALA c 181      -0.281  24.747  98.908  1.00  0.00      chA   
ATOM   1507  O   ALA c 181       0.712  24.048  99.104  1.00  0.00      chA   
ATOM   1508  N   SER c 182      -0.346  25.487  97.801  1.00  0.00      chA   
ATOM   1509  H   SER c 182      -1.199  25.998  97.630  1.00  0.00      chA   
ATOM   1510  CA  SER c 182       0.723  25.635  96.807  1.00  0.00      chA   
ATOM   1511  HA  SER c 182       1.682  25.823  97.291  1.00  0.00      chA   
ATOM   1512  CB  SER c 182       0.886  24.333  96.036  1.00  0.00      chA   
ATOM   1513  HB2 SER c 182       1.192  23.543  96.722  1.00  0.00      chA   
ATOM   1514  HB3 SER c 182      -0.077  24.091  95.584  1.00  0.00      chA   
ATOM   1515  OG  SER c 182       1.902  24.330  94.972  1.00  0.00      chA   
ATOM   1516  HG  SER c 182       2.731  24.301  95.453  1.00  0.00      chA   
ATOM   1517  C   SER c 182       0.502  26.744  95.793  1.00  0.00      chA   
ATOM   1518  O   SER c 182      -0.633  27.194  95.587  1.00  0.00      chA   
ATOM   1519  N   ALA c 183       1.509  27.171  95.048  1.00  0.00      chA   
ATOM   1520  H   ALA c 183       2.396  26.688  95.042  1.00  0.00      chA   
ATOM   1521  CA  ALA c 183       1.477  28.335  94.141  1.00  0.00      chA   
ATOM   1522  HA  ALA c 183       0.617  28.145  93.499  1.00  0.00      chA   
ATOM   1523  CB  ALA c 183       1.339  29.569  95.016  1.00  0.00      chA   
ATOM   1524  HB1 ALA c 183       2.309  29.906  95.382  1.00  0.00      chA   
ATOM   1525  HB2 ALA c 183       0.973  30.344  94.342  1.00  0.00      chA   
ATOM   1526  HB3 ALA c 183       0.691  29.499  95.890  1.00  0.00      chA   
ATOM   1527  C   ALA c 183       2.672  28.404  93.128  1.00  0.00      chA   
ATOM   1528  O   ALA c 183       3.776  27.955  93.457  1.00  0.00      chA   
ATOM   1529  N   CYX c 184       2.458  28.999  91.949  1.00  0.00      chA   
ATOM   1530  H   CYX c 184       1.564  29.439  91.790  1.00  0.00      chA   
ATOM   1531  CA  CYX c 184       3.358  28.884  90.731  1.00  0.00      chA   
ATOM   1532  HA  CYX c 184       4.407  29.134  90.902  1.00  0.00      chA   
ATOM   1533  CB  CYX c 184       3.213  27.464  90.077  1.00  0.00      chA   
ATOM   1534  HB2 CYX c 184       3.686  27.544  89.099  1.00  0.00      chA   
ATOM   1535  HB3 CYX c 184       3.875  26.846  90.684  1.00  0.00      chA   
ATOM   1536  SG  CYX c 184       1.556  26.737  89.942  1.00  0.00      chA   
ATOM   1537  C   CYX c 184       2.809  29.942  89.692  1.00  0.00      chA   
ATOM   1538  O   CYX c 184       1.797  30.661  89.909  1.00  0.00      chA   
ATOM   1539  N   HID c 185       3.429  30.090  88.544  1.00  0.00      chA   
ATOM   1540  H   HID c 185       4.325  29.682  88.320  1.00  0.00      chA   
ATOM   1541  CA  HID c 185       3.065  30.990  87.449  1.00  0.00      chA   
ATOM   1542  HA  HID c 185       2.017  31.284  87.508  1.00  0.00      chA   
ATOM   1543  CB  HID c 185       4.010  32.233  87.676  1.00  0.00      chA   
ATOM   1544  HB2 HID c 185       3.707  32.916  88.470  1.00  0.00      chA   
ATOM   1545  HB3 HID c 185       5.077  32.009  87.677  1.00  0.00      chA   
ATOM   1546  CG  HID c 185       4.041  33.297  86.547  1.00  0.00      chA   
ATOM   1547  ND1 HID c 185       3.364  34.471  86.505  1.00  0.00      chA   
ATOM   1548  HD1 HID c 185       2.957  34.956  87.291  1.00  0.00      chA   
ATOM   1549  CE1 HID c 185       3.456  35.026  85.271  1.00  0.00      chA   
ATOM   1550  HE1 HID c 185       3.148  35.980  84.871  1.00  0.00      chA   
ATOM   1551  NE2 HID c 185       4.188  34.166  84.541  1.00  0.00      chA   
ATOM   1552  CD2 HID c 185       4.687  33.094  85.353  1.00  0.00      chA   
ATOM   1553  HD2 HID c 185       5.151  32.195  84.977  1.00  0.00      chA   
ATOM   1554  C   HID c 185       3.219  30.376  86.090  1.00  0.00      chA   
ATOM   1555  O   HID c 185       4.324  29.949  85.664  1.00  0.00      chA   
ATOM   1556  N   ASP c 186       2.210  30.500  85.230  1.00  0.00      chA   
ATOM   1557  H   ASP c 186       1.320  30.897  85.497  1.00  0.00      chA   
ATOM   1558  CA  ASP c 186       2.229  29.736  84.014  1.00  0.00      chA   
ATOM   1559  HA  ASP c 186       2.561  28.735  84.287  1.00  0.00      chA   
ATOM   1560  CB  ASP c 186       0.853  29.353  83.505  1.00  0.00      chA   
ATOM   1561  HB2 ASP c 186       0.838  28.327  83.137  1.00  0.00      chA   
ATOM   1562  HB3 ASP c 186       0.194  29.290  84.371  1.00  0.00      chA   
ATOM   1563  CG  ASP c 186       0.331  30.301  82.382  1.00  0.00      chA   
ATOM   1564  OD1 ASP c 186       0.336  31.485  82.590  1.00  0.00      chA   
ATOM   1565  OD2 ASP c 186      -0.144  29.744  81.332  1.00  0.00      chA   
ATOM   1566  C   ASP c 186       3.168  30.265  82.952  1.00  0.00      chA   
ATOM   1567  O   ASP c 186       3.428  29.619  82.026  1.00  0.00      chA   
ATOM   1568  N   GLY c 187       3.643  31.469  83.067  1.00  0.00      chA   
ATOM   1569  H   GLY c 187       3.568  31.850  83.999  1.00  0.00      chA   
ATOM   1570  CA  GLY c 187       4.430  32.282  82.136  1.00  0.00      chA   
ATOM   1571  HA2 GLY c 187       5.102  32.939  82.686  1.00  0.00      chA   
ATOM   1572  HA3 GLY c 187       5.028  31.743  81.401  1.00  0.00      chA   
ATOM   1573  C   GLY c 187       3.632  33.310  81.389  1.00  0.00      chA   
ATOM   1574  O   GLY c 187       4.172  34.182  80.729  1.00  0.00      chA   
ATOM   1575  N   THR c 188       2.344  33.344  81.756  1.00  0.00      chA   
ATOM   1576  H   THR c 188       1.987  32.646  82.393  1.00  0.00      chA   
ATOM   1577  CA  THR c 188       1.331  34.363  81.324  1.00  0.00      chA   
ATOM   1578  HA  THR c 188       1.882  35.204  80.902  1.00  0.00      chA   
ATOM   1579  CB  THR c 188       0.299  33.757  80.364  1.00  0.00      chA   
ATOM   1580  HB  THR c 188      -0.654  33.725  80.892  1.00  0.00      chA   
ATOM   1581  CG2 THR c 188       0.056  34.585  79.148  1.00  0.00      chA   
ATOM   1582 HG21 THR c 188      -0.512  34.084  78.364  1.00  0.00      chA   
ATOM   1583 HG22 THR c 188      -0.446  35.497  79.473  1.00  0.00      chA   
ATOM   1584 HG23 THR c 188       1.039  34.830  78.748  1.00  0.00      chA   
ATOM   1585  OG1 THR c 188       0.557  32.428  80.089  1.00  0.00      chA   
ATOM   1586  HG1 THR c 188       0.684  32.005  80.941  1.00  0.00      chA   
ATOM   1587  C   THR c 188       0.599  34.941  82.586  1.00  0.00      chA   
ATOM   1588  O   THR c 188       0.382  36.121  82.571  1.00  0.00      chA   
ATOM   1589  N   SER c 189       0.277  34.185  83.607  1.00  0.00      chA   
ATOM   1590  H   SER c 189       0.606  33.240  83.475  1.00  0.00      chA   
ATOM   1591  CA  SER c 189      -0.374  34.624  84.834  1.00  0.00      chA   
ATOM   1592  HA  SER c 189       0.000  35.596  85.155  1.00  0.00      chA   
ATOM   1593  CB  SER c 189      -1.883  34.727  84.755  1.00  0.00      chA   
ATOM   1594  HB2 SER c 189      -2.199  33.746  85.111  1.00  0.00      chA   
ATOM   1595  HB3 SER c 189      -2.279  35.386  85.528  1.00  0.00      chA   
ATOM   1596  OG  SER c 189      -2.365  35.108  83.462  1.00  0.00      chA   
ATOM   1597  HG  SER c 189      -2.250  34.372  82.856  1.00  0.00      chA   
ATOM   1598  C   SER c 189      -0.004  33.682  86.051  1.00  0.00      chA   
ATOM   1599  O   SER c 189       0.400  32.571  85.808  1.00  0.00      chA   
ATOM   1600  N   TRP c 190      -0.145  34.165  87.278  1.00  0.00      chA   
ATOM   1601  H   TRP c 190      -0.244  35.162  87.406  1.00  0.00      chA   
ATOM   1602  CA  TRP c 190      -0.015  33.331  88.468  1.00  0.00      chA   
ATOM   1603  HA  TRP c 190       0.890  32.744  88.318  1.00  0.00      chA   
ATOM   1604  CB  TRP c 190       0.104  34.244  89.751  1.00  0.00      chA   
ATOM   1605  HB2 TRP c 190      -0.734  34.937  89.818  1.00  0.00      chA   
ATOM   1606  HB3 TRP c 190       0.058  33.631  90.650  1.00  0.00      chA   
ATOM   1607  CG  TRP c 190       1.399  35.004  89.820  1.00  0.00      chA   
ATOM   1608  CD1 TRP c 190       1.676  36.149  89.131  1.00  0.00      chA   
ATOM   1609  HD1 TRP c 190       1.048  36.610  88.384  1.00  0.00      chA   
ATOM   1610  NE1 TRP c 190       3.011  36.504  89.383  1.00  0.00      chA   
ATOM   1611  HE1 TRP c 190       3.497  37.298  88.990  1.00  0.00      chA   
ATOM   1612  CE2 TRP c 190       3.654  35.574  90.202  1.00  0.00      chA   
ATOM   1613  CZ2 TRP c 190       4.936  35.437  90.762  1.00  0.00      chA   
ATOM   1614  HZ2 TRP c 190       5.730  36.156  90.619  1.00  0.00      chA   
ATOM   1615  CH2 TRP c 190       5.196  34.409  91.701  1.00  0.00      chA   
ATOM   1616  HH2 TRP c 190       6.172  34.310  92.154  1.00  0.00      chA   
ATOM   1617  CZ3 TRP c 190       4.245  33.370  91.881  1.00  0.00      chA   
ATOM   1618  HZ3 TRP c 190       4.457  32.515  92.506  1.00  0.00      chA   
ATOM   1619  CE3 TRP c 190       2.925  33.549  91.365  1.00  0.00      chA   
ATOM   1620  HE3 TRP c 190       2.123  32.871  91.619  1.00  0.00      chA   
ATOM   1621  CD2 TRP c 190       2.638  34.611  90.489  1.00  0.00      chA   
ATOM   1622  C   TRP c 190      -1.218  32.333  88.681  1.00  0.00      chA   
ATOM   1623  O   TRP c 190      -2.388  32.497  88.346  1.00  0.00      chA   
ATOM   1624  N   LEU c 191      -0.892  31.220  89.295  1.00  0.00      chA   
ATOM   1625  H   LEU c 191      -0.004  31.148  89.771  1.00  0.00      chA   
ATOM   1626  CA  LEU c 191      -1.677  30.080  89.579  1.00  0.00      chA   
ATOM   1627  HA  LEU c 191      -2.726  30.312  89.395  1.00  0.00      chA   
ATOM   1628  CB  LEU c 191      -1.299  29.063  88.522  1.00  0.00      chA   
ATOM   1629  HB2 LEU c 191      -0.779  29.615  87.740  1.00  0.00      chA   
ATOM   1630  HB3 LEU c 191      -0.516  28.406  88.904  1.00  0.00      chA   
ATOM   1631  CG  LEU c 191      -2.358  28.133  87.860  1.00  0.00      chA   
ATOM   1632  HG  LEU c 191      -3.281  28.693  87.705  1.00  0.00      chA   
ATOM   1633  CD1 LEU c 191      -1.705  27.395  86.631  1.00  0.00      chA   
ATOM   1634 HD11 LEU c 191      -0.883  26.805  87.037  1.00  0.00      chA   
ATOM   1635 HD12 LEU c 191      -2.424  26.701  86.195  1.00  0.00      chA   
ATOM   1636 HD13 LEU c 191      -1.389  28.117  85.879  1.00  0.00      chA   
ATOM   1637  CD2 LEU c 191      -2.788  26.998  88.835  1.00  0.00      chA   
ATOM   1638 HD21 LEU c 191      -1.990  26.261  88.930  1.00  0.00      chA   
ATOM   1639 HD22 LEU c 191      -3.070  27.429  89.795  1.00  0.00      chA   
ATOM   1640 HD23 LEU c 191      -3.643  26.475  88.406  1.00  0.00      chA   
ATOM   1641  C   LEU c 191      -1.511  29.626  91.041  1.00  0.00      chA   
ATOM   1642  O   LEU c 191      -0.418  29.639  91.569  1.00  0.00      chA   
ATOM   1643  N   THR c 192      -2.621  29.507  91.762  1.00  0.00      chA   
ATOM   1644  H   THR c 192      -3.500  29.592  91.271  1.00  0.00      chA   
ATOM   1645  CA  THR c 192      -2.650  29.183  93.212  1.00  0.00      chA   
ATOM   1646  HA  THR c 192      -1.663  28.940  93.603  1.00  0.00      chA   
ATOM   1647  CB  THR c 192      -3.030  30.387  94.100  1.00  0.00      chA   
ATOM   1648  HB  THR c 192      -3.313  30.011  95.083  1.00  0.00      chA   
ATOM   1649  CG2 THR c 192      -1.966  31.414  94.347  1.00  0.00      chA   
ATOM   1650 HG21 THR c 192      -1.402  31.740  93.474  1.00  0.00      chA   
ATOM   1651 HG22 THR c 192      -2.416  32.241  94.896  1.00  0.00      chA   
ATOM   1652 HG23 THR c 192      -1.103  31.079  94.921  1.00  0.00      chA   
ATOM   1653  OG1 THR c 192      -4.099  31.230  93.628  1.00  0.00      chA   
ATOM   1654  HG1 THR c 192      -3.905  32.079  94.029  1.00  0.00      chA   
ATOM   1655  C   THR c 192      -3.636  28.071  93.629  1.00  0.00      chA   
ATOM   1656  O   THR c 192      -4.794  28.068  93.141  1.00  0.00      chA   
ATOM   1657  N   ILE c 193      -3.214  27.253  94.592  1.00  0.00      chA   
ATOM   1658  H   ILE c 193      -2.297  27.500  94.933  1.00  0.00      chA   
ATOM   1659  CA  ILE c 193      -3.886  26.040  95.046  1.00  0.00      chA   
ATOM   1660  HA  ILE c 193      -4.845  26.019  94.528  1.00  0.00      chA   
ATOM   1661  CB  ILE c 193      -3.052  24.764  94.608  1.00  0.00      chA   
ATOM   1662  HB  ILE c 193      -2.251  24.563  95.319  1.00  0.00      chA   
ATOM   1663  CG2 ILE c 193      -3.947  23.608  94.683  1.00  0.00      chA   
ATOM   1664 HG21 ILE c 193      -4.901  23.772  94.181  1.00  0.00      chA   
ATOM   1665 HG22 ILE c 193      -3.462  22.750  94.218  1.00  0.00      chA   
ATOM   1666 HG23 ILE c 193      -4.128  23.265  95.702  1.00  0.00      chA   
ATOM   1667  CG1 ILE c 193      -2.307  24.904  93.279  1.00  0.00      chA   
ATOM   1668 HG12 ILE c 193      -1.481  25.615  93.282  1.00  0.00      chA   
ATOM   1669 HG13 ILE c 193      -1.807  23.969  93.024  1.00  0.00      chA   
ATOM   1670  CD1 ILE c 193      -3.141  25.177  92.024  1.00  0.00      chA   
ATOM   1671 HD11 ILE c 193      -2.401  25.502  91.293  1.00  0.00      chA   
ATOM   1672 HD12 ILE c 193      -3.469  24.163  91.795  1.00  0.00      chA   
ATOM   1673 HD13 ILE c 193      -3.847  26.002  92.128  1.00  0.00      chA   
ATOM   1674  C   ILE c 193      -4.039  26.196  96.558  1.00  0.00      chA   
ATOM   1675  O   ILE c 193      -3.053  26.545  97.221  1.00  0.00      chA   
ATOM   1676  N   GLY c 194      -5.160  25.748  97.136  1.00  0.00      chA   
ATOM   1677  H   GLY c 194      -5.877  25.392  96.521  1.00  0.00      chA   
ATOM   1678  CA  GLY c 194      -5.359  25.775  98.614  1.00  0.00      chA   
ATOM   1679  HA2 GLY c 194      -4.447  25.414  99.091  1.00  0.00      chA   
ATOM   1680  HA3 GLY c 194      -5.650  26.808  98.798  1.00  0.00      chA   
ATOM   1681  C   GLY c 194      -6.535  24.834  99.015  1.00  0.00      chA   
ATOM   1682  O   GLY c 194      -7.415  24.519  98.146  1.00  0.00      chA   
ATOM   1683  N   ILE c 195      -6.544  24.358 100.287  1.00  0.00      chA   
ATOM   1684  H   ILE c 195      -5.828  24.674 100.925  1.00  0.00      chA   
ATOM   1685  CA  ILE c 195      -7.459  23.282 100.725  1.00  0.00      chA   
ATOM   1686  HA  ILE c 195      -8.231  23.124  99.972  1.00  0.00      chA   
ATOM   1687  CB  ILE c 195      -6.695  21.961 100.905  1.00  0.00      chA   
ATOM   1688  HB  ILE c 195      -5.993  21.940 101.738  1.00  0.00      chA   
ATOM   1689  CG2 ILE c 195      -7.747  20.807 101.140  1.00  0.00      chA   
ATOM   1690 HG21 ILE c 195      -8.048  20.811 102.188  1.00  0.00      chA   
ATOM   1691 HG22 ILE c 195      -8.580  21.028 100.473  1.00  0.00      chA   
ATOM   1692 HG23 ILE c 195      -7.390  19.806 100.897  1.00  0.00      chA   
ATOM   1693  CG1 ILE c 195      -5.873  21.518  99.659  1.00  0.00      chA   
ATOM   1694 HG12 ILE c 195      -6.597  21.361  98.858  1.00  0.00      chA   
ATOM   1695 HG13 ILE c 195      -5.294  22.409  99.415  1.00  0.00      chA   
ATOM   1696  CD1 ILE c 195      -4.968  20.307  99.682  1.00  0.00      chA   
ATOM   1697 HD11 ILE c 195      -4.225  20.455 100.466  1.00  0.00      chA   
ATOM   1698 HD12 ILE c 195      -5.587  19.448  99.943  1.00  0.00      chA   
ATOM   1699 HD13 ILE c 195      -4.403  20.154  98.762  1.00  0.00      chA   
ATOM   1700  C   ILE c 195      -8.161  23.717 102.028  1.00  0.00      chA   
ATOM   1701  O   ILE c 195      -7.463  24.011 103.008  1.00  0.00      chA   
ATOM   1702  N   SER c 196      -9.500  23.724 101.991  1.00  0.00      chA   
ATOM   1703  H   SER c 196      -9.911  23.393 101.130  1.00  0.00      chA   
ATOM   1704  CA  SER c 196     -10.242  23.975 103.281  1.00  0.00      chA   
ATOM   1705  HA  SER c 196      -9.607  23.634 104.098  1.00  0.00      chA   
ATOM   1706  CB  SER c 196     -10.372  25.455 103.364  1.00  0.00      chA   
ATOM   1707  HB2 SER c 196      -9.429  25.953 103.138  1.00  0.00      chA   
ATOM   1708  HB3 SER c 196     -11.036  25.936 102.644  1.00  0.00      chA   
ATOM   1709  OG  SER c 196     -10.797  25.940 104.654  1.00  0.00      chA   
ATOM   1710  HG  SER c 196     -10.217  26.651 104.934  1.00  0.00      chA   
ATOM   1711  C   SER c 196     -11.583  23.303 103.236  1.00  0.00      chA   
ATOM   1712  O   SER c 196     -12.213  23.104 102.180  1.00  0.00      chA   
ATOM   1713  N   GLY c 197     -12.094  22.825 104.452  1.00  0.00      chA   
ATOM   1714  H   GLY c 197     -11.556  23.087 105.265  1.00  0.00      chA   
ATOM   1715  CA  GLY c 197     -13.168  21.882 104.472  1.00  0.00      chA   
ATOM   1716  HA2 GLY c 197     -14.148  22.330 104.633  1.00  0.00      chA   
ATOM   1717  HA3 GLY c 197     -13.262  21.416 103.491  1.00  0.00      chA   
ATOM   1718  C   GLY c 197     -13.052  20.784 105.549  1.00  0.00      chA   
ATOM   1719  O   GLY c 197     -12.184  20.968 106.361  1.00  0.00      chA   
ATOM   1720  N   PRO c 198     -13.961  19.772 105.546  1.00  0.00      chA   
ATOM   1721  CD  PRO c 198     -15.141  19.817 104.630  1.00  0.00      chA   
ATOM   1722  HD2 PRO c 198     -14.722  19.897 103.628  1.00  0.00      chA   
ATOM   1723  HD3 PRO c 198     -15.778  20.641 104.950  1.00  0.00      chA   
ATOM   1724  CG  PRO c 198     -15.851  18.507 104.852  1.00  0.00      chA   
ATOM   1725  HG2 PRO c 198     -15.908  17.911 103.940  1.00  0.00      chA   
ATOM   1726  HG3 PRO c 198     -16.792  18.588 105.396  1.00  0.00      chA   
ATOM   1727  CB  PRO c 198     -14.921  17.690 105.720  1.00  0.00      chA   
ATOM   1728  HB2 PRO c 198     -14.484  16.851 105.179  1.00  0.00      chA   
ATOM   1729  HB3 PRO c 198     -15.541  17.229 106.490  1.00  0.00      chA   
ATOM   1730  CA  PRO c 198     -14.055  18.648 106.500  1.00  0.00      chA   
ATOM   1731  HA  PRO c 198     -14.562  19.093 107.356  1.00  0.00      chA   
ATOM   1732  C   PRO c 198     -12.718  17.974 106.823  1.00  0.00      chA   
ATOM   1733  O   PRO c 198     -11.839  17.819 106.029  1.00  0.00      chA   
ATOM   1734  N   ASP c 199     -12.446  17.464 108.023  1.00  0.00      chA   
ATOM   1735  H   ASP c 199     -13.178  17.433 108.720  1.00  0.00      chA   
ATOM   1736  CA  ASP c 199     -11.221  16.763 108.402  1.00  0.00      chA   
ATOM   1737  HA  ASP c 199     -10.433  17.366 107.950  1.00  0.00      chA   
ATOM   1738  CB  ASP c 199     -11.185  16.691 109.976  1.00  0.00      chA   
ATOM   1739  HB2 ASP c 199     -11.959  17.373 110.330  1.00  0.00      chA   
ATOM   1740  HB3 ASP c 199     -11.447  15.660 110.214  1.00  0.00      chA   
ATOM   1741  CG  ASP c 199      -9.834  17.058 110.512  1.00  0.00      chA   
ATOM   1742  OD1 ASP c 199      -9.368  18.167 110.272  1.00  0.00      chA   
ATOM   1743  OD2 ASP c 199      -9.228  16.173 111.131  1.00  0.00      chA   
ATOM   1744  C   ASP c 199     -10.982  15.406 107.747  1.00  0.00      chA   
ATOM   1745  O   ASP c 199      -9.836  14.946 107.638  1.00  0.00      chA   
ATOM   1746  N   ASN c 200     -12.138  14.911 107.163  1.00  0.00      chA   
ATOM   1747  H   ASN c 200     -13.019  15.366 107.350  1.00  0.00      chA   
ATOM   1748  CA  ASN c 200     -12.220  13.617 106.438  1.00  0.00      chA   
ATOM   1749  HA  ASN c 200     -11.221  13.217 106.265  1.00  0.00      chA   
ATOM   1750  CB  ASN c 200     -13.157  12.734 107.330  1.00  0.00      chA   
ATOM   1751  HB2 ASN c 200     -13.138  11.729 106.905  1.00  0.00      chA   
ATOM   1752  HB3 ASN c 200     -12.907  12.719 108.390  1.00  0.00      chA   
ATOM   1753  CG  ASN c 200     -14.629  13.290 107.252  1.00  0.00      chA   
ATOM   1754  OD1 ASN c 200     -14.957  14.428 107.056  1.00  0.00      chA   
ATOM   1755  ND2 ASN c 200     -15.614  12.415 107.451  1.00  0.00      chA   
ATOM   1756 HD21 ASN c 200     -16.599  12.628 107.387  1.00  0.00      chA   
ATOM   1757 HD22 ASN c 200     -15.314  11.490 107.726  1.00  0.00      chA   
ATOM   1758  C   ASN c 200     -12.737  13.807 104.992  1.00  0.00      chA   
ATOM   1759  O   ASN c 200     -13.050  12.850 104.323  1.00  0.00      chA   
ATOM   1760  N   GLY c 201     -12.972  15.012 104.561  1.00  0.00      chA   
ATOM   1761  H   GLY c 201     -12.698  15.799 105.132  1.00  0.00      chA   
ATOM   1762  CA  GLY c 201     -13.633  15.333 103.301  1.00  0.00      chA   
ATOM   1763  HA2 GLY c 201     -13.291  14.633 102.539  1.00  0.00      chA   
ATOM   1764  HA3 GLY c 201     -14.684  15.050 103.364  1.00  0.00      chA   
ATOM   1765  C   GLY c 201     -13.317  16.721 102.786  1.00  0.00      chA   
ATOM   1766  O   GLY c 201     -14.213  17.312 102.119  1.00  0.00      chA   
ATOM   1767  N   ALA c 202     -12.164  17.326 103.030  1.00  0.00      chA   
ATOM   1768  H   ALA c 202     -11.533  16.832 103.644  1.00  0.00      chA   
ATOM   1769  CA  ALA c 202     -11.854  18.642 102.446  1.00  0.00      chA   
ATOM   1770  HA  ALA c 202     -12.642  19.295 102.820  1.00  0.00      chA   
ATOM   1771  CB  ALA c 202     -10.461  18.946 103.017  1.00  0.00      chA   
ATOM   1772  HB1 ALA c 202     -10.156  19.919 102.631  1.00  0.00      chA   
ATOM   1773  HB2 ALA c 202     -10.493  19.083 104.098  1.00  0.00      chA   
ATOM   1774  HB3 ALA c 202      -9.732  18.190 102.725  1.00  0.00      chA   
ATOM   1775  C   ALA c 202     -11.845  18.670 100.874  1.00  0.00      chA   
ATOM   1776  O   ALA c 202     -11.943  17.643 100.226  1.00  0.00      chA   
ATOM   1777  N   VAL c 203     -11.655  19.883 100.205  1.00  0.00      chA   
ATOM   1778  H   VAL c 203     -11.639  20.753 100.718  1.00  0.00      chA   
ATOM   1779  CA  VAL c 203     -11.659  20.024  98.746  1.00  0.00      chA   
ATOM   1780  HA  VAL c 203     -11.328  19.058  98.369  1.00  0.00      chA   
ATOM   1781  CB  VAL c 203     -13.051  20.428  98.199  1.00  0.00      chA   
ATOM   1782  HB  VAL c 203     -13.500  21.073  98.954  1.00  0.00      chA   
ATOM   1783  CG1 VAL c 203     -12.945  21.216  96.864  1.00  0.00      chA   
ATOM   1784 HG11 VAL c 203     -13.890  21.588  96.471  1.00  0.00      chA   
ATOM   1785 HG12 VAL c 203     -12.305  22.093  96.955  1.00  0.00      chA   
ATOM   1786 HG13 VAL c 203     -12.506  20.556  96.117  1.00  0.00      chA   
ATOM   1787  CG2 VAL c 203     -13.971  19.250  98.015  1.00  0.00      chA   
ATOM   1788 HG21 VAL c 203     -13.825  18.514  98.806  1.00  0.00      chA   
ATOM   1789 HG22 VAL c 203     -14.956  19.714  97.965  1.00  0.00      chA   
ATOM   1790 HG23 VAL c 203     -13.816  18.784  97.042  1.00  0.00      chA   
ATOM   1791  C   VAL c 203     -10.501  21.002  98.482  1.00  0.00      chA   
ATOM   1792  O   VAL c 203     -10.427  22.040  99.105  1.00  0.00      chA   
ATOM   1793  N   ALA c 204      -9.612  20.657  97.511  1.00  0.00      chA   
ATOM   1794  H   ALA c 204      -9.686  19.764  97.045  1.00  0.00      chA   
ATOM   1795  CA  ALA c 204      -8.704  21.663  96.939  1.00  0.00      chA   
ATOM   1796  HA  ALA c 204      -8.277  22.263  97.742  1.00  0.00      chA   
ATOM   1797  CB  ALA c 204      -7.509  20.974  96.310  1.00  0.00      chA   
ATOM   1798  HB1 ALA c 204      -7.708  20.221  95.548  1.00  0.00      chA   
ATOM   1799  HB2 ALA c 204      -6.829  21.737  95.932  1.00  0.00      chA   
ATOM   1800  HB3 ALA c 204      -6.963  20.447  97.092  1.00  0.00      chA   
ATOM   1801  C   ALA c 204      -9.521  22.567  95.930  1.00  0.00      chA   
ATOM   1802  O   ALA c 204     -10.300  22.101  95.115  1.00  0.00      chA   
ATOM   1803  N   VAL c 205      -9.186  23.858  95.816  1.00  0.00      chA   
ATOM   1804  H   VAL c 205      -8.452  24.225  96.405  1.00  0.00      chA   
ATOM   1805  CA  VAL c 205      -9.681  24.800  94.838  1.00  0.00      chA   
ATOM   1806  HA  VAL c 205     -10.376  24.385  94.107  1.00  0.00      chA   
ATOM   1807  CB  VAL c 205     -10.503  25.851  95.595  1.00  0.00      chA   
ATOM   1808  HB  VAL c 205      -9.814  26.516  96.114  1.00  0.00      chA   
ATOM   1809  CG1 VAL c 205     -11.294  26.656  94.472  1.00  0.00      chA   
ATOM   1810 HG11 VAL c 205     -10.685  27.228  93.772  1.00  0.00      chA   
ATOM   1811 HG12 VAL c 205     -12.037  26.013  93.999  1.00  0.00      chA   
ATOM   1812 HG13 VAL c 205     -11.859  27.391  95.046  1.00  0.00      chA   
ATOM   1813  CG2 VAL c 205     -11.593  25.297  96.520  1.00  0.00      chA   
ATOM   1814 HG21 VAL c 205     -12.335  24.716  95.971  1.00  0.00      chA   
ATOM   1815 HG22 VAL c 205     -11.136  24.618  97.240  1.00  0.00      chA   
ATOM   1816 HG23 VAL c 205     -12.182  26.066  97.019  1.00  0.00      chA   
ATOM   1817  C   VAL c 205      -8.408  25.284  94.066  1.00  0.00      chA   
ATOM   1818  O   VAL c 205      -7.333  25.553  94.590  1.00  0.00      chA   
ATOM   1819  N   LEU c 206      -8.511  25.308  92.794  1.00  0.00      chA   
ATOM   1820  H   LEU c 206      -9.338  24.965  92.328  1.00  0.00      chA   
ATOM   1821  CA  LEU c 206      -7.469  25.656  91.828  1.00  0.00      chA   
ATOM   1822  HA  LEU c 206      -6.506  25.618  92.335  1.00  0.00      chA   
ATOM   1823  CB  LEU c 206      -7.284  24.594  90.689  1.00  0.00      chA   
ATOM   1824  HB2 LEU c 206      -8.289  24.449  90.293  1.00  0.00      chA   
ATOM   1825  HB3 LEU c 206      -6.636  25.074  89.955  1.00  0.00      chA   
ATOM   1826  CG  LEU c 206      -6.674  23.273  91.147  1.00  0.00      chA   
ATOM   1827  HG  LEU c 206      -5.829  23.492  91.800  1.00  0.00      chA   
ATOM   1828  CD1 LEU c 206      -7.580  22.424  92.034  1.00  0.00      chA   
ATOM   1829 HD11 LEU c 206      -8.527  22.273  91.517  1.00  0.00      chA   
ATOM   1830 HD12 LEU c 206      -7.164  21.456  92.315  1.00  0.00      chA   
ATOM   1831 HD13 LEU c 206      -7.680  23.053  92.917  1.00  0.00      chA   
ATOM   1832  CD2 LEU c 206      -6.207  22.598  89.861  1.00  0.00      chA   
ATOM   1833 HD21 LEU c 206      -6.961  22.325  89.121  1.00  0.00      chA   
ATOM   1834 HD22 LEU c 206      -5.410  23.137  89.350  1.00  0.00      chA   
ATOM   1835 HD23 LEU c 206      -5.654  21.732  90.223  1.00  0.00      chA   
ATOM   1836  C   LEU c 206      -7.876  26.989  91.263  1.00  0.00      chA   
ATOM   1837  O   LEU c 206      -8.931  27.186  90.741  1.00  0.00      chA   
ATOM   1838  N   LYS c 207      -6.946  27.904  91.270  1.00  0.00      chA   
ATOM   1839  H   LYS c 207      -6.148  27.783  91.877  1.00  0.00      chA   
ATOM   1840  CA  LYS c 207      -7.120  29.256  90.666  1.00  0.00      chA   
ATOM   1841  HA  LYS c 207      -8.111  29.387  90.229  1.00  0.00      chA   
ATOM   1842  CB  LYS c 207      -7.124  30.304  91.836  1.00  0.00      chA   
ATOM   1843  HB2 LYS c 207      -6.144  30.296  92.311  1.00  0.00      chA   
ATOM   1844  HB3 LYS c 207      -7.378  31.290  91.446  1.00  0.00      chA   
ATOM   1845  CG  LYS c 207      -8.215  30.195  92.907  1.00  0.00      chA   
ATOM   1846  HG2 LYS c 207      -9.176  30.191  92.393  1.00  0.00      chA   
ATOM   1847  HG3 LYS c 207      -8.170  29.224  93.402  1.00  0.00      chA   
ATOM   1848  CD  LYS c 207      -8.059  31.421  93.892  1.00  0.00      chA   
ATOM   1849  HD2 LYS c 207      -8.761  31.231  94.704  1.00  0.00      chA   
ATOM   1850  HD3 LYS c 207      -7.094  31.250  94.370  1.00  0.00      chA   
ATOM   1851  CE  LYS c 207      -8.204  32.863  93.451  1.00  0.00      chA   
ATOM   1852  HE2 LYS c 207      -7.553  33.023  92.591  1.00  0.00      chA   
ATOM   1853  HE3 LYS c 207      -9.251  33.019  93.194  1.00  0.00      chA   
ATOM   1854  NZ  LYS c 207      -7.699  33.734  94.501  1.00  0.00      chA   
ATOM   1855  HZ1 LYS c 207      -6.698  33.666  94.627  1.00  0.00      chA   
ATOM   1856  HZ2 LYS c 207      -7.984  34.696  94.390  1.00  0.00      chA   
ATOM   1857  HZ3 LYS c 207      -8.052  33.430  95.399  1.00  0.00      chA   
ATOM   1858  C   LYS c 207      -5.983  29.570  89.676  1.00  0.00      chA   
ATOM   1859  O   LYS c 207      -4.806  29.365  89.985  1.00  0.00      chA   
ATOM   1860  N   TYR c 208      -6.341  30.396  88.705  1.00  0.00      chA   
ATOM   1861  H   TYR c 208      -7.321  30.639  88.752  1.00  0.00      chA   
ATOM   1862  CA  TYR c 208      -5.462  31.160  87.807  1.00  0.00      chA   
ATOM   1863  HA  TYR c 208      -4.440  31.213  88.183  1.00  0.00      chA   
ATOM   1864  CB  TYR c 208      -5.396  30.382  86.499  1.00  0.00      chA   
ATOM   1865  HB2 TYR c 208      -5.017  29.369  86.628  1.00  0.00      chA   
ATOM   1866  HB3 TYR c 208      -6.402  30.177  86.136  1.00  0.00      chA   
ATOM   1867  CG  TYR c 208      -4.539  31.012  85.428  1.00  0.00      chA   
ATOM   1868  CD1 TYR c 208      -5.054  31.701  84.351  1.00  0.00      chA   
ATOM   1869  HD1 TYR c 208      -6.099  31.950  84.252  1.00  0.00      chA   
ATOM   1870  CE1 TYR c 208      -4.232  32.115  83.277  1.00  0.00      chA   
ATOM   1871  HE1 TYR c 208      -4.702  32.712  82.510  1.00  0.00      chA   
ATOM   1872  CZ  TYR c 208      -2.933  31.765  83.319  1.00  0.00      chA   
ATOM   1873  OH  TYR c 208      -2.177  32.191  82.261  1.00  0.00      chA   
ATOM   1874  HH  TYR c 208      -1.222  32.123  82.312  1.00  0.00      chA   
ATOM   1875  CE2 TYR c 208      -2.331  31.170  84.435  1.00  0.00      chA   
ATOM   1876  HE2 TYR c 208      -1.251  31.138  84.459  1.00  0.00      chA   
ATOM   1877  CD2 TYR c 208      -3.158  30.778  85.481  1.00  0.00      chA   
ATOM   1878  HD2 TYR c 208      -2.705  30.353  86.365  1.00  0.00      chA   
ATOM   1879  C   TYR c 208      -5.988  32.559  87.523  1.00  0.00      chA   
ATOM   1880  O   TYR c 208      -7.147  32.864  87.382  1.00  0.00      chA   
ATOM   1881  N   ASN c 209      -5.064  33.536  87.419  1.00  0.00      chA   
ATOM   1882  H   ASN c 209      -4.119  33.181  87.391  1.00  0.00      chA   
ATOM   1883  CA  ASN c 209      -5.156  34.963  87.288  1.00  0.00      chA   
ATOM   1884  HA  ASN c 209      -4.167  35.367  87.497  1.00  0.00      chA   
ATOM   1885  CB  ASN c 209      -5.361  35.250  85.807  1.00  0.00      chA   
ATOM   1886  HB2 ASN c 209      -4.623  34.664  85.259  1.00  0.00      chA   
ATOM   1887  HB3 ASN c 209      -6.350  34.989  85.433  1.00  0.00      chA   
ATOM   1888  CG  ASN c 209      -5.070  36.724  85.523  1.00  0.00      chA   
ATOM   1889  OD1 ASN c 209      -4.007  37.264  85.852  1.00  0.00      chA   
ATOM   1890  ND2 ASN c 209      -6.052  37.417  84.958  1.00  0.00      chA   
ATOM   1891 HD21 ASN c 209      -5.958  38.331  84.540  1.00  0.00      chA   
ATOM   1892 HD22 ASN c 209      -6.937  36.939  84.867  1.00  0.00      chA   
ATOM   1893  C   ASN c 209      -6.123  35.662  88.314  1.00  0.00      chA   
ATOM   1894  O   ASN c 209      -6.856  36.547  87.984  1.00  0.00      chA   
ATOM   1895  N   GLY c 210      -6.168  35.183  89.568  1.00  0.00      chA   
ATOM   1896  H   GLY c 210      -5.609  34.410  89.899  1.00  0.00      chA   
ATOM   1897  CA  GLY c 210      -6.944  35.850  90.711  1.00  0.00      chA   
ATOM   1898  HA2 GLY c 210      -6.405  35.757  91.654  1.00  0.00      chA   
ATOM   1899  HA3 GLY c 210      -7.115  36.902  90.486  1.00  0.00      chA   
ATOM   1900  C   GLY c 210      -8.400  35.383  90.880  1.00  0.00      chA   
ATOM   1901  O   GLY c 210      -9.080  35.946  91.775  1.00  0.00      chA   
ATOM   1902  N   ILE c 211      -8.867  34.411  90.097  1.00  0.00      chA   
ATOM   1903  H   ILE c 211      -8.151  34.034  89.494  1.00  0.00      chA   
ATOM   1904  CA  ILE c 211     -10.239  33.827  90.142  1.00  0.00      chA   
ATOM   1905  HA  ILE c 211     -10.556  33.984  91.174  1.00  0.00      chA   
ATOM   1906  CB  ILE c 211     -11.163  34.525  89.124  1.00  0.00      chA   
ATOM   1907  HB  ILE c 211     -12.147  34.071  89.241  1.00  0.00      chA   
ATOM   1908  CG2 ILE c 211     -11.335  35.991  89.466  1.00  0.00      chA   
ATOM   1909 HG21 ILE c 211     -11.693  36.077  90.492  1.00  0.00      chA   
ATOM   1910 HG22 ILE c 211     -10.351  36.447  89.368  1.00  0.00      chA   
ATOM   1911 HG23 ILE c 211     -11.953  36.530  88.748  1.00  0.00      chA   
ATOM   1912  CG1 ILE c 211     -10.719  34.265  87.616  1.00  0.00      chA   
ATOM   1913 HG12 ILE c 211      -9.705  34.653  87.524  1.00  0.00      chA   
ATOM   1914 HG13 ILE c 211     -10.816  33.186  87.493  1.00  0.00      chA   
ATOM   1915  CD1 ILE c 211     -11.599  34.836  86.468  1.00  0.00      chA   
ATOM   1916 HD11 ILE c 211     -12.556  34.325  86.565  1.00  0.00      chA   
ATOM   1917 HD12 ILE c 211     -11.771  35.892  86.670  1.00  0.00      chA   
ATOM   1918 HD13 ILE c 211     -11.175  34.685  85.475  1.00  0.00      chA   
ATOM   1919  C   ILE c 211     -10.247  32.297  89.925  1.00  0.00      chA   
ATOM   1920  O   ILE c 211      -9.248  31.754  89.469  1.00  0.00      chA   
ATOM   1921  N   ILE c 212     -11.250  31.590  90.399  1.00  0.00      chA   
ATOM   1922  H   ILE c 212     -12.003  32.209  90.665  1.00  0.00      chA   
ATOM   1923  CA  ILE c 212     -11.398  30.095  90.450  1.00  0.00      chA   
ATOM   1924  HA  ILE c 212     -10.441  29.712  90.803  1.00  0.00      chA   
ATOM   1925  CB  ILE c 212     -12.522  29.613  91.348  1.00  0.00      chA   
ATOM   1926  HB  ILE c 212     -12.368  28.535  91.362  1.00  0.00      chA   
ATOM   1927  CG2 ILE c 212     -12.410  30.099  92.747  1.00  0.00      chA   
ATOM   1928 HG21 ILE c 212     -11.369  30.232  93.044  1.00  0.00      chA   
ATOM   1929 HG22 ILE c 212     -12.853  31.092  92.826  1.00  0.00      chA   
ATOM   1930 HG23 ILE c 212     -12.848  29.411  93.470  1.00  0.00      chA   
ATOM   1931  CG1 ILE c 212     -14.061  29.979  90.925  1.00  0.00      chA   
ATOM   1932 HG12 ILE c 212     -14.425  30.841  91.482  1.00  0.00      chA   
ATOM   1933 HG13 ILE c 212     -14.110  30.320  89.890  1.00  0.00      chA   
ATOM   1934  CD1 ILE c 212     -15.083  28.839  91.168  1.00  0.00      chA   
ATOM   1935 HD11 ILE c 212     -15.988  29.388  90.909  1.00  0.00      chA   
ATOM   1936 HD12 ILE c 212     -14.900  27.983  90.519  1.00  0.00      chA   
ATOM   1937 HD13 ILE c 212     -14.945  28.445  92.176  1.00  0.00      chA   
ATOM   1938  C   ILE c 212     -11.523  29.401  89.108  1.00  0.00      chA   
ATOM   1939  O   ILE c 212     -12.053  30.052  88.191  1.00  0.00      chA   
ATOM   1940  N   THR c 213     -11.096  28.117  89.056  1.00  0.00      chA   
ATOM   1941  H   THR c 213     -10.880  27.658  89.929  1.00  0.00      chA   
ATOM   1942  CA  THR c 213     -11.083  27.448  87.832  1.00  0.00      chA   
ATOM   1943  HA  THR c 213     -11.770  27.925  87.133  1.00  0.00      chA   
ATOM   1944  CB  THR c 213      -9.784  27.697  87.084  1.00  0.00      chA   
ATOM   1945  HB  THR c 213      -9.714  26.841  86.414  1.00  0.00      chA   
ATOM   1946  CG2 THR c 213      -9.704  29.042  86.367  1.00  0.00      chA   
ATOM   1947 HG21 THR c 213      -9.612  29.850  87.093  1.00  0.00      chA   
ATOM   1948 HG22 THR c 213      -8.757  29.003  85.829  1.00  0.00      chA   
ATOM   1949 HG23 THR c 213     -10.551  29.148  85.690  1.00  0.00      chA   
ATOM   1950  OG1 THR c 213      -8.695  27.723  87.932  1.00  0.00      chA   
ATOM   1951  HG1 THR c 213      -8.988  27.564  88.833  1.00  0.00      chA   
ATOM   1952  C   THR c 213     -11.428  25.943  87.784  1.00  0.00      chA   
ATOM   1953  O   THR c 213     -12.080  25.475  86.846  1.00  0.00      chA   
ATOM   1954  N   ASP c 214     -10.938  25.149  88.747  1.00  0.00      chA   
ATOM   1955  H   ASP c 214     -10.586  25.661  89.544  1.00  0.00      chA   
ATOM   1956  CA  ASP c 214     -11.258  23.700  88.940  1.00  0.00      chA   
ATOM   1957  HA  ASP c 214     -12.246  23.429  88.567  1.00  0.00      chA   
ATOM   1958  CB  ASP c 214     -10.143  22.867  88.314  1.00  0.00      chA   
ATOM   1959  HB2 ASP c 214      -9.714  23.489  87.528  1.00  0.00      chA   
ATOM   1960  HB3 ASP c 214      -9.364  22.588  89.023  1.00  0.00      chA   
ATOM   1961  CG  ASP c 214     -10.664  21.549  87.710  1.00  0.00      chA   
ATOM   1962  OD1 ASP c 214     -11.710  21.064  88.204  1.00  0.00      chA   
ATOM   1963  OD2 ASP c 214      -9.986  20.926  86.793  1.00  0.00      chA   
ATOM   1964  C   ASP c 214     -11.177  23.432  90.464  1.00  0.00      chA   
ATOM   1965  O   ASP c 214     -10.838  24.297  91.309  1.00  0.00      chA   
ATOM   1966  N   THR c 215     -11.498  22.219  90.831  1.00  0.00      chA   
ATOM   1967  H   THR c 215     -11.753  21.574  90.097  1.00  0.00      chA   
ATOM   1968  CA  THR c 215     -11.425  21.639  92.196  1.00  0.00      chA   
ATOM   1969  HA  THR c 215     -10.606  22.132  92.720  1.00  0.00      chA   
ATOM   1970  CB  THR c 215     -12.763  21.645  92.930  1.00  0.00      chA   
ATOM   1971  HB  THR c 215     -12.681  21.197  93.920  1.00  0.00      chA   
ATOM   1972  CG2 THR c 215     -13.243  23.033  93.336  1.00  0.00      chA   
ATOM   1973 HG21 THR c 215     -13.527  23.694  92.516  1.00  0.00      chA   
ATOM   1974 HG22 THR c 215     -14.167  22.860  93.886  1.00  0.00      chA   
ATOM   1975 HG23 THR c 215     -12.545  23.418  94.080  1.00  0.00      chA   
ATOM   1976  OG1 THR c 215     -13.787  21.044  92.127  1.00  0.00      chA   
ATOM   1977  HG1 THR c 215     -14.594  21.287  92.588  1.00  0.00      chA   
ATOM   1978  C   THR c 215     -11.035  20.179  92.199  1.00  0.00      chA   
ATOM   1979  O   THR c 215     -11.355  19.468  91.242  1.00  0.00      chA   
ATOM   1980  N   ILE c 216     -10.544  19.689  93.300  1.00  0.00      chA   
ATOM   1981  H   ILE c 216     -10.204  20.236  94.077  1.00  0.00      chA   
ATOM   1982  CA  ILE c 216     -10.269  18.259  93.490  1.00  0.00      chA   
ATOM   1983  HA  ILE c 216     -10.699  17.581  92.752  1.00  0.00      chA   
ATOM   1984  CB  ILE c 216      -8.776  17.995  93.273  1.00  0.00      chA   
ATOM   1985  HB  ILE c 216      -8.333  18.644  94.028  1.00  0.00      chA   
ATOM   1986  CG2 ILE c 216      -8.259  16.586  93.570  1.00  0.00      chA   
ATOM   1987 HG21 ILE c 216      -7.170  16.576  93.609  1.00  0.00      chA   
ATOM   1988 HG22 ILE c 216      -8.625  16.320  94.562  1.00  0.00      chA   
ATOM   1989 HG23 ILE c 216      -8.734  15.887  92.880  1.00  0.00      chA   
ATOM   1990  CG1 ILE c 216      -8.094  18.399  91.976  1.00  0.00      chA   
ATOM   1991 HG12 ILE c 216      -8.024  19.485  91.923  1.00  0.00      chA   
ATOM   1992 HG13 ILE c 216      -7.044  18.109  92.026  1.00  0.00      chA   
ATOM   1993  CD1 ILE c 216      -8.606  17.902  90.618  1.00  0.00      chA   
ATOM   1994 HD11 ILE c 216      -7.848  17.478  89.959  1.00  0.00      chA   
ATOM   1995 HD12 ILE c 216      -9.323  17.083  90.679  1.00  0.00      chA   
ATOM   1996 HD13 ILE c 216      -9.120  18.718  90.110  1.00  0.00      chA   
ATOM   1997  C   ILE c 216     -10.796  17.832  94.808  1.00  0.00      chA   
ATOM   1998  O   ILE c 216     -10.447  18.373  95.851  1.00  0.00      chA   
ATOM   1999  N   LYS c 217     -11.685  16.794  94.781  1.00  0.00      chA   
ATOM   2000  H   LYS c 217     -11.975  16.447  93.878  1.00  0.00      chA   
ATOM   2001  CA  LYS c 217     -12.265  16.309  96.035  1.00  0.00      chA   
ATOM   2002  HA  LYS c 217     -12.304  17.088  96.796  1.00  0.00      chA   
ATOM   2003  CB  LYS c 217     -13.748  15.804  95.916  1.00  0.00      chA   
ATOM   2004  HB2 LYS c 217     -14.167  15.618  96.905  1.00  0.00      chA   
ATOM   2005  HB3 LYS c 217     -14.317  16.584  95.410  1.00  0.00      chA   
ATOM   2006  CG  LYS c 217     -13.882  14.498  94.986  1.00  0.00      chA   
ATOM   2007  HG2 LYS c 217     -13.795  15.031  94.039  1.00  0.00      chA   
ATOM   2008  HG3 LYS c 217     -13.050  13.827  95.199  1.00  0.00      chA   
ATOM   2009  CD  LYS c 217     -15.309  13.761  95.013  1.00  0.00      chA   
ATOM   2010  HD2 LYS c 217     -16.051  14.458  94.626  1.00  0.00      chA   
ATOM   2011  HD3 LYS c 217     -15.190  12.967  94.277  1.00  0.00      chA   
ATOM   2012  CE  LYS c 217     -15.620  13.193  96.418  1.00  0.00      chA   
ATOM   2013  HE2 LYS c 217     -14.766  12.542  96.604  1.00  0.00      chA   
ATOM   2014  HE3 LYS c 217     -15.529  13.994  97.152  1.00  0.00      chA   
ATOM   2015  NZ  LYS c 217     -16.927  12.526  96.531  1.00  0.00      chA   
ATOM   2016  HZ1 LYS c 217     -17.690  13.010  96.077  1.00  0.00      chA   
ATOM   2017  HZ2 LYS c 217     -16.995  11.572  96.206  1.00  0.00      chA   
ATOM   2018  HZ3 LYS c 217     -17.010  12.466  97.536  1.00  0.00      chA   
ATOM   2019  C   LYS c 217     -11.349  15.283  96.720  1.00  0.00      chA   
ATOM   2020  O   LYS c 217     -10.436  14.695  96.135  1.00  0.00      chA   
ATOM   2021  N   SER c 218     -11.731  14.855  97.935  1.00  0.00      chA   
ATOM   2022  H   SER c 218     -12.635  15.191  98.231  1.00  0.00      chA   
ATOM   2023  CA  SER c 218     -11.122  13.786  98.778  1.00  0.00      chA   
ATOM   2024  HA  SER c 218     -10.047  13.961  98.730  1.00  0.00      chA   
ATOM   2025  CB  SER c 218     -11.663  13.773 100.181  1.00  0.00      chA   
ATOM   2026  HB2 SER c 218     -12.727  13.963 100.034  1.00  0.00      chA   
ATOM   2027  HB3 SER c 218     -11.552  12.840 100.733  1.00  0.00      chA   
ATOM   2028  OG  SER c 218     -11.107  14.937 100.832  1.00  0.00      chA   
ATOM   2029  HG  SER c 218     -10.960  15.623 100.177  1.00  0.00      chA   
ATOM   2030  C   SER c 218     -11.303  12.369  98.063  1.00  0.00      chA   
ATOM   2031  O   SER c 218     -12.036  12.170  97.107  1.00  0.00      chA   
ATOM   2032  N   TRP c 219     -10.600  11.337  98.512  1.00  0.00      chA   
ATOM   2033  H   TRP c 219     -10.032  11.576  99.312  1.00  0.00      chA   
ATOM   2034  CA  TRP c 219     -10.701   9.995  97.952  1.00  0.00      chA   
ATOM   2035  HA  TRP c 219     -11.707   9.813  97.573  1.00  0.00      chA   
ATOM   2036  CB  TRP c 219      -9.724   9.906  96.720  1.00  0.00      chA   
ATOM   2037  HB2 TRP c 219      -9.869   8.965  96.190  1.00  0.00      chA   
ATOM   2038  HB3 TRP c 219      -9.909  10.713  96.010  1.00  0.00      chA   
ATOM   2039  CG  TRP c 219      -8.235   9.998  97.068  1.00  0.00      chA   
ATOM   2040  CD1 TRP c 219      -7.411   8.937  97.338  1.00  0.00      chA   
ATOM   2041  HD1 TRP c 219      -7.821   7.939  97.353  1.00  0.00      chA   
ATOM   2042  NE1 TRP c 219      -6.131   9.378  97.184  1.00  0.00      chA   
ATOM   2043  HE1 TRP c 219      -5.401   8.684  97.120  1.00  0.00      chA   
ATOM   2044  CE2 TRP c 219      -6.056  10.786  97.074  1.00  0.00      chA   
ATOM   2045  CZ2 TRP c 219      -4.963  11.643  96.905  1.00  0.00      chA   
ATOM   2046  HZ2 TRP c 219      -4.012  11.179  97.124  1.00  0.00      chA   
ATOM   2047  CH2 TRP c 219      -5.167  12.917  96.446  1.00  0.00      chA   
ATOM   2048  HH2 TRP c 219      -4.332  13.528  96.135  1.00  0.00      chA   
ATOM   2049  CZ3 TRP c 219      -6.485  13.393  96.360  1.00  0.00      chA   
ATOM   2050  HZ3 TRP c 219      -6.598  14.398  95.980  1.00  0.00      chA   
ATOM   2051  CE3 TRP c 219      -7.588  12.543  96.491  1.00  0.00      chA   
ATOM   2052  HE3 TRP c 219      -8.612  12.860  96.358  1.00  0.00      chA   
ATOM   2053  CD2 TRP c 219      -7.383  11.163  96.812  1.00  0.00      chA   
ATOM   2054  C   TRP c 219     -10.346   8.856  98.959  1.00  0.00      chA   
ATOM   2055  O   TRP c 219     -10.942   7.774  98.810  1.00  0.00      chA   
ATOM   2056  N   ARG c 220      -9.474   9.111  99.927  1.00  0.00      chA   
ATOM   2057  H   ARG c 220      -9.047  10.018 100.052  1.00  0.00      chA   
ATOM   2058  CA  ARG c 220      -9.113   8.190 101.047  1.00  0.00      chA   
ATOM   2059  HA  ARG c 220      -9.722   7.289 100.971  1.00  0.00      chA   
ATOM   2060  CB  ARG c 220      -7.633   7.755 100.896  1.00  0.00      chA   
ATOM   2061  HB2 ARG c 220      -7.336   7.718  99.848  1.00  0.00      chA   
ATOM   2062  HB3 ARG c 220      -7.092   8.552 101.404  1.00  0.00      chA   
ATOM   2063  CG  ARG c 220      -7.206   6.329 101.428  1.00  0.00      chA   
ATOM   2064  HG2 ARG c 220      -6.191   6.139 101.082  1.00  0.00      chA   
ATOM   2065  HG3 ARG c 220      -7.256   6.351 102.517  1.00  0.00      chA   
ATOM   2066  CD  ARG c 220      -8.114   5.263 100.741  1.00  0.00      chA   
ATOM   2067  HD2 ARG c 220      -7.728   4.316 101.118  1.00  0.00      chA   
ATOM   2068  HD3 ARG c 220      -9.122   5.282 101.153  1.00  0.00      chA   
ATOM   2069  NE  ARG c 220      -8.009   5.293  99.260  1.00  0.00      chA   
ATOM   2070  HE  ARG c 220      -8.672   5.829  98.720  1.00  0.00      chA   
ATOM   2071  CZ  ARG c 220      -7.221   4.581  98.509  1.00  0.00      chA   
ATOM   2072  NH1 ARG c 220      -6.304   3.779  98.930  1.00  0.00      chA   
ATOM   2073 HH11 ARG c 220      -6.051   3.668  99.900  1.00  0.00      chA   
ATOM   2074 HH12 ARG c 220      -5.651   3.527  98.203  1.00  0.00      chA   
ATOM   2075  NH2 ARG c 220      -7.278   4.617  97.180  1.00  0.00      chA   
ATOM   2076 HH21 ARG c 220      -8.102   5.035  96.772  1.00  0.00      chA   
ATOM   2077 HH22 ARG c 220      -6.577   4.102  96.667  1.00  0.00      chA   
ATOM   2078  C   ARG c 220      -9.426   8.832 102.423  1.00  0.00      chA   
ATOM   2079  O   ARG c 220      -9.139   8.174 103.436  1.00  0.00      chA   
ATOM   2080  N   ASN c 221     -10.096   9.976 102.388  1.00  0.00      chA   
ATOM   2081  H   ASN c 221     -10.059  10.456 101.501  1.00  0.00      chA   
ATOM   2082  CA  ASN c 221     -11.035  10.568 103.362  1.00  0.00      chA   
ATOM   2083  HA  ASN c 221     -11.399  11.534 103.012  1.00  0.00      chA   
ATOM   2084  CB  ASN c 221     -12.230   9.559 103.377  1.00  0.00      chA   
ATOM   2085  HB2 ASN c 221     -12.002   8.527 103.641  1.00  0.00      chA   
ATOM   2086  HB3 ASN c 221     -12.927   9.906 104.141  1.00  0.00      chA   
ATOM   2087  CG  ASN c 221     -12.885   9.424 102.008  1.00  0.00      chA   
ATOM   2088  OD1 ASN c 221     -13.157  10.327 101.286  1.00  0.00      chA   
ATOM   2089  ND2 ASN c 221     -12.976   8.305 101.403  1.00  0.00      chA   
ATOM   2090 HD21 ASN c 221     -13.270   8.341 100.438  1.00  0.00      chA   
ATOM   2091 HD22 ASN c 221     -12.821   7.505 101.998  1.00  0.00      chA   
ATOM   2092  C   ASN c 221     -10.421  10.884 104.749  1.00  0.00      chA   
ATOM   2093  O   ASN c 221     -10.968  10.497 105.801  1.00  0.00      chA   
ATOM   2094  N   ASN c 222      -9.163  11.387 104.808  1.00  0.00      chA   
ATOM   2095  H   ASN c 222      -8.716  11.581 103.923  1.00  0.00      chA   
ATOM   2096  CA  ASN c 222      -8.508  11.886 106.071  1.00  0.00      chA   
ATOM   2097  HA  ASN c 222      -9.220  12.359 106.747  1.00  0.00      chA   
ATOM   2098  CB  ASN c 222      -7.949  10.606 106.737  1.00  0.00      chA   
ATOM   2099  HB2 ASN c 222      -8.765   9.966 107.072  1.00  0.00      chA   
ATOM   2100  HB3 ASN c 222      -7.364  10.046 106.008  1.00  0.00      chA   
ATOM   2101  CG  ASN c 222      -7.122  10.899 107.929  1.00  0.00      chA   
ATOM   2102  OD1 ASN c 222      -7.625  11.034 109.076  1.00  0.00      chA   
ATOM   2103  ND2 ASN c 222      -5.832  10.994 107.805  1.00  0.00      chA   
ATOM   2104 HD21 ASN c 222      -5.311  11.240 108.634  1.00  0.00      chA   
ATOM   2105 HD22 ASN c 222      -5.453  11.053 106.871  1.00  0.00      chA   
ATOM   2106  C   ASN c 222      -7.434  12.902 105.601  1.00  0.00      chA   
ATOM   2107  O   ASN c 222      -6.311  12.472 105.339  1.00  0.00      chA   
ATOM   2108  N   ILE c 223      -7.665  14.170 105.882  1.00  0.00      chA   
ATOM   2109  H   ILE c 223      -8.614  14.403 106.138  1.00  0.00      chA   
ATOM   2110  CA  ILE c 223      -6.651  15.211 105.681  1.00  0.00      chA   
ATOM   2111  HA  ILE c 223      -7.135  16.187 105.694  1.00  0.00      chA   
ATOM   2112  CB  ILE c 223      -5.550  15.194 106.757  1.00  0.00      chA   
ATOM   2113  HB  ILE c 223      -4.907  14.325 106.615  1.00  0.00      chA   
ATOM   2114  CG2 ILE c 223      -4.800  16.561 106.846  1.00  0.00      chA   
ATOM   2115 HG21 ILE c 223      -5.579  17.176 107.294  1.00  0.00      chA   
ATOM   2116 HG22 ILE c 223      -3.837  16.582 107.357  1.00  0.00      chA   
ATOM   2117 HG23 ILE c 223      -4.580  16.905 105.835  1.00  0.00      chA   
ATOM   2118  CG1 ILE c 223      -6.173  15.031 108.159  1.00  0.00      chA   
ATOM   2119 HG12 ILE c 223      -6.823  15.871 108.403  1.00  0.00      chA   
ATOM   2120 HG13 ILE c 223      -6.801  14.142 108.096  1.00  0.00      chA   
ATOM   2121  CD1 ILE c 223      -5.135  14.843 109.268  1.00  0.00      chA   
ATOM   2122 HD11 ILE c 223      -4.543  13.961 109.026  1.00  0.00      chA   
ATOM   2123 HD12 ILE c 223      -4.481  15.714 109.310  1.00  0.00      chA   
ATOM   2124 HD13 ILE c 223      -5.656  14.594 110.192  1.00  0.00      chA   
ATOM   2125  C   ILE c 223      -6.054  15.168 104.226  1.00  0.00      chA   
ATOM   2126  O   ILE c 223      -4.897  14.770 104.045  1.00  0.00      chA   
ATOM   2127  N   LEU c 224      -6.900  15.465 103.258  1.00  0.00      chA   
ATOM   2128  H   LEU c 224      -7.874  15.629 103.462  1.00  0.00      chA   
ATOM   2129  CA  LEU c 224      -6.474  15.716 101.901  1.00  0.00      chA   
ATOM   2130  HA  LEU c 224      -5.925  14.848 101.534  1.00  0.00      chA   
ATOM   2131  CB  LEU c 224      -7.702  15.985 100.965  1.00  0.00      chA   
ATOM   2132  HB2 LEU c 224      -8.320  15.089 100.891  1.00  0.00      chA   
ATOM   2133  HB3 LEU c 224      -8.287  16.665 101.586  1.00  0.00      chA   
ATOM   2134  CG  LEU c 224      -7.471  16.484  99.562  1.00  0.00      chA   
ATOM   2135  HG  LEU c 224      -6.850  17.378  99.615  1.00  0.00      chA   
ATOM   2136  CD1 LEU c 224      -6.718  15.486  98.731  1.00  0.00      chA   
ATOM   2137 HD11 LEU c 224      -7.344  14.597  98.658  1.00  0.00      chA   
ATOM   2138 HD12 LEU c 224      -6.296  15.921  97.825  1.00  0.00      chA   
ATOM   2139 HD13 LEU c 224      -5.849  15.244  99.344  1.00  0.00      chA   
ATOM   2140  CD2 LEU c 224      -8.725  16.953  98.905  1.00  0.00      chA   
ATOM   2141 HD21 LEU c 224      -8.476  17.746  98.200  1.00  0.00      chA   
ATOM   2142 HD22 LEU c 224      -9.150  16.124  98.340  1.00  0.00      chA   
ATOM   2143 HD23 LEU c 224      -9.473  17.299  99.619  1.00  0.00      chA   
ATOM   2144  C   LEU c 224      -5.483  16.936 102.021  1.00  0.00      chA   
ATOM   2145  O   LEU c 224      -5.768  17.915 102.726  1.00  0.00      chA   
ATOM   2146  N   ARG c 225      -4.278  16.758 101.393  1.00  0.00      chA   
ATOM   2147  H   ARG c 225      -4.195  15.848 100.963  1.00  0.00      chA   
ATOM   2148  CA  ARG c 225      -3.154  17.705 101.480  1.00  0.00      chA   
ATOM   2149  HA  ARG c 225      -3.536  18.723 101.549  1.00  0.00      chA   
ATOM   2150  CB  ARG c 225      -2.475  17.470 102.843  1.00  0.00      chA   
ATOM   2151  HB2 ARG c 225      -1.534  18.021 102.824  1.00  0.00      chA   
ATOM   2152  HB3 ARG c 225      -3.133  17.809 103.644  1.00  0.00      chA   
ATOM   2153  CG  ARG c 225      -1.986  16.024 103.122  1.00  0.00      chA   
ATOM   2154  HG2 ARG c 225      -2.760  15.287 102.901  1.00  0.00      chA   
ATOM   2155  HG3 ARG c 225      -1.138  15.810 102.472  1.00  0.00      chA   
ATOM   2156  CD  ARG c 225      -1.488  15.793 104.559  1.00  0.00      chA   
ATOM   2157  HD2 ARG c 225      -0.657  16.477 104.723  1.00  0.00      chA   
ATOM   2158  HD3 ARG c 225      -2.291  15.962 105.277  1.00  0.00      chA   
ATOM   2159  NE  ARG c 225      -0.907  14.489 104.843  1.00  0.00      chA   
ATOM   2160  HE  ARG c 225       0.036  14.461 105.204  1.00  0.00      chA   
ATOM   2161  CZ  ARG c 225      -1.477  13.265 104.982  1.00  0.00      chA   
ATOM   2162  NH1 ARG c 225      -0.706  12.201 105.254  1.00  0.00      chA   
ATOM   2163 HH11 ARG c 225       0.291  12.344 105.175  1.00  0.00      chA   
ATOM   2164 HH12 ARG c 225      -1.070  11.266 105.360  1.00  0.00      chA   
ATOM   2165  NH2 ARG c 225      -2.755  13.044 104.959  1.00  0.00      chA   
ATOM   2166 HH21 ARG c 225      -3.301  13.821 104.618  1.00  0.00      chA   
ATOM   2167 HH22 ARG c 225      -3.188  12.157 105.179  1.00  0.00      chA   
ATOM   2168  C   ARG c 225      -2.116  17.732 100.269  1.00  0.00      chA   
ATOM   2169  O   ARG c 225      -2.324  16.940  99.354  1.00  0.00      chA   
ATOM   2170  N   THR c 226      -1.231  18.673 100.317  1.00  0.00      chA   
ATOM   2171  H   THR c 226      -1.198  19.200 101.179  1.00  0.00      chA   
ATOM   2172  CA  THR c 226      -0.443  19.051  99.080  1.00  0.00      chA   
ATOM   2173  HA  THR c 226      -0.397  18.139  98.484  1.00  0.00      chA   
ATOM   2174  CB  THR c 226      -1.270  20.136  98.294  1.00  0.00      chA   
ATOM   2175  HB  THR c 226      -2.194  19.617  98.043  1.00  0.00      chA   
ATOM   2176  CG2 THR c 226      -1.408  21.454  99.035  1.00  0.00      chA   
ATOM   2177 HG21 THR c 226      -2.173  21.375  99.808  1.00  0.00      chA   
ATOM   2178 HG22 THR c 226      -0.550  21.803  99.611  1.00  0.00      chA   
ATOM   2179 HG23 THR c 226      -1.603  22.310  98.389  1.00  0.00      chA   
ATOM   2180  OG1 THR c 226      -0.668  20.583  97.081  1.00  0.00      chA   
ATOM   2181  HG1 THR c 226      -0.711  19.890  96.419  1.00  0.00      chA   
ATOM   2182  C   THR c 226       0.956  19.430  99.384  1.00  0.00      chA   
ATOM   2183  O   THR c 226       1.498  19.014 100.358  1.00  0.00      chA   
ATOM   2184  N   GLN c 227       1.618  20.260  98.598  1.00  0.00      chA   
ATOM   2185  H   GLN c 227       1.122  20.891  97.985  1.00  0.00      chA   
ATOM   2186  CA  GLN c 227       3.111  20.337  98.450  1.00  0.00      chA   
ATOM   2187  HA  GLN c 227       3.606  19.372  98.549  1.00  0.00      chA   
ATOM   2188  CB  GLN c 227       3.527  20.985  97.126  1.00  0.00      chA   
ATOM   2189  HB2 GLN c 227       2.924  21.880  96.977  1.00  0.00      chA   
ATOM   2190  HB3 GLN c 227       4.583  21.255  97.137  1.00  0.00      chA   
ATOM   2191  CG  GLN c 227       3.423  19.900  96.070  1.00  0.00      chA   
ATOM   2192  HG2 GLN c 227       3.981  19.027  96.407  1.00  0.00      chA   
ATOM   2193  HG3 GLN c 227       2.388  19.570  95.985  1.00  0.00      chA   
ATOM   2194  CD  GLN c 227       3.877  20.445  94.670  1.00  0.00      chA   
ATOM   2195  OE1 GLN c 227       3.091  20.691  93.769  1.00  0.00      chA   
ATOM   2196  NE2 GLN c 227       5.157  20.756  94.553  1.00  0.00      chA   
ATOM   2197 HE21 GLN c 227       5.517  21.259  93.755  1.00  0.00      chA   
ATOM   2198 HE22 GLN c 227       5.658  20.871  95.422  1.00  0.00      chA   
ATOM   2199  C   GLN c 227       3.631  21.230  99.576  1.00  0.00      chA   
ATOM   2200  O   GLN c 227       4.814  21.149  99.884  1.00  0.00      chA   
ATOM   2201  N   GLU c 228       2.948  22.323  99.984  1.00  0.00      chA   
ATOM   2202  H   GLU c 228       1.952  22.297  99.814  1.00  0.00      chA   
ATOM   2203  CA  GLU c 228       3.388  23.508 100.817  1.00  0.00      chA   
ATOM   2204  HA  GLU c 228       2.630  24.291 100.788  1.00  0.00      chA   
ATOM   2205  CB  GLU c 228       3.629  23.059 102.287  1.00  0.00      chA   
ATOM   2206  HB2 GLU c 228       4.610  22.583 102.290  1.00  0.00      chA   
ATOM   2207  HB3 GLU c 228       3.615  23.966 102.892  1.00  0.00      chA   
ATOM   2208  CG  GLU c 228       2.605  22.163 102.959  1.00  0.00      chA   
ATOM   2209  HG2 GLU c 228       2.765  21.158 102.569  1.00  0.00      chA   
ATOM   2210  HG3 GLU c 228       2.760  22.316 104.027  1.00  0.00      chA   
ATOM   2211  CD  GLU c 228       1.186  22.628 102.687  1.00  0.00      chA   
ATOM   2212  OE1 GLU c 228       0.410  21.858 102.065  1.00  0.00      chA   
ATOM   2213  OE2 GLU c 228       0.788  23.643 103.243  1.00  0.00      chA   
ATOM   2214  C   GLU c 228       4.653  24.145 100.226  1.00  0.00      chA   
ATOM   2215  O   GLU c 228       5.595  24.564 100.964  1.00  0.00      chA   
ATOM   2216  N   SER c 229       4.812  24.185  98.881  1.00  0.00      chA   
ATOM   2217  H   SER c 229       4.148  23.670  98.319  1.00  0.00      chA   
ATOM   2218  CA  SER c 229       5.939  24.706  98.109  1.00  0.00      chA   
ATOM   2219  HA  SER c 229       6.160  25.736  98.387  1.00  0.00      chA   
ATOM   2220  CB  SER c 229       7.137  23.804  98.118  1.00  0.00      chA   
ATOM   2221  HB2 SER c 229       7.967  24.237  97.559  1.00  0.00      chA   
ATOM   2222  HB3 SER c 229       7.472  23.757  99.154  1.00  0.00      chA   
ATOM   2223  OG  SER c 229       6.894  22.542  97.706  1.00  0.00      chA   
ATOM   2224  HG  SER c 229       6.973  22.464  96.752  1.00  0.00      chA   
ATOM   2225  C   SER c 229       5.437  24.929  96.610  1.00  0.00      chA   
ATOM   2226  O   SER c 229       4.279  24.775  96.339  1.00  0.00      chA   
ATOM   2227  N   GLU c 230       6.297  25.168  95.601  1.00  0.00      chA   
ATOM   2228  H   GLU c 230       7.295  25.144  95.750  1.00  0.00      chA   
ATOM   2229  CA  GLU c 230       5.930  25.424  94.241  1.00  0.00      chA   
ATOM   2230  HA  GLU c 230       5.167  26.201  94.309  1.00  0.00      chA   
ATOM   2231  CB  GLU c 230       7.123  26.117  93.603  1.00  0.00      chA   
ATOM   2232  HB2 GLU c 230       7.411  26.976  94.210  1.00  0.00      chA   
ATOM   2233  HB3 GLU c 230       8.057  25.562  93.519  1.00  0.00      chA   
ATOM   2234  CG  GLU c 230       6.844  26.679  92.193  1.00  0.00      chA   
ATOM   2235  HG2 GLU c 230       6.669  25.971  91.384  1.00  0.00      chA   
ATOM   2236  HG3 GLU c 230       5.958  27.289  92.370  1.00  0.00      chA   
ATOM   2237  CD  GLU c 230       7.988  27.672  91.873  1.00  0.00      chA   
ATOM   2238  OE1 GLU c 230       7.649  28.829  91.502  1.00  0.00      chA   
ATOM   2239  OE2 GLU c 230       9.146  27.202  91.601  1.00  0.00      chA   
ATOM   2240  C   GLU c 230       5.358  24.281  93.363  1.00  0.00      chA   
ATOM   2241  O   GLU c 230       5.897  23.174  93.309  1.00  0.00      chA   
ATOM   2242  N   CYX c 231       4.303  24.622  92.641  1.00  0.00      chA   
ATOM   2243  H   CYX c 231       4.010  25.581  92.774  1.00  0.00      chA   
ATOM   2244  CA  CYX c 231       3.697  23.786  91.539  1.00  0.00      chA   
ATOM   2245  HA  CYX c 231       3.706  22.737  91.834  1.00  0.00      chA   
ATOM   2246  CB  CYX c 231       2.195  24.082  91.414  1.00  0.00      chA   
ATOM   2247  HB2 CYX c 231       1.734  23.802  90.467  1.00  0.00      chA   
ATOM   2248  HB3 CYX c 231       1.699  23.327  92.024  1.00  0.00      chA   
ATOM   2249  SG  CYX c 231       1.484  25.696  91.763  1.00  0.00      chA   
ATOM   2250  C   CYX c 231       4.456  24.027  90.181  1.00  0.00      chA   
ATOM   2251  O   CYX c 231       3.980  24.765  89.314  1.00  0.00      chA   
ATOM   2252  N   ALA c 232       5.656  23.428  90.188  1.00  0.00      chA   
ATOM   2253  H   ALA c 232       5.905  22.847  90.975  1.00  0.00      chA   
ATOM   2254  CA  ALA c 232       6.536  23.352  88.965  1.00  0.00      chA   
ATOM   2255  HA  ALA c 232       7.119  24.264  89.091  1.00  0.00      chA   
ATOM   2256  CB  ALA c 232       7.485  22.216  89.080  1.00  0.00      chA   
ATOM   2257  HB1 ALA c 232       6.994  21.247  89.168  1.00  0.00      chA   
ATOM   2258  HB2 ALA c 232       8.167  22.227  88.231  1.00  0.00      chA   
ATOM   2259  HB3 ALA c 232       8.040  22.232  90.019  1.00  0.00      chA   
ATOM   2260  C   ALA c 232       5.950  23.454  87.503  1.00  0.00      chA   
ATOM   2261  O   ALA c 232       4.909  22.898  87.125  1.00  0.00      chA   
ATOM   2262  N   CYX c 233       6.669  24.165  86.648  1.00  0.00      chA   
ATOM   2263  H   CYX c 233       7.565  24.545  86.916  1.00  0.00      chA   
ATOM   2264  CA  CYX c 233       6.194  24.569  85.254  1.00  0.00      chA   
ATOM   2265  HA  CYX c 233       5.345  23.945  84.974  1.00  0.00      chA   
ATOM   2266  CB  CYX c 233       5.646  26.121  85.392  1.00  0.00      chA   
ATOM   2267  HB2 CYX c 233       6.594  26.531  85.741  1.00  0.00      chA   
ATOM   2268  HB3 CYX c 233       5.468  26.643  84.452  1.00  0.00      chA   
ATOM   2269  SG  CYX c 233       4.442  26.486  86.692  1.00  0.00      chA   
ATOM   2270  C   CYX c 233       7.202  24.477  84.178  1.00  0.00      chA   
ATOM   2271  O   CYX c 233       8.423  24.522  84.336  1.00  0.00      chA   
ATOM   2272  N   VAL c 234       6.602  24.351  82.961  1.00  0.00      chA   
ATOM   2273  H   VAL c 234       5.605  24.198  82.910  1.00  0.00      chA   
ATOM   2274  CA  VAL c 234       7.433  24.322  81.751  1.00  0.00      chA   
ATOM   2275  HA  VAL c 234       8.117  25.169  81.796  1.00  0.00      chA   
ATOM   2276  CB  VAL c 234       8.232  22.986  81.704  1.00  0.00      chA   
ATOM   2277  HB  VAL c 234       8.699  22.825  82.676  1.00  0.00      chA   
ATOM   2278  CG1 VAL c 234       7.479  21.654  81.413  1.00  0.00      chA   
ATOM   2279 HG11 VAL c 234       6.589  21.714  82.040  1.00  0.00      chA   
ATOM   2280 HG12 VAL c 234       7.188  21.739  80.366  1.00  0.00      chA   
ATOM   2281 HG13 VAL c 234       7.992  20.709  81.591  1.00  0.00      chA   
ATOM   2282  CG2 VAL c 234       9.483  23.071  80.773  1.00  0.00      chA   
ATOM   2283 HG21 VAL c 234      10.082  22.189  81.002  1.00  0.00      chA   
ATOM   2284 HG22 VAL c 234       9.259  23.214  79.715  1.00  0.00      chA   
ATOM   2285 HG23 VAL c 234      10.051  23.933  81.122  1.00  0.00      chA   
ATOM   2286  C   VAL c 234       6.657  24.465  80.454  1.00  0.00      chA   
ATOM   2287  O   VAL c 234       5.656  23.779  80.265  1.00  0.00      chA   
ATOM   2288  N   ASN c 235       7.002  25.427  79.633  1.00  0.00      chA   
ATOM   2289  H   ASN c 235       7.705  26.103  79.893  1.00  0.00      chA   
ATOM   2290  CA  ASN c 235       6.438  25.558  78.282  1.00  0.00      chA   
ATOM   2291  HA  ASN c 235       6.812  26.514  77.915  1.00  0.00      chA   
ATOM   2292  CB  ASN c 235       7.219  24.540  77.459  1.00  0.00      chA   
ATOM   2293  HB2 ASN c 235       8.260  24.790  77.661  1.00  0.00      chA   
ATOM   2294  HB3 ASN c 235       6.822  23.600  77.843  1.00  0.00      chA   
ATOM   2295  CG  ASN c 235       7.032  24.447  75.951  1.00  0.00      chA   
ATOM   2296  OD1 ASN c 235       6.671  25.401  75.320  1.00  0.00      chA   
ATOM   2297  ND2 ASN c 235       7.164  23.254  75.402  1.00  0.00      chA   
ATOM   2298 HD21 ASN c 235       6.929  23.035  74.444  1.00  0.00      chA   
ATOM   2299 HD22 ASN c 235       7.557  22.515  75.967  1.00  0.00      chA   
ATOM   2300  C   ASN c 235       4.860  25.705  78.119  1.00  0.00      chA   
ATOM   2301  O   ASN c 235       4.354  25.350  77.049  1.00  0.00      chA   
ATOM   2302  N   GLY c 236       4.149  26.190  79.151  1.00  0.00      chA   
ATOM   2303  H   GLY c 236       4.633  26.405  80.011  1.00  0.00      chA   
ATOM   2304  CA  GLY c 236       2.843  26.777  79.051  1.00  0.00      chA   
ATOM   2305  HA2 GLY c 236       2.771  27.707  79.615  1.00  0.00      chA   
ATOM   2306  HA3 GLY c 236       2.485  27.046  78.058  1.00  0.00      chA   
ATOM   2307  C   GLY c 236       1.853  25.846  79.819  1.00  0.00      chA   
ATOM   2308  O   GLY c 236       0.670  25.805  79.525  1.00  0.00      chA   
ATOM   2309  N   SER c 237       2.375  25.048  80.765  1.00  0.00      chA   
ATOM   2310  H   SER c 237       3.354  25.219  80.947  1.00  0.00      chA   
ATOM   2311  CA  SER c 237       1.563  24.268  81.691  1.00  0.00      chA   
ATOM   2312  HA  SER c 237       0.700  24.870  81.978  1.00  0.00      chA   
ATOM   2313  CB  SER c 237       1.263  22.876  81.208  1.00  0.00      chA   
ATOM   2314  HB2 SER c 237       2.145  22.276  80.985  1.00  0.00      chA   
ATOM   2315  HB3 SER c 237       0.704  22.452  82.042  1.00  0.00      chA   
ATOM   2316  OG  SER c 237       0.546  22.922  80.039  1.00  0.00      chA   
ATOM   2317  HG  SER c 237       0.382  23.858  79.904  1.00  0.00      chA   
ATOM   2318  C   SER c 237       2.334  24.098  83.091  1.00  0.00      chA   
ATOM   2319  O   SER c 237       3.498  24.441  83.160  1.00  0.00      chA   
ATOM   2320  N   CYX c 238       1.602  23.691  84.152  1.00  0.00      chA   
ATOM   2321  H   CYX c 238       0.664  23.376  83.943  1.00  0.00      chA   
ATOM   2322  CA  CYX c 238       2.156  23.648  85.506  1.00  0.00      chA   
ATOM   2323  HA  CYX c 238       3.245  23.673  85.558  1.00  0.00      chA   
ATOM   2324  CB  CYX c 238       1.849  24.856  86.397  1.00  0.00      chA   
ATOM   2325  HB2 CYX c 238       0.779  25.057  86.386  1.00  0.00      chA   
ATOM   2326  HB3 CYX c 238       2.145  24.680  87.431  1.00  0.00      chA   
ATOM   2327  SG  CYX c 238       2.557  26.491  85.881  1.00  0.00      chA   
ATOM   2328  C   CYX c 238       1.615  22.484  86.240  1.00  0.00      chA   
ATOM   2329  O   CYX c 238       0.527  22.041  85.941  1.00  0.00      chA   
ATOM   2330  N   PHE c 239       2.348  21.977  87.231  1.00  0.00      chA   
ATOM   2331  H   PHE c 239       3.253  22.402  87.364  1.00  0.00      chA   
ATOM   2332  CA  PHE c 239       2.170  20.594  87.728  1.00  0.00      chA   
ATOM   2333  HA  PHE c 239       1.252  20.064  87.477  1.00  0.00      chA   
ATOM   2334  CB  PHE c 239       3.332  19.750  87.220  1.00  0.00      chA   
ATOM   2335  HB2 PHE c 239       4.140  20.365  87.617  1.00  0.00      chA   
ATOM   2336  HB3 PHE c 239       3.217  18.795  87.732  1.00  0.00      chA   
ATOM   2337  CG  PHE c 239       3.428  19.581  85.689  1.00  0.00      chA   
ATOM   2338  CD1 PHE c 239       4.173  20.407  84.886  1.00  0.00      chA   
ATOM   2339  HD1 PHE c 239       4.731  21.236  85.297  1.00  0.00      chA   
ATOM   2340  CE1 PHE c 239       4.054  20.203  83.491  1.00  0.00      chA   
ATOM   2341  HE1 PHE c 239       4.598  20.855  82.824  1.00  0.00      chA   
ATOM   2342  CZ  PHE c 239       3.463  19.056  82.939  1.00  0.00      chA   
ATOM   2343  HZ  PHE c 239       3.550  18.862  81.879  1.00  0.00      chA   
ATOM   2344  CE2 PHE c 239       2.776  18.216  83.776  1.00  0.00      chA   
ATOM   2345  HE2 PHE c 239       2.232  17.422  83.287  1.00  0.00      chA   
ATOM   2346  CD2 PHE c 239       2.717  18.451  85.148  1.00  0.00      chA   
ATOM   2347  HD2 PHE c 239       2.121  17.847  85.817  1.00  0.00      chA   
ATOM   2348  C   PHE c 239       2.048  20.462  89.269  1.00  0.00      chA   
ATOM   2349  O   PHE c 239       2.685  21.313  89.959  1.00  0.00      chA   
ATOM   2350  N   THR c 240       1.348  19.479  89.820  1.00  0.00      chA   
ATOM   2351  H   THR c 240       0.785  18.964  89.158  1.00  0.00      chA   
ATOM   2352  CA  THR c 240       1.255  19.309  91.352  1.00  0.00      chA   
ATOM   2353  HA  THR c 240       2.252  19.574  91.709  1.00  0.00      chA   
ATOM   2354  CB  THR c 240       0.219  20.336  91.942  1.00  0.00      chA   
ATOM   2355  HB  THR c 240       0.388  21.235  91.349  1.00  0.00      chA   
ATOM   2356  CG2 THR c 240      -1.241  20.037  91.758  1.00  0.00      chA   
ATOM   2357 HG21 THR c 240      -1.598  19.128  92.242  1.00  0.00      chA   
ATOM   2358 HG22 THR c 240      -1.771  20.940  92.061  1.00  0.00      chA   
ATOM   2359 HG23 THR c 240      -1.338  19.857  90.687  1.00  0.00      chA   
ATOM   2360  OG1 THR c 240       0.507  20.757  93.291  1.00  0.00      chA   
ATOM   2361  HG1 THR c 240       1.396  21.110  93.371  1.00  0.00      chA   
ATOM   2362  C   THR c 240       0.975  17.957  91.921  1.00  0.00      chA   
ATOM   2363  O   THR c 240       0.627  17.068  91.155  1.00  0.00      chA   
ATOM   2364  N   VAL c 241       1.308  17.790  93.238  1.00  0.00      chA   
ATOM   2365  H   VAL c 241       1.638  18.600  93.742  1.00  0.00      chA   
ATOM   2366  CA  VAL c 241       1.540  16.491  93.935  1.00  0.00      chA   
ATOM   2367  HA  VAL c 241       1.121  15.766  93.238  1.00  0.00      chA   
ATOM   2368  CB  VAL c 241       3.083  16.165  94.050  1.00  0.00      chA   
ATOM   2369  HB  VAL c 241       3.565  16.727  94.850  1.00  0.00      chA   
ATOM   2370  CG1 VAL c 241       3.205  14.735  94.610  1.00  0.00      chA   
ATOM   2371 HG11 VAL c 241       2.910  14.648  95.655  1.00  0.00      chA   
ATOM   2372 HG12 VAL c 241       2.553  14.048  94.069  1.00  0.00      chA   
ATOM   2373 HG13 VAL c 241       4.242  14.421  94.496  1.00  0.00      chA   
ATOM   2374  CG2 VAL c 241       3.856  16.362  92.755  1.00  0.00      chA   
ATOM   2375 HG21 VAL c 241       4.069  17.424  92.630  1.00  0.00      chA   
ATOM   2376 HG22 VAL c 241       4.829  15.885  92.873  1.00  0.00      chA   
ATOM   2377 HG23 VAL c 241       3.379  16.068  91.819  1.00  0.00      chA   
ATOM   2378  C   VAL c 241       0.772  16.400  95.250  1.00  0.00      chA   
ATOM   2379  O   VAL c 241       0.879  17.268  96.106  1.00  0.00      chA   
ATOM   2380  N   MET c 242      -0.135  15.455  95.443  1.00  0.00      chA   
ATOM   2381  H   MET c 242      -0.194  14.762  94.710  1.00  0.00      chA   
ATOM   2382  CA  MET c 242      -1.146  15.341  96.523  1.00  0.00      chA   
ATOM   2383  HA  MET c 242      -0.820  16.026  97.306  1.00  0.00      chA   
ATOM   2384  CB  MET c 242      -2.513  15.828  96.018  1.00  0.00      chA   
ATOM   2385  HB2 MET c 242      -2.666  15.273  95.092  1.00  0.00      chA   
ATOM   2386  HB3 MET c 242      -3.396  15.643  96.629  1.00  0.00      chA   
ATOM   2387  CG  MET c 242      -2.444  17.294  95.691  1.00  0.00      chA   
ATOM   2388  HG2 MET c 242      -2.122  17.756  96.624  1.00  0.00      chA   
ATOM   2389  HG3 MET c 242      -1.707  17.447  94.903  1.00  0.00      chA   
ATOM   2390  SD  MET c 242      -3.966  18.150  95.255  1.00  0.00      chA   
ATOM   2391  CE  MET c 242      -3.327  19.808  95.232  1.00  0.00      chA   
ATOM   2392  HE1 MET c 242      -3.167  20.069  96.278  1.00  0.00      chA   
ATOM   2393  HE2 MET c 242      -2.470  19.687  94.569  1.00  0.00      chA   
ATOM   2394  HE3 MET c 242      -4.042  20.560  94.897  1.00  0.00      chA   
ATOM   2395  C   MET c 242      -1.374  13.953  97.190  1.00  0.00      chA   
ATOM   2396  O   MET c 242      -1.309  12.855  96.576  1.00  0.00      chA   
ATOM   2397  N   THR c 243      -1.846  14.010  98.391  1.00  0.00      chA   
ATOM   2398  H   THR c 243      -2.085  14.919  98.760  1.00  0.00      chA   
ATOM   2399  CA  THR c 243      -2.074  12.880  99.343  1.00  0.00      chA   
ATOM   2400  HA  THR c 243      -2.015  11.922  98.827  1.00  0.00      chA   
ATOM   2401  CB  THR c 243      -0.989  12.862 100.526  1.00  0.00      chA   
ATOM   2402  HB  THR c 243      -1.197  13.664 101.236  1.00  0.00      chA   
ATOM   2403  CG2 THR c 243      -0.878  11.563 101.309  1.00  0.00      chA   
ATOM   2404 HG21 THR c 243      -0.484  10.751 100.698  1.00  0.00      chA   
ATOM   2405 HG22 THR c 243      -0.048  11.644 102.012  1.00  0.00      chA   
ATOM   2406 HG23 THR c 243      -1.775  11.213 101.818  1.00  0.00      chA   
ATOM   2407  OG1 THR c 243       0.310  13.252  99.911  1.00  0.00      chA   
ATOM   2408  HG1 THR c 243       0.959  12.608 100.201  1.00  0.00      chA   
ATOM   2409  C   THR c 243      -3.382  13.006 100.114  1.00  0.00      chA   
ATOM   2410  O   THR c 243      -3.897  14.105 100.353  1.00  0.00      chA   
ATOM   2411  N   ASP c 244      -3.994  11.880 100.433  1.00  0.00      chA   
ATOM   2412  H   ASP c 244      -3.479  11.026 100.277  1.00  0.00      chA   
ATOM   2413  CA  ASP c 244      -5.263  11.786 101.293  1.00  0.00      chA   
ATOM   2414  HA  ASP c 244      -5.187  12.552 102.064  1.00  0.00      chA   
ATOM   2415  CB  ASP c 244      -6.482  11.906 100.429  1.00  0.00      chA   
ATOM   2416  HB2 ASP c 244      -6.378  12.794  99.804  1.00  0.00      chA   
ATOM   2417  HB3 ASP c 244      -6.524  11.115  99.681  1.00  0.00      chA   
ATOM   2418  CG  ASP c 244      -7.804  11.929 101.210  1.00  0.00      chA   
ATOM   2419  OD1 ASP c 244      -8.908  11.933 100.636  1.00  0.00      chA   
ATOM   2420  OD2 ASP c 244      -7.803  12.148 102.422  1.00  0.00      chA   
ATOM   2421  C   ASP c 244      -5.226  10.452 102.004  1.00  0.00      chA   
ATOM   2422  O   ASP c 244      -4.590   9.581 101.478  1.00  0.00      chA   
ATOM   2423  N   GLY c 245      -5.752  10.385 103.211  1.00  0.00      chA   
ATOM   2424  H   GLY c 245      -6.289  11.126 103.636  1.00  0.00      chA   
ATOM   2425  CA  GLY c 245      -5.621   9.202 104.113  1.00  0.00      chA   
ATOM   2426  HA2 GLY c 245      -6.608   8.929 104.485  1.00  0.00      chA   
ATOM   2427  HA3 GLY c 245      -5.261   8.429 103.434  1.00  0.00      chA   
ATOM   2428  C   GLY c 245      -4.609   9.350 105.256  1.00  0.00      chA   
ATOM   2429  O   GLY c 245      -3.962  10.403 105.348  1.00  0.00      chA   
ATOM   2430  N   PRO c 246      -4.264   8.238 105.960  1.00  0.00      chA   
ATOM   2431  CD  PRO c 246      -4.832   6.882 105.802  1.00  0.00      chA   
ATOM   2432  HD2 PRO c 246      -4.784   6.582 104.755  1.00  0.00      chA   
ATOM   2433  HD3 PRO c 246      -5.849   6.864 106.196  1.00  0.00      chA   
ATOM   2434  CG  PRO c 246      -3.961   5.933 106.571  1.00  0.00      chA   
ATOM   2435  HG2 PRO c 246      -3.778   5.028 105.993  1.00  0.00      chA   
ATOM   2436  HG3 PRO c 246      -4.416   5.601 107.503  1.00  0.00      chA   
ATOM   2437  CB  PRO c 246      -2.701   6.817 106.916  1.00  0.00      chA   
ATOM   2438  HB2 PRO c 246      -2.070   6.814 106.027  1.00  0.00      chA   
ATOM   2439  HB3 PRO c 246      -2.070   6.546 107.762  1.00  0.00      chA   
ATOM   2440  CA  PRO c 246      -3.229   8.269 106.995  1.00  0.00      chA   
ATOM   2441  HA  PRO c 246      -3.788   8.403 107.921  1.00  0.00      chA   
ATOM   2442  C   PRO c 246      -2.093   9.293 107.032  1.00  0.00      chA   
ATOM   2443  O   PRO c 246      -1.420   9.590 106.024  1.00  0.00      chA   
ATOM   2444  N   SER c 247      -1.904   9.931 108.181  1.00  0.00      chA   
ATOM   2445  H   SER c 247      -2.344   9.428 108.939  1.00  0.00      chA   
ATOM   2446  CA  SER c 247      -0.715  10.778 108.438  1.00  0.00      chA   
ATOM   2447  HA  SER c 247      -0.467  11.319 107.525  1.00  0.00      chA   
ATOM   2448  CB  SER c 247      -0.867  11.770 109.600  1.00  0.00      chA   
ATOM   2449  HB2 SER c 247       0.060  12.311 109.792  1.00  0.00      chA   
ATOM   2450  HB3 SER c 247      -1.572  12.512 109.226  1.00  0.00      chA   
ATOM   2451  OG  SER c 247      -1.364  11.163 110.814  1.00  0.00      chA   
ATOM   2452  HG  SER c 247      -0.843  11.595 111.495  1.00  0.00      chA   
ATOM   2453  C   SER c 247       0.519   9.948 108.736  1.00  0.00      chA   
ATOM   2454  O   SER c 247       1.618  10.308 108.438  1.00  0.00      chA   
ATOM   2455  N   ASN c 248       0.359   8.758 109.352  1.00  0.00      chA   
ATOM   2456  H   ASN c 248      -0.623   8.612 109.541  1.00  0.00      chA   
ATOM   2457  CA  ASN c 248       1.384   7.819 109.861  1.00  0.00      chA   
ATOM   2458  HA  ASN c 248       2.332   8.240 109.526  1.00  0.00      chA   
ATOM   2459  CB  ASN c 248       1.404   8.061 111.364  1.00  0.00      chA   
ATOM   2460  HB2 ASN c 248       1.481   9.088 111.718  1.00  0.00      chA   
ATOM   2461  HB3 ASN c 248       0.514   7.642 111.832  1.00  0.00      chA   
ATOM   2462  CG  ASN c 248       2.612   7.363 112.002  1.00  0.00      chA   
ATOM   2463  OD1 ASN c 248       2.468   6.507 112.873  1.00  0.00      chA   
ATOM   2464  ND2 ASN c 248       3.772   7.786 111.603  1.00  0.00      chA   
ATOM   2465 HD21 ASN c 248       4.626   7.290 111.820  1.00  0.00      chA   
ATOM   2466 HD22 ASN c 248       3.831   8.469 110.861  1.00  0.00      chA   
ATOM   2467  C   ASN c 248       1.122   6.298 109.430  1.00  0.00      chA   
ATOM   2468  O   ASN c 248       0.802   5.480 110.316  1.00  0.00      chA   
ATOM   2469  N   GLY c 249       0.939   6.060 108.116  1.00  0.00      chA   
ATOM   2470  H   GLY c 249       0.964   6.812 107.441  1.00  0.00      chA   
ATOM   2471  CA  GLY c 249       0.635   4.743 107.584  1.00  0.00      chA   
ATOM   2472  HA2 GLY c 249       1.448   4.057 107.822  1.00  0.00      chA   
ATOM   2473  HA3 GLY c 249      -0.309   4.345 107.958  1.00  0.00      chA   
ATOM   2474  C   GLY c 249       0.348   4.795 106.060  1.00  0.00      chA   
ATOM   2475  O   GLY c 249       0.576   5.823 105.405  1.00  0.00      chA   
ATOM   2476  N   GLN c 250      -0.235   3.738 105.466  1.00  0.00      chA   
ATOM   2477  H   GLN c 250      -0.515   2.946 106.027  1.00  0.00      chA   
ATOM   2478  CA  GLN c 250      -0.730   3.633 104.065  1.00  0.00      chA   
ATOM   2479  HA  GLN c 250      -0.014   4.089 103.381  1.00  0.00      chA   
ATOM   2480  CB  GLN c 250      -0.980   2.188 103.586  1.00  0.00      chA   
ATOM   2481  HB2 GLN c 250       0.015   1.748 103.646  1.00  0.00      chA   
ATOM   2482  HB3 GLN c 250      -1.576   1.601 104.285  1.00  0.00      chA   
ATOM   2483  CG  GLN c 250      -1.487   2.008 102.169  1.00  0.00      chA   
ATOM   2484  HG2 GLN c 250      -2.475   2.452 102.043  1.00  0.00      chA   
ATOM   2485  HG3 GLN c 250      -0.832   2.529 101.473  1.00  0.00      chA   
ATOM   2486  CD  GLN c 250      -1.470   0.503 101.741  1.00  0.00      chA   
ATOM   2487  OE1 GLN c 250      -1.195  -0.429 102.499  1.00  0.00      chA   
ATOM   2488  NE2 GLN c 250      -1.814   0.312 100.467  1.00  0.00      chA   
ATOM   2489 HE21 GLN c 250      -1.711  -0.649 100.172  1.00  0.00      chA   
ATOM   2490 HE22 GLN c 250      -1.750   1.018  99.747  1.00  0.00      chA   
ATOM   2491  C   GLN c 250      -1.905   4.583 103.713  1.00  0.00      chA   
ATOM   2492  O   GLN c 250      -3.081   4.136 103.651  1.00  0.00      chA   
ATOM   2493  N   ALA c 251      -1.511   5.870 103.492  1.00  0.00      chA   
ATOM   2494  H   ALA c 251      -0.540   6.040 103.716  1.00  0.00      chA   
ATOM   2495  CA  ALA c 251      -2.178   6.890 102.728  1.00  0.00      chA   
ATOM   2496  HA  ALA c 251      -3.082   7.026 103.324  1.00  0.00      chA   
ATOM   2497  CB  ALA c 251      -1.524   8.243 102.823  1.00  0.00      chA   
ATOM   2498  HB1 ALA c 251      -0.988   8.232 103.773  1.00  0.00      chA   
ATOM   2499  HB2 ALA c 251      -0.703   8.302 102.109  1.00  0.00      chA   
ATOM   2500  HB3 ALA c 251      -2.353   8.942 102.715  1.00  0.00      chA   
ATOM   2501  C   ALA c 251      -2.438   6.506 101.301  1.00  0.00      chA   
ATOM   2502  O   ALA c 251      -2.114   5.395 100.888  1.00  0.00      chA   
ATOM   2503  N   SER c 252      -2.946   7.418 100.511  1.00  0.00      chA   
ATOM   2504  H   SER c 252      -3.211   8.294 100.936  1.00  0.00      chA   
ATOM   2505  CA  SER c 252      -3.041   7.254  99.003  1.00  0.00      chA   
ATOM   2506  HA  SER c 252      -2.365   6.476  98.647  1.00  0.00      chA   
ATOM   2507  CB  SER c 252      -4.416   6.981  98.611  1.00  0.00      chA   
ATOM   2508  HB2 SER c 252      -4.719   6.103  99.181  1.00  0.00      chA   
ATOM   2509  HB3 SER c 252      -5.063   7.803  98.918  1.00  0.00      chA   
ATOM   2510  OG  SER c 252      -4.607   6.639  97.256  1.00  0.00      chA   
ATOM   2511  HG  SER c 252      -4.302   5.750  97.061  1.00  0.00      chA   
ATOM   2512  C   SER c 252      -2.518   8.533  98.341  1.00  0.00      chA   
ATOM   2513  O   SER c 252      -2.530   9.617  98.953  1.00  0.00      chA   
ATOM   2514  N   TYR c 253      -2.161   8.446  97.070  1.00  0.00      chA   
ATOM   2515  H   TYR c 253      -2.334   7.623  96.511  1.00  0.00      chA   
ATOM   2516  CA  TYR c 253      -1.447   9.504  96.292  1.00  0.00      chA   
ATOM   2517  HA  TYR c 253      -1.588  10.402  96.892  1.00  0.00      chA   
ATOM   2518  CB  TYR c 253       0.041   9.320  96.354  1.00  0.00      chA   
ATOM   2519  HB2 TYR c 253       0.378   8.665  95.552  1.00  0.00      chA   
ATOM   2520  HB3 TYR c 253       0.629  10.235  96.289  1.00  0.00      chA   
ATOM   2521  CG  TYR c 253       0.569   8.512  97.567  1.00  0.00      chA   
ATOM   2522  CD1 TYR c 253       0.490   7.054  97.540  1.00  0.00      chA   
ATOM   2523  HD1 TYR c 253       0.176   6.526  96.651  1.00  0.00      chA   
ATOM   2524  CE1 TYR c 253       0.712   6.347  98.762  1.00  0.00      chA   
ATOM   2525  HE1 TYR c 253       0.533   5.285  98.682  1.00  0.00      chA   
ATOM   2526  CZ  TYR c 253       0.926   7.047  99.943  1.00  0.00      chA   
ATOM   2527  OH  TYR c 253       1.053   6.387 101.111  1.00  0.00      chA   
ATOM   2528  HH  TYR c 253       0.954   5.436 101.021  1.00  0.00      chA   
ATOM   2529  CE2 TYR c 253       0.975   8.467  99.947  1.00  0.00      chA   
ATOM   2530  HE2 TYR c 253       1.188   8.925 100.902  1.00  0.00      chA   
ATOM   2531  CD2 TYR c 253       0.814   9.223  98.764  1.00  0.00      chA   
ATOM   2532  HD2 TYR c 253       0.859  10.302  98.745  1.00  0.00      chA   
ATOM   2533  C   TYR c 253      -1.984   9.703  94.866  1.00  0.00      chA   
ATOM   2534  O   TYR c 253      -2.488   8.740  94.238  1.00  0.00      chA   
ATOM   2535  N   LYS c 254      -1.900  10.946  94.324  1.00  0.00      chA   
ATOM   2536  H   LYS c 254      -1.529  11.611  94.987  1.00  0.00      chA   
ATOM   2537  CA  LYS c 254      -2.331  11.404  93.017  1.00  0.00      chA   
ATOM   2538  HA  LYS c 254      -2.275  10.591  92.294  1.00  0.00      chA   
ATOM   2539  CB  LYS c 254      -3.831  11.854  93.134  1.00  0.00      chA   
ATOM   2540  HB2 LYS c 254      -3.842  12.510  94.004  1.00  0.00      chA   
ATOM   2541  HB3 LYS c 254      -4.057  12.519  92.302  1.00  0.00      chA   
ATOM   2542  CG  LYS c 254      -4.886  10.791  93.421  1.00  0.00      chA   
ATOM   2543  HG2 LYS c 254      -4.653   9.872  92.883  1.00  0.00      chA   
ATOM   2544  HG3 LYS c 254      -4.912  10.613  94.496  1.00  0.00      chA   
ATOM   2545  CD  LYS c 254      -6.361  11.304  93.114  1.00  0.00      chA   
ATOM   2546  HD2 LYS c 254      -6.545  12.201  93.707  1.00  0.00      chA   
ATOM   2547  HD3 LYS c 254      -6.448  11.485  92.043  1.00  0.00      chA   
ATOM   2548  CE  LYS c 254      -7.247  10.208  93.575  1.00  0.00      chA   
ATOM   2549  HE2 LYS c 254      -7.044   9.218  93.166  1.00  0.00      chA   
ATOM   2550  HE3 LYS c 254      -7.096  10.154  94.653  1.00  0.00      chA   
ATOM   2551  NZ  LYS c 254      -8.613  10.657  93.338  1.00  0.00      chA   
ATOM   2552  HZ1 LYS c 254      -8.916  10.810  92.387  1.00  0.00      chA   
ATOM   2553  HZ2 LYS c 254      -9.205   9.963  93.774  1.00  0.00      chA   
ATOM   2554  HZ3 LYS c 254      -8.971  11.384  93.941  1.00  0.00      chA   
ATOM   2555  C   LYS c 254      -1.522  12.580  92.584  1.00  0.00      chA   
ATOM   2556  O   LYS c 254      -0.958  13.296  93.461  1.00  0.00      chA   
ATOM   2557  N   ILE c 255      -1.578  12.863  91.307  1.00  0.00      chA   
ATOM   2558  H   ILE c 255      -2.081  12.218  90.715  1.00  0.00      chA   
ATOM   2559  CA  ILE c 255      -0.667  13.705  90.594  1.00  0.00      chA   
ATOM   2560  HA  ILE c 255      -0.495  14.511  91.308  1.00  0.00      chA   
ATOM   2561  CB  ILE c 255       0.625  13.061  90.054  1.00  0.00      chA   
ATOM   2562  HB  ILE c 255       0.317  12.745  89.058  1.00  0.00      chA   
ATOM   2563  CG2 ILE c 255       1.812  14.103  90.113  1.00  0.00      chA   
ATOM   2564 HG21 ILE c 255       2.040  14.393  91.138  1.00  0.00      chA   
ATOM   2565 HG22 ILE c 255       2.676  13.785  89.527  1.00  0.00      chA   
ATOM   2566 HG23 ILE c 255       1.416  14.965  89.578  1.00  0.00      chA   
ATOM   2567  CG1 ILE c 255       1.031  11.691  90.852  1.00  0.00      chA   
ATOM   2568 HG12 ILE c 255       1.196  11.972  91.892  1.00  0.00      chA   
ATOM   2569 HG13 ILE c 255       0.203  10.983  90.878  1.00  0.00      chA   
ATOM   2570  CD1 ILE c 255       2.327  10.950  90.371  1.00  0.00      chA   
ATOM   2571 HD11 ILE c 255       3.140  11.317  90.997  1.00  0.00      chA   
ATOM   2572 HD12 ILE c 255       2.241   9.911  90.691  1.00  0.00      chA   
ATOM   2573 HD13 ILE c 255       2.588  11.084  89.322  1.00  0.00      chA   
ATOM   2574  C   ILE c 255      -1.536  14.388  89.446  1.00  0.00      chA   
ATOM   2575  O   ILE c 255      -2.362  13.735  88.738  1.00  0.00      chA   
ATOM   2576  N   PHE c 256      -1.128  15.540  89.009  1.00  0.00      chA   
ATOM   2577  H   PHE c 256      -0.308  15.986  89.396  1.00  0.00      chA   
ATOM   2578  CA  PHE c 256      -1.922  16.362  88.135  1.00  0.00      chA   
ATOM   2579  HA  PHE c 256      -2.531  15.677  87.547  1.00  0.00      chA   
ATOM   2580  CB  PHE c 256      -2.897  17.192  89.015  1.00  0.00      chA   
ATOM   2581  HB2 PHE c 256      -2.357  17.880  89.668  1.00  0.00      chA   
ATOM   2582  HB3 PHE c 256      -3.539  17.813  88.392  1.00  0.00      chA   
ATOM   2583  CG  PHE c 256      -3.881  16.346  89.760  1.00  0.00      chA   
ATOM   2584  CD1 PHE c 256      -3.724  16.262  91.171  1.00  0.00      chA   
ATOM   2585  HD1 PHE c 256      -2.942  16.802  91.684  1.00  0.00      chA   
ATOM   2586  CE1 PHE c 256      -4.704  15.535  91.971  1.00  0.00      chA   
ATOM   2587  HE1 PHE c 256      -4.378  15.385  92.989  1.00  0.00      chA   
ATOM   2588  CZ  PHE c 256      -5.776  14.902  91.390  1.00  0.00      chA   
ATOM   2589  HZ  PHE c 256      -6.489  14.382  92.013  1.00  0.00      chA   
ATOM   2590  CE2 PHE c 256      -5.831  14.950  89.973  1.00  0.00      chA   
ATOM   2591  HE2 PHE c 256      -6.565  14.398  89.403  1.00  0.00      chA   
ATOM   2592  CD2 PHE c 256      -4.960  15.718  89.202  1.00  0.00      chA   
ATOM   2593  HD2 PHE c 256      -5.002  15.637  88.126  1.00  0.00      chA   
ATOM   2594  C   PHE c 256      -1.153  17.288  87.225  1.00  0.00      chA   
ATOM   2595  O   PHE c 256      -0.087  17.786  87.601  1.00  0.00      chA   
ATOM   2596  N   LYS c 257      -1.807  17.604  86.083  1.00  0.00      chA   
ATOM   2597  H   LYS c 257      -2.679  17.129  85.892  1.00  0.00      chA   
ATOM   2598  CA  LYS c 257      -1.457  18.767  85.233  1.00  0.00      chA   
ATOM   2599  HA  LYS c 257      -0.583  19.291  85.621  1.00  0.00      chA   
ATOM   2600  CB  LYS c 257      -1.096  18.292  83.843  1.00  0.00      chA   
ATOM   2601  HB2 LYS c 257      -0.393  17.491  84.072  1.00  0.00      chA   
ATOM   2602  HB3 LYS c 257      -1.989  17.801  83.457  1.00  0.00      chA   
ATOM   2603  CG  LYS c 257      -0.554  19.279  82.749  1.00  0.00      chA   
ATOM   2604  HG2 LYS c 257      -1.336  20.011  82.546  1.00  0.00      chA   
ATOM   2605  HG3 LYS c 257       0.376  19.704  83.126  1.00  0.00      chA   
ATOM   2606  CD  LYS c 257      -0.360  18.437  81.457  1.00  0.00      chA   
ATOM   2607  HD2 LYS c 257       0.164  17.502  81.659  1.00  0.00      chA   
ATOM   2608  HD3 LYS c 257      -1.324  18.142  81.042  1.00  0.00      chA   
ATOM   2609  CE  LYS c 257       0.437  19.233  80.452  1.00  0.00      chA   
ATOM   2610  HE2 LYS c 257       0.001  20.227  80.340  1.00  0.00      chA   
ATOM   2611  HE3 LYS c 257       1.432  19.407  80.861  1.00  0.00      chA   
ATOM   2612  NZ  LYS c 257       0.634  18.471  79.164  1.00  0.00      chA   
ATOM   2613  HZ1 LYS c 257       1.276  17.694  79.234  1.00  0.00      chA   
ATOM   2614  HZ2 LYS c 257      -0.290  18.175  78.886  1.00  0.00      chA   
ATOM   2615  HZ3 LYS c 257       0.986  19.057  78.420  1.00  0.00      chA   
ATOM   2616  C   LYS c 257      -2.540  19.844  85.052  1.00  0.00      chA   
ATOM   2617  O   LYS c 257      -3.663  19.412  84.771  1.00  0.00      chA   
ATOM   2618  N   MET c 258      -2.195  21.107  85.281  1.00  0.00      chA   
ATOM   2619  H   MET c 258      -1.238  21.428  85.231  1.00  0.00      chA   
ATOM   2620  CA  MET c 258      -3.205  22.199  85.086  1.00  0.00      chA   
ATOM   2621  HA  MET c 258      -4.098  21.821  84.588  1.00  0.00      chA   
ATOM   2622  CB  MET c 258      -3.739  22.809  86.460  1.00  0.00      chA   
ATOM   2623  HB2 MET c 258      -4.374  23.671  86.252  1.00  0.00      chA   
ATOM   2624  HB3 MET c 258      -4.322  22.048  86.978  1.00  0.00      chA   
ATOM   2625  CG  MET c 258      -2.538  23.230  87.371  1.00  0.00      chA   
ATOM   2626  HG2 MET c 258      -1.568  23.249  86.873  1.00  0.00      chA   
ATOM   2627  HG3 MET c 258      -2.883  24.230  87.632  1.00  0.00      chA   
ATOM   2628  SD  MET c 258      -2.076  22.210  88.841  1.00  0.00      chA   
ATOM   2629  CE  MET c 258      -0.625  23.153  89.419  1.00  0.00      chA   
ATOM   2630  HE1 MET c 258      -0.041  23.336  88.516  1.00  0.00      chA   
ATOM   2631  HE2 MET c 258      -0.911  24.142  89.777  1.00  0.00      chA   
ATOM   2632  HE3 MET c 258      -0.057  22.596  90.165  1.00  0.00      chA   
ATOM   2633  C   MET c 258      -2.666  23.315  84.056  1.00  0.00      chA   
ATOM   2634  O   MET c 258      -1.510  23.327  83.686  1.00  0.00      chA   
ATOM   2635  N   GLU c 259      -3.608  24.043  83.402  1.00  0.00      chA   
ATOM   2636  H   GLU c 259      -4.582  23.971  83.660  1.00  0.00      chA   
ATOM   2637  CA  GLU c 259      -3.412  24.711  82.085  1.00  0.00      chA   
ATOM   2638  HA  GLU c 259      -2.436  25.160  82.264  1.00  0.00      chA   
ATOM   2639  CB  GLU c 259      -3.464  23.737  80.874  1.00  0.00      chA   
ATOM   2640  HB2 GLU c 259      -2.748  22.950  81.111  1.00  0.00      chA   
ATOM   2641  HB3 GLU c 259      -4.500  23.413  80.773  1.00  0.00      chA   
ATOM   2642  CG  GLU c 259      -3.052  24.519  79.631  1.00  0.00      chA   
ATOM   2643  HG2 GLU c 259      -3.154  25.603  79.619  1.00  0.00      chA   
ATOM   2644  HG3 GLU c 259      -1.964  24.465  79.610  1.00  0.00      chA   
ATOM   2645  CD  GLU c 259      -3.612  23.960  78.320  1.00  0.00      chA   
ATOM   2646  OE1 GLU c 259      -2.994  23.120  77.704  1.00  0.00      chA   
ATOM   2647  OE2 GLU c 259      -4.806  24.274  77.952  1.00  0.00      chA   
ATOM   2648  C   GLU c 259      -4.453  25.764  81.996  1.00  0.00      chA   
ATOM   2649  O   GLU c 259      -5.671  25.516  82.053  1.00  0.00      chA   
ATOM   2650  N   LYS c 260      -4.082  27.042  81.934  1.00  0.00      chA   
ATOM   2651  H   LYS c 260      -3.104  27.274  81.835  1.00  0.00      chA   
ATOM   2652  CA  LYS c 260      -4.939  28.272  82.259  1.00  0.00      chA   
ATOM   2653  HA  LYS c 260      -4.238  29.070  82.504  1.00  0.00      chA   
ATOM   2654  CB  LYS c 260      -5.603  28.779  81.013  1.00  0.00      chA   
ATOM   2655  HB2 LYS c 260      -6.330  28.026  80.708  1.00  0.00      chA   
ATOM   2656  HB3 LYS c 260      -6.013  29.785  81.097  1.00  0.00      chA   
ATOM   2657  CG  LYS c 260      -4.757  29.015  79.801  1.00  0.00      chA   
ATOM   2658  HG2 LYS c 260      -4.559  28.024  79.395  1.00  0.00      chA   
ATOM   2659  HG3 LYS c 260      -5.381  29.527  79.068  1.00  0.00      chA   
ATOM   2660  CD  LYS c 260      -3.557  29.917  80.140  1.00  0.00      chA   
ATOM   2661  HD2 LYS c 260      -3.858  30.925  80.426  1.00  0.00      chA   
ATOM   2662  HD3 LYS c 260      -2.918  29.384  80.846  1.00  0.00      chA   
ATOM   2663  CE  LYS c 260      -2.801  30.137  78.846  1.00  0.00      chA   
ATOM   2664  HE2 LYS c 260      -2.419  29.206  78.426  1.00  0.00      chA   
ATOM   2665  HE3 LYS c 260      -3.284  30.644  78.010  1.00  0.00      chA   
ATOM   2666  NZ  LYS c 260      -1.555  30.910  79.182  1.00  0.00      chA   
ATOM   2667  HZ1 LYS c 260      -0.887  30.730  78.446  1.00  0.00      chA   
ATOM   2668  HZ2 LYS c 260      -1.716  31.906  79.209  1.00  0.00      chA   
ATOM   2669  HZ3 LYS c 260      -1.107  30.563  80.018  1.00  0.00      chA   
ATOM   2670  C   LYS c 260      -5.911  28.219  83.454  1.00  0.00      chA   
ATOM   2671  O   LYS c 260      -6.710  29.122  83.763  1.00  0.00      chA   
ATOM   2672  N   GLY c 261      -5.784  27.104  84.218  1.00  0.00      chA   
ATOM   2673  H   GLY c 261      -5.187  26.361  83.885  1.00  0.00      chA   
ATOM   2674  CA  GLY c 261      -6.347  26.900  85.597  1.00  0.00      chA   
ATOM   2675  HA2 GLY c 261      -5.484  26.919  86.262  1.00  0.00      chA   
ATOM   2676  HA3 GLY c 261      -6.978  27.733  85.910  1.00  0.00      chA   
ATOM   2677  C   GLY c 261      -7.147  25.530  85.798  1.00  0.00      chA   
ATOM   2678  O   GLY c 261      -6.906  24.969  86.860  1.00  0.00      chA   
ATOM   2679  N   LYS c 262      -7.805  25.025  84.757  1.00  0.00      chA   
ATOM   2680  H   LYS c 262      -7.809  25.447  83.839  1.00  0.00      chA   
ATOM   2681  CA  LYS c 262      -8.405  23.646  84.750  1.00  0.00      chA   
ATOM   2682  HA  LYS c 262      -8.999  23.411  85.633  1.00  0.00      chA   
ATOM   2683  CB  LYS c 262      -9.337  23.446  83.549  1.00  0.00      chA   
ATOM   2684  HB2 LYS c 262      -8.750  23.693  82.664  1.00  0.00      chA   
ATOM   2685  HB3 LYS c 262      -9.592  22.391  83.435  1.00  0.00      chA   
ATOM   2686  CG  LYS c 262     -10.658  24.226  83.514  1.00  0.00      chA   
ATOM   2687  HG2 LYS c 262     -10.588  25.238  83.915  1.00  0.00      chA   
ATOM   2688  HG3 LYS c 262     -10.894  24.263  82.451  1.00  0.00      chA   
ATOM   2689  CD  LYS c 262     -11.803  23.392  84.195  1.00  0.00      chA   
ATOM   2690  HD2 LYS c 262     -11.576  22.374  83.876  1.00  0.00      chA   
ATOM   2691  HD3 LYS c 262     -11.798  23.388  85.286  1.00  0.00      chA   
ATOM   2692  CE  LYS c 262     -13.283  23.713  83.791  1.00  0.00      chA   
ATOM   2693  HE2 LYS c 262     -13.493  23.617  82.727  1.00  0.00      chA   
ATOM   2694  HE3 LYS c 262     -13.988  23.087  84.339  1.00  0.00      chA   
ATOM   2695  NZ  LYS c 262     -13.622  25.087  84.209  1.00  0.00      chA   
ATOM   2696  HZ1 LYS c 262     -14.580  25.326  83.996  1.00  0.00      chA   
ATOM   2697  HZ2 LYS c 262     -13.529  25.014  85.212  1.00  0.00      chA   
ATOM   2698  HZ3 LYS c 262     -12.992  25.744  83.772  1.00  0.00      chA   
ATOM   2699  C   LYS c 262      -7.353  22.648  84.856  1.00  0.00      chA   
ATOM   2700  O   LYS c 262      -6.353  22.810  84.121  1.00  0.00      chA   
ATOM   2701  N   VAL c 263      -7.601  21.559  85.616  1.00  0.00      chA   
ATOM   2702  H   VAL c 263      -8.438  21.513  86.179  1.00  0.00      chA   
ATOM   2703  CA  VAL c 263      -6.955  20.271  85.347  1.00  0.00      chA   
ATOM   2704  HA  VAL c 263      -5.909  20.460  85.590  1.00  0.00      chA   
ATOM   2705  CB  VAL c 263      -7.375  19.129  86.265  1.00  0.00      chA   
ATOM   2706  HB  VAL c 263      -8.417  19.007  85.970  1.00  0.00      chA   
ATOM   2707  CG1 VAL c 263      -6.562  17.810  85.952  1.00  0.00      chA   
ATOM   2708 HG11 VAL c 263      -5.515  18.061  85.788  1.00  0.00      chA   
ATOM   2709 HG12 VAL c 263      -6.737  17.091  86.753  1.00  0.00      chA   
ATOM   2710 HG13 VAL c 263      -7.014  17.243  85.139  1.00  0.00      chA   
ATOM   2711  CG2 VAL c 263      -7.215  19.325  87.769  1.00  0.00      chA   
ATOM   2712 HG21 VAL c 263      -7.668  20.254  88.115  1.00  0.00      chA   
ATOM   2713 HG22 VAL c 263      -7.875  18.631  88.289  1.00  0.00      chA   
ATOM   2714 HG23 VAL c 263      -6.173  19.164  88.043  1.00  0.00      chA   
ATOM   2715  C   VAL c 263      -7.238  19.801  83.918  1.00  0.00      chA   
ATOM   2716  O   VAL c 263      -8.358  19.968  83.346  1.00  0.00      chA   
ATOM   2717  N   VAL c 264      -6.112  19.317  83.255  1.00  0.00      chA   
ATOM   2718  H   VAL c 264      -5.243  19.159  83.743  1.00  0.00      chA   
ATOM   2719  CA  VAL c 264      -6.213  18.833  81.869  1.00  0.00      chA   
ATOM   2720  HA  VAL c 264      -7.249  18.850  81.530  1.00  0.00      chA   
ATOM   2721  CB  VAL c 264      -5.447  19.667  80.818  1.00  0.00      chA   
ATOM   2722  HB  VAL c 264      -5.355  19.165  79.855  1.00  0.00      chA   
ATOM   2723  CG1 VAL c 264      -6.054  21.040  80.657  1.00  0.00      chA   
ATOM   2724 HG11 VAL c 264      -5.781  21.568  79.744  1.00  0.00      chA   
ATOM   2725 HG12 VAL c 264      -7.114  20.929  80.428  1.00  0.00      chA   
ATOM   2726 HG13 VAL c 264      -5.840  21.638  81.544  1.00  0.00      chA   
ATOM   2727  CG2 VAL c 264      -3.994  19.839  81.187  1.00  0.00      chA   
ATOM   2728 HG21 VAL c 264      -3.824  20.548  81.997  1.00  0.00      chA   
ATOM   2729 HG22 VAL c 264      -3.621  18.860  81.487  1.00  0.00      chA   
ATOM   2730 HG23 VAL c 264      -3.316  20.150  80.392  1.00  0.00      chA   
ATOM   2731  C   VAL c 264      -5.741  17.405  81.770  1.00  0.00      chA   
ATOM   2732  O   VAL c 264      -6.100  16.738  80.820  1.00  0.00      chA   
ATOM   2733  N   LYS c 265      -5.100  16.832  82.821  1.00  0.00      chA   
ATOM   2734  H   LYS c 265      -5.018  17.368  83.673  1.00  0.00      chA   
ATOM   2735  CA  LYS c 265      -4.765  15.433  82.964  1.00  0.00      chA   
ATOM   2736  HA  LYS c 265      -5.571  14.788  82.614  1.00  0.00      chA   
ATOM   2737  CB  LYS c 265      -3.507  15.124  82.058  1.00  0.00      chA   
ATOM   2738  HB2 LYS c 265      -3.555  15.682  81.122  1.00  0.00      chA   
ATOM   2739  HB3 LYS c 265      -2.643  15.517  82.591  1.00  0.00      chA   
ATOM   2740  CG  LYS c 265      -3.366  13.644  81.786  1.00  0.00      chA   
ATOM   2741  HG2 LYS c 265      -3.303  13.206  82.783  1.00  0.00      chA   
ATOM   2742  HG3 LYS c 265      -4.341  13.340  81.401  1.00  0.00      chA   
ATOM   2743  CD  LYS c 265      -2.186  13.119  80.947  1.00  0.00      chA   
ATOM   2744  HD2 LYS c 265      -2.262  13.413  79.901  1.00  0.00      chA   
ATOM   2745  HD3 LYS c 265      -1.319  13.654  81.336  1.00  0.00      chA   
ATOM   2746  CE  LYS c 265      -2.097  11.636  81.122  1.00  0.00      chA   
ATOM   2747  HE2 LYS c 265      -1.643  11.417  82.089  1.00  0.00      chA   
ATOM   2748  HE3 LYS c 265      -3.073  11.152  81.129  1.00  0.00      chA   
ATOM   2749  NZ  LYS c 265      -1.202  10.957  80.146  1.00  0.00      chA   
ATOM   2750  HZ1 LYS c 265      -0.233  11.156  80.350  1.00  0.00      chA   
ATOM   2751  HZ2 LYS c 265      -1.384   9.970  80.257  1.00  0.00      chA   
ATOM   2752  HZ3 LYS c 265      -1.294  11.100  79.150  1.00  0.00      chA   
ATOM   2753  C   LYS c 265      -4.366  15.109  84.372  1.00  0.00      chA   
ATOM   2754  O   LYS c 265      -3.781  15.930  85.078  1.00  0.00      chA   
ATOM   2755  N   SER c 266      -4.742  13.905  84.783  1.00  0.00      chA   
ATOM   2756  H   SER c 266      -5.340  13.394  84.148  1.00  0.00      chA   
ATOM   2757  CA  SER c 266      -4.463  13.358  86.109  1.00  0.00      chA   
ATOM   2758  HA  SER c 266      -3.823  13.988  86.728  1.00  0.00      chA   
ATOM   2759  CB  SER c 266      -5.768  13.096  86.887  1.00  0.00      chA   
ATOM   2760  HB2 SER c 266      -5.530  12.745  87.891  1.00  0.00      chA   
ATOM   2761  HB3 SER c 266      -6.352  14.012  86.977  1.00  0.00      chA   
ATOM   2762  OG  SER c 266      -6.472  12.014  86.218  1.00  0.00      chA   
ATOM   2763  HG  SER c 266      -6.573  11.445  86.985  1.00  0.00      chA   
ATOM   2764  C   SER c 266      -3.723  11.990  85.971  1.00  0.00      chA   
ATOM   2765  O   SER c 266      -3.917  11.254  85.028  1.00  0.00      chA   
ATOM   2766  N   VAL c 267      -2.952  11.531  87.012  1.00  0.00      chA   
ATOM   2767  H   VAL c 267      -2.597  12.177  87.703  1.00  0.00      chA   
ATOM   2768  CA  VAL c 267      -2.696  10.095  87.267  1.00  0.00      chA   
ATOM   2769  HA  VAL c 267      -3.427   9.502  86.717  1.00  0.00      chA   
ATOM   2770  CB  VAL c 267      -1.268   9.655  86.878  1.00  0.00      chA   
ATOM   2771  HB  VAL c 267      -1.151   8.601  87.124  1.00  0.00      chA   
ATOM   2772  CG1 VAL c 267      -0.982   9.785  85.414  1.00  0.00      chA   
ATOM   2773 HG11 VAL c 267      -1.818   9.618  84.735  1.00  0.00      chA   
ATOM   2774 HG12 VAL c 267      -0.614  10.796  85.234  1.00  0.00      chA   
ATOM   2775 HG13 VAL c 267      -0.234   9.070  85.071  1.00  0.00      chA   
ATOM   2776  CG2 VAL c 267      -0.176  10.364  87.698  1.00  0.00      chA   
ATOM   2777 HG21 VAL c 267      -0.338  10.160  88.756  1.00  0.00      chA   
ATOM   2778 HG22 VAL c 267       0.785   9.893  87.492  1.00  0.00      chA   
ATOM   2779 HG23 VAL c 267      -0.275  11.434  87.513  1.00  0.00      chA   
ATOM   2780  C   VAL c 267      -2.909   9.817  88.792  1.00  0.00      chA   
ATOM   2781  O   VAL c 267      -2.923  10.777  89.590  1.00  0.00      chA   
ATOM   2782  N   GLU c 268      -3.166   8.594  89.167  1.00  0.00      chA   
ATOM   2783  H   GLU c 268      -3.116   7.922  88.415  1.00  0.00      chA   
ATOM   2784  CA  GLU c 268      -3.474   8.229  90.579  1.00  0.00      chA   
ATOM   2785  HA  GLU c 268      -3.087   9.009  91.235  1.00  0.00      chA   
ATOM   2786  CB  GLU c 268      -5.045   8.024  90.718  1.00  0.00      chA   
ATOM   2787  HB2 GLU c 268      -5.401   7.100  90.265  1.00  0.00      chA   
ATOM   2788  HB3 GLU c 268      -5.194   7.958  91.796  1.00  0.00      chA   
ATOM   2789  CG  GLU c 268      -5.982   9.135  90.407  1.00  0.00      chA   
ATOM   2790  HG2 GLU c 268      -6.915   9.122  90.970  1.00  0.00      chA   
ATOM   2791  HG3 GLU c 268      -5.508  10.089  90.637  1.00  0.00      chA   
ATOM   2792  CD  GLU c 268      -6.311   9.316  88.902  1.00  0.00      chA   
ATOM   2793  OE1 GLU c 268      -6.929  10.338  88.475  1.00  0.00      chA   
ATOM   2794  OE2 GLU c 268      -5.966   8.487  88.042  1.00  0.00      chA   
ATOM   2795  C   GLU c 268      -2.822   6.916  90.886  1.00  0.00      chA   
ATOM   2796  O   GLU c 268      -2.879   5.914  90.151  1.00  0.00      chA   
ATOM   2797  N   LEU c 269      -2.311   6.799  92.161  1.00  0.00      chA   
ATOM   2798  H   LEU c 269      -2.396   7.607  92.761  1.00  0.00      chA   
ATOM   2799  CA  LEU c 269      -1.602   5.629  92.663  1.00  0.00      chA   
ATOM   2800  HA  LEU c 269      -2.036   4.751  92.185  1.00  0.00      chA   
ATOM   2801  CB  LEU c 269      -0.112   5.677  92.337  1.00  0.00      chA   
ATOM   2802  HB2 LEU c 269       0.200   4.676  92.635  1.00  0.00      chA   
ATOM   2803  HB3 LEU c 269       0.072   5.645  91.263  1.00  0.00      chA   
ATOM   2804  CG  LEU c 269       0.680   6.727  93.053  1.00  0.00      chA   
ATOM   2805  HG  LEU c 269       0.400   6.846  94.100  1.00  0.00      chA   
ATOM   2806  CD1 LEU c 269       2.168   6.293  93.058  1.00  0.00      chA   
ATOM   2807 HD11 LEU c 269       2.488   6.092  92.036  1.00  0.00      chA   
ATOM   2808 HD12 LEU c 269       2.768   6.966  93.669  1.00  0.00      chA   
ATOM   2809 HD13 LEU c 269       2.241   5.322  93.547  1.00  0.00      chA   
ATOM   2810  CD2 LEU c 269       0.780   8.206  92.367  1.00  0.00      chA   
ATOM   2811 HD21 LEU c 269      -0.214   8.640  92.252  1.00  0.00      chA   
ATOM   2812 HD22 LEU c 269       1.373   8.852  93.013  1.00  0.00      chA   
ATOM   2813 HD23 LEU c 269       1.210   8.176  91.366  1.00  0.00      chA   
ATOM   2814  C   LEU c 269      -1.744   5.249  94.211  1.00  0.00      chA   
ATOM   2815  O   LEU c 269      -2.153   6.024  95.076  1.00  0.00      chA   
ATOM   2816  N   ASP c 270      -1.594   3.921  94.459  1.00  0.00      chA   
ATOM   2817  H   ASP c 270      -1.265   3.354  93.691  1.00  0.00      chA   
ATOM   2818  CA  ASP c 270      -1.540   3.334  95.764  1.00  0.00      chA   
ATOM   2819  HA  ASP c 270      -1.501   4.089  96.549  1.00  0.00      chA   
ATOM   2820  CB  ASP c 270      -2.806   2.439  95.994  1.00  0.00      chA   
ATOM   2821  HB2 ASP c 270      -3.191   1.975  95.085  1.00  0.00      chA   
ATOM   2822  HB3 ASP c 270      -2.490   1.639  96.663  1.00  0.00      chA   
ATOM   2823  CG  ASP c 270      -3.972   3.297  96.559  1.00  0.00      chA   
ATOM   2824  OD1 ASP c 270      -3.866   3.828  97.674  1.00  0.00      chA   
ATOM   2825  OD2 ASP c 270      -5.021   3.336  95.928  1.00  0.00      chA   
ATOM   2826  C   ASP c 270      -0.230   2.447  95.738  1.00  0.00      chA   
ATOM   2827  O   ASP c 270       0.301   2.144  94.682  1.00  0.00      chA   
ATOM   2828  N   ALA c 271       0.240   2.168  96.980  1.00  0.00      chA   
ATOM   2829  H   ALA c 271      -0.371   2.332  97.767  1.00  0.00      chA   
ATOM   2830  CA  ALA c 271       1.423   1.290  97.123  1.00  0.00      chA   
ATOM   2831  HA  ALA c 271       1.447   0.578  96.298  1.00  0.00      chA   
ATOM   2832  CB  ALA c 271       2.748   1.996  97.158  1.00  0.00      chA   
ATOM   2833  HB1 ALA c 271       2.708   2.689  97.999  1.00  0.00      chA   
ATOM   2834  HB2 ALA c 271       3.450   1.176  97.311  1.00  0.00      chA   
ATOM   2835  HB3 ALA c 271       2.933   2.618  96.283  1.00  0.00      chA   
ATOM   2836  C   ALA c 271       1.150   0.538  98.495  1.00  0.00      chA   
ATOM   2837  O   ALA c 271       0.802   1.118  99.468  1.00  0.00      chA   
ATOM   2838  N   PRO c 272       1.470  -0.762  98.613  1.00  0.00      chA   
ATOM   2839  CD  PRO c 272       1.968  -1.550  97.513  1.00  0.00      chA   
ATOM   2840  HD2 PRO c 272       2.803  -1.130  96.953  1.00  0.00      chA   
ATOM   2841  HD3 PRO c 272       1.181  -1.933  96.864  1.00  0.00      chA   
ATOM   2842  CG  PRO c 272       2.661  -2.791  98.098  1.00  0.00      chA   
ATOM   2843  HG2 PRO c 272       3.669  -2.499  98.393  1.00  0.00      chA   
ATOM   2844  HG3 PRO c 272       2.676  -3.640  97.416  1.00  0.00      chA   
ATOM   2845  CB  PRO c 272       1.862  -2.940  99.408  1.00  0.00      chA   
ATOM   2846  HB2 PRO c 272       2.396  -3.533 100.150  1.00  0.00      chA   
ATOM   2847  HB3 PRO c 272       0.951  -3.472  99.136  1.00  0.00      chA   
ATOM   2848  CA  PRO c 272       1.525  -1.479  99.832  1.00  0.00      chA   
ATOM   2849  HA  PRO c 272       0.534  -1.461 100.284  1.00  0.00      chA   
ATOM   2850  C   PRO c 272       2.500  -1.039 100.866  1.00  0.00      chA   
ATOM   2851  O   PRO c 272       2.487  -1.669 101.970  1.00  0.00      chA   
ATOM   2852  N   ASN c 273       3.401  -0.078 100.647  1.00  0.00      chA   
ATOM   2853  H   ASN c 273       3.360   0.334  99.726  1.00  0.00      chA   
ATOM   2854  CA  ASN c 273       4.351   0.394 101.682  1.00  0.00      chA   
ATOM   2855  HA  ASN c 273       3.891   0.439 102.670  1.00  0.00      chA   
ATOM   2856  CB  ASN c 273       5.505  -0.655 101.792  1.00  0.00      chA   
ATOM   2857  HB2 ASN c 273       5.166  -1.672 101.592  1.00  0.00      chA   
ATOM   2858  HB3 ASN c 273       6.200  -0.510 100.965  1.00  0.00      chA   
ATOM   2859  CG  ASN c 273       6.323  -0.533 103.101  1.00  0.00      chA   
ATOM   2860  OD1 ASN c 273       5.937  -0.080 104.145  1.00  0.00      chA   
ATOM   2861  ND2 ASN c 273       7.645  -0.770 103.115  1.00  0.00      chA   
ATOM   2862 HD21 ASN c 273       8.200  -0.618 103.945  1.00  0.00      chA   
ATOM   2863 HD22 ASN c 273       8.122  -1.180 102.326  1.00  0.00      chA   
ATOM   2864  C   ASN c 273       4.903   1.741 101.362  1.00  0.00      chA   
ATOM   2865  O   ASN c 273       4.974   2.576 102.267  1.00  0.00      chA   
ATOM   2866  N   TYR c 274       5.094   2.086 100.103  1.00  0.00      chA   
ATOM   2867  H   TYR c 274       4.840   1.352  99.458  1.00  0.00      chA   
ATOM   2868  CA  TYR c 274       5.672   3.362  99.619  1.00  0.00      chA   
ATOM   2869  HA  TYR c 274       6.578   3.520 100.203  1.00  0.00      chA   
ATOM   2870  CB  TYR c 274       6.015   3.223  98.154  1.00  0.00      chA   
ATOM   2871  HB2 TYR c 274       6.802   2.475  98.062  1.00  0.00      chA   
ATOM   2872  HB3 TYR c 274       5.122   2.903  97.618  1.00  0.00      chA   
ATOM   2873  CG  TYR c 274       6.527   4.504  97.554  1.00  0.00      chA   
ATOM   2874  CD1 TYR c 274       7.880   4.868  97.515  1.00  0.00      chA   
ATOM   2875  HD1 TYR c 274       8.648   4.182  97.842  1.00  0.00      chA   
ATOM   2876  CE1 TYR c 274       8.304   6.066  96.981  1.00  0.00      chA   
ATOM   2877  HE1 TYR c 274       9.364   6.239  96.871  1.00  0.00      chA   
ATOM   2878  CZ  TYR c 274       7.384   7.055  96.416  1.00  0.00      chA   
ATOM   2879  OH  TYR c 274       7.714   8.139  95.771  1.00  0.00      chA   
ATOM   2880  HH  TYR c 274       8.662   8.276  95.699  1.00  0.00      chA   
ATOM   2881  CE2 TYR c 274       5.988   6.775  96.535  1.00  0.00      chA   
ATOM   2882  HE2 TYR c 274       5.281   7.510  96.180  1.00  0.00      chA   
ATOM   2883  CD2 TYR c 274       5.645   5.517  97.122  1.00  0.00      chA   
ATOM   2884  HD2 TYR c 274       4.593   5.388  97.329  1.00  0.00      chA   
ATOM   2885  C   TYR c 274       4.727   4.608  99.881  1.00  0.00      chA   
ATOM   2886  O   TYR c 274       3.494   4.566  99.765  1.00  0.00      chA   
ATOM   2887  N   HIE c 275       5.241   5.685 100.465  1.00  0.00      chA   
ATOM   2888  H   HIE c 275       6.248   5.650 100.540  1.00  0.00      chA   
ATOM   2889  CA  HIE c 275       4.561   6.935 100.895  1.00  0.00      chA   
ATOM   2890  HA  HIE c 275       3.557   6.863 100.477  1.00  0.00      chA   
ATOM   2891  CB  HIE c 275       4.356   6.809 102.445  1.00  0.00      chA   
ATOM   2892  HB2 HIE c 275       3.763   5.931 102.695  1.00  0.00      chA   
ATOM   2893  HB3 HIE c 275       5.364   6.748 102.856  1.00  0.00      chA   
ATOM   2894  CG  HIE c 275       3.720   8.051 103.181  1.00  0.00      chA   
ATOM   2895  ND1 HIE c 275       4.353   9.134 103.851  1.00  0.00      chA   
ATOM   2896  CE1 HIE c 275       3.425   9.879 104.493  1.00  0.00      chA   
ATOM   2897  HE1 HIE c 275       3.561  10.752 105.116  1.00  0.00      chA   
ATOM   2898  NE2 HIE c 275       2.240   9.366 104.224  1.00  0.00      chA   
ATOM   2899  HE2 HIE c 275       1.360   9.745 104.543  1.00  0.00      chA   
ATOM   2900  CD2 HIE c 275       2.400   8.232 103.414  1.00  0.00      chA   
ATOM   2901  HD2 HIE c 275       1.572   7.783 102.886  1.00  0.00      chA   
ATOM   2902  C   HIE c 275       5.181   8.188 100.501  1.00  0.00      chA   
ATOM   2903  O   HIE c 275       6.419   8.258 100.284  1.00  0.00      chA   
ATOM   2904  N   TYR c 276       4.330   9.200 100.299  1.00  0.00      chA   
ATOM   2905  H   TYR c 276       3.330   9.069 100.348  1.00  0.00      chA   
ATOM   2906  CA  TYR c 276       4.791  10.553 100.263  1.00  0.00      chA   
ATOM   2907  HA  TYR c 276       5.652  10.595 100.930  1.00  0.00      chA   
ATOM   2908  CB  TYR c 276       5.343  11.065  98.906  1.00  0.00      chA   
ATOM   2909  HB2 TYR c 276       5.664  12.090  99.095  1.00  0.00      chA   
ATOM   2910  HB3 TYR c 276       6.254  10.506  98.691  1.00  0.00      chA   
ATOM   2911  CG  TYR c 276       4.450  11.085  97.636  1.00  0.00      chA   
ATOM   2912  CD1 TYR c 276       3.416  12.002  97.513  1.00  0.00      chA   
ATOM   2913  HD1 TYR c 276       3.150  12.714  98.279  1.00  0.00      chA   
ATOM   2914  CE1 TYR c 276       2.599  11.952  96.396  1.00  0.00      chA   
ATOM   2915  HE1 TYR c 276       1.862  12.741  96.353  1.00  0.00      chA   
ATOM   2916  CZ  TYR c 276       2.832  11.024  95.361  1.00  0.00      chA   
ATOM   2917  OH  TYR c 276       2.078  11.108  94.231  1.00  0.00      chA   
ATOM   2918  HH  TYR c 276       1.483  11.856  94.328  1.00  0.00      chA   
ATOM   2919  CE2 TYR c 276       3.894  10.184  95.434  1.00  0.00      chA   
ATOM   2920  HE2 TYR c 276       4.044   9.467  94.642  1.00  0.00      chA   
ATOM   2921  CD2 TYR c 276       4.709  10.231  96.551  1.00  0.00      chA   
ATOM   2922  HD2 TYR c 276       5.568   9.577  96.514  1.00  0.00      chA   
ATOM   2923  C   TYR c 276       3.731  11.613 100.685  1.00  0.00      chA   
ATOM   2924  O   TYR c 276       2.529  11.447 100.459  1.00  0.00      chA   
ATOM   2925  N   GLU c 277       4.190  12.772 101.123  1.00  0.00      chA   
ATOM   2926  H   GLU c 277       5.178  12.893 101.298  1.00  0.00      chA   
ATOM   2927  CA  GLU c 277       3.494  14.052 101.259  1.00  0.00      chA   
ATOM   2928  HA  GLU c 277       2.776  14.213 100.457  1.00  0.00      chA   
ATOM   2929  CB  GLU c 277       2.710  13.990 102.584  1.00  0.00      chA   
ATOM   2930  HB2 GLU c 277       1.885  14.702 102.573  1.00  0.00      chA   
ATOM   2931  HB3 GLU c 277       2.143  13.063 102.502  1.00  0.00      chA   
ATOM   2932  CG  GLU c 277       3.447  13.914 103.932  1.00  0.00      chA   
ATOM   2933  HG2 GLU c 277       4.137  13.072 103.877  1.00  0.00      chA   
ATOM   2934  HG3 GLU c 277       3.902  14.886 104.120  1.00  0.00      chA   
ATOM   2935  CD  GLU c 277       2.344  13.636 104.958  1.00  0.00      chA   
ATOM   2936  OE1 GLU c 277       1.703  14.635 105.396  1.00  0.00      chA   
ATOM   2937  OE2 GLU c 277       1.995  12.479 105.144  1.00  0.00      chA   
ATOM   2938  C   GLU c 277       4.525  15.159 101.363  1.00  0.00      chA   
ATOM   2939  O   GLU c 277       5.717  14.899 101.307  1.00  0.00      chA   
ATOM   2940  N   GLU c 278       4.101  16.405 101.357  1.00  0.00      chA   
ATOM   2941  H   GLU c 278       3.097  16.500 101.430  1.00  0.00      chA   
ATOM   2942  CA  GLU c 278       4.830  17.646 101.308  1.00  0.00      chA   
ATOM   2943  HA  GLU c 278       4.059  18.394 101.129  1.00  0.00      chA   
ATOM   2944  CB  GLU c 278       5.308  18.009 102.700  1.00  0.00      chA   
ATOM   2945  HB2 GLU c 278       6.094  17.304 102.974  1.00  0.00      chA   
ATOM   2946  HB3 GLU c 278       5.785  18.987 102.651  1.00  0.00      chA   
ATOM   2947  CG  GLU c 278       4.094  18.047 103.727  1.00  0.00      chA   
ATOM   2948  HG2 GLU c 278       3.338  18.796 103.489  1.00  0.00      chA   
ATOM   2949  HG3 GLU c 278       3.694  17.038 103.627  1.00  0.00      chA   
ATOM   2950  CD  GLU c 278       4.452  18.476 105.172  1.00  0.00      chA   
ATOM   2951  OE1 GLU c 278       5.572  18.173 105.636  1.00  0.00      chA   
ATOM   2952  OE2 GLU c 278       3.525  18.889 105.912  1.00  0.00      chA   
ATOM   2953  C   GLU c 278       5.957  17.695 100.204  1.00  0.00      chA   
ATOM   2954  O   GLU c 278       7.082  18.103 100.414  1.00  0.00      chA   
ATOM   2955  N   CYX c 279       5.647  17.179  98.996  1.00  0.00      chA   
ATOM   2956  H   CYX c 279       4.709  16.808  98.956  1.00  0.00      chA   
ATOM   2957  CA  CYX c 279       6.667  17.099  97.944  1.00  0.00      chA   
ATOM   2958  HA  CYX c 279       7.443  16.463  98.372  1.00  0.00      chA   
ATOM   2959  CB  CYX c 279       6.170  16.325  96.671  1.00  0.00      chA   
ATOM   2960  HB2 CYX c 279       5.155  16.640  96.429  1.00  0.00      chA   
ATOM   2961  HB3 CYX c 279       6.778  16.719  95.857  1.00  0.00      chA   
ATOM   2962  SG  CYX c 279       6.140  14.438  96.699  1.00  0.00      chA   
ATOM   2963  C   CYX c 279       7.173  18.475  97.449  1.00  0.00      chA   
ATOM   2964  O   CYX c 279       6.430  19.366  97.043  1.00  0.00      chA   
ATOM   2965  N   SER c 280       8.484  18.637  97.313  1.00  0.00      chA   
ATOM   2966  H   SER c 280       9.077  17.883  97.629  1.00  0.00      chA   
ATOM   2967  CA  SER c 280       9.120  19.839  96.683  1.00  0.00      chA   
ATOM   2968  HA  SER c 280       8.509  20.735  96.793  1.00  0.00      chA   
ATOM   2969  CB  SER c 280      10.399  20.230  97.489  1.00  0.00      chA   
ATOM   2970  HB2 SER c 280      11.261  19.589  97.309  1.00  0.00      chA   
ATOM   2971  HB3 SER c 280      10.591  21.224  97.086  1.00  0.00      chA   
ATOM   2972  OG  SER c 280      10.106  20.495  98.843  1.00  0.00      chA   
ATOM   2973  HG  SER c 280      10.707  19.943  99.347  1.00  0.00      chA   
ATOM   2974  C   SER c 280       9.561  19.542  95.206  1.00  0.00      chA   
ATOM   2975  O   SER c 280      10.464  18.709  95.020  1.00  0.00      chA   
ATOM   2976  N   CYX c 281       9.071  20.346  94.289  1.00  0.00      chA   
ATOM   2977  H   CYX c 281       8.614  21.170  94.654  1.00  0.00      chA   
ATOM   2978  CA  CYX c 281       9.158  20.099  92.819  1.00  0.00      chA   
ATOM   2979  HA  CYX c 281       9.696  19.171  92.616  1.00  0.00      chA   
ATOM   2980  CB  CYX c 281       7.714  19.935  92.383  1.00  0.00      chA   
ATOM   2981  HB2 CYX c 281       7.124  20.799  92.688  1.00  0.00      chA   
ATOM   2982  HB3 CYX c 281       7.808  19.833  91.302  1.00  0.00      chA   
ATOM   2983  SG  CYX c 281       6.845  18.441  92.897  1.00  0.00      chA   
ATOM   2984  C   CYX c 281       9.911  21.167  91.959  1.00  0.00      chA   
ATOM   2985  O   CYX c 281       9.993  22.356  92.264  1.00  0.00      chA   
ATOM   2986  N   TYR c 282      10.469  20.728  90.806  1.00  0.00      chA   
ATOM   2987  H   TYR c 282      10.403  19.756  90.542  1.00  0.00      chA   
ATOM   2988  CA  TYR c 282      11.276  21.498  89.881  1.00  0.00      chA   
ATOM   2989  HA  TYR c 282      10.772  22.463  89.837  1.00  0.00      chA   
ATOM   2990  CB  TYR c 282      12.734  21.685  90.368  1.00  0.00      chA   
ATOM   2991  HB2 TYR c 282      13.254  22.328  89.657  1.00  0.00      chA   
ATOM   2992  HB3 TYR c 282      12.784  22.193  91.332  1.00  0.00      chA   
ATOM   2993  CG  TYR c 282      13.595  20.478  90.388  1.00  0.00      chA   
ATOM   2994  CD1 TYR c 282      13.595  19.532  91.459  1.00  0.00      chA   
ATOM   2995  HD1 TYR c 282      12.820  19.694  92.194  1.00  0.00      chA   
ATOM   2996  CE1 TYR c 282      14.570  18.516  91.478  1.00  0.00      chA   
ATOM   2997  HE1 TYR c 282      14.603  17.776  92.264  1.00  0.00      chA   
ATOM   2998  CZ  TYR c 282      15.350  18.233  90.353  1.00  0.00      chA   
ATOM   2999  OH  TYR c 282      16.220  17.260  90.337  1.00  0.00      chA   
ATOM   3000  HH  TYR c 282      16.548  17.109  89.448  1.00  0.00      chA   
ATOM   3001  CE2 TYR c 282      15.158  19.015  89.232  1.00  0.00      chA   
ATOM   3002  HE2 TYR c 282      15.579  18.779  88.265  1.00  0.00      chA   
ATOM   3003  CD2 TYR c 282      14.317  20.148  89.201  1.00  0.00      chA   
ATOM   3004  HD2 TYR c 282      14.293  20.806  88.345  1.00  0.00      chA   
ATOM   3005  C   TYR c 282      11.282  20.944  88.428  1.00  0.00      chA   
ATOM   3006  O   TYR c 282      11.210  19.688  88.362  1.00  0.00      chA   
ATOM   3007  N   PRO c 283      11.271  21.825  87.380  1.00  0.00      chA   
ATOM   3008  CD  PRO c 283      11.244  23.215  87.515  1.00  0.00      chA   
ATOM   3009  HD2 PRO c 283      12.126  23.584  88.037  1.00  0.00      chA   
ATOM   3010  HD3 PRO c 283      10.269  23.502  87.911  1.00  0.00      chA   
ATOM   3011  CG  PRO c 283      11.275  23.711  86.036  1.00  0.00      chA   
ATOM   3012  HG2 PRO c 283      12.279  24.078  85.819  1.00  0.00      chA   
ATOM   3013  HG3 PRO c 283      10.502  24.459  85.857  1.00  0.00      chA   
ATOM   3014  CB  PRO c 283      10.910  22.538  85.137  1.00  0.00      chA   
ATOM   3015  HB2 PRO c 283      11.445  22.802  84.223  1.00  0.00      chA   
ATOM   3016  HB3 PRO c 283       9.832  22.398  85.061  1.00  0.00      chA   
ATOM   3017  CA  PRO c 283      11.439  21.398  85.982  1.00  0.00      chA   
ATOM   3018  HA  PRO c 283      10.906  20.496  85.683  1.00  0.00      chA   
ATOM   3019  C   PRO c 283      12.984  21.162  85.675  1.00  0.00      chA   
ATOM   3020  O   PRO c 283      13.887  21.840  86.265  1.00  0.00      chA   
ATOM   3021  N   ASN c 284      13.283  20.178  84.848  1.00  0.00      chA   
ATOM   3022  H   ASN c 284      12.518  19.733  84.360  1.00  0.00      chA   
ATOM   3023  CA  ASN c 284      14.702  19.983  84.334  1.00  0.00      chA   
ATOM   3024  HA  ASN c 284      15.134  20.934  84.021  1.00  0.00      chA   
ATOM   3025  CB  ASN c 284      15.616  19.442  85.395  1.00  0.00      chA   
ATOM   3026  HB2 ASN c 284      15.969  20.319  85.939  1.00  0.00      chA   
ATOM   3027  HB3 ASN c 284      15.026  18.965  86.176  1.00  0.00      chA   
ATOM   3028  CG  ASN c 284      16.845  18.753  84.877  1.00  0.00      chA   
ATOM   3029  OD1 ASN c 284      17.879  19.244  84.466  1.00  0.00      chA   
ATOM   3030  ND2 ASN c 284      16.723  17.505  84.545  1.00  0.00      chA   
ATOM   3031 HD21 ASN c 284      17.445  17.063  83.994  1.00  0.00      chA   
ATOM   3032 HD22 ASN c 284      15.961  16.979  84.949  1.00  0.00      chA   
ATOM   3033  C   ASN c 284      14.644  19.178  83.082  1.00  0.00      chA   
ATOM   3034  O   ASN c 284      13.951  18.190  83.005  1.00  0.00      chA   
ATOM   3035  N   ALA c 285      15.416  19.535  82.075  1.00  0.00      chA   
ATOM   3036  H   ALA c 285      16.034  20.329  82.158  1.00  0.00      chA   
ATOM   3037  CA  ALA c 285      15.614  18.816  80.802  1.00  0.00      chA   
ATOM   3038  HA  ALA c 285      16.085  19.547  80.147  1.00  0.00      chA   
ATOM   3039  CB  ALA c 285      16.706  17.759  80.968  1.00  0.00      chA   
ATOM   3040  HB1 ALA c 285      17.135  17.711  79.966  1.00  0.00      chA   
ATOM   3041  HB2 ALA c 285      17.400  18.161  81.705  1.00  0.00      chA   
ATOM   3042  HB3 ALA c 285      16.441  16.746  81.272  1.00  0.00      chA   
ATOM   3043  C   ALA c 285      14.251  18.365  80.082  1.00  0.00      chA   
ATOM   3044  O   ALA c 285      14.114  17.293  79.547  1.00  0.00      chA   
ATOM   3045  N   GLY c 286      13.253  19.242  80.010  1.00  0.00      chA   
ATOM   3046  H   GLY c 286      13.506  20.106  80.469  1.00  0.00      chA   
ATOM   3047  CA  GLY c 286      11.976  18.862  79.469  1.00  0.00      chA   
ATOM   3048  HA2 GLY c 286      11.464  19.773  79.157  1.00  0.00      chA   
ATOM   3049  HA3 GLY c 286      12.099  18.318  78.533  1.00  0.00      chA   
ATOM   3050  C   GLY c 286      10.998  18.049  80.322  1.00  0.00      chA   
ATOM   3051  O   GLY c 286       9.892  17.756  79.841  1.00  0.00      chA   
ATOM   3052  N   GLU c 287      11.328  17.680  81.551  1.00  0.00      chA   
ATOM   3053  H   GLU c 287      12.223  17.970  81.917  1.00  0.00      chA   
ATOM   3054  CA  GLU c 287      10.464  16.939  82.581  1.00  0.00      chA   
ATOM   3055  HA  GLU c 287       9.458  16.923  82.162  1.00  0.00      chA   
ATOM   3056  CB  GLU c 287      11.046  15.459  82.627  1.00  0.00      chA   
ATOM   3057  HB2 GLU c 287      12.093  15.346  82.910  1.00  0.00      chA   
ATOM   3058  HB3 GLU c 287      10.477  15.038  83.455  1.00  0.00      chA   
ATOM   3059  CG  GLU c 287      10.855  14.719  81.263  1.00  0.00      chA   
ATOM   3060  HG2 GLU c 287       9.788  14.721  81.035  1.00  0.00      chA   
ATOM   3061  HG3 GLU c 287      11.361  15.239  80.450  1.00  0.00      chA   
ATOM   3062  CD  GLU c 287      11.387  13.345  81.152  1.00  0.00      chA   
ATOM   3063  OE1 GLU c 287      12.084  13.165  80.078  1.00  0.00      chA   
ATOM   3064  OE2 GLU c 287      11.226  12.460  82.072  1.00  0.00      chA   
ATOM   3065  C   GLU c 287      10.366  17.578  83.989  1.00  0.00      chA   
ATOM   3066  O   GLU c 287      11.059  18.618  84.215  1.00  0.00      chA   
ATOM   3067  N   ILE c 288       9.694  16.883  84.910  1.00  0.00      chA   
ATOM   3068  H   ILE c 288       9.129  16.112  84.580  1.00  0.00      chA   
ATOM   3069  CA  ILE c 288       9.517  17.408  86.237  1.00  0.00      chA   
ATOM   3070  HA  ILE c 288       9.972  18.393  86.333  1.00  0.00      chA   
ATOM   3071  CB  ILE c 288       8.021  17.704  86.621  1.00  0.00      chA   
ATOM   3072  HB  ILE c 288       7.429  16.788  86.618  1.00  0.00      chA   
ATOM   3073  CG2 ILE c 288       7.841  18.309  88.037  1.00  0.00      chA   
ATOM   3074 HG21 ILE c 288       7.996  17.560  88.813  1.00  0.00      chA   
ATOM   3075 HG22 ILE c 288       8.436  19.198  88.248  1.00  0.00      chA   
ATOM   3076 HG23 ILE c 288       6.820  18.689  88.059  1.00  0.00      chA   
ATOM   3077  CG1 ILE c 288       7.282  18.621  85.667  1.00  0.00      chA   
ATOM   3078 HG12 ILE c 288       7.144  18.163  84.688  1.00  0.00      chA   
ATOM   3079 HG13 ILE c 288       6.242  18.677  85.988  1.00  0.00      chA   
ATOM   3080  CD1 ILE c 288       7.825  19.975  85.321  1.00  0.00      chA   
ATOM   3081 HD11 ILE c 288       8.132  20.600  86.159  1.00  0.00      chA   
ATOM   3082 HD12 ILE c 288       8.642  19.827  84.616  1.00  0.00      chA   
ATOM   3083 HD13 ILE c 288       7.127  20.488  84.659  1.00  0.00      chA   
ATOM   3084  C   ILE c 288      10.066  16.338  87.223  1.00  0.00      chA   
ATOM   3085  O   ILE c 288       9.642  15.206  87.236  1.00  0.00      chA   
ATOM   3086  N   THR c 289      10.786  16.845  88.217  1.00  0.00      chA   
ATOM   3087  H   THR c 289      11.112  17.793  88.104  1.00  0.00      chA   
ATOM   3088  CA  THR c 289      11.280  16.094  89.333  1.00  0.00      chA   
ATOM   3089  HA  THR c 289      10.864  15.087  89.374  1.00  0.00      chA   
ATOM   3090  CB  THR c 289      12.786  15.978  89.183  1.00  0.00      chA   
ATOM   3091  HB  THR c 289      13.281  16.930  89.377  1.00  0.00      chA   
ATOM   3092  CG2 THR c 289      13.357  14.908  90.145  1.00  0.00      chA   
ATOM   3093 HG21 THR c 289      12.687  14.052  90.241  1.00  0.00      chA   
ATOM   3094 HG22 THR c 289      14.249  14.420  89.754  1.00  0.00      chA   
ATOM   3095 HG23 THR c 289      13.418  15.372  91.129  1.00  0.00      chA   
ATOM   3096  OG1 THR c 289      13.232  15.587  87.869  1.00  0.00      chA   
ATOM   3097  HG1 THR c 289      12.937  16.157  87.154  1.00  0.00      chA   
ATOM   3098  C   THR c 289      10.870  16.777  90.684  1.00  0.00      chA   
ATOM   3099  O   THR c 289      10.662  17.961  90.764  1.00  0.00      chA   
ATOM   3100  N   CYX c 290      10.721  15.961  91.701  1.00  0.00      chA   
ATOM   3101  H   CYX c 290      10.959  14.991  91.552  1.00  0.00      chA   
ATOM   3102  CA  CYX c 290      10.228  16.237  93.088  1.00  0.00      chA   
ATOM   3103  HA  CYX c 290      10.507  17.268  93.309  1.00  0.00      chA   
ATOM   3104  CB  CYX c 290       8.729  16.024  93.110  1.00  0.00      chA   
ATOM   3105  HB2 CYX c 290       8.534  14.978  92.872  1.00  0.00      chA   
ATOM   3106  HB3 CYX c 290       8.258  16.191  94.079  1.00  0.00      chA   
ATOM   3107  SG  CYX c 290       7.720  16.962  91.898  1.00  0.00      chA   
ATOM   3108  C   CYX c 290      10.915  15.414  94.162  1.00  0.00      chA   
ATOM   3109  O   CYX c 290      11.472  14.410  93.833  1.00  0.00      chA   
ATOM   3110  N   VAL c 291      10.849  15.912  95.413  1.00  0.00      chA   
ATOM   3111  H   VAL c 291      10.487  16.846  95.537  1.00  0.00      chA   
ATOM   3112  CA  VAL c 291      11.549  15.229  96.527  1.00  0.00      chA   
ATOM   3113  HA  VAL c 291      11.446  14.165  96.315  1.00  0.00      chA   
ATOM   3114  CB  VAL c 291      13.090  15.528  96.680  1.00  0.00      chA   
ATOM   3115  HB  VAL c 291      13.120  16.554  97.048  1.00  0.00      chA   
ATOM   3116  CG1 VAL c 291      13.853  14.758  97.707  1.00  0.00      chA   
ATOM   3117 HG11 VAL c 291      14.775  15.295  97.926  1.00  0.00      chA   
ATOM   3118 HG12 VAL c 291      13.377  14.749  98.686  1.00  0.00      chA   
ATOM   3119 HG13 VAL c 291      14.151  13.714  97.602  1.00  0.00      chA   
ATOM   3120  CG2 VAL c 291      13.865  15.369  95.410  1.00  0.00      chA   
ATOM   3121 HG21 VAL c 291      13.604  16.248  94.822  1.00  0.00      chA   
ATOM   3122 HG22 VAL c 291      14.949  15.428  95.513  1.00  0.00      chA   
ATOM   3123 HG23 VAL c 291      13.755  14.415  94.896  1.00  0.00      chA   
ATOM   3124  C   VAL c 291      10.883  15.509  97.762  1.00  0.00      chA   
ATOM   3125  O   VAL c 291      10.659  16.610  98.076  1.00  0.00      chA   
ATOM   3126  N   CYX c 292      10.531  14.465  98.522  1.00  0.00      chA   
ATOM   3127  H   CYX c 292      10.773  13.513  98.286  1.00  0.00      chA   
ATOM   3128  CA  CYX c 292       9.364  14.613  99.398  1.00  0.00      chA   
ATOM   3129  HA  CYX c 292       9.012  15.631  99.562  1.00  0.00      chA   
ATOM   3130  CB  CYX c 292       8.211  13.843  98.813  1.00  0.00      chA   
ATOM   3131  HB2 CYX c 292       8.240  12.792  99.099  1.00  0.00      chA   
ATOM   3132  HB3 CYX c 292       7.299  14.189  99.299  1.00  0.00      chA   
ATOM   3133  SG  CYX c 292       7.983  13.858  96.954  1.00  0.00      chA   
ATOM   3134  C   CYX c 292       9.678  14.259 100.904  1.00  0.00      chA   
ATOM   3135  O   CYX c 292      10.772  13.750 101.199  1.00  0.00      chA   
ATOM   3136  N   ARG c 293       8.763  14.459 101.823  1.00  0.00      chA   
ATOM   3137  H   ARG c 293       7.886  14.811 101.465  1.00  0.00      chA   
ATOM   3138  CA  ARG c 293       8.695  13.828 103.118  1.00  0.00      chA   
ATOM   3139  HA  ARG c 293       9.561  13.933 103.771  1.00  0.00      chA   
ATOM   3140  CB  ARG c 293       7.780  14.721 104.058  1.00  0.00      chA   
ATOM   3141  HB2 ARG c 293       8.284  15.688 104.080  1.00  0.00      chA   
ATOM   3142  HB3 ARG c 293       6.856  14.928 103.517  1.00  0.00      chA   
ATOM   3143  CG  ARG c 293       7.391  14.126 105.409  1.00  0.00      chA   
ATOM   3144  HG2 ARG c 293       6.741  13.253 105.344  1.00  0.00      chA   
ATOM   3145  HG3 ARG c 293       8.303  14.031 105.999  1.00  0.00      chA   
ATOM   3146  CD  ARG c 293       6.505  15.143 106.154  1.00  0.00      chA   
ATOM   3147  HD2 ARG c 293       6.919  16.148 106.219  1.00  0.00      chA   
ATOM   3148  HD3 ARG c 293       5.555  15.341 105.656  1.00  0.00      chA   
ATOM   3149  NE  ARG c 293       6.076  14.810 107.514  1.00  0.00      chA   
ATOM   3150  HE  ARG c 293       6.251  13.908 107.933  1.00  0.00      chA   
ATOM   3151  CZ  ARG c 293       5.365  15.581 108.330  1.00  0.00      chA   
ATOM   3152  NH1 ARG c 293       5.023  15.087 109.455  1.00  0.00      chA   
ATOM   3153 HH11 ARG c 293       5.452  14.204 109.691  1.00  0.00      chA   
ATOM   3154 HH12 ARG c 293       4.215  15.444 109.944  1.00  0.00      chA   
ATOM   3155  NH2 ARG c 293       4.885  16.697 108.036  1.00  0.00      chA   
ATOM   3156 HH21 ARG c 293       5.162  17.086 107.146  1.00  0.00      chA   
ATOM   3157 HH22 ARG c 293       4.258  17.195 108.652  1.00  0.00      chA   
ATOM   3158  C   ARG c 293       8.269  12.403 103.052  1.00  0.00      chA   
ATOM   3159  O   ARG c 293       7.708  11.948 102.060  1.00  0.00      chA   
ATOM   3160  N   ASP c 294       8.532  11.670 104.096  1.00  0.00      chA   
ATOM   3161  H   ASP c 294       8.979  12.129 104.877  1.00  0.00      chA   
ATOM   3162  CA  ASP c 294       7.901  10.398 104.348  1.00  0.00      chA   
ATOM   3163  HA  ASP c 294       6.945  10.404 103.824  1.00  0.00      chA   
ATOM   3164  CB  ASP c 294       8.785   9.189 103.905  1.00  0.00      chA   
ATOM   3165  HB2 ASP c 294       8.579   8.836 102.895  1.00  0.00      chA   
ATOM   3166  HB3 ASP c 294       9.842   9.405 104.059  1.00  0.00      chA   
ATOM   3167  CG  ASP c 294       8.498   7.928 104.890  1.00  0.00      chA   
ATOM   3168  OD1 ASP c 294       7.788   7.017 104.429  1.00  0.00      chA   
ATOM   3169  OD2 ASP c 294       8.931   7.960 106.063  1.00  0.00      chA   
ATOM   3170  C   ASP c 294       7.625  10.379 105.830  1.00  0.00      chA   
ATOM   3171  O   ASP c 294       8.534  10.716 106.654  1.00  0.00      chA   
ATOM   3172  N   ASN c 295       6.423  10.082 106.321  1.00  0.00      chA   
ATOM   3173  H   ASN c 295       5.743   9.795 105.633  1.00  0.00      chA   
ATOM   3174  CA  ASN c 295       5.975  10.144 107.771  1.00  0.00      chA   
ATOM   3175  HA  ASN c 295       6.769  10.722 108.245  1.00  0.00      chA   
ATOM   3176  CB  ASN c 295       4.743  11.032 107.876  1.00  0.00      chA   
ATOM   3177  HB2 ASN c 295       4.767  11.777 107.080  1.00  0.00      chA   
ATOM   3178  HB3 ASN c 295       3.827  10.472 107.690  1.00  0.00      chA   
ATOM   3179  CG  ASN c 295       4.640  11.812 109.201  1.00  0.00      chA   
ATOM   3180  OD1 ASN c 295       5.595  12.325 109.707  1.00  0.00      chA   
ATOM   3181  ND2 ASN c 295       3.429  11.999 109.678  1.00  0.00      chA   
ATOM   3182 HD21 ASN c 295       3.255  12.644 110.436  1.00  0.00      chA   
ATOM   3183 HD22 ASN c 295       2.691  11.456 109.255  1.00  0.00      chA   
ATOM   3184  C   ASN c 295       5.786   8.796 108.472  1.00  0.00      chA   
ATOM   3185  O   ASN c 295       4.973   8.754 109.374  1.00  0.00      chA   
ATOM   3186  N   TRP c 296       6.483   7.743 108.060  1.00  0.00      chA   
ATOM   3187  H   TRP c 296       7.185   8.029 107.394  1.00  0.00      chA   
ATOM   3188  CA  TRP c 296       6.196   6.310 108.353  1.00  0.00      chA   
ATOM   3189  HA  TRP c 296       5.737   6.249 109.340  1.00  0.00      chA   
ATOM   3190  CB  TRP c 296       5.304   5.678 107.227  1.00  0.00      chA   
ATOM   3191  HB2 TRP c 296       4.529   6.412 107.010  1.00  0.00      chA   
ATOM   3192  HB3 TRP c 296       5.936   5.543 106.349  1.00  0.00      chA   
ATOM   3193  CG  TRP c 296       4.565   4.412 107.510  1.00  0.00      chA   
ATOM   3194  CD1 TRP c 296       4.482   3.854 108.711  1.00  0.00      chA   
ATOM   3195  HD1 TRP c 296       4.947   4.256 109.598  1.00  0.00      chA   
ATOM   3196  NE1 TRP c 296       3.816   2.641 108.559  1.00  0.00      chA   
ATOM   3197  HE1 TRP c 296       3.565   2.047 109.336  1.00  0.00      chA   
ATOM   3198  CE2 TRP c 296       3.455   2.373 107.319  1.00  0.00      chA   
ATOM   3199  CZ2 TRP c 296       2.840   1.300 106.724  1.00  0.00      chA   
ATOM   3200  HZ2 TRP c 296       2.651   0.380 107.258  1.00  0.00      chA   
ATOM   3201  CH2 TRP c 296       2.535   1.381 105.349  1.00  0.00      chA   
ATOM   3202  HH2 TRP c 296       2.001   0.557 104.898  1.00  0.00      chA   
ATOM   3203  CZ3 TRP c 296       2.783   2.562 104.619  1.00  0.00      chA   
ATOM   3204  HZ3 TRP c 296       2.355   2.624 103.630  1.00  0.00      chA   
ATOM   3205  CE3 TRP c 296       3.548   3.593 105.198  1.00  0.00      chA   
ATOM   3206  HE3 TRP c 296       3.811   4.429 104.566  1.00  0.00      chA   
ATOM   3207  CD2 TRP c 296       3.892   3.541 106.590  1.00  0.00      chA   
ATOM   3208  C   TRP c 296       7.446   5.415 108.570  1.00  0.00      chA   
ATOM   3209  O   TRP c 296       7.370   4.492 109.433  1.00  0.00      chA   
ATOM   3210  N   HIP c 297       8.471   5.611 107.837  1.00  0.00      chA   
ATOM   3211  H   HIP c 297       8.504   6.293 107.093  1.00  0.00      chA   
ATOM   3212  CA  HIP c 297       9.626   4.660 107.786  1.00  0.00      chA   
ATOM   3213  HA  HIP c 297       9.883   4.537 108.838  1.00  0.00      chA   
ATOM   3214  CB  HIP c 297       9.116   3.354 107.186  1.00  0.00      chA   
ATOM   3215  HB2 HIP c 297       9.934   2.754 106.788  1.00  0.00      chA   
ATOM   3216  HB3 HIP c 297       8.706   2.695 107.951  1.00  0.00      chA   
ATOM   3217  CG  HIP c 297       8.134   3.410 106.009  1.00  0.00      chA   
ATOM   3218  ND1 HIP c 297       7.940   4.357 104.982  1.00  0.00      chA   
ATOM   3219  HD1 HIP c 297       8.525   5.180 105.008  1.00  0.00      chA   
ATOM   3220  CE1 HIP c 297       6.972   3.953 104.150  1.00  0.00      chA   
ATOM   3221  HE1 HIP c 297       6.706   4.392 103.200  1.00  0.00      chA   
ATOM   3222  NE2 HIP c 297       6.444   2.796 104.661  1.00  0.00      chA   
ATOM   3223  HE2 HIP c 297       5.680   2.323 104.200  1.00  0.00      chA   
ATOM   3224  CD2 HIP c 297       7.193   2.362 105.765  1.00  0.00      chA   
ATOM   3225  HD2 HIP c 297       7.022   1.472 106.354  1.00  0.00      chA   
ATOM   3226  C   HIP c 297      10.923   5.154 107.120  1.00  0.00      chA   
ATOM   3227  O   HIP c 297      10.899   5.848 106.112  1.00  0.00      chA   
ATOM   3228  N   GLY c 298      12.092   4.807 107.702  1.00  0.00      chA   
ATOM   3229  H   GLY c 298      12.005   4.408 108.627  1.00  0.00      chA   
ATOM   3230  CA  GLY c 298      13.399   5.281 107.253  1.00  0.00      chA   
ATOM   3231  HA2 GLY c 298      14.189   4.735 107.770  1.00  0.00      chA   
ATOM   3232  HA3 GLY c 298      13.483   5.060 106.189  1.00  0.00      chA   
ATOM   3233  C   GLY c 298      13.592   6.832 107.369  1.00  0.00      chA   
ATOM   3234  O   GLY c 298      12.575   7.444 107.628  1.00  0.00      chA   
ATOM   3235  N   SER c 299      14.759   7.455 107.102  1.00  0.00      chA   
ATOM   3236  H   SER c 299      15.522   6.834 106.873  1.00  0.00      chA   
ATOM   3237  CA  SER c 299      15.013   8.965 107.199  1.00  0.00      chA   
ATOM   3238  HA  SER c 299      14.075   9.516 107.116  1.00  0.00      chA   
ATOM   3239  CB  SER c 299      15.657   9.289 108.522  1.00  0.00      chA   
ATOM   3240  HB2 SER c 299      15.612  10.354 108.752  1.00  0.00      chA   
ATOM   3241  HB3 SER c 299      15.266   8.620 109.290  1.00  0.00      chA   
ATOM   3242  OG  SER c 299      17.045   9.061 108.477  1.00  0.00      chA   
ATOM   3243  HG  SER c 299      17.111   8.114 108.619  1.00  0.00      chA   
ATOM   3244  C   SER c 299      15.943   9.416 106.060  1.00  0.00      chA   
ATOM   3245  O   SER c 299      16.285  10.629 105.925  1.00  0.00      chA   
ATOM   3246  N   ASN c 300      16.327   8.562 105.149  1.00  0.00      chA   
ATOM   3247  H   ASN c 300      15.912   7.660 105.335  1.00  0.00      chA   
ATOM   3248  CA  ASN c 300      16.441   8.911 103.732  1.00  0.00      chA   
ATOM   3249  HA  ASN c 300      17.107   9.768 103.631  1.00  0.00      chA   
ATOM   3250  CB  ASN c 300      16.978   7.726 102.970  1.00  0.00      chA   
ATOM   3251  HB2 ASN c 300      16.919   7.937 101.902  1.00  0.00      chA   
ATOM   3252  HB3 ASN c 300      18.055   7.677 103.117  1.00  0.00      chA   
ATOM   3253  CG  ASN c 300      16.383   6.323 103.189  1.00  0.00      chA   
ATOM   3254  OD1 ASN c 300      15.539   6.043 103.982  1.00  0.00      chA   
ATOM   3255  ND2 ASN c 300      16.875   5.369 102.462  1.00  0.00      chA   
ATOM   3256 HD21 ASN c 300      16.551   4.412 102.474  1.00  0.00      chA   
ATOM   3257 HD22 ASN c 300      17.713   5.547 101.928  1.00  0.00      chA   
ATOM   3258  C   ASN c 300      15.094   9.394 103.056  1.00  0.00      chA   
ATOM   3259  O   ASN c 300      14.033   8.985 103.566  1.00  0.00      chA   
ATOM   3260  N   ARG c 301      15.192  10.190 101.929  1.00  0.00      chA   
ATOM   3261  H   ARG c 301      16.024  10.691 101.651  1.00  0.00      chA   
ATOM   3262  CA  ARG c 301      13.983  10.777 101.337  1.00  0.00      chA   
ATOM   3263  HA  ARG c 301      13.262  10.861 102.150  1.00  0.00      chA   
ATOM   3264  CB  ARG c 301      14.294  12.215 100.846  1.00  0.00      chA   
ATOM   3265  HB2 ARG c 301      15.238  12.297 100.307  1.00  0.00      chA   
ATOM   3266  HB3 ARG c 301      13.519  12.581 100.174  1.00  0.00      chA   
ATOM   3267  CG  ARG c 301      14.255  13.190 102.044  1.00  0.00      chA   
ATOM   3268  HG2 ARG c 301      13.378  12.894 102.620  1.00  0.00      chA   
ATOM   3269  HG3 ARG c 301      15.048  12.997 102.766  1.00  0.00      chA   
ATOM   3270  CD  ARG c 301      14.306  14.661 101.682  1.00  0.00      chA   
ATOM   3271  HD2 ARG c 301      15.243  14.998 101.237  1.00  0.00      chA   
ATOM   3272  HD3 ARG c 301      13.514  14.919 100.979  1.00  0.00      chA   
ATOM   3273  NE  ARG c 301      14.186  15.566 102.816  1.00  0.00      chA   
ATOM   3274  HE  ARG c 301      14.948  16.211 102.960  1.00  0.00      chA   
ATOM   3275  CZ  ARG c 301      13.186  15.585 103.658  1.00  0.00      chA   
ATOM   3276  NH1 ARG c 301      13.183  16.258 104.778  1.00  0.00      chA   
ATOM   3277 HH11 ARG c 301      14.060  16.585 105.157  1.00  0.00      chA   
ATOM   3278 HH12 ARG c 301      12.449  16.205 105.470  1.00  0.00      chA   
ATOM   3279  NH2 ARG c 301      11.998  15.036 103.488  1.00  0.00      chA   
ATOM   3280 HH21 ARG c 301      11.754  14.577 102.621  1.00  0.00      chA   
ATOM   3281 HH22 ARG c 301      11.250  15.211 104.144  1.00  0.00      chA   
ATOM   3282  C   ARG c 301      13.415   9.949 100.167  1.00  0.00      chA   
ATOM   3283  O   ARG c 301      14.277   9.552  99.299  1.00  0.00      chA   
ATOM   3284  N   PRO c 302      12.105   9.811  99.963  1.00  0.00      chA   
ATOM   3285  CD  PRO c 302      11.081  10.298 100.879  1.00  0.00      chA   
ATOM   3286  HD2 PRO c 302      11.214  11.354 101.118  1.00  0.00      chA   
ATOM   3287  HD3 PRO c 302      11.120   9.680 101.776  1.00  0.00      chA   
ATOM   3288  CG  PRO c 302       9.733  10.266 100.155  1.00  0.00      chA   
ATOM   3289  HG2 PRO c 302       9.542  11.267  99.770  1.00  0.00      chA   
ATOM   3290  HG3 PRO c 302       8.951   9.975 100.856  1.00  0.00      chA   
ATOM   3291  CB  PRO c 302       9.946   9.245  99.049  1.00  0.00      chA   
ATOM   3292  HB2 PRO c 302       9.190   9.347  98.269  1.00  0.00      chA   
ATOM   3293  HB3 PRO c 302       9.770   8.311  99.582  1.00  0.00      chA   
ATOM   3294  CA  PRO c 302      11.522   9.464  98.684  1.00  0.00      chA   
ATOM   3295  HA  PRO c 302      11.862   8.524  98.250  1.00  0.00      chA   
ATOM   3296  C   PRO c 302      11.596  10.605  97.619  1.00  0.00      chA   
ATOM   3297  O   PRO c 302      11.406  11.745  98.042  1.00  0.00      chA   
ATOM   3298  N   TRP c 303      11.768  10.251  96.357  1.00  0.00      chA   
ATOM   3299  H   TRP c 303      11.955   9.293  96.100  1.00  0.00      chA   
ATOM   3300  CA  TRP c 303      11.494  11.140  95.218  1.00  0.00      chA   
ATOM   3301  HA  TRP c 303      11.187  12.120  95.583  1.00  0.00      chA   
ATOM   3302  CB  TRP c 303      12.887  11.267  94.397  1.00  0.00      chA   
ATOM   3303  HB2 TRP c 303      12.767  12.072  93.671  1.00  0.00      chA   
ATOM   3304  HB3 TRP c 303      13.720  11.697  94.953  1.00  0.00      chA   
ATOM   3305  CG  TRP c 303      13.404  10.025  93.766  1.00  0.00      chA   
ATOM   3306  CD1 TRP c 303      14.491   9.322  94.194  1.00  0.00      chA   
ATOM   3307  HD1 TRP c 303      14.986   9.539  95.128  1.00  0.00      chA   
ATOM   3308  NE1 TRP c 303      14.813   8.263  93.308  1.00  0.00      chA   
ATOM   3309  HE1 TRP c 303      15.671   7.732  93.331  1.00  0.00      chA   
ATOM   3310  CE2 TRP c 303      13.982   8.278  92.240  1.00  0.00      chA   
ATOM   3311  CZ2 TRP c 303      13.893   7.518  90.986  1.00  0.00      chA   
ATOM   3312  HZ2 TRP c 303      14.546   6.672  90.840  1.00  0.00      chA   
ATOM   3313  CH2 TRP c 303      12.891   7.760  89.995  1.00  0.00      chA   
ATOM   3314  HH2 TRP c 303      12.876   7.233  89.052  1.00  0.00      chA   
ATOM   3315  CZ3 TRP c 303      11.831   8.643  90.377  1.00  0.00      chA   
ATOM   3316  HZ3 TRP c 303      11.017   8.830  89.693  1.00  0.00      chA   
ATOM   3317  CE3 TRP c 303      12.035   9.504  91.540  1.00  0.00      chA   
ATOM   3318  HE3 TRP c 303      11.370  10.354  91.558  1.00  0.00      chA   
ATOM   3319  CD2 TRP c 303      13.080   9.344  92.460  1.00  0.00      chA   
ATOM   3320  C   TRP c 303      10.372  10.591  94.342  1.00  0.00      chA   
ATOM   3321  O   TRP c 303       9.919   9.437  94.404  1.00  0.00      chA   
ATOM   3322  N   VAL c 304       9.890  11.540  93.566  1.00  0.00      chA   
ATOM   3323  H   VAL c 304      10.165  12.509  93.640  1.00  0.00      chA   
ATOM   3324  CA  VAL c 304       8.747  11.374  92.612  1.00  0.00      chA   
ATOM   3325  HA  VAL c 304       8.515  10.347  92.333  1.00  0.00      chA   
ATOM   3326  CB  VAL c 304       7.451  12.000  93.117  1.00  0.00      chA   
ATOM   3327  HB  VAL c 304       7.687  13.043  93.329  1.00  0.00      chA   
ATOM   3328  CG1 VAL c 304       6.256  11.687  92.075  1.00  0.00      chA   
ATOM   3329 HG11 VAL c 304       5.345  12.018  92.574  1.00  0.00      chA   
ATOM   3330 HG12 VAL c 304       6.280  12.346  91.207  1.00  0.00      chA   
ATOM   3331 HG13 VAL c 304       6.243  10.643  91.761  1.00  0.00      chA   
ATOM   3332  CG2 VAL c 304       6.914  11.574  94.504  1.00  0.00      chA   
ATOM   3333 HG21 VAL c 304       7.795  11.492  95.139  1.00  0.00      chA   
ATOM   3334 HG22 VAL c 304       6.236  12.360  94.837  1.00  0.00      chA   
ATOM   3335 HG23 VAL c 304       6.535  10.565  94.349  1.00  0.00      chA   
ATOM   3336  C   VAL c 304       9.066  12.187  91.378  1.00  0.00      chA   
ATOM   3337  O   VAL c 304       9.510  13.259  91.447  1.00  0.00      chA   
ATOM   3338  N   SER c 305       8.855  11.666  90.196  1.00  0.00      chA   
ATOM   3339  H   SER c 305       8.638  10.680  90.165  1.00  0.00      chA   
ATOM   3340  CA  SER c 305       9.211  12.260  88.938  1.00  0.00      chA   
ATOM   3341  HA  SER c 305       9.224  13.339  89.094  1.00  0.00      chA   
ATOM   3342  CB  SER c 305      10.595  11.714  88.511  1.00  0.00      chA   
ATOM   3343  HB2 SER c 305      10.448  10.651  88.323  1.00  0.00      chA   
ATOM   3344  HB3 SER c 305      10.796  12.248  87.583  1.00  0.00      chA   
ATOM   3345  OG  SER c 305      11.700  11.947  89.380  1.00  0.00      chA   
ATOM   3346  HG  SER c 305      12.452  11.420  89.102  1.00  0.00      chA   
ATOM   3347  C   SER c 305       8.205  11.976  87.910  1.00  0.00      chA   
ATOM   3348  O   SER c 305       7.693  10.869  87.839  1.00  0.00      chA   
ATOM   3349  N   PHE c 306       7.940  12.909  86.992  1.00  0.00      chA   
ATOM   3350  H   PHE c 306       8.424  13.791  87.071  1.00  0.00      chA   
ATOM   3351  CA  PHE c 306       6.969  12.781  85.905  1.00  0.00      chA   
ATOM   3352  HA  PHE c 306       7.113  11.797  85.458  1.00  0.00      chA   
ATOM   3353  CB  PHE c 306       5.587  12.934  86.363  1.00  0.00      chA   
ATOM   3354  HB2 PHE c 306       4.878  12.740  85.557  1.00  0.00      chA   
ATOM   3355  HB3 PHE c 306       5.512  12.093  87.054  1.00  0.00      chA   
ATOM   3356  CG  PHE c 306       5.298  14.124  87.197  1.00  0.00      chA   
ATOM   3357  CD1 PHE c 306       4.985  15.350  86.554  1.00  0.00      chA   
ATOM   3358  HD1 PHE c 306       4.748  15.423  85.503  1.00  0.00      chA   
ATOM   3359  CE1 PHE c 306       4.732  16.483  87.351  1.00  0.00      chA   
ATOM   3360  HE1 PHE c 306       4.521  17.453  86.923  1.00  0.00      chA   
ATOM   3361  CZ  PHE c 306       5.003  16.476  88.727  1.00  0.00      chA   
ATOM   3362  HZ  PHE c 306       4.755  17.341  89.325  1.00  0.00      chA   
ATOM   3363  CE2 PHE c 306       5.411  15.328  89.324  1.00  0.00      chA   
ATOM   3364  HE2 PHE c 306       5.514  15.362  90.398  1.00  0.00      chA   
ATOM   3365  CD2 PHE c 306       5.565  14.123  88.584  1.00  0.00      chA   
ATOM   3366  HD2 PHE c 306       5.787  13.243  89.169  1.00  0.00      chA   
ATOM   3367  C   PHE c 306       7.268  13.787  84.709  1.00  0.00      chA   
ATOM   3368  O   PHE c 306       8.166  14.576  84.788  1.00  0.00      chA   
ATOM   3369  N   ASN c 307       6.601  13.565  83.580  1.00  0.00      chA   
ATOM   3370  H   ASN c 307       6.115  12.684  83.507  1.00  0.00      chA   
ATOM   3371  CA  ASN c 307       6.939  14.333  82.310  1.00  0.00      chA   
ATOM   3372  HA  ASN c 307       7.750  15.024  82.545  1.00  0.00      chA   
ATOM   3373  CB  ASN c 307       7.402  13.286  81.364  1.00  0.00      chA   
ATOM   3374  HB2 ASN c 307       7.934  13.769  80.544  1.00  0.00      chA   
ATOM   3375  HB3 ASN c 307       8.150  12.691  81.888  1.00  0.00      chA   
ATOM   3376  CG  ASN c 307       6.325  12.370  80.697  1.00  0.00      chA   
ATOM   3377  OD1 ASN c 307       5.157  12.515  80.847  1.00  0.00      chA   
ATOM   3378  ND2 ASN c 307       6.819  11.521  79.844  1.00  0.00      chA   
ATOM   3379 HD21 ASN c 307       6.225  11.004  79.212  1.00  0.00      chA   
ATOM   3380 HD22 ASN c 307       7.817  11.640  79.746  1.00  0.00      chA   
ATOM   3381  C   ASN c 307       5.851  15.308  81.846  1.00  0.00      chA   
ATOM   3382  O   ASN c 307       4.946  15.471  82.647  1.00  0.00      chA   
ATOM   3383  N   GLN c 308       5.890  15.935  80.689  1.00  0.00      chA   
ATOM   3384  H   GLN c 308       6.537  15.588  79.995  1.00  0.00      chA   
ATOM   3385  CA  GLN c 308       4.816  16.819  80.399  1.00  0.00      chA   
ATOM   3386  HA  GLN c 308       4.674  17.326  81.353  1.00  0.00      chA   
ATOM   3387  CB  GLN c 308       5.075  17.811  79.314  1.00  0.00      chA   
ATOM   3388  HB2 GLN c 308       5.112  17.312  78.345  1.00  0.00      chA   
ATOM   3389  HB3 GLN c 308       4.212  18.453  79.144  1.00  0.00      chA   
ATOM   3390  CG  GLN c 308       6.343  18.697  79.542  1.00  0.00      chA   
ATOM   3391  HG2 GLN c 308       5.982  19.534  80.140  1.00  0.00      chA   
ATOM   3392  HG3 GLN c 308       7.082  18.165  80.140  1.00  0.00      chA   
ATOM   3393  CD  GLN c 308       6.942  19.128  78.265  1.00  0.00      chA   
ATOM   3394  OE1 GLN c 308       6.559  20.143  77.706  1.00  0.00      chA   
ATOM   3395  NE2 GLN c 308       7.963  18.435  77.806  1.00  0.00      chA   
ATOM   3396 HE21 GLN c 308       8.344  18.678  76.902  1.00  0.00      chA   
ATOM   3397 HE22 GLN c 308       8.313  17.619  78.288  1.00  0.00      chA   
ATOM   3398  C   GLN c 308       3.524  16.063  80.176  1.00  0.00      chA   
ATOM   3399  O   GLN c 308       2.476  16.651  80.559  1.00  0.00      chA   
ATOM   3400  N   ASN c 309       3.592  14.856  79.588  1.00  0.00      chA   
ATOM   3401  H   ASN c 309       4.446  14.400  79.300  1.00  0.00      chA   
ATOM   3402  CA  ASN c 309       2.292  14.072  79.472  1.00  0.00      chA   
ATOM   3403  HA  ASN c 309       1.464  14.729  79.206  1.00  0.00      chA   
ATOM   3404  CB  ASN c 309       2.503  13.164  78.307  1.00  0.00      chA   
ATOM   3405  HB2 ASN c 309       2.717  13.659  77.361  1.00  0.00      chA   
ATOM   3406  HB3 ASN c 309       3.273  12.409  78.470  1.00  0.00      chA   
ATOM   3407  CG  ASN c 309       1.238  12.470  78.025  1.00  0.00      chA   
ATOM   3408  OD1 ASN c 309       0.271  13.094  77.794  1.00  0.00      chA   
ATOM   3409  ND2 ASN c 309       1.166  11.162  78.133  1.00  0.00      chA   
ATOM   3410 HD21 ASN c 309       0.337  10.652  77.863  1.00  0.00      chA   
ATOM   3411 HD22 ASN c 309       1.992  10.601  78.289  1.00  0.00      chA   
ATOM   3412  C   ASN c 309       1.906  13.367  80.826  1.00  0.00      chA   
ATOM   3413  O   ASN c 309       1.197  12.381  80.813  1.00  0.00      chA   
ATOM   3414  N   LEU c 310       2.446  13.758  82.016  1.00  0.00      chA   
ATOM   3415  H   LEU c 310       3.255  14.355  81.910  1.00  0.00      chA   
ATOM   3416  CA  LEU c 310       2.172  13.169  83.405  1.00  0.00      chA   
ATOM   3417  HA  LEU c 310       2.907  13.674  84.033  1.00  0.00      chA   
ATOM   3418  CB  LEU c 310       0.762  13.543  83.811  1.00  0.00      chA   
ATOM   3419  HB2 LEU c 310       0.482  14.507  83.387  1.00  0.00      chA   
ATOM   3420  HB3 LEU c 310       0.231  12.747  83.290  1.00  0.00      chA   
ATOM   3421  CG  LEU c 310       0.546  13.720  85.314  1.00  0.00      chA   
ATOM   3422  HG  LEU c 310       0.639  12.726  85.749  1.00  0.00      chA   
ATOM   3423  CD1 LEU c 310       1.397  14.664  86.008  1.00  0.00      chA   
ATOM   3424 HD11 LEU c 310       1.010  14.865  87.007  1.00  0.00      chA   
ATOM   3425 HD12 LEU c 310       2.439  14.347  86.061  1.00  0.00      chA   
ATOM   3426 HD13 LEU c 310       1.464  15.630  85.507  1.00  0.00      chA   
ATOM   3427  CD2 LEU c 310      -0.957  14.009  85.509  1.00  0.00      chA   
ATOM   3428 HD21 LEU c 310      -1.155  14.978  85.051  1.00  0.00      chA   
ATOM   3429 HD22 LEU c 310      -1.459  13.200  84.978  1.00  0.00      chA   
ATOM   3430 HD23 LEU c 310      -1.190  13.815  86.557  1.00  0.00      chA   
ATOM   3431  C   LEU c 310       2.595  11.697  83.671  1.00  0.00      chA   
ATOM   3432  O   LEU c 310       2.172  10.952  84.547  1.00  0.00      chA   
ATOM   3433  N   GLU c 311       3.435  11.098  82.741  1.00  0.00      chA   
ATOM   3434  H   GLU c 311       3.828  11.663  82.001  1.00  0.00      chA   
ATOM   3435  CA  GLU c 311       3.984   9.743  82.762  1.00  0.00      chA   
ATOM   3436  HA  GLU c 311       3.193   9.156  83.229  1.00  0.00      chA   
ATOM   3437  CB  GLU c 311       4.126   9.338  81.308  1.00  0.00      chA   
ATOM   3438  HB2 GLU c 311       4.764  10.006  80.731  1.00  0.00      chA   
ATOM   3439  HB3 GLU c 311       4.772   8.463  81.232  1.00  0.00      chA   
ATOM   3440  CG  GLU c 311       2.828   8.903  80.651  1.00  0.00      chA   
ATOM   3441  HG2 GLU c 311       2.326   8.089  81.174  1.00  0.00      chA   
ATOM   3442  HG3 GLU c 311       2.148   9.752  80.579  1.00  0.00      chA   
ATOM   3443  CD  GLU c 311       2.992   8.628  79.166  1.00  0.00      chA   
ATOM   3444  OE1 GLU c 311       3.298   9.577  78.439  1.00  0.00      chA   
ATOM   3445  OE2 GLU c 311       2.812   7.489  78.684  1.00  0.00      chA   
ATOM   3446  C   GLU c 311       5.211   9.566  83.685  1.00  0.00      chA   
ATOM   3447  O   GLU c 311       6.178  10.366  83.520  1.00  0.00      chA   
ATOM   3448  N   TYR c 312       5.124   8.734  84.695  1.00  0.00      chA   
ATOM   3449  H   TYR c 312       4.370   8.064  84.629  1.00  0.00      chA   
ATOM   3450  CA  TYR c 312       5.697   9.005  85.968  1.00  0.00      chA   
ATOM   3451  HA  TYR c 312       6.300   9.912  85.963  1.00  0.00      chA   
ATOM   3452  CB  TYR c 312       4.516   9.308  86.901  1.00  0.00      chA   
ATOM   3453  HB2 TYR c 312       4.994   9.678  87.809  1.00  0.00      chA   
ATOM   3454  HB3 TYR c 312       4.007  10.197  86.530  1.00  0.00      chA   
ATOM   3455  CG  TYR c 312       3.632   8.173  87.323  1.00  0.00      chA   
ATOM   3456  CD1 TYR c 312       4.024   7.334  88.413  1.00  0.00      chA   
ATOM   3457  HD1 TYR c 312       5.016   7.443  88.826  1.00  0.00      chA   
ATOM   3458  CE1 TYR c 312       3.109   6.345  88.837  1.00  0.00      chA   
ATOM   3459  HE1 TYR c 312       3.353   5.694  89.663  1.00  0.00      chA   
ATOM   3460  CZ  TYR c 312       1.938   6.139  88.090  1.00  0.00      chA   
ATOM   3461  OH  TYR c 312       1.107   5.088  88.417  1.00  0.00      chA   
ATOM   3462  HH  TYR c 312       1.410   4.645  89.213  1.00  0.00      chA   
ATOM   3463  CE2 TYR c 312       1.536   6.985  87.073  1.00  0.00      chA   
ATOM   3464  HE2 TYR c 312       0.516   6.860  86.742  1.00  0.00      chA   
ATOM   3465  CD2 TYR c 312       2.378   8.012  86.670  1.00  0.00      chA   
ATOM   3466  HD2 TYR c 312       2.108   8.643  85.836  1.00  0.00      chA   
ATOM   3467  C   TYR c 312       6.470   7.896  86.577  1.00  0.00      chA   
ATOM   3468  O   TYR c 312       6.411   6.742  86.074  1.00  0.00      chA   
ATOM   3469  N   GLN c 313       7.185   8.150  87.657  1.00  0.00      chA   
ATOM   3470  H   GLN c 313       7.188   9.100  87.998  1.00  0.00      chA   
ATOM   3471  CA  GLN c 313       7.990   7.142  88.351  1.00  0.00      chA   
ATOM   3472  HA  GLN c 313       7.282   6.346  88.585  1.00  0.00      chA   
ATOM   3473  CB  GLN c 313       9.103   6.508  87.496  1.00  0.00      chA   
ATOM   3474  HB2 GLN c 313       9.651   5.792  88.106  1.00  0.00      chA   
ATOM   3475  HB3 GLN c 313       8.633   5.873  86.744  1.00  0.00      chA   
ATOM   3476  CG  GLN c 313      10.140   7.347  86.771  1.00  0.00      chA   
ATOM   3477  HG2 GLN c 313       9.634   8.236  86.397  1.00  0.00      chA   
ATOM   3478  HG3 GLN c 313      10.848   7.768  87.486  1.00  0.00      chA   
ATOM   3479  CD  GLN c 313      10.850   6.703  85.610  1.00  0.00      chA   
ATOM   3480  OE1 GLN c 313      11.118   5.483  85.643  1.00  0.00      chA   
ATOM   3481  NE2 GLN c 313      10.973   7.319  84.458  1.00  0.00      chA   
ATOM   3482 HE21 GLN c 313      11.074   6.889  83.550  1.00  0.00      chA   
ATOM   3483 HE22 GLN c 313      10.827   8.308  84.326  1.00  0.00      chA   
ATOM   3484  C   GLN c 313       8.505   7.639  89.717  1.00  0.00      chA   
ATOM   3485  O   GLN c 313       8.526   8.796  90.008  1.00  0.00      chA   
ATOM   3486  N   ILE c 314       8.946   6.666  90.486  1.00  0.00      chA   
ATOM   3487  H   ILE c 314       9.126   5.734  90.141  1.00  0.00      chA   
ATOM   3488  CA  ILE c 314       9.249   6.884  91.843  1.00  0.00      chA   
ATOM   3489  HA  ILE c 314       9.362   7.950  92.043  1.00  0.00      chA   
ATOM   3490  CB  ILE c 314       8.013   6.409  92.648  1.00  0.00      chA   
ATOM   3491  HB  ILE c 314       8.167   6.516  93.722  1.00  0.00      chA   
ATOM   3492  CG2 ILE c 314       6.907   7.377  92.335  1.00  0.00      chA   
ATOM   3493 HG21 ILE c 314       7.425   8.335  92.389  1.00  0.00      chA   
ATOM   3494 HG22 ILE c 314       6.381   7.335  91.380  1.00  0.00      chA   
ATOM   3495 HG23 ILE c 314       6.174   7.449  93.138  1.00  0.00      chA   
ATOM   3496  CG1 ILE c 314       7.500   4.951  92.392  1.00  0.00      chA   
ATOM   3497 HG12 ILE c 314       7.507   4.781  91.315  1.00  0.00      chA   
ATOM   3498 HG13 ILE c 314       8.171   4.190  92.793  1.00  0.00      chA   
ATOM   3499  CD1 ILE c 314       6.126   4.597  92.946  1.00  0.00      chA   
ATOM   3500 HD11 ILE c 314       6.301   4.372  93.998  1.00  0.00      chA   
ATOM   3501 HD12 ILE c 314       5.320   5.324  92.846  1.00  0.00      chA   
ATOM   3502 HD13 ILE c 314       5.842   3.705  92.387  1.00  0.00      chA   
ATOM   3503  C   ILE c 314      10.470   6.153  92.335  1.00  0.00      chA   
ATOM   3504  O   ILE c 314      10.913   5.164  91.733  1.00  0.00      chA   
ATOM   3505  N   GLY c 315      11.034   6.667  93.395  1.00  0.00      chA   
ATOM   3506  H   GLY c 315      10.673   7.547  93.734  1.00  0.00      chA   
ATOM   3507  CA  GLY c 315      12.169   6.046  94.084  1.00  0.00      chA   
ATOM   3508  HA2 GLY c 315      11.945   4.989  94.228  1.00  0.00      chA   
ATOM   3509  HA3 GLY c 315      13.146   6.140  93.610  1.00  0.00      chA   
ATOM   3510  C   GLY c 315      12.472   6.636  95.429  1.00  0.00      chA   
ATOM   3511  O   GLY c 315      11.681   7.403  95.962  1.00  0.00      chA   
ATOM   3512  N   TYR c 316      13.582   6.231  96.009  1.00  0.00      chA   
ATOM   3513  H   TYR c 316      14.218   5.746  95.393  1.00  0.00      chA   
ATOM   3514  CA  TYR c 316      14.239   6.691  97.240  1.00  0.00      chA   
ATOM   3515  HA  TYR c 316      13.705   7.569  97.604  1.00  0.00      chA   
ATOM   3516  CB  TYR c 316      14.091   5.576  98.276  1.00  0.00      chA   
ATOM   3517  HB2 TYR c 316      13.770   4.640  97.820  1.00  0.00      chA   
ATOM   3518  HB3 TYR c 316      15.064   5.520  98.764  1.00  0.00      chA   
ATOM   3519  CG  TYR c 316      13.112   5.916  99.373  1.00  0.00      chA   
ATOM   3520  CD1 TYR c 316      11.709   5.816  99.246  1.00  0.00      chA   
ATOM   3521  HD1 TYR c 316      11.335   5.446  98.303  1.00  0.00      chA   
ATOM   3522  CE1 TYR c 316      10.875   6.001 100.297  1.00  0.00      chA   
ATOM   3523  HE1 TYR c 316       9.816   5.960 100.090  1.00  0.00      chA   
ATOM   3524  CZ  TYR c 316      11.351   6.512 101.496  1.00  0.00      chA   
ATOM   3525  OH  TYR c 316      10.516   6.883 102.495  1.00  0.00      chA   
ATOM   3526  HH  TYR c 316       9.611   6.785 102.190  1.00  0.00      chA   
ATOM   3527  CE2 TYR c 316      12.754   6.580 101.672  1.00  0.00      chA   
ATOM   3528  HE2 TYR c 316      13.102   7.122 102.539  1.00  0.00      chA   
ATOM   3529  CD2 TYR c 316      13.652   6.366 100.621  1.00  0.00      chA   
ATOM   3530  HD2 TYR c 316      14.664   6.597 100.916  1.00  0.00      chA   
ATOM   3531  C   TYR c 316      15.662   7.107  97.104  1.00  0.00      chA   
ATOM   3532  O   TYR c 316      16.407   6.475  96.376  1.00  0.00      chA   
ATOM   3533  N   ILE c 317      16.030   8.196  97.723  1.00  0.00      chA   
ATOM   3534  H   ILE c 317      15.323   8.640  98.293  1.00  0.00      chA   
ATOM   3535  CA  ILE c 317      17.396   8.787  97.661  1.00  0.00      chA   
ATOM   3536  HA  ILE c 317      17.648   8.971  96.616  1.00  0.00      chA   
ATOM   3537  CB  ILE c 317      17.433  10.159  98.385  1.00  0.00      chA   
ATOM   3538  HB  ILE c 317      16.897  10.120  99.335  1.00  0.00      chA   
ATOM   3539  CG2 ILE c 317      18.936  10.609  98.467  1.00  0.00      chA   
ATOM   3540 HG21 ILE c 317      19.353  10.885  97.497  1.00  0.00      chA   
ATOM   3541 HG22 ILE c 317      19.022  11.496  99.095  1.00  0.00      chA   
ATOM   3542 HG23 ILE c 317      19.377   9.741  98.956  1.00  0.00      chA   
ATOM   3543  CG1 ILE c 317      16.575  11.197  97.648  1.00  0.00      chA   
ATOM   3544 HG12 ILE c 317      15.580  10.753  97.604  1.00  0.00      chA   
ATOM   3545 HG13 ILE c 317      16.489  12.054  98.315  1.00  0.00      chA   
ATOM   3546  CD1 ILE c 317      17.033  11.820  96.250  1.00  0.00      chA   
ATOM   3547 HD11 ILE c 317      17.206  10.900  95.692  1.00  0.00      chA   
ATOM   3548 HD12 ILE c 317      16.209  12.300  95.722  1.00  0.00      chA   
ATOM   3549 HD13 ILE c 317      17.905  12.454  96.411  1.00  0.00      chA   
ATOM   3550  C   ILE c 317      18.366   7.776  98.186  1.00  0.00      chA   
ATOM   3551  O   ILE c 317      18.371   7.585  99.360  1.00  0.00      chA   
ATOM   3552  N   CYX c 318      19.230   7.211  97.349  1.00  0.00      chA   
ATOM   3553  H   CYX c 318      19.179   7.278  96.343  1.00  0.00      chA   
ATOM   3554  CA  CYX c 318      20.242   6.149  97.750  1.00  0.00      chA   
ATOM   3555  HA  CYX c 318      19.686   5.421  98.339  1.00  0.00      chA   
ATOM   3556  CB  CYX c 318      20.753   5.303  96.608  1.00  0.00      chA   
ATOM   3557  HB2 CYX c 318      21.405   5.975  96.048  1.00  0.00      chA   
ATOM   3558  HB3 CYX c 318      21.233   4.414  97.017  1.00  0.00      chA   
ATOM   3559  SG  CYX c 318      19.413   4.742  95.424  1.00  0.00      chA   
ATOM   3560  C   CYX c 318      21.394   6.686  98.662  1.00  0.00      chA   
ATOM   3561  O   CYX c 318      21.976   5.850  99.398  1.00  0.00      chA   
ATOM   3562  N   SER c 319      21.777   8.016  98.583  1.00  0.00      chA   
ATOM   3563  H   SER c 319      21.392   8.603  97.856  1.00  0.00      chA   
ATOM   3564  CA  SER c 319      22.899   8.629  99.398  1.00  0.00      chA   
ATOM   3565  HA  SER c 319      23.830   8.561  98.834  1.00  0.00      chA   
ATOM   3566  CB  SER c 319      22.498  10.101  99.474  1.00  0.00      chA   
ATOM   3567  HB2 SER c 319      21.507  10.208  99.915  1.00  0.00      chA   
ATOM   3568  HB3 SER c 319      23.206  10.599 100.136  1.00  0.00      chA   
ATOM   3569  OG  SER c 319      22.515  10.786  98.257  1.00  0.00      chA   
ATOM   3570  HG  SER c 319      23.439  10.798  97.993  1.00  0.00      chA   
ATOM   3571  C   SER c 319      23.136   8.050 100.798  1.00  0.00      chA   
ATOM   3572  O   SER c 319      22.152   7.808 101.515  1.00  0.00      chA   
ATOM   3573  N   GLY c 320      24.435   7.830 101.133  1.00  0.00      chA   
ATOM   3574  H   GLY c 320      25.117   7.968 100.400  1.00  0.00      chA   
ATOM   3575  CA  GLY c 320      24.895   7.341 102.408  1.00  0.00      chA   
ATOM   3576  HA2 GLY c 320      24.235   6.508 102.649  1.00  0.00      chA   
ATOM   3577  HA3 GLY c 320      25.888   6.929 102.229  1.00  0.00      chA   
ATOM   3578  C   GLY c 320      24.862   8.363 103.502  1.00  0.00      chA   
ATOM   3579  O   GLY c 320      25.813   8.394 104.288  1.00  0.00      chA   
ATOM   3580  N   VAL c 321      23.810   9.182 103.566  1.00  0.00      chA   
ATOM   3581  H   VAL c 321      23.027   8.986 102.958  1.00  0.00      chA   
ATOM   3582  CA  VAL c 321      23.719  10.368 104.351  1.00  0.00      chA   
ATOM   3583  HA  VAL c 321      24.115  10.211 105.353  1.00  0.00      chA   
ATOM   3584  CB  VAL c 321      24.305  11.672 103.709  1.00  0.00      chA   
ATOM   3585  HB  VAL c 321      23.974  12.563 104.244  1.00  0.00      chA   
ATOM   3586  CG1 VAL c 321      25.823  11.544 103.799  1.00  0.00      chA   
ATOM   3587 HG11 VAL c 321      26.202  10.766 103.138  1.00  0.00      chA   
ATOM   3588 HG12 VAL c 321      26.275  12.456 103.409  1.00  0.00      chA   
ATOM   3589 HG13 VAL c 321      26.080  11.459 104.855  1.00  0.00      chA   
ATOM   3590  CG2 VAL c 321      24.097  11.866 102.190  1.00  0.00      chA   
ATOM   3591 HG21 VAL c 321      23.049  12.042 101.952  1.00  0.00      chA   
ATOM   3592 HG22 VAL c 321      24.577  12.794 101.877  1.00  0.00      chA   
ATOM   3593 HG23 VAL c 321      24.471  11.005 101.635  1.00  0.00      chA   
ATOM   3594  C   VAL c 321      22.172  10.519 104.504  1.00  0.00      chA   
ATOM   3595  O   VAL c 321      21.444  10.079 103.613  1.00  0.00      chA   
ATOM   3596  N   PHE c 322      21.598  11.281 105.503  1.00  0.00      chA   
ATOM   3597  H   PHE c 322      22.088  11.904 106.130  1.00  0.00      chA   
ATOM   3598  CA  PHE c 322      20.130  11.394 105.670  1.00  0.00      chA   
ATOM   3599  HA  PHE c 322      19.666  11.001 104.766  1.00  0.00      chA   
ATOM   3600  CB  PHE c 322      19.748  10.628 106.974  1.00  0.00      chA   
ATOM   3601  HB2 PHE c 322      20.426  10.831 107.802  1.00  0.00      chA   
ATOM   3602  HB3 PHE c 322      18.694  10.703 107.248  1.00  0.00      chA   
ATOM   3603  CG  PHE c 322      20.012   9.165 106.749  1.00  0.00      chA   
ATOM   3604  CD1 PHE c 322      20.474   8.483 107.883  1.00  0.00      chA   
ATOM   3605  HD1 PHE c 322      20.778   9.020 108.769  1.00  0.00      chA   
ATOM   3606  CE1 PHE c 322      20.533   7.094 107.870  1.00  0.00      chA   
ATOM   3607  HE1 PHE c 322      20.883   6.587 108.757  1.00  0.00      chA   
ATOM   3608  CZ  PHE c 322      20.232   6.392 106.721  1.00  0.00      chA   
ATOM   3609  HZ  PHE c 322      20.475   5.347 106.597  1.00  0.00      chA   
ATOM   3610  CE2 PHE c 322      19.755   7.058 105.545  1.00  0.00      chA   
ATOM   3611  HE2 PHE c 322      19.434   6.526 104.663  1.00  0.00      chA   
ATOM   3612  CD2 PHE c 322      19.597   8.415 105.580  1.00  0.00      chA   
ATOM   3613  HD2 PHE c 322      19.175   8.893 104.708  1.00  0.00      chA   
ATOM   3614  C   PHE c 322      19.650  12.797 105.645  1.00  0.00      chA   
ATOM   3615  O   PHE c 322      20.408  13.768 105.632  1.00  0.00      chA   
ATOM   3616  N   GLY c 323      18.320  12.963 105.763  1.00  0.00      chA   
ATOM   3617  H   GLY c 323      17.739  12.154 105.603  1.00  0.00      chA   
ATOM   3618  CA  GLY c 323      17.730  14.344 105.655  1.00  0.00      chA   
ATOM   3619  HA2 GLY c 323      18.237  15.000 106.363  1.00  0.00      chA   
ATOM   3620  HA3 GLY c 323      17.903  14.669 104.628  1.00  0.00      chA   
ATOM   3621  C   GLY c 323      16.257  14.590 105.973  1.00  0.00      chA   
ATOM   3622  O   GLY c 323      15.809  15.721 105.770  1.00  0.00      chA   
ATOM   3623  N   ASP c 324      15.626  13.703 106.713  1.00  0.00      chA   
ATOM   3624  H   ASP c 324      16.105  12.832 106.891  1.00  0.00      chA   
ATOM   3625  CA  ASP c 324      14.181  13.667 107.079  1.00  0.00      chA   
ATOM   3626  HA  ASP c 324      13.732  14.650 106.934  1.00  0.00      chA   
ATOM   3627  CB  ASP c 324      13.451  12.789 106.076  1.00  0.00      chA   
ATOM   3628  HB2 ASP c 324      13.502  13.013 105.010  1.00  0.00      chA   
ATOM   3629  HB3 ASP c 324      13.937  11.819 106.175  1.00  0.00      chA   
ATOM   3630  CG  ASP c 324      11.988  12.587 106.401  1.00  0.00      chA   
ATOM   3631  OD1 ASP c 324      11.445  11.469 106.624  1.00  0.00      chA   
ATOM   3632  OD2 ASP c 324      11.291  13.634 106.441  1.00  0.00      chA   
ATOM   3633  C   ASP c 324      13.983  13.437 108.644  1.00  0.00      chA   
ATOM   3634  O   ASP c 324      14.001  12.267 109.005  1.00  0.00      chA   
ATOM   3635  N   ASN c 325      14.048  14.444 109.475  1.00  0.00      chA   
ATOM   3636  H   ASN c 325      14.151  15.373 109.091  1.00  0.00      chA   
ATOM   3637  CA  ASN c 325      14.184  14.412 110.839  1.00  0.00      chA   
ATOM   3638  HA  ASN c 325      15.107  13.877 111.060  1.00  0.00      chA   
ATOM   3639  CB  ASN c 325      14.528  15.775 111.356  1.00  0.00      chA   
ATOM   3640  HB2 ASN c 325      13.969  16.546 110.828  1.00  0.00      chA   
ATOM   3641  HB3 ASN c 325      14.097  15.826 112.356  1.00  0.00      chA   
ATOM   3642  CG  ASN c 325      15.957  16.148 111.371  1.00  0.00      chA   
ATOM   3643  OD1 ASN c 325      16.696  15.694 110.490  1.00  0.00      chA   
ATOM   3644  ND2 ASN c 325      16.472  16.976 112.221  1.00  0.00      chA   
ATOM   3645 HD21 ASN c 325      17.472  17.118 112.224  1.00  0.00      chA   
ATOM   3646 HD22 ASN c 325      15.934  17.634 112.767  1.00  0.00      chA   
ATOM   3647  C   ASN c 325      12.981  13.930 111.653  1.00  0.00      chA   
ATOM   3648  O   ASN c 325      11.880  14.317 111.318  1.00  0.00      chA   
ATOM   3649  N   PRO c 326      13.081  13.262 112.845  1.00  0.00      chA   
ATOM   3650  CD  PRO c 326      11.873  13.070 113.737  1.00  0.00      chA   
ATOM   3651  HD2 PRO c 326      11.049  12.652 113.160  1.00  0.00      chA   
ATOM   3652  HD3 PRO c 326      11.573  14.050 114.109  1.00  0.00      chA   
ATOM   3653  CG  PRO c 326      12.317  12.078 114.844  1.00  0.00      chA   
ATOM   3654  HG2 PRO c 326      12.163  11.121 114.346  1.00  0.00      chA   
ATOM   3655  HG3 PRO c 326      11.723  12.151 115.755  1.00  0.00      chA   
ATOM   3656  CB  PRO c 326      13.787  12.506 114.979  1.00  0.00      chA   
ATOM   3657  HB2 PRO c 326      14.387  11.763 115.502  1.00  0.00      chA   
ATOM   3658  HB3 PRO c 326      13.906  13.349 115.660  1.00  0.00      chA   
ATOM   3659  CA  PRO c 326      14.236  12.843 113.539  1.00  0.00      chA   
ATOM   3660  HA  PRO c 326      14.955  13.657 113.631  1.00  0.00      chA   
ATOM   3661  C   PRO c 326      14.939  11.604 112.872  1.00  0.00      chA   
ATOM   3662  O   PRO c 326      14.261  10.688 112.292  1.00  0.00      chA   
ATOM   3663  N   ARG c 327      16.294  11.454 112.965  1.00  0.00      chA   
ATOM   3664  H   ARG c 327      16.737  12.102 113.600  1.00  0.00      chA   
ATOM   3665  CA  ARG c 327      17.060  10.449 112.217  1.00  0.00      chA   
ATOM   3666  HA  ARG c 327      16.394   9.622 111.966  1.00  0.00      chA   
ATOM   3667  CB  ARG c 327      17.546  11.020 110.839  1.00  0.00      chA   
ATOM   3668  HB2 ARG c 327      18.072  10.248 110.278  1.00  0.00      chA   
ATOM   3669  HB3 ARG c 327      16.680  11.366 110.274  1.00  0.00      chA   
ATOM   3670  CG  ARG c 327      18.398  12.257 111.014  1.00  0.00      chA   
ATOM   3671  HG2 ARG c 327      17.885  12.958 111.672  1.00  0.00      chA   
ATOM   3672  HG3 ARG c 327      19.356  11.953 111.435  1.00  0.00      chA   
ATOM   3673  CD  ARG c 327      18.614  12.960 109.707  1.00  0.00      chA   
ATOM   3674  HD2 ARG c 327      18.321  12.235 108.948  1.00  0.00      chA   
ATOM   3675  HD3 ARG c 327      17.836  13.722 109.741  1.00  0.00      chA   
ATOM   3676  NE  ARG c 327      19.932  13.580 109.496  1.00  0.00      chA   
ATOM   3677  HE  ARG c 327      20.760  13.001 109.458  1.00  0.00      chA   
ATOM   3678  CZ  ARG c 327      20.176  14.867 109.277  1.00  0.00      chA   
ATOM   3679  NH1 ARG c 327      21.353  15.217 108.936  1.00  0.00      chA   
ATOM   3680 HH11 ARG c 327      22.043  14.481 108.927  1.00  0.00      chA   
ATOM   3681 HH12 ARG c 327      21.679  16.173 108.967  1.00  0.00      chA   
ATOM   3682  NH2 ARG c 327      19.331  15.809 109.451  1.00  0.00      chA   
ATOM   3683 HH21 ARG c 327      18.431  15.601 109.859  1.00  0.00      chA   
ATOM   3684 HH22 ARG c 327      19.649  16.764 109.378  1.00  0.00      chA   
ATOM   3685  C   ARG c 327      18.269   9.941 113.032  1.00  0.00      chA   
ATOM   3686  O   ARG c 327      18.615  10.688 113.967  1.00  0.00      chA   
ATOM   3687  N   PRO c 328      18.828   8.810 112.673  1.00  0.00      chA   
ATOM   3688  CD  PRO c 328      18.341   7.708 111.886  1.00  0.00      chA   
ATOM   3689  HD2 PRO c 328      18.005   8.042 110.904  1.00  0.00      chA   
ATOM   3690  HD3 PRO c 328      17.576   7.106 112.376  1.00  0.00      chA   
ATOM   3691  CG  PRO c 328      19.498   6.852 111.610  1.00  0.00      chA   
ATOM   3692  HG2 PRO c 328      20.018   7.240 110.733  1.00  0.00      chA   
ATOM   3693  HG3 PRO c 328      19.140   5.832 111.471  1.00  0.00      chA   
ATOM   3694  CB  PRO c 328      20.358   7.020 112.829  1.00  0.00      chA   
ATOM   3695  HB2 PRO c 328      21.407   6.779 112.656  1.00  0.00      chA   
ATOM   3696  HB3 PRO c 328      20.011   6.415 113.666  1.00  0.00      chA   
ATOM   3697  CA  PRO c 328      20.159   8.509 113.103  1.00  0.00      chA   
ATOM   3698  HA  PRO c 328      20.229   8.695 114.175  1.00  0.00      chA   
ATOM   3699  C   PRO c 328      21.142   9.401 112.290  1.00  0.00      chA   
ATOM   3700  O   PRO c 328      20.796  10.064 111.312  1.00  0.00      chA   
ATOM   3701  N   ASN c 329      22.383   9.346 112.737  1.00  0.00      chA   
ATOM   3702  H   ASN c 329      22.510   8.891 113.631  1.00  0.00      chA   
ATOM   3703  CA  ASN c 329      23.464  10.066 112.108  1.00  0.00      chA   
ATOM   3704  HA  ASN c 329      23.247  11.133 112.069  1.00  0.00      chA   
ATOM   3705  CB  ASN c 329      24.682   9.979 113.092  1.00  0.00      chA   
ATOM   3706  HB2 ASN c 329      24.341   9.808 114.114  1.00  0.00      chA   
ATOM   3707  HB3 ASN c 329      25.284   9.165 112.689  1.00  0.00      chA   
ATOM   3708  CG  ASN c 329      25.601  11.179 113.064  1.00  0.00      chA   
ATOM   3709  OD1 ASN c 329      25.139  12.309 113.273  1.00  0.00      chA   
ATOM   3710  ND2 ASN c 329      26.883  10.913 112.829  1.00  0.00      chA   
ATOM   3711 HD21 ASN c 329      27.671  11.538 112.728  1.00  0.00      chA   
ATOM   3712 HD22 ASN c 329      26.997   9.911 112.859  1.00  0.00      chA   
ATOM   3713  C   ASN c 329      23.729   9.678 110.604  1.00  0.00      chA   
ATOM   3714  O   ASN c 329      23.489   8.535 110.160  1.00  0.00      chA   
ATOM   3715  N   ASP c 330      24.504  10.526 109.895  1.00  0.00      chA   
ATOM   3716  H   ASP c 330      24.578  11.468 110.255  1.00  0.00      chA   
ATOM   3717  CA  ASP c 330      25.163  10.150 108.657  1.00  0.00      chA   
ATOM   3718  HA  ASP c 330      24.347   9.887 107.983  1.00  0.00      chA   
ATOM   3719  CB  ASP c 330      25.912  11.288 107.986  1.00  0.00      chA   
ATOM   3720  HB2 ASP c 330      26.679  11.670 108.659  1.00  0.00      chA   
ATOM   3721  HB3 ASP c 330      26.464  10.802 107.182  1.00  0.00      chA   
ATOM   3722  CG  ASP c 330      25.242  12.451 107.349  1.00  0.00      chA   
ATOM   3723  OD1 ASP c 330      25.823  13.571 107.279  1.00  0.00      chA   
ATOM   3724  OD2 ASP c 330      24.100  12.354 106.873  1.00  0.00      chA   
ATOM   3725  C   ASP c 330      26.092   8.942 108.953  1.00  0.00      chA   
ATOM   3726  O   ASP c 330      27.043   8.962 109.743  1.00  0.00      chA   
ATOM   3727  N   GLY c 331      25.904   7.800 108.210  1.00  0.00      chA   
ATOM   3728  H   GLY c 331      25.076   7.863 107.635  1.00  0.00      chA   
ATOM   3729  CA  GLY c 331      26.768   6.638 108.123  1.00  0.00      chA   
ATOM   3730  HA2 GLY c 331      27.617   6.942 107.511  1.00  0.00      chA   
ATOM   3731  HA3 GLY c 331      27.273   6.357 109.047  1.00  0.00      chA   
ATOM   3732  C   GLY c 331      26.258   5.346 107.553  1.00  0.00      chA   
ATOM   3733  O   GLY c 331      26.839   4.286 107.624  1.00  0.00      chA   
ATOM   3734  N   THR c 332      25.096   5.412 106.990  1.00  0.00      chA   
ATOM   3735  H   THR c 332      24.598   6.287 107.064  1.00  0.00      chA   
ATOM   3736  CA  THR c 332      24.431   4.292 106.186  1.00  0.00      chA   
ATOM   3737  HA  THR c 332      25.305   3.763 105.806  1.00  0.00      chA   
ATOM   3738  CB  THR c 332      23.519   3.313 107.107  1.00  0.00      chA   
ATOM   3739  HB  THR c 332      23.151   2.528 106.446  1.00  0.00      chA   
ATOM   3740  CG2 THR c 332      24.357   2.600 108.151  1.00  0.00      chA   
ATOM   3741 HG21 THR c 332      23.754   1.999 108.832  1.00  0.00      chA   
ATOM   3742 HG22 THR c 332      25.130   2.049 107.613  1.00  0.00      chA   
ATOM   3743 HG23 THR c 332      24.786   3.258 108.906  1.00  0.00      chA   
ATOM   3744  OG1 THR c 332      22.581   4.041 107.788  1.00  0.00      chA   
ATOM   3745  HG1 THR c 332      23.106   4.655 108.307  1.00  0.00      chA   
ATOM   3746  C   THR c 332      23.555   4.837 105.044  1.00  0.00      chA   
ATOM   3747  O   THR c 332      23.435   6.026 104.935  1.00  0.00      chA   
ATOM   3748  N   GLY c 333      23.081   3.899 104.180  1.00  0.00      chA   
ATOM   3749  H   GLY c 333      23.244   2.915 104.339  1.00  0.00      chA   
ATOM   3750  CA  GLY c 333      22.156   4.305 103.130  1.00  0.00      chA   
ATOM   3751  HA2 GLY c 333      21.360   4.981 103.442  1.00  0.00      chA   
ATOM   3752  HA3 GLY c 333      22.739   4.875 102.407  1.00  0.00      chA   
ATOM   3753  C   GLY c 333      21.446   3.160 102.396  1.00  0.00      chA   
ATOM   3754  O   GLY c 333      21.859   1.988 102.613  1.00  0.00      chA   
ATOM   3755  N   SER c 334      20.431   3.440 101.602  1.00  0.00      chA   
ATOM   3756  H   SER c 334      20.163   4.409 101.510  1.00  0.00      chA   
ATOM   3757  CA  SER c 334      19.635   2.516 100.784  1.00  0.00      chA   
ATOM   3758  HA  SER c 334      20.302   1.956 100.128  1.00  0.00      chA   
ATOM   3759  CB  SER c 334      18.689   1.632 101.591  1.00  0.00      chA   
ATOM   3760  HB2 SER c 334      18.281   2.241 102.397  1.00  0.00      chA   
ATOM   3761  HB3 SER c 334      17.899   1.184 100.989  1.00  0.00      chA   
ATOM   3762  OG  SER c 334      19.389   0.544 102.242  1.00  0.00      chA   
ATOM   3763  HG  SER c 334      20.311   0.799 102.317  1.00  0.00      chA   
ATOM   3764  C   SER c 334      18.744   3.294  99.796  1.00  0.00      chA   
ATOM   3765  O   SER c 334      18.185   4.340 100.079  1.00  0.00      chA   
ATOM   3766  N   CYX c 335      18.489   2.685  98.579  1.00  0.00      chA   
ATOM   3767  H   CYX c 335      18.861   1.749  98.510  1.00  0.00      chA   
ATOM   3768  CA  CYX c 335      17.473   3.014  97.624  1.00  0.00      chA   
ATOM   3769  HA  CYX c 335      17.283   4.084  97.537  1.00  0.00      chA   
ATOM   3770  CB  CYX c 335      18.003   2.417  96.267  1.00  0.00      chA   
ATOM   3771  HB2 CYX c 335      17.813   1.343  96.241  1.00  0.00      chA   
ATOM   3772  HB3 CYX c 335      17.271   2.738  95.526  1.00  0.00      chA   
ATOM   3773  SG  CYX c 335      19.616   2.807  95.552  1.00  0.00      chA   
ATOM   3774  C   CYX c 335      16.017   2.519  98.021  1.00  0.00      chA   
ATOM   3775  O   CYX c 335      15.204   2.288  97.147  1.00  0.00      chA   
ATOM   3776  N   GLY c 336      15.752   2.190  99.245  1.00  0.00      chA   
ATOM   3777  H   GLY c 336      16.565   2.068  99.831  1.00  0.00      chA   
ATOM   3778  CA  GLY c 336      14.392   2.021  99.830  1.00  0.00      chA   
ATOM   3779  HA2 GLY c 336      13.663   2.651  99.319  1.00  0.00      chA   
ATOM   3780  HA3 GLY c 336      14.064   0.982  99.836  1.00  0.00      chA   
ATOM   3781  C   GLY c 336      14.505   2.697 101.222  1.00  0.00      chA   
ATOM   3782  O   GLY c 336      15.628   3.043 101.580  1.00  0.00      chA   
ATOM   3783  N   PRO c 337      13.429   2.871 102.005  1.00  0.00      chA   
ATOM   3784  CD  PRO c 337      11.975   2.586 101.751  1.00  0.00      chA   
ATOM   3785  HD2 PRO c 337      11.990   1.684 101.141  1.00  0.00      chA   
ATOM   3786  HD3 PRO c 337      11.478   3.358 101.163  1.00  0.00      chA   
ATOM   3787  CG  PRO c 337      11.215   2.329 103.065  1.00  0.00      chA   
ATOM   3788  HG2 PRO c 337      11.318   1.252 103.199  1.00  0.00      chA   
ATOM   3789  HG3 PRO c 337      10.165   2.607 102.967  1.00  0.00      chA   
ATOM   3790  CB  PRO c 337      12.115   3.204 103.941  1.00  0.00      chA   
ATOM   3791  HB2 PRO c 337      12.146   2.949 105.001  1.00  0.00      chA   
ATOM   3792  HB3 PRO c 337      11.567   4.145 103.917  1.00  0.00      chA   
ATOM   3793  CA  PRO c 337      13.486   3.310 103.396  1.00  0.00      chA   
ATOM   3794  HA  PRO c 337      13.791   4.356 103.438  1.00  0.00      chA   
ATOM   3795  C   PRO c 337      14.509   2.486 104.132  1.00  0.00      chA   
ATOM   3796  O   PRO c 337      14.224   1.258 104.300  1.00  0.00      chA   
ATOM   3797  N   VAL c 338      15.534   3.055 104.753  1.00  0.00      chA   
ATOM   3798  H   VAL c 338      15.580   4.058 104.637  1.00  0.00      chA   
ATOM   3799  CA  VAL c 338      16.405   2.261 105.762  1.00  0.00      chA   
ATOM   3800  HA  VAL c 338      16.743   1.444 105.123  1.00  0.00      chA   
ATOM   3801  CB  VAL c 338      17.544   3.148 106.196  1.00  0.00      chA   
ATOM   3802  HB  VAL c 338      17.936   2.677 107.099  1.00  0.00      chA   
ATOM   3803  CG1 VAL c 338      18.565   3.178 105.073  1.00  0.00      chA   
ATOM   3804 HG11 VAL c 338      18.041   3.497 104.171  1.00  0.00      chA   
ATOM   3805 HG12 VAL c 338      19.439   3.780 105.319  1.00  0.00      chA   
ATOM   3806 HG13 VAL c 338      18.918   2.177 104.825  1.00  0.00      chA   
ATOM   3807  CG2 VAL c 338      17.194   4.595 106.584  1.00  0.00      chA   
ATOM   3808 HG21 VAL c 338      17.979   5.070 107.170  1.00  0.00      chA   
ATOM   3809 HG22 VAL c 338      17.183   5.178 105.661  1.00  0.00      chA   
ATOM   3810 HG23 VAL c 338      16.211   4.662 107.050  1.00  0.00      chA   
ATOM   3811  C   VAL c 338      15.600   1.750 106.994  1.00  0.00      chA   
ATOM   3812  O   VAL c 338      14.677   2.356 107.551  1.00  0.00      chA   
ATOM   3813  N   SER c 339      15.999   0.577 107.480  1.00  0.00      chA   
ATOM   3814  H   SER c 339      16.846   0.184 107.096  1.00  0.00      chA   
ATOM   3815  CA  SER c 339      15.305  -0.049 108.600  1.00  0.00      chA   
ATOM   3816  HA  SER c 339      14.236  -0.108 108.400  1.00  0.00      chA   
ATOM   3817  CB  SER c 339      15.743  -1.557 108.666  1.00  0.00      chA   
ATOM   3818  HB2 SER c 339      15.180  -2.031 109.470  1.00  0.00      chA   
ATOM   3819  HB3 SER c 339      15.465  -1.950 107.688  1.00  0.00      chA   
ATOM   3820  OG  SER c 339      17.114  -1.845 108.892  1.00  0.00      chA   
ATOM   3821  HG  SER c 339      17.335  -2.778 108.851  1.00  0.00      chA   
ATOM   3822  C   SER c 339      15.459   0.575 110.039  1.00  0.00      chA   
ATOM   3823  O   SER c 339      15.049  -0.070 110.992  1.00  0.00      chA   
ATOM   3824  N   SER c 340      16.040   1.793 110.189  1.00  0.00      chA   
ATOM   3825  H   SER c 340      16.160   2.336 109.347  1.00  0.00      chA   
ATOM   3826  CA  SER c 340      16.381   2.413 111.522  1.00  0.00      chA   
ATOM   3827  HA  SER c 340      16.285   1.574 112.212  1.00  0.00      chA   
ATOM   3828  CB  SER c 340      17.821   2.926 111.466  1.00  0.00      chA   
ATOM   3829  HB2 SER c 340      17.880   3.499 112.391  1.00  0.00      chA   
ATOM   3830  HB3 SER c 340      18.479   2.060 111.408  1.00  0.00      chA   
ATOM   3831  OG  SER c 340      18.030   3.829 110.415  1.00  0.00      chA   
ATOM   3832  HG  SER c 340      18.876   3.702 109.981  1.00  0.00      chA   
ATOM   3833  C   SER c 340      15.386   3.565 111.933  1.00  0.00      chA   
ATOM   3834  O   SER c 340      14.445   3.920 111.160  1.00  0.00      chA   
ATOM   3835  N   ASN c 341      15.723   4.444 112.995  1.00  0.00      chA   
ATOM   3836  H   ASN c 341      16.614   4.327 113.455  1.00  0.00      chA   
ATOM   3837  CA  ASN c 341      14.896   5.652 113.462  1.00  0.00      chA   
ATOM   3838  HA  ASN c 341      13.975   5.269 113.899  1.00  0.00      chA   
ATOM   3839  CB  ASN c 341      15.586   6.423 114.587  1.00  0.00      chA   
ATOM   3840  HB2 ASN c 341      15.711   5.661 115.356  1.00  0.00      chA   
ATOM   3841  HB3 ASN c 341      16.462   6.868 114.117  1.00  0.00      chA   
ATOM   3842  CG  ASN c 341      14.726   7.498 115.115  1.00  0.00      chA   
ATOM   3843  OD1 ASN c 341      13.584   7.616 114.875  1.00  0.00      chA   
ATOM   3844  ND2 ASN c 341      15.387   8.340 115.833  1.00  0.00      chA   
ATOM   3845 HD21 ASN c 341      14.947   9.075 116.366  1.00  0.00      chA   
ATOM   3846 HD22 ASN c 341      16.376   8.171 115.947  1.00  0.00      chA   
ATOM   3847  C   ASN c 341      14.504   6.543 112.328  1.00  0.00      chA   
ATOM   3848  O   ASN c 341      15.400   6.974 111.603  1.00  0.00      chA   
ATOM   3849  N   GLY c 342      13.228   6.634 112.094  1.00  0.00      chA   
ATOM   3850  H   GLY c 342      12.649   6.062 112.694  1.00  0.00      chA   
ATOM   3851  CA  GLY c 342      12.676   7.061 110.752  1.00  0.00      chA   
ATOM   3852  HA2 GLY c 342      13.106   8.023 110.473  1.00  0.00      chA   
ATOM   3853  HA3 GLY c 342      12.993   6.341 109.998  1.00  0.00      chA   
ATOM   3854  C   GLY c 342      11.139   7.108 110.799  1.00  0.00      chA   
ATOM   3855  O   GLY c 342      10.591   7.519 109.750  1.00  0.00      chA   
ATOM   3856  N   ALA c 343      10.448   6.743 111.802  1.00  0.00      chA   
ATOM   3857  H   ALA c 343      10.898   6.653 112.702  1.00  0.00      chA   
ATOM   3858  CA  ALA c 343       8.985   6.462 111.856  1.00  0.00      chA   
ATOM   3859  HA  ALA c 343       8.591   5.771 111.111  1.00  0.00      chA   
ATOM   3860  CB  ALA c 343       8.586   5.764 113.173  1.00  0.00      chA   
ATOM   3861  HB1 ALA c 343       8.913   6.418 113.982  1.00  0.00      chA   
ATOM   3862  HB2 ALA c 343       7.504   5.658 113.243  1.00  0.00      chA   
ATOM   3863  HB3 ALA c 343       8.983   4.770 113.377  1.00  0.00      chA   
ATOM   3864  C   ALA c 343       8.104   7.744 111.753  1.00  0.00      chA   
ATOM   3865  O   ALA c 343       6.892   7.559 111.687  1.00  0.00      chA   
ATOM   3866  N   TYR c 344       8.672   8.970 111.662  1.00  0.00      chA   
ATOM   3867  H   TYR c 344       9.677   9.062 111.633  1.00  0.00      chA   
ATOM   3868  CA  TYR c 344       7.949  10.229 111.443  1.00  0.00      chA   
ATOM   3869  HA  TYR c 344       6.915  10.008 111.179  1.00  0.00      chA   
ATOM   3870  CB  TYR c 344       7.801  10.957 112.836  1.00  0.00      chA   
ATOM   3871  HB2 TYR c 344       7.515  10.170 113.536  1.00  0.00      chA   
ATOM   3872  HB3 TYR c 344       8.827  11.293 112.988  1.00  0.00      chA   
ATOM   3873  CG  TYR c 344       6.804  12.026 112.835  1.00  0.00      chA   
ATOM   3874  CD1 TYR c 344       5.462  11.844 113.069  1.00  0.00      chA   
ATOM   3875  HD1 TYR c 344       5.071  10.862 113.293  1.00  0.00      chA   
ATOM   3876  CE1 TYR c 344       4.525  12.886 113.032  1.00  0.00      chA   
ATOM   3877  HE1 TYR c 344       3.468  12.712 113.176  1.00  0.00      chA   
ATOM   3878  CZ  TYR c 344       5.019  14.214 112.852  1.00  0.00      chA   
ATOM   3879  OH  TYR c 344       4.134  15.266 112.638  1.00  0.00      chA   
ATOM   3880  HH  TYR c 344       4.547  16.131 112.598  1.00  0.00      chA   
ATOM   3881  CE2 TYR c 344       6.428  14.443 112.780  1.00  0.00      chA   
ATOM   3882  HE2 TYR c 344       6.860  15.429 112.871  1.00  0.00      chA   
ATOM   3883  CD2 TYR c 344       7.284  13.360 112.809  1.00  0.00      chA   
ATOM   3884  HD2 TYR c 344       8.353  13.488 112.732  1.00  0.00      chA   
ATOM   3885  C   TYR c 344       8.628  10.971 110.256  1.00  0.00      chA   
ATOM   3886  O   TYR c 344       9.228  10.240 109.458  1.00  0.00      chA   
ATOM   3887  N   GLY c 345       8.577  12.320 110.052  1.00  0.00      chA   
ATOM   3888  H   GLY c 345       8.065  12.902 110.700  1.00  0.00      chA   
ATOM   3889  CA  GLY c 345       9.463  13.049 109.035  1.00  0.00      chA   
ATOM   3890  HA2 GLY c 345      10.490  12.806 109.305  1.00  0.00      chA   
ATOM   3891  HA3 GLY c 345       9.090  12.786 108.044  1.00  0.00      chA   
ATOM   3892  C   GLY c 345       9.238  14.586 109.059  1.00  0.00      chA   
ATOM   3893  O   GLY c 345       8.493  15.001 109.941  1.00  0.00      chA   
ATOM   3894  N   VAL c 346       9.756  15.335 108.087  1.00  0.00      chA   
ATOM   3895  H   VAL c 346      10.316  14.798 107.439  1.00  0.00      chA   
ATOM   3896  CA  VAL c 346       9.659  16.817 108.005  1.00  0.00      chA   
ATOM   3897  HA  VAL c 346       8.623  17.045 108.248  1.00  0.00      chA   
ATOM   3898  CB  VAL c 346      10.675  17.542 109.027  1.00  0.00      chA   
ATOM   3899  HB  VAL c 346      10.477  17.132 110.016  1.00  0.00      chA   
ATOM   3900  CG1 VAL c 346      12.185  17.316 108.848  1.00  0.00      chA   
ATOM   3901 HG11 VAL c 346      12.593  17.810 109.731  1.00  0.00      chA   
ATOM   3902 HG12 VAL c 346      12.339  16.239 108.875  1.00  0.00      chA   
ATOM   3903 HG13 VAL c 346      12.595  17.781 107.951  1.00  0.00      chA   
ATOM   3904  CG2 VAL c 346      10.347  19.008 109.135  1.00  0.00      chA   
ATOM   3905 HG21 VAL c 346      10.644  19.490 108.204  1.00  0.00      chA   
ATOM   3906 HG22 VAL c 346       9.295  19.197 109.351  1.00  0.00      chA   
ATOM   3907 HG23 VAL c 346      10.935  19.358 109.983  1.00  0.00      chA   
ATOM   3908  C   VAL c 346       9.939  17.378 106.600  1.00  0.00      chA   
ATOM   3909  O   VAL c 346      10.732  16.708 105.931  1.00  0.00      chA   
ATOM   3910  N   LYS c 347       9.320  18.475 106.118  1.00  0.00      chA   
ATOM   3911  H   LYS c 347       8.651  18.936 106.718  1.00  0.00      chA   
ATOM   3912  CA  LYS c 347       9.425  18.905 104.702  1.00  0.00      chA   
ATOM   3913  HA  LYS c 347       9.143  18.121 103.999  1.00  0.00      chA   
ATOM   3914  CB  LYS c 347       8.536  20.119 104.440  1.00  0.00      chA   
ATOM   3915  HB2 LYS c 347       7.548  19.996 104.887  1.00  0.00      chA   
ATOM   3916  HB3 LYS c 347       9.040  20.999 104.838  1.00  0.00      chA   
ATOM   3917  CG  LYS c 347       8.358  20.387 102.941  1.00  0.00      chA   
ATOM   3918  HG2 LYS c 347       9.303  20.517 102.414  1.00  0.00      chA   
ATOM   3919  HG3 LYS c 347       7.916  19.493 102.503  1.00  0.00      chA   
ATOM   3920  CD  LYS c 347       7.482  21.674 102.719  1.00  0.00      chA   
ATOM   3921  HD2 LYS c 347       6.466  21.511 103.078  1.00  0.00      chA   
ATOM   3922  HD3 LYS c 347       8.031  22.420 103.294  1.00  0.00      chA   
ATOM   3923  CE  LYS c 347       7.524  22.162 101.220  1.00  0.00      chA   
ATOM   3924  HE2 LYS c 347       6.790  22.951 101.051  1.00  0.00      chA   
ATOM   3925  HE3 LYS c 347       8.500  22.638 101.126  1.00  0.00      chA   
ATOM   3926  NZ  LYS c 347       7.527  21.078 100.157  1.00  0.00      chA   
ATOM   3927  HZ1 LYS c 347       8.250  20.392 100.323  1.00  0.00      chA   
ATOM   3928  HZ2 LYS c 347       6.623  20.646 100.030  1.00  0.00      chA   
ATOM   3929  HZ3 LYS c 347       7.754  21.347  99.211  1.00  0.00      chA   
ATOM   3930  C   LYS c 347      10.883  19.183 104.407  1.00  0.00      chA   
ATOM   3931  O   LYS c 347      11.563  19.921 105.115  1.00  0.00      chA   
ATOM   3932  N   GLY c 348      11.364  18.603 103.352  1.00  0.00      chA   
ATOM   3933  H   GLY c 348      10.748  18.081 102.745  1.00  0.00      chA   
ATOM   3934  CA  GLY c 348      12.655  18.871 102.711  1.00  0.00      chA   
ATOM   3935  HA2 GLY c 348      13.131  19.787 103.060  1.00  0.00      chA   
ATOM   3936  HA3 GLY c 348      13.347  18.164 103.166  1.00  0.00      chA   
ATOM   3937  C   GLY c 348      12.683  18.825 101.147  1.00  0.00      chA   
ATOM   3938  O   GLY c 348      11.627  18.939 100.598  1.00  0.00      chA   
ATOM   3939  N   PHE c 349      13.931  18.626 100.625  1.00  0.00      chA   
ATOM   3940  H   PHE c 349      14.793  18.531 101.143  1.00  0.00      chA   
ATOM   3941  CA  PHE c 349      14.091  18.781  99.173  1.00  0.00      chA   
ATOM   3942  HA  PHE c 349      13.299  18.224  98.671  1.00  0.00      chA   
ATOM   3943  CB  PHE c 349      13.929  20.215  98.717  1.00  0.00      chA   
ATOM   3944  HB2 PHE c 349      13.616  20.210  97.673  1.00  0.00      chA   
ATOM   3945  HB3 PHE c 349      13.099  20.622  99.296  1.00  0.00      chA   
ATOM   3946  CG  PHE c 349      15.094  21.173  99.004  1.00  0.00      chA   
ATOM   3947  CD1 PHE c 349      15.267  21.749 100.308  1.00  0.00      chA   
ATOM   3948  HD1 PHE c 349      14.607  21.531 101.134  1.00  0.00      chA   
ATOM   3949  CE1 PHE c 349      16.399  22.654 100.413  1.00  0.00      chA   
ATOM   3950  HE1 PHE c 349      16.553  23.178 101.345  1.00  0.00      chA   
ATOM   3951  CZ  PHE c 349      17.342  22.698  99.414  1.00  0.00      chA   
ATOM   3952  HZ  PHE c 349      18.285  23.187  99.612  1.00  0.00      chA   
ATOM   3953  CE2 PHE c 349      17.154  22.077  98.200  1.00  0.00      chA   
ATOM   3954  HE2 PHE c 349      17.860  22.242  97.400  1.00  0.00      chA   
ATOM   3955  CD2 PHE c 349      15.958  21.377  97.924  1.00  0.00      chA   
ATOM   3956  HD2 PHE c 349      15.735  20.922  96.970  1.00  0.00      chA   
ATOM   3957  C   PHE c 349      15.428  18.175  98.740  1.00  0.00      chA   
ATOM   3958  O   PHE c 349      16.302  18.138  99.582  1.00  0.00      chA   
ATOM   3959  N   SER c 350      15.609  17.899  97.440  1.00  0.00      chA   
ATOM   3960  H   SER c 350      14.777  17.902  96.868  1.00  0.00      chA   
ATOM   3961  CA  SER c 350      16.905  17.764  96.797  1.00  0.00      chA   
ATOM   3962  HA  SER c 350      17.644  18.424  97.253  1.00  0.00      chA   
ATOM   3963  CB  SER c 350      17.433  16.278  96.914  1.00  0.00      chA   
ATOM   3964  HB2 SER c 350      16.847  15.603  96.289  1.00  0.00      chA   
ATOM   3965  HB3 SER c 350      18.437  16.259  96.490  1.00  0.00      chA   
ATOM   3966  OG  SER c 350      17.549  15.893  98.298  1.00  0.00      chA   
ATOM   3967  HG  SER c 350      17.268  16.628  98.847  1.00  0.00      chA   
ATOM   3968  C   SER c 350      16.951  18.213  95.278  1.00  0.00      chA   
ATOM   3969  O   SER c 350      15.949  18.132  94.560  1.00  0.00      chA   
ATOM   3970  N   PHE c 351      18.092  18.469  94.736  1.00  0.00      chA   
ATOM   3971  H   PHE c 351      18.911  18.460  95.328  1.00  0.00      chA   
ATOM   3972  CA  PHE c 351      18.338  18.553  93.260  1.00  0.00      chA   
ATOM   3973  HA  PHE c 351      17.377  18.397  92.771  1.00  0.00      chA   
ATOM   3974  CB  PHE c 351      18.816  19.970  92.869  1.00  0.00      chA   
ATOM   3975  HB2 PHE c 351      19.752  20.222  93.367  1.00  0.00      chA   
ATOM   3976  HB3 PHE c 351      19.076  19.881  91.815  1.00  0.00      chA   
ATOM   3977  CG  PHE c 351      17.799  21.053  93.139  1.00  0.00      chA   
ATOM   3978  CD1 PHE c 351      17.985  21.896  94.235  1.00  0.00      chA   
ATOM   3979  HD1 PHE c 351      18.680  21.631  95.018  1.00  0.00      chA   
ATOM   3980  CE1 PHE c 351      17.092  22.986  94.428  1.00  0.00      chA   
ATOM   3981  HE1 PHE c 351      17.158  23.617  95.302  1.00  0.00      chA   
ATOM   3982  CZ  PHE c 351      16.067  23.305  93.489  1.00  0.00      chA   
ATOM   3983  HZ  PHE c 351      15.358  24.115  93.577  1.00  0.00      chA   
ATOM   3984  CE2 PHE c 351      15.991  22.527  92.307  1.00  0.00      chA   
ATOM   3985  HE2 PHE c 351      15.369  22.788  91.463  1.00  0.00      chA   
ATOM   3986  CD2 PHE c 351      16.829  21.396  92.194  1.00  0.00      chA   
ATOM   3987  HD2 PHE c 351      16.794  20.790  91.299  1.00  0.00      chA   
ATOM   3988  C   PHE c 351      19.222  17.439  92.753  1.00  0.00      chA   
ATOM   3989  O   PHE c 351      20.049  16.878  93.521  1.00  0.00      chA   
ATOM   3990  N   LYS c 352      19.187  17.115  91.449  1.00  0.00      chA   
ATOM   3991  H   LYS c 352      18.606  17.648  90.818  1.00  0.00      chA   
ATOM   3992  CA  LYS c 352      19.799  15.974  90.769  1.00  0.00      chA   
ATOM   3993  HA  LYS c 352      20.482  15.447  91.436  1.00  0.00      chA   
ATOM   3994  CB  LYS c 352      18.607  14.981  90.534  1.00  0.00      chA   
ATOM   3995  HB2 LYS c 352      18.171  14.863  91.526  1.00  0.00      chA   
ATOM   3996  HB3 LYS c 352      17.869  15.419  89.862  1.00  0.00      chA   
ATOM   3997  CG  LYS c 352      19.006  13.752  89.787  1.00  0.00      chA   
ATOM   3998  HG2 LYS c 352      19.755  13.975  89.026  1.00  0.00      chA   
ATOM   3999  HG3 LYS c 352      19.543  13.032  90.405  1.00  0.00      chA   
ATOM   4000  CD  LYS c 352      17.775  13.171  89.096  1.00  0.00      chA   
ATOM   4001  HD2 LYS c 352      17.009  13.002  89.852  1.00  0.00      chA   
ATOM   4002  HD3 LYS c 352      17.441  13.964  88.427  1.00  0.00      chA   
ATOM   4003  CE  LYS c 352      18.191  11.945  88.230  1.00  0.00      chA   
ATOM   4004  HE2 LYS c 352      18.967  12.303  87.553  1.00  0.00      chA   
ATOM   4005  HE3 LYS c 352      18.625  11.261  88.959  1.00  0.00      chA   
ATOM   4006  NZ  LYS c 352      17.126  11.367  87.412  1.00  0.00      chA   
ATOM   4007  HZ1 LYS c 352      16.522  12.001  86.910  1.00  0.00      chA   
ATOM   4008  HZ2 LYS c 352      17.515  10.774  86.694  1.00  0.00      chA   
ATOM   4009  HZ3 LYS c 352      16.480  10.810  87.954  1.00  0.00      chA   
ATOM   4010  C   LYS c 352      20.571  16.485  89.543  1.00  0.00      chA   
ATOM   4011  O   LYS c 352      20.085  17.379  88.817  1.00  0.00      chA   
ATOM   4012  N   TYR c 353      21.734  15.869  89.369  1.00  0.00      chA   
ATOM   4013  H   TYR c 353      22.014  15.190  90.063  1.00  0.00      chA   
ATOM   4014  CA  TYR c 353      22.765  16.302  88.424  1.00  0.00      chA   
ATOM   4015  HA  TYR c 353      22.365  17.155  87.875  1.00  0.00      chA   
ATOM   4016  CB  TYR c 353      23.991  16.944  89.172  1.00  0.00      chA   
ATOM   4017  HB2 TYR c 353      24.196  16.428  90.110  1.00  0.00      chA   
ATOM   4018  HB3 TYR c 353      24.902  16.868  88.577  1.00  0.00      chA   
ATOM   4019  CG  TYR c 353      23.742  18.433  89.431  1.00  0.00      chA   
ATOM   4020  CD1 TYR c 353      22.850  18.782  90.406  1.00  0.00      chA   
ATOM   4021  HD1 TYR c 353      22.417  18.059  91.083  1.00  0.00      chA   
ATOM   4022  CE1 TYR c 353      22.468  20.132  90.619  1.00  0.00      chA   
ATOM   4023  HE1 TYR c 353      21.827  20.386  91.450  1.00  0.00      chA   
ATOM   4024  CZ  TYR c 353      23.047  21.129  89.782  1.00  0.00      chA   
ATOM   4025  OH  TYR c 353      22.817  22.421  90.027  1.00  0.00      chA   
ATOM   4026  HH  TYR c 353      23.269  23.024  89.434  1.00  0.00      chA   
ATOM   4027  CE2 TYR c 353      24.026  20.787  88.793  1.00  0.00      chA   
ATOM   4028  HE2 TYR c 353      24.420  21.563  88.153  1.00  0.00      chA   
ATOM   4029  CD2 TYR c 353      24.388  19.400  88.630  1.00  0.00      chA   
ATOM   4030  HD2 TYR c 353      25.111  19.196  87.854  1.00  0.00      chA   
ATOM   4031  C   TYR c 353      23.123  15.100  87.463  1.00  0.00      chA   
ATOM   4032  O   TYR c 353      24.294  14.808  87.185  1.00  0.00      chA   
ATOM   4033  N   GLY c 354      22.059  14.393  87.013  1.00  0.00      chA   
ATOM   4034  H   GLY c 354      21.165  14.849  87.125  1.00  0.00      chA   
ATOM   4035  CA  GLY c 354      22.143  13.096  86.307  1.00  0.00      chA   
ATOM   4036  HA2 GLY c 354      21.359  12.975  85.560  1.00  0.00      chA   
ATOM   4037  HA3 GLY c 354      23.023  13.239  85.680  1.00  0.00      chA   
ATOM   4038  C   GLY c 354      22.168  11.818  87.278  1.00  0.00      chA   
ATOM   4039  O   GLY c 354      21.141  11.125  87.272  1.00  0.00      chA   
ATOM   4040  N   ASN c 355      23.189  11.742  88.218  1.00  0.00      chA   
ATOM   4041  H   ASN c 355      24.023  12.276  88.024  1.00  0.00      chA   
ATOM   4042  CA  ASN c 355      23.259  10.663  89.174  1.00  0.00      chA   
ATOM   4043  HA  ASN c 355      22.271  10.207  89.204  1.00  0.00      chA   
ATOM   4044  CB  ASN c 355      24.111   9.619  88.613  1.00  0.00      chA   
ATOM   4045  HB2 ASN c 355      23.740   9.508  87.594  1.00  0.00      chA   
ATOM   4046  HB3 ASN c 355      25.132   9.997  88.559  1.00  0.00      chA   
ATOM   4047  CG  ASN c 355      23.983   8.292  89.238  1.00  0.00      chA   
ATOM   4048  OD1 ASN c 355      23.052   7.973  90.033  1.00  0.00      chA   
ATOM   4049  ND2 ASN c 355      24.933   7.415  89.068  1.00  0.00      chA   
ATOM   4050 HD21 ASN c 355      24.862   6.570  89.617  1.00  0.00      chA   
ATOM   4051 HD22 ASN c 355      25.742   7.688  88.528  1.00  0.00      chA   
ATOM   4052  C   ASN c 355      23.585  11.181  90.544  1.00  0.00      chA   
ATOM   4053  O   ASN c 355      23.100  10.613  91.522  1.00  0.00      chA   
ATOM   4054  N   GLY c 356      24.412  12.225  90.707  1.00  0.00      chA   
ATOM   4055  H   GLY c 356      25.074  12.451  89.979  1.00  0.00      chA   
ATOM   4056  CA  GLY c 356      24.722  12.844  92.012  1.00  0.00      chA   
ATOM   4057  HA2 GLY c 356      24.727  12.113  92.820  1.00  0.00      chA   
ATOM   4058  HA3 GLY c 356      25.650  13.413  91.949  1.00  0.00      chA   
ATOM   4059  C   GLY c 356      23.643  13.904  92.412  1.00  0.00      chA   
ATOM   4060  O   GLY c 356      22.892  14.355  91.573  1.00  0.00      chA   
ATOM   4061  N   VAL c 357      23.565  14.206  93.708  1.00  0.00      chA   
ATOM   4062  H   VAL c 357      24.349  14.030  94.320  1.00  0.00      chA   
ATOM   4063  CA  VAL c 357      22.473  14.995  94.258  1.00  0.00      chA   
ATOM   4064  HA  VAL c 357      21.965  15.538  93.461  1.00  0.00      chA   
ATOM   4065  CB  VAL c 357      21.531  14.048  95.021  1.00  0.00      chA   
ATOM   4066  HB  VAL c 357      20.628  14.551  95.366  1.00  0.00      chA   
ATOM   4067  CG1 VAL c 357      20.907  13.003  94.048  1.00  0.00      chA   
ATOM   4068 HG11 VAL c 357      21.704  12.369  93.658  1.00  0.00      chA   
ATOM   4069 HG12 VAL c 357      20.164  12.445  94.617  1.00  0.00      chA   
ATOM   4070 HG13 VAL c 357      20.334  13.434  93.228  1.00  0.00      chA   
ATOM   4071  CG2 VAL c 357      22.179  13.352  96.264  1.00  0.00      chA   
ATOM   4072 HG21 VAL c 357      21.527  12.618  96.736  1.00  0.00      chA   
ATOM   4073 HG22 VAL c 357      23.031  12.761  95.928  1.00  0.00      chA   
ATOM   4074 HG23 VAL c 357      22.541  14.105  96.965  1.00  0.00      chA   
ATOM   4075  C   VAL c 357      22.956  16.128  95.173  1.00  0.00      chA   
ATOM   4076  O   VAL c 357      23.922  15.921  95.892  1.00  0.00      chA   
ATOM   4077  N   TRP c 358      22.216  17.203  95.204  1.00  0.00      chA   
ATOM   4078  H   TRP c 358      21.395  17.314  94.625  1.00  0.00      chA   
ATOM   4079  CA  TRP c 358      22.443  18.226  96.286  1.00  0.00      chA   
ATOM   4080  HA  TRP c 358      23.369  18.081  96.844  1.00  0.00      chA   
ATOM   4081  CB  TRP c 358      22.540  19.613  95.712  1.00  0.00      chA   
ATOM   4082  HB2 TRP c 358      21.907  19.666  94.826  1.00  0.00      chA   
ATOM   4083  HB3 TRP c 358      22.261  20.257  96.545  1.00  0.00      chA   
ATOM   4084  CG  TRP c 358      23.873  20.075  95.169  1.00  0.00      chA   
ATOM   4085  CD1 TRP c 358      24.256  19.795  93.900  1.00  0.00      chA   
ATOM   4086  HD1 TRP c 358      23.631  19.282  93.182  1.00  0.00      chA   
ATOM   4087  NE1 TRP c 358      25.458  20.372  93.682  1.00  0.00      chA   
ATOM   4088  HE1 TRP c 358      25.901  20.439  92.778  1.00  0.00      chA   
ATOM   4089  CE2 TRP c 358      26.019  21.004  94.771  1.00  0.00      chA   
ATOM   4090  CZ2 TRP c 358      27.238  21.635  95.090  1.00  0.00      chA   
ATOM   4091  HZ2 TRP c 358      28.028  21.689  94.356  1.00  0.00      chA   
ATOM   4092  CH2 TRP c 358      27.505  22.046  96.436  1.00  0.00      chA   
ATOM   4093  HH2 TRP c 358      28.443  22.534  96.659  1.00  0.00      chA   
ATOM   4094  CZ3 TRP c 358      26.503  21.906  97.359  1.00  0.00      chA   
ATOM   4095  HZ3 TRP c 358      26.657  22.318  98.345  1.00  0.00      chA   
ATOM   4096  CE3 TRP c 358      25.306  21.226  97.051  1.00  0.00      chA   
ATOM   4097  HE3 TRP c 358      24.604  21.051  97.854  1.00  0.00      chA   
ATOM   4098  CD2 TRP c 358      25.020  20.732  95.765  1.00  0.00      chA   
ATOM   4099  C   TRP c 358      21.228  18.174  97.256  1.00  0.00      chA   
ATOM   4100  O   TRP c 358      20.076  17.990  96.901  1.00  0.00      chA   
ATOM   4101  N   ILE c 359      21.418  18.319  98.556  1.00  0.00      chA   
ATOM   4102  H   ILE c 359      22.368  18.473  98.864  1.00  0.00      chA   
ATOM   4103  CA  ILE c 359      20.444  17.963  99.600  1.00  0.00      chA   
ATOM   4104  HA  ILE c 359      19.474  17.902  99.106  1.00  0.00      chA   
ATOM   4105  CB  ILE c 359      20.782  16.596 100.313  1.00  0.00      chA   
ATOM   4106  HB  ILE c 359      21.763  16.727 100.769  1.00  0.00      chA   
ATOM   4107  CG2 ILE c 359      19.816  16.150 101.469  1.00  0.00      chA   
ATOM   4108 HG21 ILE c 359      20.428  15.745 102.275  1.00  0.00      chA   
ATOM   4109 HG22 ILE c 359      19.432  17.068 101.913  1.00  0.00      chA   
ATOM   4110 HG23 ILE c 359      19.053  15.462 101.106  1.00  0.00      chA   
ATOM   4111  CG1 ILE c 359      21.054  15.504  99.264  1.00  0.00      chA   
ATOM   4112 HG12 ILE c 359      20.142  15.246  98.724  1.00  0.00      chA   
ATOM   4113 HG13 ILE c 359      21.829  15.868  98.589  1.00  0.00      chA   
ATOM   4114  CD1 ILE c 359      21.617  14.248  99.918  1.00  0.00      chA   
ATOM   4115 HD11 ILE c 359      21.863  13.472  99.193  1.00  0.00      chA   
ATOM   4116 HD12 ILE c 359      22.523  14.493 100.471  1.00  0.00      chA   
ATOM   4117 HD13 ILE c 359      20.881  13.742 100.542  1.00  0.00      chA   
ATOM   4118  C   ILE c 359      20.446  19.070 100.643  1.00  0.00      chA   
ATOM   4119  O   ILE c 359      21.243  19.116 101.589  1.00  0.00      chA   
ATOM   4120  N   GLY c 360      19.471  19.931 100.616  1.00  0.00      chA   
ATOM   4121  H   GLY c 360      18.753  19.863  99.909  1.00  0.00      chA   
ATOM   4122  CA  GLY c 360      19.178  20.873 101.680  1.00  0.00      chA   
ATOM   4123  HA2 GLY c 360      20.113  21.365 101.949  1.00  0.00      chA   
ATOM   4124  HA3 GLY c 360      18.480  21.655 101.383  1.00  0.00      chA   
ATOM   4125  C   GLY c 360      18.465  20.243 102.926  1.00  0.00      chA   
ATOM   4126  O   GLY c 360      17.324  19.786 102.747  1.00  0.00      chA   
ATOM   4127  N   ARG c 361      19.043  20.392 104.152  1.00  0.00      chA   
ATOM   4128  H   ARG c 361      19.957  20.823 104.137  1.00  0.00      chA   
ATOM   4129  CA  ARG c 361      18.466  19.676 105.281  1.00  0.00      chA   
ATOM   4130  HA  ARG c 361      17.381  19.634 105.191  1.00  0.00      chA   
ATOM   4131  CB  ARG c 361      19.064  18.262 105.274  1.00  0.00      chA   
ATOM   4132  HB2 ARG c 361      18.689  17.759 106.165  1.00  0.00      chA   
ATOM   4133  HB3 ARG c 361      18.670  17.680 104.441  1.00  0.00      chA   
ATOM   4134  CG  ARG c 361      20.692  18.176 105.302  1.00  0.00      chA   
ATOM   4135  HG2 ARG c 361      21.083  18.905 104.594  1.00  0.00      chA   
ATOM   4136  HG3 ARG c 361      20.991  18.599 106.262  1.00  0.00      chA   
ATOM   4137  CD  ARG c 361      21.399  16.901 105.204  1.00  0.00      chA   
ATOM   4138  HD2 ARG c 361      20.875  16.266 105.918  1.00  0.00      chA   
ATOM   4139  HD3 ARG c 361      21.275  16.450 104.219  1.00  0.00      chA   
ATOM   4140  NE  ARG c 361      22.835  16.921 105.591  1.00  0.00      chA   
ATOM   4141  HE  ARG c 361      23.279  17.788 105.856  1.00  0.00      chA   
ATOM   4142  CZ  ARG c 361      23.573  15.883 105.869  1.00  0.00      chA   
ATOM   4143  NH1 ARG c 361      24.755  16.096 106.221  1.00  0.00      chA   
ATOM   4144 HH11 ARG c 361      24.990  17.038 106.501  1.00  0.00      chA   
ATOM   4145 HH12 ARG c 361      25.319  15.352 106.608  1.00  0.00      chA   
ATOM   4146  NH2 ARG c 361      23.185  14.674 105.850  1.00  0.00      chA   
ATOM   4147 HH21 ARG c 361      22.189  14.515 105.864  1.00  0.00      chA   
ATOM   4148 HH22 ARG c 361      23.797  13.919 106.124  1.00  0.00      chA   
ATOM   4149  C   ARG c 361      18.739  20.240 106.656  1.00  0.00      chA   
ATOM   4150  O   ARG c 361      19.764  20.865 106.909  1.00  0.00      chA   
ATOM   4151  N   THR c 362      17.893  19.926 107.659  1.00  0.00      chA   
ATOM   4152  H   THR c 362      17.066  19.400 107.414  1.00  0.00      chA   
ATOM   4153  CA  THR c 362      18.066  20.276 109.092  1.00  0.00      chA   
ATOM   4154  HA  THR c 362      18.128  21.353 109.247  1.00  0.00      chA   
ATOM   4155  CB  THR c 362      16.878  19.681 109.883  1.00  0.00      chA   
ATOM   4156  HB  THR c 362      16.976  18.609 110.062  1.00  0.00      chA   
ATOM   4157  CG2 THR c 362      16.875  20.232 111.290  1.00  0.00      chA   
ATOM   4158 HG21 THR c 362      15.963  19.960 111.820  1.00  0.00      chA   
ATOM   4159 HG22 THR c 362      17.766  19.873 111.803  1.00  0.00      chA   
ATOM   4160 HG23 THR c 362      16.991  21.315 111.241  1.00  0.00      chA   
ATOM   4161  OG1 THR c 362      15.680  20.011 109.268  1.00  0.00      chA   
ATOM   4162  HG1 THR c 362      14.944  19.926 109.879  1.00  0.00      chA   
ATOM   4163  C   THR c 362      19.426  19.766 109.570  1.00  0.00      chA   
ATOM   4164  O   THR c 362      19.677  18.602 109.374  1.00  0.00      chA   
ATOM   4165  N   LYS c 363      20.262  20.611 110.195  1.00  0.00      chA   
ATOM   4166  H   LYS c 363      19.888  21.528 110.399  1.00  0.00      chA   
ATOM   4167  CA  LYS c 363      21.578  20.329 110.624  1.00  0.00      chA   
ATOM   4168  HA  LYS c 363      22.167  19.767 109.900  1.00  0.00      chA   
ATOM   4169  CB  LYS c 363      22.397  21.569 111.024  1.00  0.00      chA   
ATOM   4170  HB2 LYS c 363      22.250  22.368 110.298  1.00  0.00      chA   
ATOM   4171  HB3 LYS c 363      22.016  21.907 111.987  1.00  0.00      chA   
ATOM   4172  CG  LYS c 363      23.882  21.281 111.041  1.00  0.00      chA   
ATOM   4173  HG2 LYS c 363      24.110  20.600 111.860  1.00  0.00      chA   
ATOM   4174  HG3 LYS c 363      24.031  20.839 110.056  1.00  0.00      chA   
ATOM   4175  CD  LYS c 363      24.829  22.503 111.207  1.00  0.00      chA   
ATOM   4176  HD2 LYS c 363      24.729  22.991 110.238  1.00  0.00      chA   
ATOM   4177  HD3 LYS c 363      24.486  23.055 112.082  1.00  0.00      chA   
ATOM   4178  CE  LYS c 363      26.219  22.024 111.492  1.00  0.00      chA   
ATOM   4179  HE2 LYS c 363      26.838  22.834 111.877  1.00  0.00      chA   
ATOM   4180  HE3 LYS c 363      26.145  21.268 112.275  1.00  0.00      chA   
ATOM   4181  NZ  LYS c 363      26.996  21.576 110.331  1.00  0.00      chA   
ATOM   4182  HZ1 LYS c 363      26.548  20.950 109.678  1.00  0.00      chA   
ATOM   4183  HZ2 LYS c 363      27.312  22.327 109.734  1.00  0.00      chA   
ATOM   4184  HZ3 LYS c 363      27.821  21.076 110.629  1.00  0.00      chA   
ATOM   4185  C   LYS c 363      21.566  19.288 111.805  1.00  0.00      chA   
ATOM   4186  O   LYS c 363      22.442  18.423 111.840  1.00  0.00      chA   
ATOM   4187  N   SER c 364      20.703  19.387 112.811  1.00  0.00      chA   
ATOM   4188  H   SER c 364      20.069  20.166 112.713  1.00  0.00      chA   
ATOM   4189  CA  SER c 364      20.531  18.333 113.855  1.00  0.00      chA   
ATOM   4190  HA  SER c 364      21.379  18.164 114.519  1.00  0.00      chA   
ATOM   4191  CB  SER c 364      19.416  18.919 114.794  1.00  0.00      chA   
ATOM   4192  HB2 SER c 364      19.706  19.935 115.063  1.00  0.00      chA   
ATOM   4193  HB3 SER c 364      18.471  18.969 114.254  1.00  0.00      chA   
ATOM   4194  OG  SER c 364      19.289  18.076 115.946  1.00  0.00      chA   
ATOM   4195  HG  SER c 364      18.577  18.432 116.482  1.00  0.00      chA   
ATOM   4196  C   SER c 364      20.124  16.968 113.359  1.00  0.00      chA   
ATOM   4197  O   SER c 364      19.453  16.815 112.376  1.00  0.00      chA   
ATOM   4198  N   THR c 365      20.317  15.925 114.156  1.00  0.00      chA   
ATOM   4199  H   THR c 365      20.652  16.099 115.093  1.00  0.00      chA   
ATOM   4200  CA  THR c 365      19.861  14.571 113.956  1.00  0.00      chA   
ATOM   4201  HA  THR c 365      19.872  14.318 112.896  1.00  0.00      chA   
ATOM   4202  CB  THR c 365      20.707  13.557 114.685  1.00  0.00      chA   
ATOM   4203  HB  THR c 365      20.113  12.646 114.619  1.00  0.00      chA   
ATOM   4204  CG2 THR c 365      22.087  13.232 114.149  1.00  0.00      chA   
ATOM   4205 HG21 THR c 365      22.275  12.201 114.450  1.00  0.00      chA   
ATOM   4206 HG22 THR c 365      22.075  13.343 113.066  1.00  0.00      chA   
ATOM   4207 HG23 THR c 365      22.842  13.903 114.560  1.00  0.00      chA   
ATOM   4208  OG1 THR c 365      20.860  13.884 116.063  1.00  0.00      chA   
ATOM   4209  HG1 THR c 365      20.480  13.174 116.585  1.00  0.00      chA   
ATOM   4210  C   THR c 365      18.458  14.351 114.553  1.00  0.00      chA   
ATOM   4211  O   THR c 365      17.721  13.651 113.917  1.00  0.00      chA   
ATOM   4212  N   ASN c 366      18.016  15.136 115.550  1.00  0.00      chA   
ATOM   4213  H   ASN c 366      18.655  15.742 116.045  1.00  0.00      chA   
ATOM   4214  CA  ASN c 366      16.867  14.800 116.346  1.00  0.00      chA   
ATOM   4215  HA  ASN c 366      16.568  13.785 116.086  1.00  0.00      chA   
ATOM   4216  CB  ASN c 366      17.305  14.511 117.879  1.00  0.00      chA   
ATOM   4217  HB2 ASN c 366      16.436  14.034 118.332  1.00  0.00      chA   
ATOM   4218  HB3 ASN c 366      18.216  13.916 117.937  1.00  0.00      chA   
ATOM   4219  CG  ASN c 366      17.497  15.799 118.699  1.00  0.00      chA   
ATOM   4220  OD1 ASN c 366      17.926  16.816 118.151  1.00  0.00      chA   
ATOM   4221  ND2 ASN c 366      17.183  15.779 119.983  1.00  0.00      chA   
ATOM   4222 HD21 ASN c 366      17.192  16.635 120.519  1.00  0.00      chA   
ATOM   4223 HD22 ASN c 366      16.676  14.993 120.364  1.00  0.00      chA   
ATOM   4224  C   ASN c 366      15.683  15.806 116.303  1.00  0.00      chA   
ATOM   4225  O   ASN c 366      14.582  15.509 116.715  1.00  0.00      chA   
ATOM   4226  N   SER c 367      15.832  17.014 115.851  1.00  0.00      chA   
ATOM   4227  H   SER c 367      16.736  17.282 115.489  1.00  0.00      chA   
ATOM   4228  CA  SER c 367      14.971  18.183 116.198  1.00  0.00      chA   
ATOM   4229  HA  SER c 367      13.958  17.892 116.477  1.00  0.00      chA   
ATOM   4230  CB  SER c 367      15.586  19.021 117.336  1.00  0.00      chA   
ATOM   4231  HB2 SER c 367      14.953  19.885 117.541  1.00  0.00      chA   
ATOM   4232  HB3 SER c 367      15.668  18.415 118.239  1.00  0.00      chA   
ATOM   4233  OG  SER c 367      16.895  19.528 116.899  1.00  0.00      chA   
ATOM   4234  HG  SER c 367      17.068  20.171 117.591  1.00  0.00      chA   
ATOM   4235  C   SER c 367      14.913  19.065 114.963  1.00  0.00      chA   
ATOM   4236  O   SER c 367      15.718  18.949 114.044  1.00  0.00      chA   
ATOM   4237  N   ARG c 368      14.111  20.109 115.054  1.00  0.00      chA   
ATOM   4238  H   ARG c 368      13.418  20.046 115.785  1.00  0.00      chA   
ATOM   4239  CA  ARG c 368      14.053  21.281 114.069  1.00  0.00      chA   
ATOM   4240  HA  ARG c 368      14.156  20.934 113.040  1.00  0.00      chA   
ATOM   4241  CB  ARG c 368      12.793  22.098 114.320  1.00  0.00      chA   
ATOM   4242  HB2 ARG c 368      12.786  22.420 115.361  1.00  0.00      chA   
ATOM   4243  HB3 ARG c 368      12.808  23.008 113.721  1.00  0.00      chA   
ATOM   4244  CG  ARG c 368      11.350  21.492 114.184  1.00  0.00      chA   
ATOM   4245  HG2 ARG c 368      11.275  20.580 114.776  1.00  0.00      chA   
ATOM   4246  HG3 ARG c 368      10.705  22.280 114.574  1.00  0.00      chA   
ATOM   4247  CD  ARG c 368      11.016  21.180 112.767  1.00  0.00      chA   
ATOM   4248  HD2 ARG c 368      11.154  22.146 112.279  1.00  0.00      chA   
ATOM   4249  HD3 ARG c 368      11.786  20.526 112.360  1.00  0.00      chA   
ATOM   4250  NE  ARG c 368       9.678  20.517 112.545  1.00  0.00      chA   
ATOM   4251  HE  ARG c 368       9.558  19.580 112.905  1.00  0.00      chA   
ATOM   4252  CZ  ARG c 368       8.614  20.827 111.776  1.00  0.00      chA   
ATOM   4253  NH1 ARG c 368       7.637  19.988 111.822  1.00  0.00      chA   
ATOM   4254 HH11 ARG c 368       7.859  19.115 112.277  1.00  0.00      chA   
ATOM   4255 HH12 ARG c 368       6.785  20.217 111.328  1.00  0.00      chA   
ATOM   4256  NH2 ARG c 368       8.453  21.912 111.022  1.00  0.00      chA   
ATOM   4257 HH21 ARG c 368       9.055  22.609 111.434  1.00  0.00      chA   
ATOM   4258 HH22 ARG c 368       7.547  22.144 110.640  1.00  0.00      chA   
ATOM   4259  C   ARG c 368      15.284  22.235 114.212  1.00  0.00      chA   
ATOM   4260  O   ARG c 368      15.151  23.416 113.842  1.00  0.00      chA   
ATOM   4261  N   SER c 369      16.477  21.866 114.617  1.00  0.00      chA   
ATOM   4262  H   SER c 369      16.539  20.926 114.982  1.00  0.00      chA   
ATOM   4263  CA  SER c 369      17.589  22.763 114.879  1.00  0.00      chA   
ATOM   4264  HA  SER c 369      17.225  23.773 115.067  1.00  0.00      chA   
ATOM   4265  CB  SER c 369      18.320  22.554 116.209  1.00  0.00      chA   
ATOM   4266  HB2 SER c 369      18.654  21.525 116.337  1.00  0.00      chA   
ATOM   4267  HB3 SER c 369      19.195  23.197 116.302  1.00  0.00      chA   
ATOM   4268  OG  SER c 369      17.451  22.824 117.331  1.00  0.00      chA   
ATOM   4269  HG  SER c 369      17.623  22.163 118.005  1.00  0.00      chA   
ATOM   4270  C   SER c 369      18.690  22.838 113.860  1.00  0.00      chA   
ATOM   4271  O   SER c 369      19.148  21.844 113.358  1.00  0.00      chA   
ATOM   4272  N   GLY c 370      19.241  24.049 113.584  1.00  0.00      chA   
ATOM   4273  H   GLY c 370      18.765  24.857 113.959  1.00  0.00      chA   
ATOM   4274  CA  GLY c 370      20.201  24.269 112.460  1.00  0.00      chA   
ATOM   4275  HA2 GLY c 370      20.452  25.329 112.404  1.00  0.00      chA   
ATOM   4276  HA3 GLY c 370      21.083  23.669 112.683  1.00  0.00      chA   
ATOM   4277  C   GLY c 370      19.683  23.881 111.089  1.00  0.00      chA   
ATOM   4278  O   GLY c 370      18.673  23.200 110.832  1.00  0.00      chA   
ATOM   4279  N   PHE c 371      20.522  24.201 110.092  1.00  0.00      chA   
ATOM   4280  H   PHE c 371      21.316  24.748 110.395  1.00  0.00      chA   
ATOM   4281  CA  PHE c 371      20.294  23.858 108.697  1.00  0.00      chA   
ATOM   4282  HA  PHE c 371      19.829  22.875 108.637  1.00  0.00      chA   
ATOM   4283  CB  PHE c 371      19.276  24.770 107.993  1.00  0.00      chA   
ATOM   4284  HB2 PHE c 371      18.449  25.160 108.586  1.00  0.00      chA   
ATOM   4285  HB3 PHE c 371      19.695  25.732 107.699  1.00  0.00      chA   
ATOM   4286  CG  PHE c 371      18.656  24.159 106.787  1.00  0.00      chA   
ATOM   4287  CD1 PHE c 371      17.413  23.467 106.932  1.00  0.00      chA   
ATOM   4288  HD1 PHE c 371      17.041  23.222 107.916  1.00  0.00      chA   
ATOM   4289  CE1 PHE c 371      16.734  22.922 105.797  1.00  0.00      chA   
ATOM   4290  HE1 PHE c 371      15.888  22.268 105.956  1.00  0.00      chA   
ATOM   4291  CZ  PHE c 371      17.290  23.250 104.518  1.00  0.00      chA   
ATOM   4292  HZ  PHE c 371      16.769  22.863 103.655  1.00  0.00      chA   
ATOM   4293  CE2 PHE c 371      18.562  23.896 104.397  1.00  0.00      chA   
ATOM   4294  HE2 PHE c 371      18.961  23.928 103.394  1.00  0.00      chA   
ATOM   4295  CD2 PHE c 371      19.205  24.435 105.513  1.00  0.00      chA   
ATOM   4296  HD2 PHE c 371      20.141  24.951 105.352  1.00  0.00      chA   
ATOM   4297  C   PHE c 371      21.571  23.777 107.773  1.00  0.00      chA   
ATOM   4298  O   PHE c 371      22.602  24.429 108.092  1.00  0.00      chA   
ATOM   4299  N   GLU c 372      21.650  22.923 106.786  1.00  0.00      chA   
ATOM   4300  H   GLU c 372      20.841  22.379 106.522  1.00  0.00      chA   
ATOM   4301  CA  GLU c 372      22.889  22.682 106.035  1.00  0.00      chA   
ATOM   4302  HA  GLU c 372      23.552  23.547 106.040  1.00  0.00      chA   
ATOM   4303  CB  GLU c 372      23.420  21.561 106.894  1.00  0.00      chA   
ATOM   4304  HB2 GLU c 372      23.360  21.901 107.928  1.00  0.00      chA   
ATOM   4305  HB3 GLU c 372      22.719  20.739 106.753  1.00  0.00      chA   
ATOM   4306  CG  GLU c 372      24.843  21.031 106.540  1.00  0.00      chA   
ATOM   4307  HG2 GLU c 372      24.905  20.706 105.502  1.00  0.00      chA   
ATOM   4308  HG3 GLU c 372      25.559  21.840 106.683  1.00  0.00      chA   
ATOM   4309  CD  GLU c 372      25.096  19.780 107.398  1.00  0.00      chA   
ATOM   4310  OE1 GLU c 372      25.749  19.898 108.466  1.00  0.00      chA   
ATOM   4311  OE2 GLU c 372      24.618  18.690 107.072  1.00  0.00      chA   
ATOM   4312  C   GLU c 372      22.526  22.333 104.610  1.00  0.00      chA   
ATOM   4313  O   GLU c 372      21.412  22.157 104.256  1.00  0.00      chA   
ATOM   4314  N   MET c 373      23.588  22.367 103.752  1.00  0.00      chA   
ATOM   4315  H   MET c 373      24.489  22.577 104.157  1.00  0.00      chA   
ATOM   4316  CA  MET c 373      23.455  22.079 102.305  1.00  0.00      chA   
ATOM   4317  HA  MET c 373      22.533  21.535 102.094  1.00  0.00      chA   
ATOM   4318  CB  MET c 373      23.361  23.297 101.420  1.00  0.00      chA   
ATOM   4319  HB2 MET c 373      22.337  23.634 101.582  1.00  0.00      chA   
ATOM   4320  HB3 MET c 373      24.110  24.003 101.779  1.00  0.00      chA   
ATOM   4321  CG  MET c 373      23.597  22.959  99.951  1.00  0.00      chA   
ATOM   4322  HG2 MET c 373      23.476  23.921  99.451  1.00  0.00      chA   
ATOM   4323  HG3 MET c 373      24.576  22.511  99.790  1.00  0.00      chA   
ATOM   4324  SD  MET c 373      22.298  21.816  99.221  1.00  0.00      chA   
ATOM   4325  CE  MET c 373      20.983  22.947  98.705  1.00  0.00      chA   
ATOM   4326  HE1 MET c 373      21.339  23.852  98.214  1.00  0.00      chA   
ATOM   4327  HE2 MET c 373      20.203  22.455  98.121  1.00  0.00      chA   
ATOM   4328  HE3 MET c 373      20.529  23.266  99.643  1.00  0.00      chA   
ATOM   4329  C   MET c 373      24.627  21.142 101.966  1.00  0.00      chA   
ATOM   4330  O   MET c 373      25.811  21.508 102.281  1.00  0.00      chA   
ATOM   4331  N   ILE c 374      24.404  20.069 101.260  1.00  0.00      chA   
ATOM   4332  H   ILE c 374      23.454  19.749 101.137  1.00  0.00      chA   
ATOM   4333  CA  ILE c 374      25.447  19.085 100.960  1.00  0.00      chA   
ATOM   4334  HA  ILE c 374      26.399  19.593 101.116  1.00  0.00      chA   
ATOM   4335  CB  ILE c 374      25.523  17.843 101.935  1.00  0.00      chA   
ATOM   4336  HB  ILE c 374      26.209  17.156 101.440  1.00  0.00      chA   
ATOM   4337  CG2 ILE c 374      26.060  18.077 103.354  1.00  0.00      chA   
ATOM   4338 HG21 ILE c 374      26.449  17.143 103.760  1.00  0.00      chA   
ATOM   4339 HG22 ILE c 374      26.968  18.657 103.188  1.00  0.00      chA   
ATOM   4340 HG23 ILE c 374      25.348  18.469 104.079  1.00  0.00      chA   
ATOM   4341  CG1 ILE c 374      24.237  17.059 102.068  1.00  0.00      chA   
ATOM   4342 HG12 ILE c 374      23.598  17.627 102.743  1.00  0.00      chA   
ATOM   4343 HG13 ILE c 374      23.833  16.858 101.075  1.00  0.00      chA   
ATOM   4344  CD1 ILE c 374      24.408  15.644 102.688  1.00  0.00      chA   
ATOM   4345 HD11 ILE c 374      24.924  15.695 103.647  1.00  0.00      chA   
ATOM   4346 HD12 ILE c 374      23.425  15.219 102.887  1.00  0.00      chA   
ATOM   4347 HD13 ILE c 374      25.040  15.041 102.036  1.00  0.00      chA   
ATOM   4348  C   ILE c 374      25.398  18.644  99.488  1.00  0.00      chA   
ATOM   4349  O   ILE c 374      24.363  18.523  98.852  1.00  0.00      chA   
ATOM   4350  N   TRP c 375      26.523  18.080  99.073  1.00  0.00      chA   
ATOM   4351  H   TRP c 375      27.266  18.063  99.759  1.00  0.00      chA   
ATOM   4352  CA  TRP c 375      26.697  17.381  97.829  1.00  0.00      chA   
ATOM   4353  HA  TRP c 375      25.734  17.425  97.318  1.00  0.00      chA   
ATOM   4354  CB  TRP c 375      27.729  18.142  97.114  1.00  0.00      chA   
ATOM   4355  HB2 TRP c 375      27.532  19.202  96.955  1.00  0.00      chA   
ATOM   4356  HB3 TRP c 375      28.676  18.227  97.647  1.00  0.00      chA   
ATOM   4357  CG  TRP c 375      28.306  17.492  95.917  1.00  0.00      chA   
ATOM   4358  CD1 TRP c 375      29.635  17.177  95.762  1.00  0.00      chA   
ATOM   4359  HD1 TRP c 375      30.479  17.261  96.431  1.00  0.00      chA   
ATOM   4360  NE1 TRP c 375      29.767  16.659  94.539  1.00  0.00      chA   
ATOM   4361  HE1 TRP c 375      30.651  16.328  94.181  1.00  0.00      chA   
ATOM   4362  CE2 TRP c 375      28.595  16.584  93.881  1.00  0.00      chA   
ATOM   4363  CZ2 TRP c 375      28.373  16.182  92.519  1.00  0.00      chA   
ATOM   4364  HZ2 TRP c 375      29.239  15.878  91.951  1.00  0.00      chA   
ATOM   4365  CH2 TRP c 375      27.072  16.350  92.048  1.00  0.00      chA   
ATOM   4366  HH2 TRP c 375      26.889  16.204  90.994  1.00  0.00      chA   
ATOM   4367  CZ3 TRP c 375      25.998  16.766  92.895  1.00  0.00      chA   
ATOM   4368  HZ3 TRP c 375      24.977  16.784  92.542  1.00  0.00      chA   
ATOM   4369  CE3 TRP c 375      26.290  17.122  94.261  1.00  0.00      chA   
ATOM   4370  HE3 TRP c 375      25.491  17.539  94.855  1.00  0.00      chA   
ATOM   4371  CD2 TRP c 375      27.593  17.073  94.713  1.00  0.00      chA   
ATOM   4372  C   TRP c 375      26.958  15.898  98.037  1.00  0.00      chA   
ATOM   4373  O   TRP c 375      27.866  15.568  98.863  1.00  0.00      chA   
ATOM   4374  N   ASP c 376      26.261  15.007  97.253  1.00  0.00      chA   
ATOM   4375  H   ASP c 376      25.404  15.272  96.786  1.00  0.00      chA   
ATOM   4376  CA  ASP c 376      26.625  13.580  97.284  1.00  0.00      chA   
ATOM   4377  HA  ASP c 376      27.604  13.534  97.762  1.00  0.00      chA   
ATOM   4378  CB  ASP c 376      25.623  12.907  98.267  1.00  0.00      chA   
ATOM   4379  HB2 ASP c 376      25.800  13.345  99.249  1.00  0.00      chA   
ATOM   4380  HB3 ASP c 376      24.584  12.997  97.952  1.00  0.00      chA   
ATOM   4381  CG  ASP c 376      25.934  11.462  98.380  1.00  0.00      chA   
ATOM   4382  OD1 ASP c 376      27.013  11.180  98.942  1.00  0.00      chA   
ATOM   4383  OD2 ASP c 376      25.124  10.562  98.199  1.00  0.00      chA   
ATOM   4384  C   ASP c 376      26.627  13.074  95.865  1.00  0.00      chA   
ATOM   4385  O   ASP c 376      25.568  12.695  95.349  1.00  0.00      chA   
ATOM   4386  N   PRO c 377      27.814  12.885  95.208  1.00  0.00      chA   
ATOM   4387  CD  PRO c 377      29.169  13.372  95.621  1.00  0.00      chA   
ATOM   4388  HD2 PRO c 377      29.475  12.843  96.523  1.00  0.00      chA   
ATOM   4389  HD3 PRO c 377      29.129  14.435  95.858  1.00  0.00      chA   
ATOM   4390  CG  PRO c 377      30.088  13.131  94.429  1.00  0.00      chA   
ATOM   4391  HG2 PRO c 377      31.094  12.869  94.760  1.00  0.00      chA   
ATOM   4392  HG3 PRO c 377      30.224  14.028  93.824  1.00  0.00      chA   
ATOM   4393  CB  PRO c 377      29.453  12.012  93.667  1.00  0.00      chA   
ATOM   4394  HB2 PRO c 377      29.868  11.141  94.172  1.00  0.00      chA   
ATOM   4395  HB3 PRO c 377      29.764  11.974  92.623  1.00  0.00      chA   
ATOM   4396  CA  PRO c 377      27.983  12.151  93.936  1.00  0.00      chA   
ATOM   4397  HA  PRO c 377      27.495  12.810  93.217  1.00  0.00      chA   
ATOM   4398  C   PRO c 377      27.201  10.817  93.915  1.00  0.00      chA   
ATOM   4399  O   PRO c 377      27.136  10.097  94.875  1.00  0.00      chA   
ATOM   4400  N   ASN c 378      26.734  10.417  92.781  1.00  0.00      chA   
ATOM   4401  H   ASN c 378      26.933  11.000  91.981  1.00  0.00      chA   
ATOM   4402  CA  ASN c 378      26.055   9.133  92.503  1.00  0.00      chA   
ATOM   4403  HA  ASN c 378      25.648   9.249  91.498  1.00  0.00      chA   
ATOM   4404  CB  ASN c 378      27.086   8.031  92.372  1.00  0.00      chA   
ATOM   4405  HB2 ASN c 378      27.600   7.967  93.330  1.00  0.00      chA   
ATOM   4406  HB3 ASN c 378      26.497   7.123  92.236  1.00  0.00      chA   
ATOM   4407  CG  ASN c 378      28.103   8.176  91.262  1.00  0.00      chA   
ATOM   4408  OD1 ASN c 378      28.460   9.231  90.686  1.00  0.00      chA   
ATOM   4409  ND2 ASN c 378      28.398   7.132  90.619  1.00  0.00      chA   
ATOM   4410 HD21 ASN c 378      29.058   7.103  89.856  1.00  0.00      chA   
ATOM   4411 HD22 ASN c 378      28.077   6.278  91.055  1.00  0.00      chA   
ATOM   4412  C   ASN c 378      24.854   8.835  93.374  1.00  0.00      chA   
ATOM   4413  O   ASN c 378      24.238   7.800  93.247  1.00  0.00      chA   
ATOM   4414  N   GLY c 379      24.442   9.745  94.237  1.00  0.00      chA   
ATOM   4415  H   GLY c 379      25.006  10.564  94.409  1.00  0.00      chA   
ATOM   4416  CA  GLY c 379      23.424   9.527  95.277  1.00  0.00      chA   
ATOM   4417  HA2 GLY c 379      23.850   8.795  95.963  1.00  0.00      chA   
ATOM   4418  HA3 GLY c 379      23.279  10.522  95.698  1.00  0.00      chA   
ATOM   4419  C   GLY c 379      21.973   9.208  94.821  1.00  0.00      chA   
ATOM   4420  O   GLY c 379      21.274   8.587  95.635  1.00  0.00      chA   
ATOM   4421  N   TRP c 380      21.585   9.474  93.565  1.00  0.00      chA   
ATOM   4422  H   TRP c 380      22.199   9.843  92.855  1.00  0.00      chA   
ATOM   4423  CA  TRP c 380      20.342   8.952  92.967  1.00  0.00      chA   
ATOM   4424  HA  TRP c 380      19.478   9.229  93.570  1.00  0.00      chA   
ATOM   4425  CB  TRP c 380      20.117   9.600  91.562  1.00  0.00      chA   
ATOM   4426  HB2 TRP c 380      20.452  10.637  91.588  1.00  0.00      chA   
ATOM   4427  HB3 TRP c 380      20.771   9.145  90.818  1.00  0.00      chA   
ATOM   4428  CG  TRP c 380      18.696   9.688  91.191  1.00  0.00      chA   
ATOM   4429  CD1 TRP c 380      18.038   8.899  90.339  1.00  0.00      chA   
ATOM   4430  HD1 TRP c 380      18.441   8.019  89.863  1.00  0.00      chA   
ATOM   4431  NE1 TRP c 380      16.704   9.232  90.179  1.00  0.00      chA   
ATOM   4432  HE1 TRP c 380      16.008   8.779  89.605  1.00  0.00      chA   
ATOM   4433  CE2 TRP c 380      16.465  10.412  90.952  1.00  0.00      chA   
ATOM   4434  CZ2 TRP c 380      15.373  11.204  91.177  1.00  0.00      chA   
ATOM   4435  HZ2 TRP c 380      14.498  11.102  90.551  1.00  0.00      chA   
ATOM   4436  CH2 TRP c 380      15.383  12.201  92.170  1.00  0.00      chA   
ATOM   4437  HH2 TRP c 380      14.531  12.844  92.333  1.00  0.00      chA   
ATOM   4438  CZ3 TRP c 380      16.557  12.431  92.851  1.00  0.00      chA   
ATOM   4439  HZ3 TRP c 380      16.501  13.219  93.587  1.00  0.00      chA   
ATOM   4440  CE3 TRP c 380      17.695  11.675  92.631  1.00  0.00      chA   
ATOM   4441  HE3 TRP c 380      18.537  11.903  93.268  1.00  0.00      chA   
ATOM   4442  CD2 TRP c 380      17.678  10.631  91.642  1.00  0.00      chA   
ATOM   4443  C   TRP c 380      20.326   7.402  92.964  1.00  0.00      chA   
ATOM   4444  O   TRP c 380      19.190   6.919  93.011  1.00  0.00      chA   
ATOM   4445  N   THR c 381      21.433   6.608  93.013  1.00  0.00      chA   
ATOM   4446  H   THR c 381      22.330   7.061  93.112  1.00  0.00      chA   
ATOM   4447  CA  THR c 381      21.536   5.144  92.695  1.00  0.00      chA   
ATOM   4448  HA  THR c 381      20.542   4.783  92.963  1.00  0.00      chA   
ATOM   4449  CB  THR c 381      21.587   4.853  91.140  1.00  0.00      chA   
ATOM   4450  HB  THR c 381      21.616   3.780  90.949  1.00  0.00      chA   
ATOM   4451  CG2 THR c 381      20.407   5.484  90.338  1.00  0.00      chA   
ATOM   4452 HG21 THR c 381      20.536   5.240  89.284  1.00  0.00      chA   
ATOM   4453 HG22 THR c 381      19.523   4.959  90.701  1.00  0.00      chA   
ATOM   4454 HG23 THR c 381      20.322   6.567  90.429  1.00  0.00      chA   
ATOM   4455  OG1 THR c 381      22.821   5.266  90.640  1.00  0.00      chA   
ATOM   4456  HG1 THR c 381      22.880   6.221  90.579  1.00  0.00      chA   
ATOM   4457  C   THR c 381      22.666   4.401  93.328  1.00  0.00      chA   
ATOM   4458  O   THR c 381      22.799   3.202  93.156  1.00  0.00      chA   
ATOM   4459  N   GLU c 382      23.459   5.010  94.158  1.00  0.00      chA   
ATOM   4460  H   GLU c 382      23.306   6.002  94.274  1.00  0.00      chA   
ATOM   4461  CA  GLU c 382      24.633   4.528  94.827  1.00  0.00      chA   
ATOM   4462  HA  GLU c 382      24.580   3.450  94.987  1.00  0.00      chA   
ATOM   4463  CB  GLU c 382      25.987   4.723  94.029  1.00  0.00      chA   
ATOM   4464  HB2 GLU c 382      26.229   5.785  93.995  1.00  0.00      chA   
ATOM   4465  HB3 GLU c 382      26.764   4.141  94.523  1.00  0.00      chA   
ATOM   4466  CG  GLU c 382      25.936   4.172  92.568  1.00  0.00      chA   
ATOM   4467  HG2 GLU c 382      25.390   3.233  92.651  1.00  0.00      chA   
ATOM   4468  HG3 GLU c 382      25.512   4.932  91.912  1.00  0.00      chA   
ATOM   4469  CD  GLU c 382      27.334   3.763  92.130  1.00  0.00      chA   
ATOM   4470  OE1 GLU c 382      28.144   4.739  91.894  1.00  0.00      chA   
ATOM   4471  OE2 GLU c 382      27.572   2.562  91.887  1.00  0.00      chA   
ATOM   4472  C   GLU c 382      24.804   5.189  96.190  1.00  0.00      chA   
ATOM   4473  O   GLU c 382      24.086   6.141  96.470  1.00  0.00      chA   
ATOM   4474  N   THR c 383      25.584   4.529  97.062  1.00  0.00      chA   
ATOM   4475  H   THR c 383      26.047   3.691  96.743  1.00  0.00      chA   
ATOM   4476  CA  THR c 383      25.753   4.824  98.466  1.00  0.00      chA   
ATOM   4477  HA  THR c 383      25.396   5.794  98.815  1.00  0.00      chA   
ATOM   4478  CB  THR c 383      24.963   3.741  99.309  1.00  0.00      chA   
ATOM   4479  HB  THR c 383      25.342   2.731  99.160  1.00  0.00      chA   
ATOM   4480  CG2 THR c 383      24.845   3.874 100.772  1.00  0.00      chA   
ATOM   4481 HG21 THR c 383      25.764   3.619 101.300  1.00  0.00      chA   
ATOM   4482 HG22 THR c 383      24.517   4.868 101.075  1.00  0.00      chA   
ATOM   4483 HG23 THR c 383      24.118   3.168 101.172  1.00  0.00      chA   
ATOM   4484  OG1 THR c 383      23.648   3.750  98.791  1.00  0.00      chA   
ATOM   4485  HG1 THR c 383      23.270   4.618  98.943  1.00  0.00      chA   
ATOM   4486  C   THR c 383      27.232   4.772  98.859  1.00  0.00      chA   
ATOM   4487  O   THR c 383      27.509   4.745 100.066  1.00  0.00      chA   
ATOM   4488  N   ASP c 384      28.174   4.838  97.917  1.00  0.00      chA   
ATOM   4489  H   ASP c 384      27.847   5.010  96.977  1.00  0.00      chA   
ATOM   4490  CA  ASP c 384      29.575   4.963  98.128  1.00  0.00      chA   
ATOM   4491  HA  ASP c 384      29.861   5.418  99.076  1.00  0.00      chA   
ATOM   4492  CB  ASP c 384      30.239   3.557  98.068  1.00  0.00      chA   
ATOM   4493  HB2 ASP c 384      29.679   2.810  98.631  1.00  0.00      chA   
ATOM   4494  HB3 ASP c 384      30.247   3.265  97.018  1.00  0.00      chA   
ATOM   4495  CG  ASP c 384      31.729   3.578  98.620  1.00  0.00      chA   
ATOM   4496  OD1 ASP c 384      31.977   4.010  99.768  1.00  0.00      chA   
ATOM   4497  OD2 ASP c 384      32.657   3.330  97.802  1.00  0.00      chA   
ATOM   4498  C   ASP c 384      30.263   6.001  97.233  1.00  0.00      chA   
ATOM   4499  O   ASP c 384      30.524   5.619  96.067  1.00  0.00      chA   
ATOM   4500  N   SER c 385      30.415   7.247  97.690  1.00  0.00      chA   
ATOM   4501  H   SER c 385      30.333   7.315  98.695  1.00  0.00      chA   
ATOM   4502  CA  SER c 385      30.515   8.537  96.853  1.00  0.00      chA   
ATOM   4503  HA  SER c 385      30.361   8.251  95.811  1.00  0.00      chA   
ATOM   4504  CB  SER c 385      29.359   9.468  97.177  1.00  0.00      chA   
ATOM   4505  HB2 SER c 385      28.976  10.053  96.341  1.00  0.00      chA   
ATOM   4506  HB3 SER c 385      28.518   8.861  97.510  1.00  0.00      chA   
ATOM   4507  OG  SER c 385      29.531  10.275  98.264  1.00  0.00      chA   
ATOM   4508  HG  SER c 385      28.634  10.554  98.459  1.00  0.00      chA   
ATOM   4509  C   SER c 385      31.864   9.251  96.991  1.00  0.00      chA   
ATOM   4510  O   SER c 385      32.580   9.158  97.984  1.00  0.00      chA   
ATOM   4511  N   SER c 386      32.278  10.072  96.003  1.00  0.00      chA   
ATOM   4512  H   SER c 386      31.723  10.084  95.159  1.00  0.00      chA   
ATOM   4513  CA  SER c 386      33.452  10.983  95.980  1.00  0.00      chA   
ATOM   4514  HA  SER c 386      34.240  10.465  96.524  1.00  0.00      chA   
ATOM   4515  CB  SER c 386      34.022  11.243  94.617  1.00  0.00      chA   
ATOM   4516  HB2 SER c 386      33.224  11.620  93.977  1.00  0.00      chA   
ATOM   4517  HB3 SER c 386      34.858  11.941  94.636  1.00  0.00      chA   
ATOM   4518  OG  SER c 386      34.446  10.064  93.941  1.00  0.00      chA   
ATOM   4519  HG  SER c 386      35.070  10.371  93.280  1.00  0.00      chA   
ATOM   4520  C   SER c 386      33.108  12.308  96.727  1.00  0.00      chA   
ATOM   4521  O   SER c 386      33.198  13.400  96.182  1.00  0.00      chA   
ATOM   4522  N   PHE c 387      32.511  12.235  97.923  1.00  0.00      chA   
ATOM   4523  H   PHE c 387      32.216  11.327  98.256  1.00  0.00      chA   
ATOM   4524  CA  PHE c 387      32.229  13.360  98.819  1.00  0.00      chA   
ATOM   4525  HA  PHE c 387      31.585  13.946  98.163  1.00  0.00      chA   
ATOM   4526  CB  PHE c 387      31.556  12.687 100.024  1.00  0.00      chA   
ATOM   4527  HB2 PHE c 387      30.784  12.042  99.605  1.00  0.00      chA   
ATOM   4528  HB3 PHE c 387      32.262  12.117 100.629  1.00  0.00      chA   
ATOM   4529  CG  PHE c 387      30.755  13.567 100.936  1.00  0.00      chA   
ATOM   4530  CD1 PHE c 387      29.353  13.626 100.719  1.00  0.00      chA   
ATOM   4531  HD1 PHE c 387      28.842  13.038  99.972  1.00  0.00      chA   
ATOM   4532  CE1 PHE c 387      28.618  14.410 101.635  1.00  0.00      chA   
ATOM   4533  HE1 PHE c 387      27.558  14.507 101.451  1.00  0.00      chA   
ATOM   4534  CZ  PHE c 387      29.188  15.352 102.491  1.00  0.00      chA   
ATOM   4535  HZ  PHE c 387      28.616  16.087 103.038  1.00  0.00      chA   
ATOM   4536  CE2 PHE c 387      30.595  15.335 102.653  1.00  0.00      chA   
ATOM   4537  HE2 PHE c 387      31.083  16.102 103.236  1.00  0.00      chA   
ATOM   4538  CD2 PHE c 387      31.349  14.444 101.824  1.00  0.00      chA   
ATOM   4539  HD2 PHE c 387      32.425  14.358 101.784  1.00  0.00      chA   
ATOM   4540  C   PHE c 387      33.459  14.080  99.294  1.00  0.00      chA   
ATOM   4541  O   PHE c 387      34.570  13.539  99.490  1.00  0.00      chA   
ATOM   4542  N   SER c 388      33.288  15.424  99.363  1.00  0.00      chA   
ATOM   4543  H   SER c 388      32.342  15.731  99.192  1.00  0.00      chA   
ATOM   4544  CA  SER c 388      34.447  16.312  99.629  1.00  0.00      chA   
ATOM   4545  HA  SER c 388      34.944  15.907 100.510  1.00  0.00      chA   
ATOM   4546  CB  SER c 388      35.262  16.443  98.332  1.00  0.00      chA   
ATOM   4547  HB2 SER c 388      36.208  16.958  98.502  1.00  0.00      chA   
ATOM   4548  HB3 SER c 388      35.573  15.488  97.909  1.00  0.00      chA   
ATOM   4549  OG  SER c 388      34.543  17.117  97.293  1.00  0.00      chA   
ATOM   4550  HG  SER c 388      35.231  17.412  96.693  1.00  0.00      chA   
ATOM   4551  C   SER c 388      34.025  17.758 100.043  1.00  0.00      chA   
ATOM   4552  O   SER c 388      34.862  18.522 100.560  1.00  0.00      chA   
ATOM   4553  N   VAL c 389      32.841  18.173  99.679  1.00  0.00      chA   
ATOM   4554  H   VAL c 389      32.078  17.612  99.326  1.00  0.00      chA   
ATOM   4555  CA  VAL c 389      32.498  19.620 100.022  1.00  0.00      chA   
ATOM   4556  HA  VAL c 389      33.143  20.035 100.797  1.00  0.00      chA   
ATOM   4557  CB  VAL c 389      32.571  20.475  98.705  1.00  0.00      chA   
ATOM   4558  HB  VAL c 389      32.033  21.375  99.003  1.00  0.00      chA   
ATOM   4559  CG1 VAL c 389      34.052  20.809  98.397  1.00  0.00      chA   
ATOM   4560 HG11 VAL c 389      34.522  21.226  99.287  1.00  0.00      chA   
ATOM   4561 HG12 VAL c 389      34.570  19.922  98.031  1.00  0.00      chA   
ATOM   4562 HG13 VAL c 389      34.193  21.514  97.579  1.00  0.00      chA   
ATOM   4563  CG2 VAL c 389      31.946  19.855  97.407  1.00  0.00      chA   
ATOM   4564 HG21 VAL c 389      32.390  18.877  97.219  1.00  0.00      chA   
ATOM   4565 HG22 VAL c 389      30.880  19.637  97.480  1.00  0.00      chA   
ATOM   4566 HG23 VAL c 389      32.150  20.596  96.634  1.00  0.00      chA   
ATOM   4567  C   VAL c 389      31.067  19.668 100.539  1.00  0.00      chA   
ATOM   4568  O   VAL c 389      30.149  19.021  99.999  1.00  0.00      chA   
ATOM   4569  N   LYS c 390      30.789  20.619 101.486  1.00  0.00      chA   
ATOM   4570  H   LYS c 390      31.538  21.145 101.911  1.00  0.00      chA   
ATOM   4571  CA  LYS c 390      29.509  20.921 102.082  1.00  0.00      chA   
ATOM   4572  HA  LYS c 390      28.706  20.748 101.365  1.00  0.00      chA   
ATOM   4573  CB  LYS c 390      29.239  19.903 103.230  1.00  0.00      chA   
ATOM   4574  HB2 LYS c 390      28.362  20.256 103.773  1.00  0.00      chA   
ATOM   4575  HB3 LYS c 390      29.013  18.895 102.882  1.00  0.00      chA   
ATOM   4576  CG  LYS c 390      30.366  19.948 104.299  1.00  0.00      chA   
ATOM   4577  HG2 LYS c 390      31.275  19.513 103.884  1.00  0.00      chA   
ATOM   4578  HG3 LYS c 390      30.618  20.977 104.555  1.00  0.00      chA   
ATOM   4579  CD  LYS c 390      29.970  19.060 105.585  1.00  0.00      chA   
ATOM   4580  HD2 LYS c 390      28.955  19.272 105.924  1.00  0.00      chA   
ATOM   4581  HD3 LYS c 390      29.987  18.020 105.257  1.00  0.00      chA   
ATOM   4582  CE  LYS c 390      30.989  19.043 106.788  1.00  0.00      chA   
ATOM   4583  HE2 LYS c 390      31.968  18.805 106.373  1.00  0.00      chA   
ATOM   4584  HE3 LYS c 390      31.141  20.034 107.214  1.00  0.00      chA   
ATOM   4585  NZ  LYS c 390      30.744  18.092 107.849  1.00  0.00      chA   
ATOM   4586  HZ1 LYS c 390      31.456  18.255 108.547  1.00  0.00      chA   
ATOM   4587  HZ2 LYS c 390      29.826  18.289 108.219  1.00  0.00      chA   
ATOM   4588  HZ3 LYS c 390      30.806  17.143 107.508  1.00  0.00      chA   
ATOM   4589  C   LYS c 390      29.476  22.345 102.640  1.00  0.00      chA   
ATOM   4590  O   LYS c 390      30.497  23.073 102.582  1.00  0.00      chA   
ATOM   4591  N   GLN c 391      28.262  22.778 103.004  1.00  0.00      chA   
ATOM   4592  H   GLN c 391      27.536  22.091 102.854  1.00  0.00      chA   
ATOM   4593  CA  GLN c 391      27.908  24.193 103.363  1.00  0.00      chA   
ATOM   4594  HA  GLN c 391      28.863  24.659 103.605  1.00  0.00      chA   
ATOM   4595  CB  GLN c 391      27.483  24.985 102.100  1.00  0.00      chA   
ATOM   4596  HB2 GLN c 391      28.243  24.800 101.343  1.00  0.00      chA   
ATOM   4597  HB3 GLN c 391      26.511  24.657 101.731  1.00  0.00      chA   
ATOM   4598  CG  GLN c 391      27.642  26.537 102.170  1.00  0.00      chA   
ATOM   4599  HG2 GLN c 391      27.117  26.893 103.057  1.00  0.00      chA   
ATOM   4600  HG3 GLN c 391      28.631  26.914 102.427  1.00  0.00      chA   
ATOM   4601  CD  GLN c 391      27.132  27.376 100.994  1.00  0.00      chA   
ATOM   4602  OE1 GLN c 391      26.805  26.882  99.914  1.00  0.00      chA   
ATOM   4603  NE2 GLN c 391      27.221  28.690 101.093  1.00  0.00      chA   
ATOM   4604 HE21 GLN c 391      26.955  29.156 100.238  1.00  0.00      chA   
ATOM   4605 HE22 GLN c 391      27.597  29.206 101.875  1.00  0.00      chA   
ATOM   4606  C   GLN c 391      26.983  24.332 104.574  1.00  0.00      chA   
ATOM   4607  O   GLN c 391      25.993  23.648 104.612  1.00  0.00      chA   
ATOM   4608  N   ASP c 392      27.214  25.285 105.471  1.00  0.00      chA   
ATOM   4609  H   ASP c 392      28.028  25.851 105.277  1.00  0.00      chA   
ATOM   4610  CA  ASP c 392      26.386  25.516 106.645  1.00  0.00      chA   
ATOM   4611  HA  ASP c 392      25.801  24.652 106.957  1.00  0.00      chA   
ATOM   4612  CB  ASP c 392      27.414  25.896 107.828  1.00  0.00      chA   
ATOM   4613  HB2 ASP c 392      28.099  26.695 107.543  1.00  0.00      chA   
ATOM   4614  HB3 ASP c 392      26.963  26.218 108.768  1.00  0.00      chA   
ATOM   4615  CG  ASP c 392      28.147  24.536 108.001  1.00  0.00      chA   
ATOM   4616  OD1 ASP c 392      29.395  24.443 107.784  1.00  0.00      chA   
ATOM   4617  OD2 ASP c 392      27.503  23.532 108.322  1.00  0.00      chA   
ATOM   4618  C   ASP c 392      25.509  26.722 106.511  1.00  0.00      chA   
ATOM   4619  O   ASP c 392      25.966  27.693 105.919  1.00  0.00      chA   
ATOM   4620  N   ILE c 393      24.282  26.725 107.042  1.00  0.00      chA   
ATOM   4621  H   ILE c 393      23.900  25.950 107.566  1.00  0.00      chA   
ATOM   4622  CA  ILE c 393      23.256  27.759 106.728  1.00  0.00      chA   
ATOM   4623  HA  ILE c 393      23.613  28.661 106.231  1.00  0.00      chA   
ATOM   4624  CB  ILE c 393      22.278  27.179 105.654  1.00  0.00      chA   
ATOM   4625  HB  ILE c 393      21.671  26.371 106.061  1.00  0.00      chA   
ATOM   4626  CG2 ILE c 393      21.170  28.180 105.323  1.00  0.00      chA   
ATOM   4627 HG21 ILE c 393      21.585  29.109 104.932  1.00  0.00      chA   
ATOM   4628 HG22 ILE c 393      20.558  27.632 104.607  1.00  0.00      chA   
ATOM   4629 HG23 ILE c 393      20.624  28.511 106.207  1.00  0.00      chA   
ATOM   4630  CG1 ILE c 393      22.876  26.643 104.322  1.00  0.00      chA   
ATOM   4631 HG12 ILE c 393      23.521  25.815 104.617  1.00  0.00      chA   
ATOM   4632 HG13 ILE c 393      22.140  26.129 103.702  1.00  0.00      chA   
ATOM   4633  CD1 ILE c 393      23.766  27.642 103.428  1.00  0.00      chA   
ATOM   4634 HD11 ILE c 393      24.571  28.060 104.031  1.00  0.00      chA   
ATOM   4635 HD12 ILE c 393      24.146  27.085 102.572  1.00  0.00      chA   
ATOM   4636 HD13 ILE c 393      23.105  28.441 103.090  1.00  0.00      chA   
ATOM   4637  C   ILE c 393      22.534  28.236 108.012  1.00  0.00      chA   
ATOM   4638  O   ILE c 393      22.018  29.361 108.094  1.00  0.00      chA   
ATOM   4639  N   VAL c 394      22.369  27.402 109.045  1.00  0.00      chA   
ATOM   4640  H   VAL c 394      22.728  26.465 108.932  1.00  0.00      chA   
ATOM   4641  CA  VAL c 394      21.784  27.751 110.361  1.00  0.00      chA   
ATOM   4642  HA  VAL c 394      22.040  28.788 110.580  1.00  0.00      chA   
ATOM   4643  CB  VAL c 394      20.254  27.692 110.393  1.00  0.00      chA   
ATOM   4644  HB  VAL c 394      19.914  26.657 110.418  1.00  0.00      chA   
ATOM   4645  CG1 VAL c 394      19.734  28.293 111.681  1.00  0.00      chA   
ATOM   4646 HG11 VAL c 394      20.063  27.622 112.474  1.00  0.00      chA   
ATOM   4647 HG12 VAL c 394      20.206  29.260 111.849  1.00  0.00      chA   
ATOM   4648 HG13 VAL c 394      18.648  28.297 111.775  1.00  0.00      chA   
ATOM   4649  CG2 VAL c 394      19.484  28.498 109.365  1.00  0.00      chA   
ATOM   4650 HG21 VAL c 394      18.429  28.466 109.636  1.00  0.00      chA   
ATOM   4651 HG22 VAL c 394      19.613  29.580 109.339  1.00  0.00      chA   
ATOM   4652 HG23 VAL c 394      19.630  28.085 108.367  1.00  0.00      chA   
ATOM   4653  C   VAL c 394      22.397  26.829 111.467  1.00  0.00      chA   
ATOM   4654  O   VAL c 394      22.576  25.602 111.360  1.00  0.00      chA   
ATOM   4655  N   ALA c 395      22.760  27.377 112.627  1.00  0.00      chA   
ATOM   4656  H   ALA c 395      22.473  28.317 112.861  1.00  0.00      chA   
ATOM   4657  CA  ALA c 395      23.514  26.656 113.601  1.00  0.00      chA   
ATOM   4658  HA  ALA c 395      24.226  25.943 113.184  1.00  0.00      chA   
ATOM   4659  CB  ALA c 395      24.324  27.649 114.338  1.00  0.00      chA   
ATOM   4660  HB1 ALA c 395      23.623  28.371 114.759  1.00  0.00      chA   
ATOM   4661  HB2 ALA c 395      24.849  27.069 115.098  1.00  0.00      chA   
ATOM   4662  HB3 ALA c 395      25.038  28.035 113.612  1.00  0.00      chA   
ATOM   4663  C   ALA c 395      22.520  25.945 114.441  1.00  0.00      chA   
ATOM   4664  O   ALA c 395      21.444  26.491 114.713  1.00  0.00      chA   
ATOM   4665  N   ILE c 396      22.932  24.732 114.974  1.00  0.00      chA   
ATOM   4666  H   ILE c 396      23.863  24.456 114.699  1.00  0.00      chA   
ATOM   4667  CA  ILE c 396      22.216  23.781 115.915  1.00  0.00      chA   
ATOM   4668  HA  ILE c 396      21.264  23.560 115.431  1.00  0.00      chA   
ATOM   4669  CB  ILE c 396      23.011  22.507 116.118  1.00  0.00      chA   
ATOM   4670  HB  ILE c 396      22.325  21.810 116.599  1.00  0.00      chA   
ATOM   4671  CG2 ILE c 396      23.382  21.983 114.784  1.00  0.00      chA   
ATOM   4672 HG21 ILE c 396      23.627  20.937 114.963  1.00  0.00      chA   
ATOM   4673 HG22 ILE c 396      22.506  22.038 114.136  1.00  0.00      chA   
ATOM   4674 HG23 ILE c 396      24.149  22.659 114.403  1.00  0.00      chA   
ATOM   4675  CG1 ILE c 396      24.247  22.592 117.052  1.00  0.00      chA   
ATOM   4676 HG12 ILE c 396      24.976  21.822 116.803  1.00  0.00      chA   
ATOM   4677 HG13 ILE c 396      24.630  23.576 116.778  1.00  0.00      chA   
ATOM   4678  CD1 ILE c 396      24.044  22.535 118.554  1.00  0.00      chA   
ATOM   4679 HD11 ILE c 396      25.022  22.468 119.030  1.00  0.00      chA   
ATOM   4680 HD12 ILE c 396      23.523  23.385 118.992  1.00  0.00      chA   
ATOM   4681 HD13 ILE c 396      23.568  21.659 118.994  1.00  0.00      chA   
ATOM   4682  C   ILE c 396      21.713  24.356 117.212  1.00  0.00      chA   
ATOM   4683  O   ILE c 396      20.980  23.538 117.909  1.00  0.00      chA   
ATOM   4684  N   THR c 397      22.010  25.621 117.566  1.00  0.00      chA   
ATOM   4685  H   THR c 397      22.687  26.157 117.042  1.00  0.00      chA   
ATOM   4686  CA  THR c 397      21.494  26.321 118.705  1.00  0.00      chA   
ATOM   4687  HA  THR c 397      21.404  25.649 119.558  1.00  0.00      chA   
ATOM   4688  CB  THR c 397      22.474  27.517 118.942  1.00  0.00      chA   
ATOM   4689  HB  THR c 397      21.999  28.348 119.464  1.00  0.00      chA   
ATOM   4690  CG2 THR c 397      23.516  27.093 119.946  1.00  0.00      chA   
ATOM   4691 HG21 THR c 397      24.153  26.262 119.640  1.00  0.00      chA   
ATOM   4692 HG22 THR c 397      24.160  27.888 120.321  1.00  0.00      chA   
ATOM   4693 HG23 THR c 397      23.022  26.711 120.840  1.00  0.00      chA   
ATOM   4694  OG1 THR c 397      23.199  27.897 117.811  1.00  0.00      chA   
ATOM   4695  HG1 THR c 397      22.690  28.622 117.438  1.00  0.00      chA   
ATOM   4696  C   THR c 397      20.115  26.954 118.313  1.00  0.00      chA   
ATOM   4697  O   THR c 397      19.400  27.358 119.251  1.00  0.00      chA   
ATOM   4698  N   ASP c 398      19.653  26.992 117.052  1.00  0.00      chA   
ATOM   4699  H   ASP c 398      20.310  26.655 116.362  1.00  0.00      chA   
ATOM   4700  CA  ASP c 398      18.547  27.852 116.612  1.00  0.00      chA   
ATOM   4701  HA  ASP c 398      17.915  28.082 117.470  1.00  0.00      chA   
ATOM   4702  CB  ASP c 398      19.059  29.084 115.851  1.00  0.00      chA   
ATOM   4703  HB2 ASP c 398      19.583  28.774 114.946  1.00  0.00      chA   
ATOM   4704  HB3 ASP c 398      18.257  29.804 115.683  1.00  0.00      chA   
ATOM   4705  CG  ASP c 398      19.915  29.940 116.737  1.00  0.00      chA   
ATOM   4706  OD1 ASP c 398      19.424  30.578 117.670  1.00  0.00      chA   
ATOM   4707  OD2 ASP c 398      21.156  29.845 116.691  1.00  0.00      chA   
ATOM   4708  C   ASP c 398      17.578  27.082 115.646  1.00  0.00      chA   
ATOM   4709  O   ASP c 398      17.999  26.393 114.686  1.00  0.00      chA   
ATOM   4710  N   TRP c 399      16.215  27.204 115.853  1.00  0.00      chA   
ATOM   4711  H   TRP c 399      15.861  27.903 116.491  1.00  0.00      chA   
ATOM   4712  CA  TRP c 399      15.158  26.439 115.127  1.00  0.00      chA   
ATOM   4713  HA  TRP c 399      15.370  25.384 115.305  1.00  0.00      chA   
ATOM   4714  CB  TRP c 399      13.776  26.609 115.792  1.00  0.00      chA   
ATOM   4715  HB2 TRP c 399      13.152  27.445 115.477  1.00  0.00      chA   
ATOM   4716  HB3 TRP c 399      13.099  25.902 115.312  1.00  0.00      chA   
ATOM   4717  CG  TRP c 399      13.546  26.437 117.263  1.00  0.00      chA   
ATOM   4718  CD1 TRP c 399      13.018  27.318 118.160  1.00  0.00      chA   
ATOM   4719  HD1 TRP c 399      12.683  28.318 117.932  1.00  0.00      chA   
ATOM   4720  NE1 TRP c 399      12.638  26.695 119.327  1.00  0.00      chA   
ATOM   4721  HE1 TRP c 399      12.209  27.136 120.128  1.00  0.00      chA   
ATOM   4722  CE2 TRP c 399      13.301  25.446 119.339  1.00  0.00      chA   
ATOM   4723  CZ2 TRP c 399      13.419  24.503 120.366  1.00  0.00      chA   
ATOM   4724  HZ2 TRP c 399      13.304  24.788 121.401  1.00  0.00      chA   
ATOM   4725  CH2 TRP c 399      13.940  23.247 120.016  1.00  0.00      chA   
ATOM   4726  HH2 TRP c 399      13.954  22.537 120.830  1.00  0.00      chA   
ATOM   4727  CZ3 TRP c 399      14.387  22.897 118.740  1.00  0.00      chA   
ATOM   4728  HZ3 TRP c 399      14.751  21.902 118.531  1.00  0.00      chA   
ATOM   4729  CE3 TRP c 399      14.117  23.840 117.721  1.00  0.00      chA   
ATOM   4730  HE3 TRP c 399      14.487  23.615 116.732  1.00  0.00      chA   
ATOM   4731  CD2 TRP c 399      13.593  25.129 118.014  1.00  0.00      chA   
ATOM   4732  C   TRP c 399      15.042  26.821 113.673  1.00  0.00      chA   
ATOM   4733  O   TRP c 399      14.554  27.909 113.336  1.00  0.00      chA   
ATOM   4734  N   SER c 400      15.392  25.918 112.762  1.00  0.00      chA   
ATOM   4735  H   SER c 400      15.728  25.014 113.061  1.00  0.00      chA   
ATOM   4736  CA  SER c 400      15.290  26.168 111.302  1.00  0.00      chA   
ATOM   4737  HA  SER c 400      14.457  26.829 111.067  1.00  0.00      chA   
ATOM   4738  CB  SER c 400      16.551  26.879 110.772  1.00  0.00      chA   
ATOM   4739  HB2 SER c 400      16.484  27.154 109.719  1.00  0.00      chA   
ATOM   4740  HB3 SER c 400      16.682  27.806 111.330  1.00  0.00      chA   
ATOM   4741  OG  SER c 400      17.638  26.045 110.967  1.00  0.00      chA   
ATOM   4742  HG  SER c 400      17.550  25.263 110.416  1.00  0.00      chA   
ATOM   4743  C   SER c 400      15.077  24.900 110.557  1.00  0.00      chA   
ATOM   4744  O   SER c 400      15.710  24.687 109.497  1.00  0.00      chA   
ATOM   4745  N   GLY c 401      14.072  24.015 110.918  1.00  0.00      chA   
ATOM   4746  H   GLY c 401      13.632  24.176 111.813  1.00  0.00      chA   
ATOM   4747  CA  GLY c 401      14.250  22.653 110.468  1.00  0.00      chA   
ATOM   4748  HA2 GLY c 401      15.199  22.586 109.935  1.00  0.00      chA   
ATOM   4749  HA3 GLY c 401      14.487  22.034 111.333  1.00  0.00      chA   
ATOM   4750  C   GLY c 401      13.135  22.107 109.586  1.00  0.00      chA   
ATOM   4751  O   GLY c 401      12.652  21.055 109.967  1.00  0.00      chA   
ATOM   4752  N   TYR c 402      12.803  22.836 108.517  1.00  0.00      chA   
ATOM   4753  H   TYR c 402      13.315  23.692 108.352  1.00  0.00      chA   
ATOM   4754  CA  TYR c 402      11.735  22.632 107.563  1.00  0.00      chA   
ATOM   4755  HA  TYR c 402      11.814  21.628 107.149  1.00  0.00      chA   
ATOM   4756  CB  TYR c 402      10.426  22.892 108.251  1.00  0.00      chA   
ATOM   4757  HB2 TYR c 402      10.384  22.154 109.051  1.00  0.00      chA   
ATOM   4758  HB3 TYR c 402      10.439  23.901 108.664  1.00  0.00      chA   
ATOM   4759  CG  TYR c 402       9.186  22.981 107.412  1.00  0.00      chA   
ATOM   4760  CD1 TYR c 402       8.218  21.977 107.423  1.00  0.00      chA   
ATOM   4761  HD1 TYR c 402       8.427  21.179 108.121  1.00  0.00      chA   
ATOM   4762  CE1 TYR c 402       7.009  22.063 106.752  1.00  0.00      chA   
ATOM   4763  HE1 TYR c 402       6.206  21.348 106.854  1.00  0.00      chA   
ATOM   4764  CZ  TYR c 402       6.771  23.263 106.085  1.00  0.00      chA   
ATOM   4765  OH  TYR c 402       5.736  23.377 105.277  1.00  0.00      chA   
ATOM   4766  HH  TYR c 402       5.632  24.235 104.860  1.00  0.00      chA   
ATOM   4767  CE2 TYR c 402       7.708  24.345 106.103  1.00  0.00      chA   
ATOM   4768  HE2 TYR c 402       7.458  25.227 105.532  1.00  0.00      chA   
ATOM   4769  CD2 TYR c 402       8.949  24.181 106.704  1.00  0.00      chA   
ATOM   4770  HD2 TYR c 402       9.638  25.011 106.655  1.00  0.00      chA   
ATOM   4771  C   TYR c 402      11.932  23.565 106.359  1.00  0.00      chA   
ATOM   4772  O   TYR c 402      12.285  24.738 106.473  1.00  0.00      chA   
ATOM   4773  N   SER c 403      11.869  23.007 105.155  1.00  0.00      chA   
ATOM   4774  H   SER c 403      11.588  22.050 104.997  1.00  0.00      chA   
ATOM   4775  CA  SER c 403      12.389  23.697 103.946  1.00  0.00      chA   
ATOM   4776  HA  SER c 403      12.346  24.783 104.014  1.00  0.00      chA   
ATOM   4777  CB  SER c 403      13.875  23.411 103.902  1.00  0.00      chA   
ATOM   4778  HB2 SER c 403      14.310  23.873 103.015  1.00  0.00      chA   
ATOM   4779  HB3 SER c 403      14.448  23.814 104.737  1.00  0.00      chA   
ATOM   4780  OG  SER c 403      14.189  22.011 103.685  1.00  0.00      chA   
ATOM   4781  HG  SER c 403      14.007  21.521 104.490  1.00  0.00      chA   
ATOM   4782  C   SER c 403      11.739  23.212 102.670  1.00  0.00      chA   
ATOM   4783  O   SER c 403      11.090  22.163 102.715  1.00  0.00      chA   
ATOM   4784  N   GLY c 404      11.986  23.895 101.627  1.00  0.00      chA   
ATOM   4785  H   GLY c 404      12.626  24.675 101.693  1.00  0.00      chA   
ATOM   4786  CA  GLY c 404      11.445  23.439 100.311  1.00  0.00      chA   
ATOM   4787  HA2 GLY c 404      11.683  22.383 100.182  1.00  0.00      chA   
ATOM   4788  HA3 GLY c 404      10.385  23.644 100.162  1.00  0.00      chA   
ATOM   4789  C   GLY c 404      12.278  24.014  99.188  1.00  0.00      chA   
ATOM   4790  O   GLY c 404      13.298  24.728  99.315  1.00  0.00      chA   
ATOM   4791  N   SER c 405      11.892  23.839  97.941  1.00  0.00      chA   
ATOM   4792  H   SER c 405      11.182  23.125  97.859  1.00  0.00      chA   
ATOM   4793  CA  SER c 405      12.534  24.293  96.718  1.00  0.00      chA   
ATOM   4794  HA  SER c 405      13.265  25.039  97.025  1.00  0.00      chA   
ATOM   4795  CB  SER c 405      13.364  23.123  96.088  1.00  0.00      chA   
ATOM   4796  HB2 SER c 405      13.987  23.577  95.317  1.00  0.00      chA   
ATOM   4797  HB3 SER c 405      14.024  22.650  96.815  1.00  0.00      chA   
ATOM   4798  OG  SER c 405      12.565  22.078  95.533  1.00  0.00      chA   
ATOM   4799  HG  SER c 405      13.055  21.379  95.092  1.00  0.00      chA   
ATOM   4800  C   SER c 405      11.616  25.023  95.682  1.00  0.00      chA   
ATOM   4801  O   SER c 405      10.431  24.781  95.628  1.00  0.00      chA   
ATOM   4802  N   PHE c 406      12.299  25.851  94.891  1.00  0.00      chA   
ATOM   4803  H   PHE c 406      13.272  26.059  95.070  1.00  0.00      chA   
ATOM   4804  CA  PHE c 406      11.749  26.484  93.702  1.00  0.00      chA   
ATOM   4805  HA  PHE c 406      11.038  25.834  93.192  1.00  0.00      chA   
ATOM   4806  CB  PHE c 406      11.034  27.735  94.135  1.00  0.00      chA   
ATOM   4807  HB2 PHE c 406      10.571  28.164  93.247  1.00  0.00      chA   
ATOM   4808  HB3 PHE c 406      10.191  27.531  94.796  1.00  0.00      chA   
ATOM   4809  CG  PHE c 406      11.945  28.885  94.701  1.00  0.00      chA   
ATOM   4810  CD1 PHE c 406      12.536  28.737  95.938  1.00  0.00      chA   
ATOM   4811  HD1 PHE c 406      12.328  27.853  96.522  1.00  0.00      chA   
ATOM   4812  CE1 PHE c 406      13.310  29.680  96.446  1.00  0.00      chA   
ATOM   4813  HE1 PHE c 406      13.690  29.637  97.456  1.00  0.00      chA   
ATOM   4814  CZ  PHE c 406      13.501  30.881  95.751  1.00  0.00      chA   
ATOM   4815  HZ  PHE c 406      14.100  31.694  96.136  1.00  0.00      chA   
ATOM   4816  CE2 PHE c 406      12.910  31.114  94.438  1.00  0.00      chA   
ATOM   4817  HE2 PHE c 406      13.109  32.008  93.866  1.00  0.00      chA   
ATOM   4818  CD2 PHE c 406      12.130  30.055  93.966  1.00  0.00      chA   
ATOM   4819  HD2 PHE c 406      11.812  30.230  92.949  1.00  0.00      chA   
ATOM   4820  C   PHE c 406      12.816  26.712  92.634  1.00  0.00      chA   
ATOM   4821  O   PHE c 406      13.979  26.392  92.949  1.00  0.00      chA   
ATOM   4822  N   VAL c 407      12.491  27.368  91.531  1.00  0.00      chA   
ATOM   4823  H   VAL c 407      11.538  27.674  91.398  1.00  0.00      chA   
ATOM   4824  CA  VAL c 407      13.493  27.824  90.550  1.00  0.00      chA   
ATOM   4825  HA  VAL c 407      14.498  27.752  90.965  1.00  0.00      chA   
ATOM   4826  CB  VAL c 407      13.736  26.807  89.374  1.00  0.00      chA   
ATOM   4827  HB  VAL c 407      14.522  27.205  88.734  1.00  0.00      chA   
ATOM   4828  CG1 VAL c 407      14.155  25.382  89.771  1.00  0.00      chA   
ATOM   4829 HG11 VAL c 407      14.712  25.450  90.706  1.00  0.00      chA   
ATOM   4830 HG12 VAL c 407      13.261  24.800  89.989  1.00  0.00      chA   
ATOM   4831 HG13 VAL c 407      14.708  24.926  88.948  1.00  0.00      chA   
ATOM   4832  CG2 VAL c 407      12.494  26.814  88.396  1.00  0.00      chA   
ATOM   4833 HG21 VAL c 407      12.654  26.308  87.445  1.00  0.00      chA   
ATOM   4834 HG22 VAL c 407      11.586  26.495  88.909  1.00  0.00      chA   
ATOM   4835 HG23 VAL c 407      12.225  27.844  88.164  1.00  0.00      chA   
ATOM   4836  C   VAL c 407      13.339  29.224  89.959  1.00  0.00      chA   
ATOM   4837  O   VAL c 407      12.233  29.798  89.911  1.00  0.00      chA   
ATOM   4838  N   GLN c 408      14.341  29.723  89.239  1.00  0.00      chA   
ATOM   4839  H   GLN c 408      15.159  29.131  89.211  1.00  0.00      chA   
ATOM   4840  CA  GLN c 408      14.336  30.713  88.237  1.00  0.00      chA   
ATOM   4841  HA  GLN c 408      13.308  31.058  88.126  1.00  0.00      chA   
ATOM   4842  CB  GLN c 408      15.164  31.953  88.709  1.00  0.00      chA   
ATOM   4843  HB2 GLN c 408      16.202  31.636  88.612  1.00  0.00      chA   
ATOM   4844  HB3 GLN c 408      14.916  32.812  88.086  1.00  0.00      chA   
ATOM   4845  CG  GLN c 408      14.926  32.330  90.211  1.00  0.00      chA   
ATOM   4846  HG2 GLN c 408      13.901  32.679  90.341  1.00  0.00      chA   
ATOM   4847  HG3 GLN c 408      15.032  31.476  90.879  1.00  0.00      chA   
ATOM   4848  CD  GLN c 408      15.737  33.555  90.660  1.00  0.00      chA   
ATOM   4849  OE1 GLN c 408      16.802  33.859  90.182  1.00  0.00      chA   
ATOM   4850  NE2 GLN c 408      15.268  34.457  91.446  1.00  0.00      chA   
ATOM   4851 HE21 GLN c 408      15.680  35.376  91.516  1.00  0.00      chA   
ATOM   4852 HE22 GLN c 408      14.384  34.198  91.861  1.00  0.00      chA   
ATOM   4853  C   GLN c 408      14.643  30.127  86.831  1.00  0.00      chA   
ATOM   4854  O   GLN c 408      15.600  29.354  86.710  1.00  0.00      chA   
ATOM   4855  N   HID c 409      13.697  30.290  85.940  1.00  0.00      chA   
ATOM   4856  H   HID c 409      12.880  30.793  86.254  1.00  0.00      chA   
ATOM   4857  CA  HID c 409      13.810  29.870  84.538  1.00  0.00      chA   
ATOM   4858  HA  HID c 409      14.190  28.855  84.420  1.00  0.00      chA   
ATOM   4859  CB  HID c 409      12.429  29.900  83.860  1.00  0.00      chA   
ATOM   4860  HB2 HID c 409      11.879  30.812  84.091  1.00  0.00      chA   
ATOM   4861  HB3 HID c 409      12.679  29.880  82.800  1.00  0.00      chA   
ATOM   4862  CG  HID c 409      11.535  28.740  84.112  1.00  0.00      chA   
ATOM   4863  ND1 HID c 409      11.141  27.800  83.140  1.00  0.00      chA   
ATOM   4864  HD1 HID c 409      11.366  27.881  82.160  1.00  0.00      chA   
ATOM   4865  CE1 HID c 409      10.185  27.072  83.673  1.00  0.00      chA   
ATOM   4866  HE1 HID c 409       9.725  26.285  83.095  1.00  0.00      chA   
ATOM   4867  NE2 HID c 409       9.985  27.288  84.941  1.00  0.00      chA   
ATOM   4868  CD2 HID c 409      10.895  28.347  85.314  1.00  0.00      chA   
ATOM   4869  HD2 HID c 409      10.908  28.819  86.284  1.00  0.00      chA   
ATOM   4870  C   HID c 409      14.796  30.779  83.775  1.00  0.00      chA   
ATOM   4871  O   HID c 409      14.935  31.928  84.173  1.00  0.00      chA   
ATOM   4872  N   PRO c 410      15.239  30.270  82.593  1.00  0.00      chA   
ATOM   4873  CD  PRO c 410      15.303  28.893  82.152  1.00  0.00      chA   
ATOM   4874  HD2 PRO c 410      14.316  28.452  82.006  1.00  0.00      chA   
ATOM   4875  HD3 PRO c 410      15.874  28.315  82.879  1.00  0.00      chA   
ATOM   4876  CG  PRO c 410      16.084  28.885  80.866  1.00  0.00      chA   
ATOM   4877  HG2 PRO c 410      15.755  28.073  80.217  1.00  0.00      chA   
ATOM   4878  HG3 PRO c 410      17.149  28.809  81.081  1.00  0.00      chA   
ATOM   4879  CB  PRO c 410      15.930  30.204  80.260  1.00  0.00      chA   
ATOM   4880  HB2 PRO c 410      14.962  30.369  79.787  1.00  0.00      chA   
ATOM   4881  HB3 PRO c 410      16.693  30.485  79.534  1.00  0.00      chA   
ATOM   4882  CA  PRO c 410      15.872  31.065  81.550  1.00  0.00      chA   
ATOM   4883  HA  PRO c 410      16.867  31.281  81.938  1.00  0.00      chA   
ATOM   4884  C   PRO c 410      15.244  32.376  81.254  1.00  0.00      chA   
ATOM   4885  O   PRO c 410      15.936  33.362  81.192  1.00  0.00      chA   
ATOM   4886  N   GLU c 411      13.924  32.428  81.160  1.00  0.00      chA   
ATOM   4887  H   GLU c 411      13.401  31.573  81.041  1.00  0.00      chA   
ATOM   4888  CA  GLU c 411      13.079  33.556  80.794  1.00  0.00      chA   
ATOM   4889  HA  GLU c 411      13.351  34.022  79.847  1.00  0.00      chA   
ATOM   4890  CB  GLU c 411      11.610  33.081  80.688  1.00  0.00      chA   
ATOM   4891  HB2 GLU c 411      11.583  32.086  80.242  1.00  0.00      chA   
ATOM   4892  HB3 GLU c 411      11.190  32.923  81.682  1.00  0.00      chA   
ATOM   4893  CG  GLU c 411      10.711  33.950  79.884  1.00  0.00      chA   
ATOM   4894  HG2 GLU c 411       9.685  33.840  80.234  1.00  0.00      chA   
ATOM   4895  HG3 GLU c 411      11.125  34.953  79.987  1.00  0.00      chA   
ATOM   4896  CD  GLU c 411      10.760  33.569  78.372  1.00  0.00      chA   
ATOM   4897  OE1 GLU c 411      11.752  33.889  77.670  1.00  0.00      chA   
ATOM   4898  OE2 GLU c 411       9.785  32.862  77.991  1.00  0.00      chA   
ATOM   4899  C   GLU c 411      13.175  34.674  81.810  1.00  0.00      chA   
ATOM   4900  O   GLU c 411      13.227  35.813  81.414  1.00  0.00      chA   
ATOM   4901  N   LEU c 412      13.162  34.334  83.103  1.00  0.00      chA   
ATOM   4902  H   LEU c 412      13.275  33.348  83.288  1.00  0.00      chA   
ATOM   4903  CA  LEU c 412      13.294  35.315  84.250  1.00  0.00      chA   
ATOM   4904  HA  LEU c 412      12.549  36.104  84.148  1.00  0.00      chA   
ATOM   4905  CB  LEU c 412      12.957  34.586  85.552  1.00  0.00      chA   
ATOM   4906  HB2 LEU c 412      11.949  34.215  85.369  1.00  0.00      chA   
ATOM   4907  HB3 LEU c 412      13.479  33.634  85.645  1.00  0.00      chA   
ATOM   4908  CG  LEU c 412      13.057  35.388  86.907  1.00  0.00      chA   
ATOM   4909  HG  LEU c 412      14.137  35.450  87.045  1.00  0.00      chA   
ATOM   4910  CD1 LEU c 412      12.460  36.803  86.984  1.00  0.00      chA   
ATOM   4911 HD11 LEU c 412      13.208  37.519  86.643  1.00  0.00      chA   
ATOM   4912 HD12 LEU c 412      11.582  36.849  86.340  1.00  0.00      chA   
ATOM   4913 HD13 LEU c 412      12.184  37.076  88.002  1.00  0.00      chA   
ATOM   4914  CD2 LEU c 412      12.706  34.619  88.186  1.00  0.00      chA   
ATOM   4915 HD21 LEU c 412      11.654  34.771  88.432  1.00  0.00      chA   
ATOM   4916 HD22 LEU c 412      12.844  33.549  88.034  1.00  0.00      chA   
ATOM   4917 HD23 LEU c 412      13.322  34.902  89.039  1.00  0.00      chA   
ATOM   4918  C   LEU c 412      14.656  35.980  84.309  1.00  0.00      chA   
ATOM   4919  O   LEU c 412      14.748  37.238  84.465  1.00  0.00      chA   
ATOM   4920  N   THR c 413      15.713  35.207  84.260  1.00  0.00      chA   
ATOM   4921  H   THR c 413      15.589  34.283  83.873  1.00  0.00      chA   
ATOM   4922  CA  THR c 413      17.097  35.482  84.568  1.00  0.00      chA   
ATOM   4923  HA  THR c 413      17.102  36.288  85.302  1.00  0.00      chA   
ATOM   4924  CB  THR c 413      17.747  34.212  85.231  1.00  0.00      chA   
ATOM   4925  HB  THR c 413      18.762  34.382  85.590  1.00  0.00      chA   
ATOM   4926  CG2 THR c 413      16.986  33.575  86.344  1.00  0.00      chA   
ATOM   4927 HG21 THR c 413      17.744  32.910  86.760  1.00  0.00      chA   
ATOM   4928 HG22 THR c 413      16.732  34.287  87.130  1.00  0.00      chA   
ATOM   4929 HG23 THR c 413      16.115  32.968  86.096  1.00  0.00      chA   
ATOM   4930  OG1 THR c 413      17.774  33.231  84.222  1.00  0.00      chA   
ATOM   4931  HG1 THR c 413      17.807  32.378  84.661  1.00  0.00      chA   
ATOM   4932  C   THR c 413      18.066  35.875  83.461  1.00  0.00      chA   
ATOM   4933  O   THR c 413      19.185  36.385  83.704  1.00  0.00      chA   
ATOM   4934  N   GLY c 414      17.610  35.735  82.158  1.00  0.00      chA   
ATOM   4935  H   GLY c 414      16.696  35.330  82.017  1.00  0.00      chA   
ATOM   4936  CA  GLY c 414      18.486  35.861  80.974  1.00  0.00      chA   
ATOM   4937  HA2 GLY c 414      17.754  35.899  80.168  1.00  0.00      chA   
ATOM   4938  HA3 GLY c 414      18.975  36.836  80.972  1.00  0.00      chA   
ATOM   4939  C   GLY c 414      19.602  34.818  80.761  1.00  0.00      chA   
ATOM   4940  O   GLY c 414      20.686  35.109  80.229  1.00  0.00      chA   
ATOM   4941  N   LEU c 415      19.450  33.693  81.437  1.00  0.00      chA   
ATOM   4942  H   LEU c 415      18.633  33.517  82.004  1.00  0.00      chA   
ATOM   4943  CA  LEU c 415      20.530  32.638  81.430  1.00  0.00      chA   
ATOM   4944  HA  LEU c 415      21.522  33.087  81.392  1.00  0.00      chA   
ATOM   4945  CB  LEU c 415      20.483  31.849  82.740  1.00  0.00      chA   
ATOM   4946  HB2 LEU c 415      19.478  31.427  82.749  1.00  0.00      chA   
ATOM   4947  HB3 LEU c 415      21.110  30.965  82.616  1.00  0.00      chA   
ATOM   4948  CG  LEU c 415      20.940  32.560  83.966  1.00  0.00      chA   
ATOM   4949  HG  LEU c 415      20.350  33.466  84.106  1.00  0.00      chA   
ATOM   4950  CD1 LEU c 415      20.963  31.640  85.199  1.00  0.00      chA   
ATOM   4951 HD11 LEU c 415      20.287  30.784  85.168  1.00  0.00      chA   
ATOM   4952 HD12 LEU c 415      21.886  31.110  85.433  1.00  0.00      chA   
ATOM   4953 HD13 LEU c 415      20.534  32.120  86.078  1.00  0.00      chA   
ATOM   4954  CD2 LEU c 415      22.395  33.006  83.817  1.00  0.00      chA   
ATOM   4955 HD21 LEU c 415      22.841  33.315  84.762  1.00  0.00      chA   
ATOM   4956 HD22 LEU c 415      22.901  32.144  83.381  1.00  0.00      chA   
ATOM   4957 HD23 LEU c 415      22.520  33.932  83.257  1.00  0.00      chA   
ATOM   4958  C   LEU c 415      20.419  31.667  80.233  1.00  0.00      chA   
ATOM   4959  O   LEU c 415      19.409  31.757  79.516  1.00  0.00      chA   
ATOM   4960  N   ASP c 416      21.278  30.636  80.155  1.00  0.00      chA   
ATOM   4961  H   ASP c 416      22.137  30.679  80.685  1.00  0.00      chA   
ATOM   4962  CA  ASP c 416      21.155  29.427  79.263  1.00  0.00      chA   
ATOM   4963  HA  ASP c 416      20.636  29.663  78.335  1.00  0.00      chA   
ATOM   4964  CB  ASP c 416      22.501  29.188  78.616  1.00  0.00      chA   
ATOM   4965  HB2 ASP c 416      22.930  30.107  78.219  1.00  0.00      chA   
ATOM   4966  HB3 ASP c 416      23.113  28.959  79.488  1.00  0.00      chA   
ATOM   4967  CG  ASP c 416      22.427  28.119  77.579  1.00  0.00      chA   
ATOM   4968  OD1 ASP c 416      21.971  28.433  76.456  1.00  0.00      chA   
ATOM   4969  OD2 ASP c 416      22.952  27.071  77.783  1.00  0.00      chA   
ATOM   4970  C   ASP c 416      20.472  28.209  79.944  1.00  0.00      chA   
ATOM   4971  O   ASP c 416      20.214  27.165  79.359  1.00  0.00      chA   
ATOM   4972  N   CYX c 417      20.244  28.276  81.251  1.00  0.00      chA   
ATOM   4973  H   CYX c 417      20.561  29.116  81.715  1.00  0.00      chA   
ATOM   4974  CA  CYX c 417      19.946  27.112  82.151  1.00  0.00      chA   
ATOM   4975  HA  CYX c 417      19.536  26.343  81.496  1.00  0.00      chA   
ATOM   4976  CB  CYX c 417      21.301  26.577  82.618  1.00  0.00      chA   
ATOM   4977  HB2 CYX c 417      21.217  25.681  83.232  1.00  0.00      chA   
ATOM   4978  HB3 CYX c 417      21.816  26.265  81.709  1.00  0.00      chA   
ATOM   4979  SG  CYX c 417      22.291  27.717  83.604  1.00  0.00      chA   
ATOM   4980  C   CYX c 417      18.918  27.426  83.285  1.00  0.00      chA   
ATOM   4981  O   CYX c 417      18.591  28.545  83.618  1.00  0.00      chA   
ATOM   4982  N   ILE c 418      18.490  26.408  84.083  1.00  0.00      chA   
ATOM   4983  H   ILE c 418      18.770  25.486  83.780  1.00  0.00      chA   
ATOM   4984  CA  ILE c 418      17.508  26.575  85.124  1.00  0.00      chA   
ATOM   4985  HA  ILE c 418      17.033  27.502  84.804  1.00  0.00      chA   
ATOM   4986  CB  ILE c 418      16.531  25.415  85.069  1.00  0.00      chA   
ATOM   4987  HB  ILE c 418      17.099  24.535  85.370  1.00  0.00      chA   
ATOM   4988  CG2 ILE c 418      15.320  25.726  86.013  1.00  0.00      chA   
ATOM   4989 HG21 ILE c 418      14.650  24.868  85.958  1.00  0.00      chA   
ATOM   4990 HG22 ILE c 418      15.559  25.849  87.069  1.00  0.00      chA   
ATOM   4991 HG23 ILE c 418      14.794  26.625  85.693  1.00  0.00      chA   
ATOM   4992  CG1 ILE c 418      15.929  25.205  83.634  1.00  0.00      chA   
ATOM   4993 HG12 ILE c 418      15.226  26.027  83.499  1.00  0.00      chA   
ATOM   4994 HG13 ILE c 418      16.673  25.087  82.846  1.00  0.00      chA   
ATOM   4995  CD1 ILE c 418      15.168  23.872  83.476  1.00  0.00      chA   
ATOM   4996 HD11 ILE c 418      15.813  23.014  83.667  1.00  0.00      chA   
ATOM   4997 HD12 ILE c 418      14.300  23.777  84.129  1.00  0.00      chA   
ATOM   4998 HD13 ILE c 418      14.863  23.596  82.467  1.00  0.00      chA   
ATOM   4999  C   ILE c 418      18.257  26.756  86.482  1.00  0.00      chA   
ATOM   5000  O   ILE c 418      18.904  25.837  87.016  1.00  0.00      chA   
ATOM   5001  N   ARG c 419      18.144  27.966  87.018  1.00  0.00      chA   
ATOM   5002  H   ARG c 419      17.467  28.643  86.698  1.00  0.00      chA   
ATOM   5003  CA  ARG c 419      18.764  28.245  88.315  1.00  0.00      chA   
ATOM   5004  HA  ARG c 419      19.801  27.909  88.356  1.00  0.00      chA   
ATOM   5005  CB  ARG c 419      18.764  29.750  88.509  1.00  0.00      chA   
ATOM   5006  HB2 ARG c 419      19.501  30.143  87.808  1.00  0.00      chA   
ATOM   5007  HB3 ARG c 419      17.751  30.043  88.228  1.00  0.00      chA   
ATOM   5008  CG  ARG c 419      19.001  30.132  90.000  1.00  0.00      chA   
ATOM   5009  HG2 ARG c 419      18.096  29.808  90.514  1.00  0.00      chA   
ATOM   5010  HG3 ARG c 419      19.900  29.682  90.423  1.00  0.00      chA   
ATOM   5011  CD  ARG c 419      19.258  31.672  90.049  1.00  0.00      chA   
ATOM   5012  HD2 ARG c 419      18.340  32.034  89.585  1.00  0.00      chA   
ATOM   5013  HD3 ARG c 419      19.206  32.062  91.065  1.00  0.00      chA   
ATOM   5014  NE  ARG c 419      20.398  32.277  89.409  1.00  0.00      chA   
ATOM   5015  HE  ARG c 419      21.338  31.991  89.645  1.00  0.00      chA   
ATOM   5016  CZ  ARG c 419      20.393  33.444  88.758  1.00  0.00      chA   
ATOM   5017  NH1 ARG c 419      19.327  34.180  88.589  1.00  0.00      chA   
ATOM   5018 HH11 ARG c 419      18.536  33.985  89.185  1.00  0.00      chA   
ATOM   5019 HH12 ARG c 419      19.481  34.979  87.991  1.00  0.00      chA   
ATOM   5020  NH2 ARG c 419      21.485  33.680  88.128  1.00  0.00      chA   
ATOM   5021 HH21 ARG c 419      22.291  33.083  88.252  1.00  0.00      chA   
ATOM   5022 HH22 ARG c 419      21.418  34.336  87.363  1.00  0.00      chA   
ATOM   5023  C   ARG c 419      17.991  27.547  89.489  1.00  0.00      chA   
ATOM   5024  O   ARG c 419      16.817  27.884  89.655  1.00  0.00      chA   
ATOM   5025  N   PRO c 420      18.700  26.622  90.223  1.00  0.00      chA   
ATOM   5026  CD  PRO c 420      20.091  26.188  90.045  1.00  0.00      chA   
ATOM   5027  HD2 PRO c 420      20.793  26.997  90.249  1.00  0.00      chA   
ATOM   5028  HD3 PRO c 420      20.229  25.648  89.108  1.00  0.00      chA   
ATOM   5029  CG  PRO c 420      20.239  25.074  91.130  1.00  0.00      chA   
ATOM   5030  HG2 PRO c 420      20.911  25.487  91.882  1.00  0.00      chA   
ATOM   5031  HG3 PRO c 420      20.742  24.237  90.645  1.00  0.00      chA   
ATOM   5032  CB  PRO c 420      18.840  24.704  91.615  1.00  0.00      chA   
ATOM   5033  HB2 PRO c 420      18.921  24.400  92.659  1.00  0.00      chA   
ATOM   5034  HB3 PRO c 420      18.489  23.879  90.993  1.00  0.00      chA   
ATOM   5035  CA  PRO c 420      18.081  26.007  91.435  1.00  0.00      chA   
ATOM   5036  HA  PRO c 420      17.049  25.809  91.146  1.00  0.00      chA   
ATOM   5037  C   PRO c 420      18.208  26.876  92.695  1.00  0.00      chA   
ATOM   5038  O   PRO c 420      19.219  27.453  92.921  1.00  0.00      chA   
ATOM   5039  N   CYX c 421      17.154  27.041  93.472  1.00  0.00      chA   
ATOM   5040  H   CYX c 421      16.372  26.458  93.207  1.00  0.00      chA   
ATOM   5041  CA  CYX c 421      17.169  27.741  94.719  1.00  0.00      chA   
ATOM   5042  HA  CYX c 421      18.180  27.816  95.119  1.00  0.00      chA   
ATOM   5043  CB  CYX c 421      16.327  28.981  94.391  1.00  0.00      chA   
ATOM   5044  HB2 CYX c 421      15.297  28.715  94.154  1.00  0.00      chA   
ATOM   5045  HB3 CYX c 421      16.217  29.505  95.340  1.00  0.00      chA   
ATOM   5046  SG  CYX c 421      16.984  30.112  93.114  1.00  0.00      chA   
ATOM   5047  C   CYX c 421      16.425  26.916  95.851  1.00  0.00      chA   
ATOM   5048  O   CYX c 421      15.754  25.928  95.663  1.00  0.00      chA   
ATOM   5049  N   PHE c 422      16.576  27.341  97.146  1.00  0.00      chA   
ATOM   5050  H   PHE c 422      17.247  28.091  97.231  1.00  0.00      chA   
ATOM   5051  CA  PHE c 422      15.798  26.759  98.216  1.00  0.00      chA   
ATOM   5052  HA  PHE c 422      14.932  26.280  97.757  1.00  0.00      chA   
ATOM   5053  CB  PHE c 422      16.653  25.643  98.872  1.00  0.00      chA   
ATOM   5054  HB2 PHE c 422      15.866  25.255  99.517  1.00  0.00      chA   
ATOM   5055  HB3 PHE c 422      17.000  24.859  98.199  1.00  0.00      chA   
ATOM   5056  CG  PHE c 422      17.836  26.010  99.708  1.00  0.00      chA   
ATOM   5057  CD1 PHE c 422      17.811  25.945 101.072  1.00  0.00      chA   
ATOM   5058  HD1 PHE c 422      16.857  25.977 101.577  1.00  0.00      chA   
ATOM   5059  CE1 PHE c 422      18.935  26.128 101.903  1.00  0.00      chA   
ATOM   5060  HE1 PHE c 422      18.747  26.190 102.963  1.00  0.00      chA   
ATOM   5061  CZ  PHE c 422      20.176  26.141 101.273  1.00  0.00      chA   
ATOM   5062  HZ  PHE c 422      21.112  26.192 101.809  1.00  0.00      chA
[truncated: 54,357 more chars]
